# Supplementary material for: Chromosome-length genome assembly and structural variations of the primal Basenji dog (Canis lupus familiaris) genome
Source: bioRxiv preprint, doi:10.1101/2020.11.11.379073, version 4 (2021-02-24)
Supplement: Additional File 2 [file 379073_file03.xlsx]

## Sheet: Supp Table 1. Statistics
Supplementary Table 1. Assembly statistics for China assembly stages and other dog genomes used in the study.
Assemblies		General Statistics																BUSCO					BUSCOMP									Merqury
Genome	Description	SeqNum	TotLength	Ungapped	MinLength	MaxLength	MeanLength	MedLength	N50Length	L50Count	N50Ctg	L50Ctg	NG50Length	LG50Count	GapLength	GapCount	GC	N	Duplicated	Complete	Fragmented	Missing	N2	Identical	Complete3	Single	Duplicated4	Fragmented5	Partial	Ghost	Missing6	kmer-genome	kmer-reads	completeness	uniq-kmer	shared-kmer	QV	error-rate
china.v0.0.flye	China v0.0 ONT Flye assembly	2324	2345865267	2345863367	168	58407245	1.00941e+06	2516	27032496	33	23873472	35	26358664	34	1900	19	41.29	6253	48	4641	685	879	6100	24.23	99.67	94.51	5.164	0.06557	0.2295	0.03279	0	1892097299	2052014329	92.2068	113460458	2345816507	26.2746	0.00235798
china.v0.1.racon4x	China v0.1 4xRacon ONT-polished Flye assembly	1522	2339105222	2339105222	250	58271721	1.53686e+06	4028.5	26994052	33	26994052	33	24215228	35	0	0	41.1	6253	56	4743	662	792	6100	6.115	99.64	94.49	5.148	0.06557	0.2623	0.03279	0	1912244217	2052014329	93.1886	86372896	2339074782	27.4713	0.00179007
china.v0.2.medaka	China v0.2 4xRacon+Medaka ONT-polished Flye assembly	1657	2342331962	2342331962	104	58376669	1.4136e+06	3613	27026886	33	27026886	33	26356313	34	0	0	41.21	6253	54	5262	504	433	6100	18.8	99.66	94.51	5.148	0.06557	0.2459	0.03279	0	1967928116	2052014329	95.9023	37283557	2342298822	31.1703	0.000763782
china.v0.3.pilon	China v0.3 4xRacon+Medaka+Pilon ONT+BGI-polished Flye assembly	1657	2342251166	2342251166	104	58376247	1.41355e+06	3618	27032799	33	27032799	33	26343204	34	0	0	41.21	6253	75	5714	265	199	6100	47.97	99.66	94.54	5.115	0.06557	0.2459	0.03279	0	2002033060	2052014329	97.5643	6041180	2342218026	39.1019	0.000122973
china.v0.4.hic	China v0.4 HiC-scaffolded polished Flye assembly	1465	2342594266	2342420266	63	124799802	1.59904e+06	2451	64217693	14	21004759	39	63092115	15	174000	348	41.21	6253	67	5732	257	197	6100	48.51	99.67	94.69	4.984	0.01639	0.2295	0.04918	0.03279	2001748319	2052014329	97.5504	6203314	2342384006	38.9871	0.000126268
china.v0.5.pbjelly	China v0.5 PBJelly gap-filled HiC-scaffolded Flye assembly	1407	2347406909	2347392270	63	136761792	1.66838e+06	2817	70337616	13	37760248	22	70337616	13	14639	148	41.22	6253	68	5721	255	209	6100	48.49	99.67	94.67	5	0.01639	0.2295	0.04918	0.03279	2001986468	2052014329	97.562	8281294	2347361170	37.7397	0.000168279
china.v0.6.pilon2	China v0.6 Pilon BGI-polished scaffolded Flye assembly	1407	2347386494	2347371855	63	136760998	1.66836e+06	2817	70336976	13	37759230	22	70336976	13	14639	148	41.22	6253	67	5731	246	209	6100	48.84	99.67	94.67	5	0.01639	0.2295	0.04918	0.03279	2002713703	2052014329	97.5975	7502338	2347340755	38.1694	0.000152427
china.v0.7.pafscaff	China v0.7 Polished scaffolded assembly mapped onto CanFam v3.1 chromosomes	1407	2347386494	2347371855	63	136760998	1.66836e+06	2817	70336976	13	37759230	22	70336976	13	14639	148	41.22	6253	72	5739	236	206	6100	48.87	99.64	94.67	4.967	0.01639	0.2295	0.08197	0.03279	2002713703	2052014329	97.5975	7502338	2347340755	38.1694	0.000152427
china.v1.0	China v0.8 Diploidocus-tidied final draft China assembly (China v1.0)	648	2344971389	2344953383	503	136760998	3.61878e+06	5465	70336976	13	37759230	22	70336976	13	18006	149	41.21	6253	71	5740	236	206	6100	48.87	99.64	94.69	4.951	0.01639	0.2295	0.08197	0.03279	2002426908	2052014329	97.5835	6835596	2344937443	38.5697	0.000139005
china.v1.0.chrom	China v1.0 main chromosome scaffolds	39	2329293140	2329240693	24377179	125260708	5.97255e+07	58423659	64291023	14	37759230	23	63189501	15	52447	100	41.17	6253	70	5741	234	208	6100	48.85	99.64	94.7	4.934	0.01639	0.2295	0.08197	0.03279
china.v1.1	China v1.1 NCBI submission with fixed chromosome fusions	650	2345029490	2344953059	503	125260708	3.60774e+06	5478.5	64291023	14	37759230	23	63189501	15	76431	149	41.21	6253	71	5739	234	209	6100	48.85	99.64	94.69	4.951	0.01639	0.2295	0.08197	0.03279	2002426846	2052014329	97.5835	6835566	2344937079	38.5697	0.000139004
china.v1.2	China v1.2 Revised China assembly with fixed Chromosome 29 NuMT and contigs <1kb removed	631	2344986233	2344909802	1009	125260708	3.7163e+06	5731	64291023	14	37759230	23	63189501	15	76431	149	41.21	6253	71	5739	234	209	6100	48.85	99.64	94.69	4.951	0.01639	0.2295	0.08197	0.03279	2002412774	2052014329	97.5828	6833623	2344894202	38.5709	0.000138967
china.v1.2.10kb	China v1.2 Core 10kb+ scaffolds	232	2343410341	2343333910	10039	125260708	1.01009e+07	39873.5	64291023	14	37759230	23	63189501	15	76431	149	41.2	6253	71	5739	234	209	6100	48.85	99.64	94.69	4.951	0.01639	0.2295	0.08197	0.03279	2002241942	2052014329	97.5745	6623800	2343326290	38.7036	0.000134785
china.v1.2.chrom	China v1.2 main chromosome scaffolds	39	2329264020	2329211573	24377179	125260708	5.97247e+07	58423659	64291023	14	37759230	23	63189501	15	52447	100	41.17	6253	70	5741	234	208	6100	48.85	99.64	94.7	4.934	0.01639	0.2295	0.08197	0.03279
CanFam_Bas	CanFam_Bas China v1.2 assembly, plus mitochondrial genome	632	2345002994	2344926563	1009	125260708	3.71045e+06	5736.5	64291023	14	37759230	23	63189501	15	76431	149	41.21	6253	71	5739	234	209	6100	48.85	99.64	94.69	4.951	0.01639	0.2295	0.08197	0.03279	2002425483	2052014329	97.5834	6833623	2344910943	38.5709	0.000138966
China	Combined China assembly stages (BUSCOMP only)																	6253	12	6074	64	103	6100	0	99.75	94.87	4.885	0.01639	0.2131	0.01639	0
wags.v1.1	Wags Basenji assembly v1.1 GCA_004886185.2	2243	2410429933	2410291233	6779	123211329	1.07465e+06	42273	61087166	16	3131423	217	61087166	16	138700	1387	41.36	6253	82	5639	283	249	6100	43.7	98.43	93.13	5.295	0.2295	0.8689	0.2787	0.1967
wags.v1.1.chrom	Wags v1.1 main chromosome scaffolds	39	2286000096	2285861996	28039753	123211329	5.86154e+07	58342078	61274441	15	3377280	198	61087166	16	138100	1381	41.26	6253	72	5583	273	325	6100	42.82	97.23	92.57	4.656	0.04918	0.6885	0.4426	1.59
nala.v1.0	Canfam_GSD Nala German Shepherd v1.0	410	2407229539	2401085082	2640	126700074	5.87129e+06	83129.5	64346267	15	20914347	37	64346267	15	6144457	306	41.32	6253	86	5729	227	211	6100	44.07	99.67	94.52	5.148	0.03279	0.2459	0.04918	0
nala.v1.0.chrom	Nala v1.0 main chromosome scaffolds	39	2366519884	2360927245	24637172	126700074	6.068e+07	59143933	64489398	14	22604462	36	64346267	15	5592639	262	41.21	6253	81	5734	228	210	6100	43.98	99.66	94.64	5.016	0.03279	0.2623	0.04918	0
canfam.v3.1	CanFam3.1 dog reference genome (Boxer)	3268	2410976875	2392715236	1115	123869142	737753	9667.5	63241923	15	264917	2471	63241923	15	18261639	23876	41.31	6253	73	5695	252	233	6100	50.44	97.38	92.57	4.803	0.1311	2.377	0.06557	0.04918
canfam.v3.1.chrom	Canfam.v3.1 main chromosome scaffolds	39	2327633984	2317593971	23914537	123869142	5.96829e+07	58134056	64190966	14	275623	2321	63241923	15	10040013	19553	41.06	6253	70	5687	255	241	6100	50.33	97.26	92.52	4.738	0.08197	2.361	0.08197	0.2131

## Sheet: Supp Table 2. Scaffolds
Supplementary Table 2. Diploidocus statistics and ratings for China scaffolds during tidying. See Diploidocus documentation for more information.
SeqName	SeqLen	Median_fold	Avg_fold	Covered_percent	Covered_bases	Plus_reads	Minus_reads	Read_GC	LowPerc	HapPerc	DipPerc	HighPerc	TopHit	SecHit	TopHitCov	MaxHitCov	PurgeHap	TopNum	SecNum	SelfMedK	SelfAvgK	MedK	AvgK	SeqGC	KPerc	ScreenCov	ScreenPerc	Tel5	Tel3	Trim5	Trim3	TelPerc	Complete	Duplicated	Fragmented	N_bases	Gap_bases	SeqDesc	Class	TopClass	SecClass	Rating	TopRating	SecRating	Set	Cycle
BASENJICHR1.01	122492982	35	34.9667	99.9995	122492412	248730	248688	0.4097	0.05134	5.986	93.91	0.053	-	-	0	0	KEEP	0	1	1	863.357	37	21941.5	0.41658	99.6561	53	0	FALSE	FALSE	-1	-1	0	291	7	10	150	150	RevComp BASPBJ0459_pilon len=122.5 Mb 99.08% 1(-) 211,544:122,678,726; 0.70% 1(+); 0.09% other; Diploidocus:PRIMARY|PRIMARY|PRIMARY|PRIMARY|PRIMARY|PRIMARY	PURE|DIP|UNIQ|SEC|PRI|COMP|+VEC	-	-	PRIMARY	-	-	keep	7
BASENJICHR1.02	831448	47	152.201	99.5739	827905	7851	8695	0.4963	5.795	7.32	49.72	37.16	BASENJICHR19.01	BASENJICHR35.02	93.86	2553.12	KEEP	14	33	5	634.095	328	29252.2	0.41823	83.4086	0	0	FALSE	FALSE	-1	-1	0	0	0	0	1175	1175	BASPBJ0955_pilon len=831.4 kb 0.83% 1(+) 162,651:169,747; 0.48% 1(-); 3.72% other; Diploidocus:PRIMARY|PRIMARY|PRIMARY|PRIMARY|PRIMARY|PRIMARY	WEAK|DIP|REPT|TOP|REP|NONE	PURE|DIP|UNIQ|TOP|PRI|COMP	GOOD|EXS|REPT|TOP|REP|NONE	PRIMARY	PRIMARY	PRIMARY	keep	7
BASENJICHR1.03	69250	30	2634.59	99.7242	69059	12467	12295	0.4546	0.2848	28.93	37.27	33.51	BASENJICHR35.02	BASENJICHR38.01	77.19	3034.32	KEEP	1	0	3	923.674	220	31241.5	0.38773	92.9172	0	0	FALSE	FALSE	-1	-1	0	0	0	0	0	0	BASPBJ1356_pilon len=69.25 kb 2.80% 1(+) 67,760:69,701; Diploidocus:PRIMARY|PRIMARY|PRIMARY|PRIMARY|PRIMARY|PRIMARY	WEAK|DIP|REPT|TOP|REP|NONE	GOOD|EXS|REPT|TOP|REP|NONE	PURE|DIP|UNIQ|SEC|PRI|COMP	PRIMARY	PRIMARY	PRIMARY	keep	7
BASENJICHR1.04	55741	1146	1282.77	100	55741	6252	6245	0.4793	0.014	0.005	2.291	97.69	-	-	0	0	JUNK	0	0	4	632.526	1831	21773.9	0.49088	87.8345	0	0	TRUE	FALSE	0	0	6.87106	0	0	0	0	0	BASPBJ0092_pilon len=55.74 kb 32.34% 1(+) 14,824:52,640; 96.48% other; Diploidocus:COLLAPSED|COLLAPSED|COLLAPSED|COLLAPSED|COLLAPSED|COLLAPSED	PURE|EXS|UNIQ|NON|REP|NONE|+TEL	-	-	COLLAPSED	-	-	repeat	7
BASENJICHR1.05	48368	228	229.965	100	48368	1056	285	0.5016	0	0	6.719	93.28	-	-	0	0	JUNK	0	0	257	862.617	70113	225741	0.51908	85.7081	0	0	FALSE	FALSE	-1	-1	0	0	0	0	0	0	RevComp BASPBJ1268_pilon len=48.37 kb 6.16% 1(-) 9,843:11,583; 2.29% other; Diploidocus:COLLAPSED|COLLAPSED|COLLAPSED|COLLAPSED|COLLAPSED|COLLAPSED	PURE|EXS|UNIQ|NON|REP|NONE	-	-	COLLAPSED	-	-	repeat	7
BASENJICHR1.06	42521	46	68.0141	100	42521	211	183	0.5032	0	6.446	62.14	31.41	BASENJISCAFF0299	BASENJICHR19.05	99.54	929.92	REPEAT	0	0	1888	2131.82	208731	264487	0.50279	97.7574	0	0	FALSE	FALSE	-1	-1	0	0	0	0	0	0	RevComp BASPBJ0343_pilon len=42.52 kb 1.80% 1(-) 84,084,273:84,085,036; 2.87% other; Diploidocus:PRIMARY|PRIMARY|PRIMARY|PRIMARY|PRIMARY|PRIMARY	GOOD|DIP|REPT|NON|REP|NONE	GOOD|EXS|REPT|TOP|REP|NONE	GOOD|DIP|REPT|SEC|REP|NONE	PRIMARY	PRIMARY	PRIMARY	keep	7
BASENJICHR1.07	12184	1	1.9485	100	12184	16	10	0.4689	96.07	3.931	0	0	-	-	0	0	JUNK	0	0	1	4.98503	0	987.182	0.45609	36.7412	0	0	FALSE	FALSE	-1	-1	0	0	0	0	0	0	RevComp BASPBJ1148_pilon len=12.18 kb 19.23% 1(-) 53,420:69,595,854; 16.41% other;	LOWX|LOW|UNIQ|NON|PRI|NONE	-	-	LOWCOV	-	-	junk	1
BASENJICHR1.08	10243	33	31.7739	99.8536	10228	54	45	0.4581	0.1854	9.401	90.41	0	-	-	0	0	KEEP	0	0	2	170.758	68	6395.19	0.47672	89.9383	0	0	FALSE	FALSE	-1	-1	0	0	0	0	0	0	RevComp BASPBJ0062_pilon len=10.24 kb 26.26% 1(-) 236,722:25,733,383; 17.43% 1(+); Diploidocus:PRIMARY|PRIMARY|PRIMARY|PRIMARY|PRIMARY|PRIMARY	PURE|DIP|UNIQ|NON|ALT|NONE	-	-	PRIMARY	-	-	keep	7
BASENJICHR1.09	4471	10	8.5059	100	4471	10	4	0.4206	35.92	64.08	0	0	BASENJICHR1.01	-	36.05	45.9	KEEP	0	0	2	2512.69	38	83318.6	0.4272	90.5287	0	0	FALSE	FALSE	-1	-1	0	0	0	0	0	0	RevComp BASPBJ0479_pilon len=4.471 kb 76.52% 1(-) 35,580,878:111,958,880;	GOOD|HAP|PART|NON|ALT|NONE	PURE|DIP|UNIQ|TOP|PRI|COMP|+VEC	-	HPURGE	PRIMARY	-	quarantine	1
BASENJICHR1.10	3533	17	15.7526	100	3533	18	20	0.4449	25.76	54.37	19.87	0	BASENJICHR35.02	BASENJISCAFF1100	15.26	31.79	KEEP	0	0	2603	3146.9	114128	127342	0.43164	99.6293	0	0	FALSE	FALSE	-1	-1	0	0	0	0	0	0	BASPBJ0940_pilon len=3.533 kb 53.55% 1(+) 3,105,641:3,107,532; 29.66% other;	GOOD|HAP|PART|NON|REP|NONE	GOOD|EXS|REPT|TOP|REP|NONE	WEAK|LOW|REPT|TOP|PRI|NONE	HPURGE	PRIMARY	KEEP	quarantine	1
BASENJICHR1.11	2848	6	6.7605	99.4733	2833	11	12	0.4436	58.36	41.64	0	0	BASENJICHR1.01	BASENJICHR31.01	89.92	411.24	KEEP	0	0	1	8.38944	0	326.678	0.44733	41.2828	0	0	FALSE	FALSE	-1	-1	0	0	0	0	0	0	RevComp BASPBJ1085_pilon len=2.848 kb 202.35% 1(-) 112,510,115:112,549,155;	GOOD|LOW|REPT|NON|PRI|NONE	PURE|DIP|UNIQ|TOP|PRI|COMP|+VEC	PURE|DIP|UNIQ|TOP|PRI|COMP	HPURGE	PRIMARY	PRIMARY	quarantine	1
BASENJICHR1.12	1205	7	5.9129	99.1701	1195	3	10	0.3275	63.73	36.27	0	0	BASENJICHR19.01	BASENJICHR20.01	97.51	1033.03	REPEAT	0	0	1	4.41391	324	3027.59	0.33195	69.6353	0	0	FALSE	FALSE	-1	-1	0	0	0	0	0	0	RevComp BASPBJ0240_pilon len=1.205 kb 54.11% 1(-) 42,986:43,617;	GOOD|LOW|REPT|NON|PRI|NONE	PURE|DIP|UNIQ|TOP|PRI|COMP	PURE|DIP|UNIQ|TOP|PRI|COMP|+VEC	HPURGE	PRIMARY	PRIMARY	quarantine	1
BASENJICHR10.01	70336976	34	34.7358	100	70336957	142311	142697	0.4194	0.004	6.707	93.23	0.054	-	-	0	0	KEEP	3	2	1	870.394	37	22773.9	0.42825	99.5924	53	0	FALSE	FALSE	-1	-1	0	226	4	2	25	25	RevComp BASPBJ0689_pilon len=70.34 Mb 97.92% 10(-) 101:69,331,281; 0.07% 10(+); 0.49% other; Diploidocus:PRIMARY|PRIMARY|PRIMARY|PRIMARY|PRIMARY|PRIMARY	PURE|DIP|UNIQ|TOP|PRI|COMP|+VEC	-	-	PRIMARY	-	-	keep	7
BASENJICHR10.02	212328	83	72.0961	99.9812	212288	898	895	0.4308	7.985	8.918	22.84	60.26	BASENJICHR10.01	BASENJICHR16.01	72.83	596.71	KEEP	2	0	2	1139.77	117	36768.4	0.43386	86.8877	0	0	FALSE	FALSE	-1	-1	0	0	0	0	25	25	BASPBJ0477_pilon len=212.3 kb 11.08% 10(+) 16,389,422:16,498,650; 13.23% other; Diploidocus:PRIMARY|PRIMARY|PRIMARY|PRIMARY|PRIMARY|PRIMARY	GOOD|EXS|REPT|TOP|ALT|NONE	PURE|DIP|UNIQ|TOP|PRI|COMP|+VEC	PURE|DIP|UNIQ|TOP|PRI|COMP	PRIMARY	PRIMARY	PRIMARY	keep	7
BASENJICHR10.03	5271	8	8.5136	100	5271	10	10	0.4677	16.45	83.55	0	0	BASENJICHR6.01	BASENJICHR9.01	7.63	15.25	KEEP	0	0	1	416.168	20	14217.4	0.48283	97.8265	0	0	FALSE	FALSE	-1	-1	0	0	0	0	0	0	BASPBJ0116_pilon len=5.271 kb 99.89% 10(+) 32,551,155:32,556,419;	PURE|HAP|PART|NON|PRI|NONE	PURE|DIP|UNIQ|TOP|PRI|COMP|+VEC	PURE|DIP|UNIQ|TOP|PRI|COMP	HPURGE	PRIMARY	PRIMARY	quarantine	1
BASENJICHR10.04	4754	9	9.7148	100	4754	7	14	0.4326	13.59	86.41	0	0	-	-	0	0	KEEP	0	0	1	361.816	16	9614.97	0.43774	74.4501	0	0	FALSE	FALSE	-1	-1	0	0	0	0	0	0	BASPBJ0564_pilon len=4.754 kb 45.04% 10(+) 44,875,209:44,877,350;	PURE|HAP|UNIQ|NON|PRI|NONE	-	-	HPURGE	-	-	quarantine	1
BASENJICHR10.05	4325	39	42.5556	100	4325	63	39	0.4222	0.324	0.139	93.62	5.919	-	-	0	0	KEEP	0	0	1	1091.17	1	43711.9	0.42659	50.3606	0	0	FALSE	FALSE	-1	-1	0	0	0	0	0	0	BASPBJ0532_pilon len=4.325 kb 8.86% 10(+) 4,242,634:4,243,016; Diploidocus:PRIMARY|PRIMARY|PRIMARY|PRIMARY|PRIMARY|PRIMARY	PURE|DIP|UNIQ|NON|PRI|NONE	-	-	PRIMARY	-	-	keep	7
BASENJICHR11.01	74077597	35	36.8289	99.9905	74070534	164168	163127	0.3994	0.1507	5.105	94.06	0.6799	-	-	0	0	KEEP	3	6	1	868.366	37	22436.1	0.40331	99.5003	0	0	FALSE	FALSE	-1	-1	0	188	6	8	575	575	BASPBJ0852_pilon len=74.08 Mb 97.41% 11(+) 29,732:74,389,096; 2.97% 11(-); 0.05% other; Diploidocus:PRIMARY|PRIMARY|PRIMARY|PRIMARY|PRIMARY|PRIMARY	PURE|DIP|UNIQ|TOP|PRI|COMP	-	-	PRIMARY	-	-	keep	7
BASENJICHR11.02	278757	51	52.5553	100	278757	946	882	0.5096	0.012	9.711	72.38	17.89	BASENJISCAFF0473	BASENJISCAFF0572	82.21	811.44	KEEP	8	7	1830	2056.35	210845	273384	0.5147	96.5766	0	0	FALSE	FALSE	-1	-1	0	0	0	0	0	0	RevComp BASPBJ1035_pilon len=278.8 kb 0.80% 11(-) 47,854,528:47,856,764; Diploidocus:PRIMARY|PRIMARY|PRIMARY|PRIMARY|PRIMARY|PRIMARY	GOOD|DIP|REPT|TOP|REP|NONE	GOOD|EXS|REPT|TOP|REP|NONE	GOOD|DIP|REPT|TOP|REP|NONE	PRIMARY	PRIMARY	PRIMARY	keep	7
BASENJICHR11.03	242683	38	37.423	99.9963	242674	561	574	0.3708	10.23	6.593	81.81	1.366	-	-	0	0	KEEP	0	0	2	1170.55	69	25815	0.37266	90.0642	0	0	FALSE	FALSE	-1	-1	0	0	0	0	0	0	BASPBJ0981_pilon len=242.7 kb 117.66% 11(+) 690,739:10,927,394; 66.93% 11(-); Diploidocus:PRIMARY|PRIMARY|PRIMARY|PRIMARY|PRIMARY|PRIMARY	PURE|DIP|UNIQ|NON|ALT|NONE	-	-	PRIMARY	-	-	keep	7
BASENJICHR11.04	23754	122	122.931	100	23754	242	236	0.3969	0.008	0	28.04	71.95	BASENJICHRX.01X	BASENJICHR11.01	37.4	368.33	KEEP	0	0	1	1846.4	105	32230.5	0.38878	98.2974	0	0	FALSE	FALSE	-1	-1	0	0	0	0	0	0	RevComp BASPBJ0421_pilon len=23.75 kb 259.93% 11(-) 9,537,504:11,088,065; 94.02% 11(+); Diploidocus:PRIMARY|PRIMARY|PRIMARY|PRIMARY|PRIMARY|PRIMARY	GOOD|EXS|PART|NON|PRI|NONE	PURE|DIP|UNIQ|TOP|PRI|NONE|+TEL|+VEC	PURE|DIP|UNIQ|TOP|PRI|COMP	PRIMARY	PRIMARY	PRIMARY	keep	7
BASENJICHR11.05	15106	114	104.28	99.9669	15101	142	135	0.3831	0.205	0.8207	19.01	79.97	-	-	0	0	JUNK	0	0	1	462.038	141	14852.7	0.37674	89.7281	0	0	FALSE	FALSE	-1	-1	0	0	0	0	0	0	BASPBJ0423_pilon len=15.11 kb 180.25% 11(+) 9,207,123:11,114,496; 151.81% 11(-); 7.37% other; Diploidocus:COLLAPSED|COLLAPSED|COLLAPSED|COLLAPSED|COLLAPSED|COLLAPSED	GOOD|EXS|UNIQ|NON|PRI|NONE	-	-	COLLAPSED	-	-	repeat	7
BASENJICHR11.06	13894	169	154.287	99.9928	13893	227	218	0.416	0.007197	0	1.605	98.39	-	-	0	0	JUNK	0	0	2	584.805	196	17455.1	0.42392	95.1976	0	0	FALSE	FALSE	-1	-1	0	0	1	0	0	0	RevComp BASPBJ0422_pilon len=13.89 kb 387.30% 11(-) 9,216,653:11,129,600; 293.25% 11(+); Diploidocus:COLLAPSED|COLLAPSED|COLLAPSED|COLLAPSED|COLLAPSED|COLLAPSED	PURE|EXS|UNIQ|NON|ALT|DUPL	-	-	COLLAPSED	-	-	repeat	7
BASENJICHR11.07	13890	0	0.5612	48.9705	6802	4	1	0.376	100	0	0	0	-	-	0	0	JUNK	0	0	2	430.313	33	11166.6	0.38423	69.6841	0	0	FALSE	FALSE	-1	-1	0	0	0	0	0	0	BASPBJ0345_pilon len=13.89 kb 36.52% 11(+) 51,493,568:51,499,907;	LOWX|LOW|UNIQ|NON|ALT|NONE	-	-	LOWCOV	-	-	junk	1
BASENJICHR11.08	10103	18	15.9888	100	10103	15	20	0.3984	0.307	99.69	0	0	BASENJICHR11.01	BASENJICHR15.01	95.06	193.12	HAPLOTIG	0	0	2	764.702	66	29334.9	0.41018	85.452	0	0	FALSE	FALSE	-1	-1	0	0	0	0	0	0	RevComp BASPBJ0344_pilon len=10.1 kb 22.55% 11(-) 9,053,489:11,606,130; 7.24% other;	PURE|HAP|HOMO|NON|ALT|NONE	PURE|DIP|UNIQ|TOP|PRI|COMP	PURE|DIP|UNIQ|TOP|PRI|COMP	HPURGE	PRIMARY	PRIMARY	quarantine	1
BASENJICHR11.09	8933	1	1.4699	99.9664	8930	2	2	0.3361	100	0	0	0	-	-	0	0	JUNK	0	0	1	1.82901	1	29.3362	0.33818	50.0168	0	0	FALSE	FALSE	-1	-1	0	0	0	0	0	0	RevComp BASPBJ0583_pilon len=8.933 kb 66.88% 11(-) 11,435,784:11,443,716;	LOWX|LOW|UNIQ|NON|PRI|NONE	-	-	LOWCOV	-	-	junk	1
BASENJICHR11.10	8037	2	3.279	97.3	7820	6	7	0.386	90.68	9.319	0	0	-	-	0	0	JUNK	0	0	2	587.79	35	17231.4	0.3953	70.8526	0	0	FALSE	FALSE	-1	-1	0	0	0	0	0	0	RevComp BASPBJ0097_pilon len=8.037 kb 58.87% 11(-) 51,463,341:51,468,091;	LOWX|LOW|UNIQ|NON|ALT|NONE	-	-	LOWCOV	-	-	junk	1
BASENJICHR11.11	6711	16	16.045	100	6711	14	15	0.346	0	100	0	0	-	-	0	0	KEEP	0	0	1	663.667	20	20379.8	0.34928	97.816	0	0	FALSE	FALSE	-1	-1	0	0	0	0	0	0	RevComp BASPBJ1203_pilon len=6.711 kb 98.35% 11(-) 30,863,592:30,870,197;	PURE|HAP|UNIQ|NON|PRI|NONE	-	-	HPURGE	-	-	quarantine	1
BASENJICHR11.12	6284	49	49.2358	100	6284	47	42	0.3811	0.207	0	99.79	0	-	-	0	0	KEEP	0	0	2	887.568	65	24877.5	0.37763	97.0438	0	0	FALSE	FALSE	-1	-1	0	0	0	0	0	0	BASPBJ0424_pilon len=6.284 kb 96.98% 11(+) 10,972,407:10,978,650; 86.66% 11(-); Diploidocus:PRIMARY|PRIMARY|PRIMARY|PRIMARY|PRIMARY|PRIMARY	PURE|DIP|UNIQ|NON|ALT|NONE	-	-	PRIMARY	-	-	keep	7
BASENJICHR11.13	5925	49	47.7662	99.9662	5923	38	38	0.4126	0.03376	0.03399	99.93	0	-	-	0	0	KEEP	0	0	2	775.506	53	23149.3	0.43156	89.9135	0	0	FALSE	FALSE	-1	-1	0	0	0	0	0	0	BASPBJ0161_pilon len=5.925 kb 79.14% 11(+) 10,983,967:10,988,661; 57.18% 11(-); Diploidocus:PRIMARY|PRIMARY|PRIMARY|PRIMARY|PRIMARY|PRIMARY	PURE|DIP|UNIQ|NON|ALT|NONE	-	-	PRIMARY	-	-	keep	7
BASENJICHR11.14	5769	21	24.9003	99.8787	5762	4	58	0.3946	7.766	52.69	39.54	0	BASENJICHR8.01	BASENJICHRX.01X	95.2	258.59	REPEAT	0	0	2516	3059.3	106230	124386	0.42694	94.8111	0	0	FALSE	FALSE	-1	-1	0	0	0	0	0	0	RevComp BASPBJ0544_pilon len=5.769 kb 84.71% 11(-) 58,517,707:58,522,598; Diploidocus:PRIMARY|PRIMARY|PRIMARY|PRIMARY|PRIMARY|PRIMARY	GOOD|HAP|REPT|NON|REP|NONE	PURE|DIP|UNIQ|TOP|PRI|COMP|+VEC	PURE|DIP|UNIQ|TOP|PRI|NONE|+TEL|+VEC	PRIMARY	PRIMARY	PRIMARY	keep	7
BASENJICHR11.15	5493	0	0.2694	26.9434	1480	1	0	0.3283	100	0	0	0	-	-	0	0	JUNK	0	0	2	1672.36	32	50423.1	0.36337	75.9283	0	0	FALSE	FALSE	-1	-1	0	0	0	0	0	0	RevComp BASPBJ0418_pilon len=5.493 kb 72.35% 11(-) 11,421,642:11,425,622;	LOWX|LOW|UNIQ|NON|ALT|NONE	-	-	LOWCOV	-	-	junk	1
BASENJICHR11.16	5278	20	17.7006	99.9242	5274	1	37	0.4058	6.082	93.92	0	0	BASENJICHR9.01	BASENJICHR11.01	89.28	743.39	KEEP	0	0	2444	2682.77	100683	110586	0.42175	93.3549	0	0	FALSE	FALSE	-1	-1	0	0	0	0	0	0	RevComp BASPBJ0507_pilon len=5.278 kb 83.63% 11(-) 47,610,285:47,614,624; 64.78% other;	PURE|HAP|REPT|NON|REP|NONE	PURE|DIP|UNIQ|TOP|PRI|COMP	PURE|DIP|UNIQ|TOP|PRI|COMP	HPURGE	PRIMARY	PRIMARY	quarantine	1
BASENJICHR11.17	3818	99	90.5456	99.9738	3817	1	166	0.3916	0.02619	0.8908	18.23	80.85	-	-	0	0	JUNK	0	0	3045	3450.09	131533	140347	0.39209	95.9916	0	0	FALSE	FALSE	-1	-1	0	0	0	0	0	0	BASPBJ1260_pilon len=3.818 kb 216.61% 11(+) 35,999,154:42,773,594; 151.18% other; Diploidocus:COLLAPSED|COLLAPSED|COLLAPSED|COLLAPSED|COLLAPSED|COLLAPSED	PURE|EXS|UNIQ|NON|REP|NONE	-	-	COLLAPSED	-	-	repeat	7
BASENJICHR11.18	3183	1	1.0716	100	3183	0	2	0.2887	100	0	0	0	-	-	0	0	JUNK	0	0	1	1.43522	0	21.9721	0.29281	35.5084	0	0	FALSE	FALSE	-1	-1	0	0	0	0	0	0	RevComp BASPBJ1060_pilon len=3.183 kb 42.60% 11(-) 11,665,732:11,667,095;	LOWX|LOW|UNIQ|NON|PRI|NONE	-	-	LOWCOV	-	-	junk	1
BASENJICHR12.01	72601125	35	36.0346	99.9996	72600860	154584	153759	0.3863	0.008365	5.091	94.85	0.046	-	-	0	0	KEEP	1	0	1	903.184	37	22734.5	0.38988	99.582	655	0	FALSE	FALSE	-1	-1	0	181	5	9	0	0	BASPBJ1302_pilon len=72.6 Mb 99.28% 12(+) 157:72,497,944; 0.06% 12(-); 0.20% other; Diploidocus:PRIMARY|PRIMARY|PRIMARY|PRIMARY|PRIMARY|PRIMARY	PURE|DIP|UNIQ|TOP|PRI|COMP|+VEC	-	-	PRIMARY	-	-	keep	7
BASENJICHR12.02	15680	17	17.1233	100	15680	21	29	0.3737	0	100	0	0	BASENJICHRX.01X	-	3.36	4.57	KEEP	0	0	1	1417.6	21	43166.6	0.37628	99.7572	0	0	FALSE	FALSE	-1	-1	0	0	0	0	0	0	BASPBJ1396_pilon len=15.68 kb 102.03% 12(+) 43,727,615:43,808,067;	PURE|HAP|PART|NON|PRI|NONE	PURE|DIP|UNIQ|TOP|PRI|NONE|+TEL|+VEC	-	HPURGE	PRIMARY	-	quarantine	1
BASENJICHR12.03	7470	10	8.764	100	7470	16	10	0.3713	30.12	69.88	0	0	BASENJICHR12.01	BASENJICHRX.01X	90.27	133.33	KEEP	0	1	2	3112.75	42	122268	0.35462	82.0795	0	0	FALSE	FALSE	-1	-1	0	0	0	0	0	0	RevComp BASPBJ0091_pilon len=7.47 kb 48.78% 12(-) 39,726,352:39,729,799;	GOOD|HAP|HOMO|SEC|ALT|NONE	PURE|DIP|UNIQ|TOP|PRI|COMP|+VEC	PURE|DIP|UNIQ|TOP|PRI|NONE|+TEL|+VEC	HPURGE	PRIMARY	PRIMARY	quarantine	1
BASENJICHR12.04	7148	8	7.295	100	7148	10	5	0.3383	44.49	55.51	0	0	-	-	0	0	KEEP	0	0	1	429.78	17	8268.02	0.34163	92.8812	0	0	FALSE	FALSE	-1	-1	0	0	0	0	0	0	BASPBJ0907_pilon len=7.148 kb 97.61% 12(+) 22,412,575:22,419,570;	GOOD|HAP|UNIQ|NON|PRI|NONE	-	-	HPURGE	-	-	quarantine	1
BASENJICHR12.05	4952	10	9.9525	100	4952	10	8	0.3685	0.121	99.88	0	0	-	-	0	0	KEEP	0	0	1	1369.29	19	40483	0.36753	98.5993	0	0	FALSE	FALSE	-1	-1	0	0	0	0	0	0	BASPBJ0337_pilon len=4.952 kb 99.09% 12(+) 7,034,709:7,039,618;	PURE|HAP|UNIQ|NON|PRI|NONE	-	-	HPURGE	-	-	quarantine	1
BASENJICHR12.06	2000	1	0.6075	60.75	1215	1	0	0.5078	100	0	0	0	-	-	0	0	JUNK	0	0	1041	1296.58	42955	53201.9	0.513	96.0993	0	0	FALSE	FALSE	-1	-1	0	0	0	0	0	0	BASPBJ0229_pilon len=2.0 kb 188.05% 12(+) 21,136,280:35,978,271; 53.40% 12(-); 995.95% other;	LOWX|LOW|UNIQ|NON|REP|NONE	-	-	LOWCOV	-	-	junk	1
BASENJICHR13.01	22267	39	34.1796	99.9147	22248	45	45	0.3802	0.2022	23.47	76.33	0	BASENJICHR8.01	BASENJICHR5.01	86.77	263.04	KEEP	0	0	1	1129.77	32	26850.5	0.37949	73.0363	0	0	FALSE	FALSE	-1	-1	0	0	0	0	0	0	BASPBJ0341_pilon len=22.27 kb 67.28% 13(+) 58,910,096:58,954,667; 8.89% 13(-); Diploidocus:PRIMARY|PRIMARY|PRIMARY|PRIMARY|PRIMARY|PRIMARY	GOOD|DIP|REPT|NON|PRI|NONE	PURE|DIP|UNIQ|TOP|PRI|COMP|+VEC	PURE|DIP|UNIQ|SEC|PRI|COMP|+VEC	PRIMARY	PRIMARY	PRIMARY	keep	7
BASENJICHR13.02	9793	11	10.1929	99.9489	9788	10	11	0.3473	28.78	71.22	0	0	BASENJICHR8.01	-	19.75	19.75	KEEP	0	0	1	1191.77	19	35275.7	0.3575	86.4134	0	0	FALSE	FALSE	-1	-1	0	0	0	0	0	0	BASPBJ1097_pilon len=9.793 kb 87.13% 13(+) 52,866,124:52,874,862;	GOOD|HAP|PART|NON|PRI|NONE	PURE|DIP|UNIQ|TOP|PRI|COMP|+VEC	-	HPURGE	PRIMARY	-	quarantine	1
BASENJICHR13.03	8335	37	37.0254	99.928	8329	30	32	0.4018	0.2519	0	99.75	0	-	-	0	0	KEEP	0	0	3	683.101	85	26470.2	0.41488	81.3816	0	0	FALSE	FALSE	-1	-1	0	0	0	0	0	0	BASPBJ1092_pilon len=8.335 kb 75.67% 13(+) 58,918,643:58,924,958; Diploidocus:PRIMARY|PRIMARY|PRIMARY|PRIMARY|PRIMARY|PRIMARY	PURE|DIP|UNIQ|NON|REP|NONE	-	-	PRIMARY	-	-	keep	7
BASENJICHR13.04	6039	13	11.3605	100	6039	28	1	0.4063	24.57	75.43	0	0	BASENJICHR5.01	BASENJICHRX.01X	96.03	229.08	HAPLOTIG	0	0	2360	2726.71	95136	106884	0.44378	88.0758	0	0	FALSE	FALSE	-1	-1	0	0	0	0	0	0	RevComp BASPBJ0158_pilon len=6.039 kb 81.62% 13(-) 28,110,673:28,115,612; 170.23% other;	GOOD|HAP|HOMO|NON|REP|NONE	PURE|DIP|UNIQ|TOP|PRI|COMP|+VEC	PURE|DIP|UNIQ|TOP|PRI|NONE|+TEL|+VEC	HPURGE	PRIMARY	PRIMARY	quarantine	1
BASENJICHR13.05	5495	12	11.3438	99.9636	5493	7	14	0.3791	4.222	95.78	0	0	BASENJICHR8.01	-	30.56	30.56	KEEP	0	0	1	18.2845	22	558.615	0.37689	95.4654	0	0	FALSE	FALSE	-1	-1	0	0	0	0	0	0	RevComp BASPBJ0709_pilon len=5.495 kb 98.76% 13(-) 62,246,859:62,252,302;	PURE|HAP|PART|NON|PRI|NONE	PURE|DIP|UNIQ|TOP|PRI|COMP|+VEC	-	HPURGE	PRIMARY	-	quarantine	1
BASENJICHR13.06	5380	13	18.9351	100	5380	0	56	0.3971	4.033	66.11	29.85	0	BASENJICHRX.01X	BASENJICHR5.01	96.47	231.32	HAPLOTIG	0	0	2442	2668.38	105733	111189	0.4184	93.9671	0	0	FALSE	FALSE	-1	-1	0	0	0	0	0	0	BASPBJ0558_pilon len=5.38 kb 44.81% 13(+) 14,311,450:14,313,865; Diploidocus:PRIMARY|PRIMARY|PRIMARY|PRIMARY|PRIMARY|PRIMARY	GOOD|HAP|HOMO|NON|REP|NONE	PURE|DIP|UNIQ|TOP|PRI|NONE|+TEL|+VEC	PURE|DIP|UNIQ|SEC|PRI|COMP|+VEC	PRIMARY	PRIMARY	PRIMARY	keep	7
BASENJICHR13.07	5372	13	13.8958	100	5372	30	0	0.4176	11.1	88.9	0	0	BASENJICHR9.01	BASENJICHR5.01	99.52	280.03	REPEAT	0	0	2561	2773.83	107432	113469	0.41977	92.7235	0	0	FALSE	FALSE	-1	-1	0	0	0	0	0	0	RevComp BASPBJ1080_pilon len=5.372 kb 83.41% 13(-) 28,111,122:28,115,616; 9.08% other;	PURE|HAP|REPT|NON|REP|NONE	PURE|DIP|UNIQ|TOP|PRI|COMP	PURE|DIP|UNIQ|TOP|PRI|COMP|+VEC	HPURGE	PRIMARY	PRIMARY	quarantine	1
BASENJICHR13.08	5007	27	24.8494	100	5007	71	1	0.395	6.531	42.1	51.37	0	BASENJICHR9.01	BASENJICHRX.01X	76.23	504.43	KEEP	0	0	1695	2106.32	69523	84739.9	0.40763	87.7735	0	0	FALSE	FALSE	-1	-1	0	0	0	0	0	0	RevComp BASPBJ1114_pilon len=5.007 kb 67.71% 13(-) 28,112,224:28,115,616; Diploidocus:PRIMARY|PRIMARY|PRIMARY|PRIMARY|PRIMARY|PRIMARY	GOOD|DIP|REPT|NON|REP|NONE	PURE|DIP|UNIQ|TOP|PRI|COMP	PURE|DIP|UNIQ|TOP|PRI|NONE|+TEL|+VEC	PRIMARY	PRIMARY	PRIMARY	keep	7
BASENJICHR13.09	4861	12	11.0948	100	4861	7	10	0.3459	0.679	99.32	0	0	BASENJICHR8.01	-	2.69	2.69	KEEP	0	0	1	1289.67	17	38334.4	0.3526	97.2699	0	0	FALSE	FALSE	-1	-1	0	0	0	0	0	0	RevComp BASPBJ0239_pilon len=4.861 kb 100.00% 13(-) 60,942,719:60,947,388;	PURE|HAP|PART|NON|PRI|NONE	PURE|DIP|UNIQ|TOP|PRI|COMP|+VEC	-	HPURGE	PRIMARY	-	quarantine	1
BASENJICHR13.10	2716	8	8.6237	100	2716	0	14	0.3814	35.71	64.29	0	0	BASENJICHR29.01	BASENJICHR18.07	93.15	172.68	KEEP	0	1	2859	2929.08	120828	123433	0.3866	98.1784	0	0	FALSE	FALSE	-1	-1	0	0	0	0	0	0	RevComp BASPBJ0232_pilon len=2.716 kb 43.19% 13(-) 14,312,653:14,313,825;	GOOD|HAP|HOMO|SEC|REP|NONE	PURE|DIP|UNIQ|TOP|PRI|COMP	WEAK|HAP|HOMO|SEC|REP|NONE	HPURGE	PRIMARY	PRIMARY	quarantine	1
BASENJICHR14.01	60727891	35	35.8331	99.9989	60727217	127143	127261	0.3847	0.02711	4.844	94.99	0.143	-	-	0	0	KEEP	0	1	1	835.754	37	21279.6	0.38812	99.6677	0	0	FALSE	FALSE	-1	-1	0	104	7	7	0	0	RevComp BASPBJ0149_pilon len=60.73 Mb 99.33% 14(-) 303,996:60,966,641; 0.15% 14(+); 0.17% other; Diploidocus:PRIMARY|PRIMARY|PRIMARY|PRIMARY|PRIMARY|PRIMARY	PURE|DIP|UNIQ|SEC|PRI|COMP	-	-	PRIMARY	-	-	keep	7
BASENJICHR14.02	118040	42	233.361	99.9983	118038	3794	3748	0.4109	2.018	12.9	45.26	39.83	BASENJICHR1.02	BASENJICHR19.01	83.34	2629.42	KEEP	0	1	1	732.728	131	25531.8	0.36754	84.6772	0	0	FALSE	FALSE	-1	-1	0	0	0	0	0	0	BASPBJ0631_pilon len=118.0 kb 17.37% 14(+) 204,733:2,574,588; 6.15% other; Diploidocus:PRIMARY|PRIMARY|PRIMARY|PRIMARY|PRIMARY|PRIMARY	WEAK|DIP|REPT|SEC|PRI|NONE	WEAK|DIP|REPT|TOP|REP|NONE	PURE|DIP|UNIQ|TOP|PRI|COMP	PRIMARY	PRIMARY	PRIMARY	keep	7
BASENJICHR14.03	60196	321	275.479	100	60196	1138	1147	0.4163	0	3.46	3.43	93.11	-	-	0	0	JUNK	0	0	2	410.989	382	15128.3	0.43814	94.5687	0	0	FALSE	FALSE	-1	-1	0	0	0	0	0	0	BASPBJ0637_pilon len=60.2 kb 95.20% 14(+) 219,054:2,573,699; 14.46% 14(-); 113.47% other; Diploidocus:COLLAPSED|COLLAPSED|COLLAPSED|COLLAPSED|COLLAPSED|COLLAPSED	PURE|EXS|UNIQ|NON|ALT|NONE	-	-	COLLAPSED	-	-	repeat	7
BASENJICHR14.04	40771	36	34.7671	99.9951	40769	130	111	0.3869	0.004905	8.619	91.38	0	-	-	0	0	KEEP	0	0	2	456.05	65	17445.7	0.38228	96.2646	0	0	FALSE	FALSE	-1	-1	0	0	0	0	0	0	RevComp BASPBJ1349_pilon len=40.77 kb 10.64% 14(-) 11,603,735:11,608,460; 17.00% other; Diploidocus:PRIMARY|PRIMARY|PRIMARY|PRIMARY|PRIMARY|PRIMARY	PURE|DIP|UNIQ|NON|ALT|NONE	-	-	PRIMARY	-	-	keep	7
BASENJICHR14.05	11646	15	18.9827	100	11646	13	75	0.3417	0	89.58	10.42	0	-	-	0	0	KEEP	0	0	1	789.515	18	24396.5	0.32183	98.6919	0	0	FALSE	FALSE	-1	-1	0	0	0	0	0	0	RevComp BASPBJ0832_pilon len=11.65 kb 91.24% 14(-) 12,333,496:12,344,126;	PURE|HAP|UNIQ|NON|PRI|NONE	-	-	HPURGE	-	-	quarantine	1
BASENJICHR14.06	8952	128	128.137	100	8952	183	192	0.4212	0	0	0.034	99.97	-	-	0	0	JUNK	0	0	2	309.088	193	12700.6	0.43074	89.1105	0	0	FALSE	FALSE	-1	-1	0	0	0	0	0	0	RevComp BASPBJ0148_pilon len=8.952 kb 65.21% 14(-) 292,615:298,458; 41.66% 14(+); Diploidocus:COLLAPSED|COLLAPSED|COLLAPSED|COLLAPSED|COLLAPSED|COLLAPSED	PURE|EXS|UNIQ|NON|ALT|NONE	-	-	COLLAPSED	-	-	repeat	7
BASENJICHR14.07	3050	35	39.503	100	3050	1	88	0.3949	7.344	31.05	35.87	25.74	BASENJICHR27.01	BASENJICHR9.01	84.2	248.39	KEEP	0	0	3250	3515.06	136065	143848	0.39738	97.2553	0	0	FALSE	FALSE	-1	-1	0	0	0	0	0	0	RevComp BASPBJ0439_pilon len=3.05 kb 67.44% 14(-) 12,220,753:12,222,816; 66.75% other; Diploidocus:PRIMARY|PRIMARY|PRIMARY|PRIMARY|PRIMARY|PRIMARY	WEAK|DIP|HOMO|NON|REP|NONE	PURE|DIP|UNIQ|TOP|PRI|COMP	PURE|DIP|UNIQ|TOP|PRI|COMP	PRIMARY	PRIMARY	PRIMARY	keep	7
BASENJICHR14.08	2252	16	14.8814	99.778	2247	0	29	0.3959	18.96	72.11	8.925	0	BASENJICHR4.01	BASENJICHR22.01	37.92	107.68	KEEP	0	0	4067	4088.18	161699	161091	0.39831	95.7772	0	0	FALSE	FALSE	-1	-1	0	0	0	0	0	0	RevComp BASPBJ0260_pilon len=2.252 kb 162.43% 14(-) 12,220,841:26,990,347; 86.19% other;	GOOD|HAP|PART|NON|REP|NONE	PURE|DIP|UNIQ|TOP|PRI|COMP|+VEC	PURE|DIP|UNIQ|TOP|PRI|COMP	HPURGE	PRIMARY	PRIMARY	quarantine	1
BASENJICHR14.09	2149	16	16.4723	100	2149	11	20	0.3902	3.025	96.98	0	0	BASENJICHR5.01	BASENJICHR14.01	97.07	490.6	REPEAT	0	0	5	557.53	525	15668.6	0.3853	100	0	0	FALSE	FALSE	-1	-1	0	0	0	0	0	0	RevComp BASPBJ0582_pilon len=2.149 kb 163.75% 14(-) 290,554:318,030;	PURE|HAP|REPT|NON|REP|NONE	PURE|DIP|UNIQ|TOP|PRI|COMP|+VEC	PURE|DIP|UNIQ|SEC|PRI|COMP	HPURGE	PRIMARY	PRIMARY	quarantine	1
BASENJICHR15.01	64290548	35	35.4721	99.9953	64287542	132794	133222	0.3982	0.02386	5.32	94.58	0.079	-	-	0	0	KEEP	1	0	1	922.809	37	23782.3	0.403	99.5639	0	0	FALSE	FALSE	-1	-1	0	182	2	11	525	525	RevComp BASPBJ0844_pilon len=64.29 Mb 99.21% 15(-) 139:64,190,866; 0.24% 15(+); 0.22% other; Diploidocus:PRIMARY|PRIMARY|PRIMARY|PRIMARY|PRIMARY|PRIMARY	PURE|DIP|UNIQ|TOP|PRI|COMP	-	-	PRIMARY	-	-	keep	7
BASENJICHR15.02	7714	6	6.2646	99.9481	7710	4	27	0.4269	69.99	30.01	0	0	BASENJICHR15.01	BASENJICHRX.01X	75.64	131.63	KEEP	0	1	567	2249.57	19018	83487.3	0.42883	94.1988	0	0	FALSE	FALSE	-1	-1	0	0	0	0	0	0	RevComp BASPBJ0698_pilon len=7.714 kb 34.90% 15(-) 34,959,056:34,961,754; 120.21% other;	GOOD|LOW|HOMO|SEC|REP|NONE	PURE|DIP|UNIQ|TOP|PRI|COMP	PURE|DIP|UNIQ|TOP|PRI|NONE|+TEL|+VEC	HPURGE	PRIMARY	PRIMARY	quarantine	1
BASENJICHR15.03	6168	9	8.8199	100	6168	12	18	0.3752	31.58	68.42	0	0	BASENJICHR10.02	BASENJICHR3.01	98.59	181	HAPLOTIG	0	0	3	1170.24	154	39526	0.3763	90.3289	0	0	FALSE	FALSE	-1	-1	0	0	0	0	0	0	RevComp BASPBJ0094_pilon len=6.168 kb 56.71% 15(-) 49,454:52,998;	GOOD|HAP|HOMO|NON|REP|NONE	GOOD|EXS|REPT|TOP|ALT|NONE	PURE|DIP|UNIQ|TOP|PRI|COMP|+VEC	HPURGE	PRIMARY	PRIMARY	quarantine	1
BASENJICHR15.04	4444	1	0.9118	91.1791	4052	0	2	0.3683	100	0	0	0	-	-	0	0	JUNK	0	0	1	681.183	0	20701.6	0.37331	43.8207	0	0	FALSE	FALSE	-1	-1	0	0	0	0	0	0	RevComp BASPBJ0355_pilon len=4.444 kb 47.12% 15(-) 17,154,387:17,156,515;	LOWX|LOW|UNIQ|NON|PRI|NONE	-	-	LOWCOV	-	-	junk	1
BASENJICHR15.05	3257	8	8.4912	100	3257	9	4	0.389	45.44	54.56	0	0	BASENJICHR15.01	BASENJICHR15.02	99.57	181.76	HAPLOTIG	0	0	2	939.19	28	27905.4	0.39269	83.3179	0	0	FALSE	FALSE	-1	-1	0	0	0	0	0	0	RevComp BASPBJ0180_pilon len=3.257 kb 90.97% 15(-) 34,958,492:34,961,461;	GOOD|HAP|HOMO|NON|ALT|NONE	PURE|DIP|UNIQ|TOP|PRI|COMP	GOOD|LOW|HOMO|SEC|REP|NONE	HPURGE	PRIMARY	HPURGE	quarantine	1
BASENJICHR16.01	59913470	35	36.3269	99.9437	59879764	127096	127310	0.407	0.1542	5.541	93.16	1.141	-	-	0	0	KEEP	10	2	1	832.423	37	21047.2	0.41199	99.4465	0	0	FALSE	FALSE	-1	-1	0	101	6	6	1225	1225	RevComp BASPBJ0408_pilon len=59.91 Mb 88.42% 16(-) 92,861:59,434,906; 9.29% 16(+); 0.15% other; Diploidocus:PRIMARY|PRIMARY|PRIMARY|PRIMARY|PRIMARY|PRIMARY	PURE|DIP|UNIQ|TOP|PRI|COMP	-	-	PRIMARY	-	-	keep	7
BASENJICHR16.02	159259	22	22.6539	99.4851	158439	232	240	0.5351	8.508	51.35	40.14	0	BASENJICHR16.01	-	99.99	105.79	HAPLOTIG	0	0	2	512.813	57	15101.7	0.57257	86.5078	0	0	FALSE	FALSE	-1	-1	0	0	0	0	0	0	BASPBJ0021_pilon len=159.3 kb 88.53% 16(+) 160,895:308,889; 1.75% 16(-); 39.56% other; Diploidocus:PRIMARY|PRIMARY|PRIMARY|PRIMARY|PRIMARY|PRIMARY	GOOD|HAP|HAPL|NON|ALT|NONE	PURE|DIP|UNIQ|TOP|PRI|COMP	-	PRIMARY	PRIMARY	-	keep	7
BASENJICHR16.03	49313	60	60.5366	99.9858	49306	249	230	0.5551	1.257	15.5	44.21	39.04	BASENJICHR16.01	BASENJICHR11.01	84.8	158.06	KEEP	0	0	1	412.717	48	6322.57	0.57857	74.4963	0	0	FALSE	FALSE	-1	-1	0	0	0	0	0	0	RevComp BASPBJ1067_pilon len=49.31 kb 93.86% 16(-) 1,200,953:10,542,937; Diploidocus:PRIMARY|PRIMARY|PRIMARY|PRIMARY|PRIMARY|PRIMARY	WEAK|DIP|HOMO|NON|PRI|NONE	PURE|DIP|UNIQ|TOP|PRI|COMP	PURE|DIP|UNIQ|TOP|PRI|COMP	PRIMARY	PRIMARY	PRIMARY	keep	7
BASENJICHR16.04	46872	50	53.9322	100	46872	204	208	0.4679	0.083	6.663	66	27.26	BASENJICHR16.01	BASENJICHR16.14	92.43	444.56	KEEP	0	2	2	644.98	127	18312.6	0.48526	83.5568	0	0	FALSE	FALSE	-1	-1	0	0	0	0	0	0	RevComp BASPBJ0041_pilon len=46.87 kb 207.12% 16(-) 50,843,741:59,492,883; 51.16% 16(+); Diploidocus:PRIMARY|PRIMARY|PRIMARY|PRIMARY|PRIMARY|PRIMARY	GOOD|DIP|REPT|SEC|ALT|NONE	PURE|DIP|UNIQ|TOP|PRI|COMP	GOOD|DIP|REPT|SEC|PRI|NONE	PRIMARY	PRIMARY	PRIMARY	keep	7
BASENJICHR16.05	33282	101	102.931	99.994	33280	382	380	0.4625	0.117	0.006	27.53	72.35	BASENJICHR16.01	BASENJICHR16.04	95.5	603.38	REPEAT	0	0	1	632.433	109	19131.8	0.47647	76.3862	0	0	FALSE	FALSE	-1	-1	0	0	0	0	0	0	RevComp BASPBJ1237_pilon len=33.28 kb 77.98% 16(-) 54,114,383:59,546,153; 75.45% 16(+); 5.23% other; Diploidocus:PRIMARY|PRIMARY|PRIMARY|PRIMARY|PRIMARY|PRIMARY	GOOD|EXS|REPT|NON|PRI|NONE	PURE|DIP|UNIQ|TOP|PRI|COMP	GOOD|DIP|REPT|SEC|ALT|NONE	PRIMARY	PRIMARY	PRIMARY	keep	7
BASENJICHR16.06	31006	10	11.7814	100	31006	33	35	0.581	47.9	45.74	6.354	0	BASENJICHR16.01	-	99.85	108.44	HAPLOTIG	0	0	1	350.012	34	10407.2	0.60637	58.1762	0	0	FALSE	FALSE	-1	-1	0	0	1	0	0	0	BASPBJ0286_pilon len=31.01 kb 54.56% 16(+) 92,834:109,340;	WEAK|LOW|HAPL|NON|PRI|DUPL	PURE|DIP|UNIQ|TOP|PRI|COMP	-	HPURGE	PRIMARY	-	quarantine	1
BASENJICHR16.07	24243	88	89.7927	99.9505	24231	212	163	0.4211	0.0495	0.08696	2.781	97.08	-	-	0	0	JUNK	0	0	1	735.775	95	20064.3	0.41002	69.2076	0	0	FALSE	FALSE	-1	-1	0	0	0	0	0	0	BASPBJ0292_pilon len=24.24 kb 60.93% 16(+) 1,784:22,170; 7.58% other; Diploidocus:COLLAPSED|COLLAPSED|COLLAPSED|COLLAPSED|COLLAPSED|COLLAPSED	PURE|EXS|UNIQ|NON|PRI|NONE	-	-	COLLAPSED	-	-	repeat	7
BASENJICHR16.08	19629	4	4.6202	91.8692	18033	9	9	0.3821	75.06	24.94	0	0	BASENJICHR16.01	BASENJICHRX.01X	99.96	711.06	REPEAT	0	0	4	495.285	87	14368.7	0.37521	75.0803	0	0	FALSE	FALSE	-1	-1	0	0	0	0	0	0	RevComp BASPBJ1348_pilon len=19.63 kb 130.95% 16(-) 1,677,829:13,869,103; 36.76% 16(+);	GOOD|LOW|REPT|NON|REP|NONE	PURE|DIP|UNIQ|TOP|PRI|COMP	PURE|DIP|UNIQ|TOP|PRI|NONE|+TEL|+VEC	HPURGE	PRIMARY	PRIMARY	quarantine	1
BASENJICHR16.09	17309	116	127.073	99.9653	17303	195	178	0.3871	0.1506	0	1.248	98.6	-	-	0	0	JUNK	0	0	1	387.519	124	10122	0.36311	89.4868	0	0	FALSE	FALSE	-1	-1	0	0	0	0	0	0	RevComp BASPBJ1321_pilon len=17.31 kb 163.95% 16(-) 1,275,969:10,595,933; Diploidocus:COLLAPSED|COLLAPSED|COLLAPSED|COLLAPSED|COLLAPSED|COLLAPSED	PURE|EXS|UNIQ|NON|PRI|NONE	-	-	COLLAPSED	-	-	repeat	7
BASENJICHR16.10	11162	0	1.2698	39.5807	4418	3	2	0.381	100	0	0	0	-	-	0	0	JUNK	0	0	2	408.781	11	12263	0.38165	51.4817	0	0	FALSE	FALSE	-1	-1	0	0	0	0	0	0	BASPBJ0937_pilon len=11.16 kb 37.56% 16(+) 13,856,806:13,861,011;	LOWX|LOW|UNIQ|NON|ALT|NONE	-	-	LOWCOV	-	-	junk	1
BASENJICHR16.11	10537	28	28.5317	99.8576	10522	41	37	0.4934	0.1903	23.57	76.24	0	BASENJICHR16.01	BASENJICHR21.01	95.28	606.68	REPEAT	0	0	1	175.726	78	5716.36	0.50033	87.5464	0	0	FALSE	FALSE	-1	-1	0	0	0	0	0	0	RevComp BASPBJ0051_pilon len=10.54 kb 75.46% 16(-) 1,354,931:1,498,640; Diploidocus:PRIMARY|PRIMARY|PRIMARY|PRIMARY|PRIMARY|PRIMARY	GOOD|DIP|REPT|NON|PRI|NONE	PURE|DIP|UNIQ|TOP|PRI|COMP	PURE|DIP|UNIQ|SEC|PRI|COMP|+VEC	PRIMARY	PRIMARY	PRIMARY	keep	7
BASENJICHR16.12	10100	14	14.4282	100	10100	6	20	0.545	0.129	99.87	0	0	BASENJICHR16.01	-	24.24	24.24	KEEP	0	0	1	194.758	14	5557.01	0.55505	89.051	0	0	FALSE	FALSE	-1	-1	0	0	0	0	0	0	RevComp BASPBJ0781_pilon len=10.1 kb 24.25% 16(-) 6,766,074:6,768,549;	PURE|HAP|PART|NON|PRI|NONE	PURE|DIP|UNIQ|TOP|PRI|COMP	-	HPURGE	PRIMARY	-	quarantine	1
BASENJICHR16.13	10069	96	87.2715	100	10069	83	87	0.4272	0	0	33.73	66.27	BASENJICHR16.01	BASENJICHR36.01	99.76	598.08	REPEAT	0	0	1	1122.71	111	28723.7	0.43887	76.0032	0	0	FALSE	FALSE	-1	-1	0	0	0	0	0	0	RevComp BASPBJ1225_pilon len=10.07 kb 82.45% 16(-) 1,290,800:10,602,890; Diploidocus:PRIMARY|PRIMARY|PRIMARY|PRIMARY|PRIMARY|PRIMARY	GOOD|EXS|REPT|NON|PRI|NONE	PURE|DIP|UNIQ|TOP|PRI|COMP	PURE|DIP|UNIQ|SEC|PRI|COMP|+VEC	PRIMARY	PRIMARY	PRIMARY	keep	7
BASENJICHR16.14	9823	29	26.7294	100	9823	60	62	0.4725	11.53	9.295	79.17	0	BASENJICHR16.01	BASENJICHR16.04	88.27	353.41	KEEP	0	1	1	160.154	132	7111.81	0.46768	88.6394	0	0	FALSE	FALSE	-1	-1	0	0	0	0	0	0	BASPBJ0114_pilon len=9.823 kb 192.80% 16(+) 54,081,746:59,309,447; 181.46% 16(-); Diploidocus:PRIMARY|PRIMARY|PRIMARY|PRIMARY|PRIMARY|PRIMARY	GOOD|DIP|REPT|SEC|PRI|NONE	PURE|DIP|UNIQ|TOP|PRI|COMP	GOOD|DIP|REPT|SEC|ALT|NONE	PRIMARY	PRIMARY	PRIMARY	keep	7
BASENJICHR16.15	6645	45	44.6981	99.8194	6633	34	25	0.4598	0.2555	0.01497	99.73	0	-	-	0	0	KEEP	0	0	2	515.427	77	15662.9	0.46381	78.9847	0	0	FALSE	FALSE	-1	-1	0	0	0	0	0	0	BASPBJ0356_pilon len=6.645 kb 48.70% 16(+) 54,029,662:54,033,062; Diploidocus:PRIMARY|PRIMARY|PRIMARY|PRIMARY|PRIMARY|PRIMARY	PURE|DIP|UNIQ|NON|ALT|NONE	-	-	PRIMARY	-	-	keep	7
BASENJICHR16.17	5661	13	13.3148	100	5661	13	11	0.339	0.035	99.97	0	0	-	-	0	0	KEEP	0	0	1	265.623	17	7327.83	0.33757	100	0	0	FALSE	FALSE	-1	-1	0	0	0	0	0	0	BASPBJ0304_pilon len=5.661 kb 100.00% 16(+) 38,986,561:38,992,236;	PURE|HAP|UNIQ|NON|PRI|NONE	-	-	HPURGE	-	-	quarantine	1
BASENJICHR16.18	5235	3	3.1568	100	5235	0	6	0.4448	100	0	0	0	-	-	0	0	JUNK	0	0	1	166.05	0	2867.18	0.44202	47.2644	0	0	FALSE	FALSE	-1	-1	0	0	0	0	0	0	BASPBJ0244_pilon len=5.235 kb 106.80% 16(+) 1,323,349:1,771,615;	PURE|LOW|UNIQ|NON|PRI|NONE	-	-	HPURGE	-	-	quarantine	1
BASENJICHR16.19	4899	9	8.6946	99.9796	4898	7	8	0.3867	8.145	91.86	0	0	BASENJICHR16.01	-	8.14	8.14	KEEP	0	0	1	4.01539	18	76.2284	0.39375	91.2374	0	0	FALSE	FALSE	-1	-1	0	0	0	0	0	0	RevComp BASPBJ1316_pilon len=4.899 kb 91.53% 16(-) 48,532,957:48,537,442;	PURE|HAP|PART|NON|PRI|NONE	PURE|DIP|UNIQ|TOP|PRI|COMP	-	HPURGE	PRIMARY	-	quarantine	1
BASENJICHR16.20	4873	65	52.0277	99.9795	4872	45	37	0.4091	24.15	0	38.87	36.98	BASENJICHR16.01	-	23	23	KEEP	0	0	1	1905.41	77	64429.7	0.40242	81.5556	0	0	FALSE	FALSE	-1	-1	0	0	0	0	0	0	BASPBJ0499_pilon len=4.873 kb 87.95% 16(+) 52,720,935:59,132,638; 60.05% other; Diploidocus:PRIMARY|PRIMARY|PRIMARY|PRIMARY|PRIMARY|PRIMARY	WEAK|DIP|PART|NON|PRI|NONE	PURE|DIP|UNIQ|TOP|PRI|COMP	-	PRIMARY	PRIMARY	-	keep	7
BASENJICHR16.21	4870	0	0.3873	32.2382	1570	3	0	0.4025	100	0	0	0	-	-	0	0	JUNK	0	0	1	640.199	0	18683.4	0.45544	48.5343	0	0	FALSE	FALSE	-1	-1	0	0	0	0	0	0	RevComp BASPBJ1335_pilon len=4.87 kb 40.70% 16(-) 1,347,794:1,349,782;	LOWX|LOW|UNIQ|NON|PRI|NONE	-	-	LOWCOV	-	-	junk	1
BASENJICHR16.22	4811	127	109.808	100	4811	84	94	0.4486	0.644	0.166	18.04	81.15	-	-	0	0	JUNK	0	0	1	126.434	80	3948.9	0.44315	88.4848	0	0	FALSE	FALSE	-1	-1	0	0	0	0	0	0	RevComp BASPBJ0749_pilon len=4.811 kb 74.08% 16(-) 1,141,456:10,460,950; 32.30% 16(+); Diploidocus:COLLAPSED|COLLAPSED|COLLAPSED|COLLAPSED|COLLAPSED|COLLAPSED	PURE|EXS|UNIQ|NON|PRI|NONE	-	-	COLLAPSED	-	-	repeat	7
BASENJICHR16.23	4656	4	3.5341	95.146	4430	7	3	0.347	100	0	0	0	-	-	0	0	JUNK	0	0	2	5257.18	112	154518	0.35782	95.9827	0	0	FALSE	FALSE	-1	-1	0	0	0	0	0	0	BASPBJ0248_pilon len=4.656 kb 190.34% 16(+) 50,798,160:54,234,984; 21.71% 16(-);	PURE|LOW|UNIQ|NON|ALT|NONE	-	-	HPURGE	-	-	quarantine	1
BASENJICHR16.24	3744	21	18.2909	100	3744	13	19	0.6036	0.214	99.79	0	0	BASENJICHR16.01	BASENJICHR34.01	99.2	2925.72	REPEAT	0	0	2	4.30608	104	240.047	0.65118	98.6283	0	0	FALSE	FALSE	-1	-1	0	0	0	0	0	0	BASPBJ1236_pilon len=3.744 kb 294.07% 16(+) 47,315,897:59,292,066; 260.66% 16(-); 111.81% other;	PURE|HAP|REPT|NON|ALT|NONE	PURE|DIP|UNIQ|TOP|PRI|COMP	PURE|DIP|UNIQ|TOP|PRI|COMP	HPURGE	PRIMARY	PRIMARY	quarantine	1
BASENJICHR16.25	3524	3	2.7968	96.7934	3411	3	5	0.5148	100	0	0	0	-	-	0	0	JUNK	0	0	2	1.81589	36	59.06	0.52157	88.7078	0	0	FALSE	FALSE	-1	-1	0	0	0	0	0	0	BASPBJ0401_pilon len=3.524 kb 88.34% 16(+) 1,365,522:1,368,633; 19.13% 16(-);	PURE|LOW|UNIQ|NON|ALT|NONE	-	-	HPURGE	-	-	quarantine	1
BASENJICHR16.26	2753	2	1.9016	73.992	2037	3	3	0.3699	100	0	0	0	-	-	0	0	JUNK	0	0	1	15.9168	0	434.595	0.34653	46.0579	0	0	FALSE	FALSE	-1	-1	0	0	0	0	0	0	BASPBJ0454_pilon len=2.753 kb 31.57% 16(+) 10,126,546:10,127,414; 30.98% 16(-);	LOWX|LOW|UNIQ|NON|PRI|NONE	-	-	LOWCOV	-	-	junk	1
BASENJICHR16.27	2728	13	12.6712	100	2728	13	12	0.5754	1.283	98.72	0	0	BASENJICHR16.01	BASENJICHR27.01	99.01	2905.24	REPEAT	0	0	1	2.89822	105	186.223	0.60337	96.114	0	0	FALSE	FALSE	-1	-1	0	0	0	0	0	0	RevComp BASPBJ1224_pilon len=2.728 kb 172.98% 16(-) 10,423,768:10,676,463; 37.39% 16(+);	PURE|HAP|REPT|NON|PRI|NONE	PURE|DIP|UNIQ|TOP|PRI|COMP	PURE|DIP|UNIQ|TOP|PRI|COMP	HPURGE	PRIMARY	PRIMARY	quarantine	1
BASENJICHR16.28	2320	75	75.2681	100	2320	47	40	0.483	0	0	1.336	98.66	-	-	0	0	JUNK	0	0	1	29.6168	75	1048.01	0.49095	100	0	0	FALSE	FALSE	-1	-1	0	0	0	0	0	0	RevComp BASPBJ0420_pilon len=2.32 kb 150.99% 16(-) 1,255,062:10,557,962; Diploidocus:COLLAPSED|COLLAPSED|COLLAPSED|COLLAPSED|COLLAPSED|COLLAPSED	PURE|EXS|UNIQ|NON|PRI|NONE	-	-	COLLAPSED	-	-	repeat	7
BASENJICHR16.29	2000	0	0.3955	39.55	791	0	2	0.3761	100	0	0	0	-	-	0	0	JUNK	0	0	2242	2168.39	92735	89218.8	0.384	100	0	0	FALSE	FALSE	-1	-1	0	0	0	0	0	0	BASPBJ0785_pilon len=2.0 kb 90.10% 16(+) 5,872,037:5,873,835; 27.25% other;	LOWX|LOW|UNIQ|NON|REP|NONE	-	-	LOWCOV	-	-	junk	1
BASENJICHR16.30	2000	2	2.2425	73.9	1478	4	0	0.6925	100	0	0	0	-	-	0	0	JUNK	0	0	3	2.66363	73	80.8632	0.691	100	0	0	FALSE	FALSE	-1	-1	0	0	0	0	0	0	RevComp BASPBJ0823_pilon len=2.0 kb 100.00% 16(-) 13,915,831:13,917,831; 99.30% 16(+);	LOWX|LOW|UNIQ|NON|REP|NONE	-	-	LOWCOV	-	-	junk	1
BASENJICHR16.31	1616	17	15.2283	100	1616	7	14	0.3974	0.557	99.44	0	0	BASENJICHR36.01	-	82.3	82.3	KEEP	0	0	1	5.5805	76	205.694	0.39604	95.283	0	0	FALSE	FALSE	-1	-1	0	0	0	0	0	0	BASPBJ1322_pilon len=1.616 kb 100.00% 16(+) 10,595,991:10,597,606;	PURE|HAP|HAPL|NON|PRI|NONE	PURE|DIP|UNIQ|TOP|PRI|COMP|+VEC	-	HPURGE	PRIMARY	-	quarantine	1
BASENJICHR16.32	1311	89	87.923	100	1311	53	65	0.4433	0	0	2.822	97.18	-	-	0	0	JUNK	0	0	1	470.576	76	14443.2	0.44775	97.6654	0	0	FALSE	FALSE	-1	-1	0	0	0	0	0	0	BASPBJ0880_pilon len=1.311 kb 99.54% 16(+) 54,062,878:54,064,218; Diploidocus:COLLAPSED|COLLAPSED|COLLAPSED|COLLAPSED|COLLAPSED|COLLAPSED	PURE|EXS|UNIQ|NON|PRI|NONE	-	-	COLLAPSED	-	-	repeat	7
BASENJICHR16.33	999	2	1.6887	80.7808	807	1	3	0.4493	100	0	0	0	-	-	0	0	JUNK	0	0	4	7371.64	155	218726	0.45946	100	0	0	FALSE	FALSE	-1	-1	0	0	0	0	0	0	RevComp BASPBJ1033_pilon len=999 bp 282.68% 16(-) 59,112,917:59,427,753;	LOWX|LOW|UNIQ|NON|REP|NONE	-	-	LOWCOV	-	-	junk	1
BASENJICHR17.01	64426804	35	38.0851	99.9837	64416273	143208	144483	0.4243	0.04223	5.837	93.74	0.3799	-	-	0	0	KEEP	2	1	1	854.283	37	22172.3	0.41818	99.5888	64	0	FALSE	FALSE	-1	-1	0	213	4	7	75	75	RevComp BASPBJ1026_pilon len=64.43 Mb 98.73% 17(-) 101:64,282,732; 1.04% 17(+); 0.38% other; Diploidocus:PRIMARY|PRIMARY|PRIMARY|PRIMARY|PRIMARY|PRIMARY	PURE|DIP|UNIQ|TOP|PRI|COMP|+VEC	-	-	PRIMARY	-	-	keep	7
BASENJICHR17.02	109713	69	64.8382	99.9973	109710	442	409	0.4675	1.985	0.003	45.17	52.84	BASENJICHR18.01	BASENJICHR17.01	93.28	109.02	KEEP	0	1	2	1609.89	114	47943.7	0.48088	98.1429	0	0	FALSE	FALSE	-1	-1	0	0	0	0	0	0	BASPBJ1295_pilon len=109.7 kb 76.96% 17(+) 21,461,674:21,623,361; 0.79% 17(-); 94.22% other; Diploidocus:PRIMARY|PRIMARY|PRIMARY|PRIMARY|PRIMARY|PRIMARY	GOOD|EXS|HOMO|SEC|ALT|NONE	PURE|DIP|UNIQ|TOP|PRI|COMP|+VEC	PURE|DIP|UNIQ|TOP|PRI|COMP|+VEC	PRIMARY	PRIMARY	PRIMARY	keep	7
BASENJICHR17.03	24583	80	81.9395	99.9878	24580	128	97	0.4099	0.1102	0.033	40.64	59.22	BASENJICHR17.01	BASENJICHR17.02	88.56	177.8	KEEP	0	0	2	1529.89	117	32692.7	0.41541	69.9149	0	0	FALSE	FALSE	-1	-1	0	0	0	0	0	0	RevComp BASPBJ0738_pilon len=24.58 kb 137.77% 17(-) 21,485,738:21,634,588; 200.74% other; Diploidocus:PRIMARY|PRIMARY|PRIMARY|PRIMARY|PRIMARY|PRIMARY	GOOD|EXS|HOMO|NON|ALT|NONE	PURE|DIP|UNIQ|TOP|PRI|COMP|+VEC	GOOD|EXS|HOMO|SEC|ALT|NONE	PRIMARY	PRIMARY	PRIMARY	keep	7
BASENJICHR17.04	13358	17	15.2999	98.6525	13178	21	23	0.5767	20.26	71.04	8.699	0	BASENJICHR17.01	-	100	300	REPEAT	0	0	3	92.4589	122	2527.82	0.58909	97.4122	0	0	FALSE	FALSE	-1	-1	0	0	0	0	0	0	RevComp BASPBJ0593_pilon len=13.36 kb 189.61% 17(-) 56,667,271:56,837,597; 99.72% 17(+);	GOOD|HAP|HAPL|NON|REP|NONE	PURE|DIP|UNIQ|TOP|PRI|COMP|+VEC	-	HPURGE	PRIMARY	-	quarantine	1
BASENJICHR17.05	6846	20	20.0153	100	6846	16	17	0.3711	0.015	99.99	0	0	BASENJICHR17.01	-	31.9	31.9	KEEP	0	0	1	2093.66	23	68806.1	0.37394	99.4721	0	0	FALSE	FALSE	-1	-1	0	0	0	0	0	0	RevComp BASPBJ0574_pilon len=6.846 kb 8.94% 17(-) 56,003,414:56,004,027;	PURE|HAP|PART|NON|PRI|NONE	PURE|DIP|UNIQ|TOP|PRI|COMP|+VEC	-	HPURGE	PRIMARY	-	quarantine	1
BASENJICHR17.06	6759	22	20.1076	100	6759	16	20	0.4653	10.37	55.39	34.24	0	BASENJICHR17.01	-	99.97	153.88	HAPLOTIG	0	0	2	223.332	140	6768.94	0.47803	90.4797	0	0	FALSE	FALSE	-1	-1	0	0	0	0	0	0	BASPBJ0825_pilon len=6.759 kb 167.38% 17(+) 21,455,191:21,589,788; Diploidocus:PRIMARY|PRIMARY|PRIMARY|PRIMARY|PRIMARY|PRIMARY	GOOD|HAP|HAPL|NON|ALT|NONE	PURE|DIP|UNIQ|TOP|PRI|COMP|+VEC	-	PRIMARY	PRIMARY	-	keep	7
BASENJICHR17.07	4521	22	22.288	100	4521	16	11	0.4002	0	91.31	8.693	0	-	-	0	0	KEEP	0	0	2688	2948.51	120029	122713	0.39593	98.5095	0	0	FALSE	FALSE	-1	-1	0	0	0	0	0	0	BASPBJ1129_pilon len=4.521 kb 66.87% 17(+) 40,929,157:40,932,199; 43.95% other;	PURE|HAP|UNIQ|NON|REP|NONE	-	-	HPURGE	-	-	quarantine	1
BASENJICHR17.08	4109	0	0.9786	30.421	1250	2	2	0.5121	100	0	0	0	-	-	0	0	JUNK	0	0	1	2.06319	0	52.5342	0.58189	45.2853	0	0	FALSE	FALSE	-1	-1	0	0	0	0	0	0	BASPBJ0023_pilon len=4.109 kb 92.36% 17(+) 56,679,213:56,837,616; 58.21% 17(-);	LOWX|LOW|UNIQ|NON|PRI|NONE	-	-	LOWCOV	-	-	junk	1
BASENJICHR18.01	95953395	35	35.2969	99.9968	95950288	198440	198672	0.4152	0.01466	5.998	93.84	0.152	-	-	0	0	KEEP	4	1	1	897.654	37	23330.6	0.42327	99.6103	58	0	FALSE	FALSE	-1	-1	0	302	5	6	550	550	RevComp BASPBJ0415_pilon len=95.95 Mb 56.78% 18(-) 4,061:55,623,894; 0.52% 18(+); 42.18% other; Diploidocus:PRIMARY|PRIMARY|PRIMARY|PRIMARY|PRIMARY|PRIMARY	PURE|DIP|UNIQ|TOP|PRI|COMP|+VEC	-	-	PRIMARY	-	-	keep	7
BASENJICHR18.02	20778	31	31.5337	99.9711	20772	57	67	0.3709	0.2698	15.4	84.33	0	-	-	0	0	KEEP	0	0	2	717.024	72	19554.5	0.36866	93.7163	0	0	FALSE	FALSE	-1	-1	0	0	0	0	0	0	BASPBJ0032_pilon len=20.78 kb 130.93% 18(+) 40,389,284:40,662,893; 58.00% 18(-); Diploidocus:PRIMARY|PRIMARY|PRIMARY|PRIMARY|PRIMARY|PRIMARY	PURE|DIP|UNIQ|NON|ALT|NONE	-	-	PRIMARY	-	-	keep	7
BASENJICHR18.03	13658	37	31.981	100	13658	40	38	0.3395	0.029	29.53	70.44	0	BASENJICHR18.01	BASENJICHR9.02	41.66	83.29	KEEP	0	0	1	10.5967	38	304.582	0.33841	78.279	0	0	FALSE	FALSE	-1	-1	0	0	0	0	0	0	RevComp BASPBJ1269_pilon len=13.66 kb 79.76% 18(-) 18,823,650:18,834,687; 41.73% other; Diploidocus:PRIMARY|PRIMARY|PRIMARY|PRIMARY|PRIMARY|PRIMARY	GOOD|DIP|PART|NON|PRI|NONE	PURE|DIP|UNIQ|TOP|PRI|COMP|+VEC	GOOD|EXS|PART|SEC|PRI|NONE	PRIMARY	PRIMARY	PRIMARY	keep	7
BASENJICHR18.04	10617	2	4.8919	86.7665	9212	10	12	0.3569	67.51	32.49	0	0	BASENJICHR9.02	-	98.98	113.08	HAPLOTIG	0	0	2	312.622	153	6315.06	0.35236	64.1394	0	0	FALSE	FALSE	-1	-1	0	0	0	0	0	0	RevComp BASPBJ0837_pilon len=10.62 kb 69.59% 18(-) 18,559,634:18,567,086; 69.19% other;	LOWX|LOW|HAPL|NON|ALT|NONE	GOOD|EXS|PART|TOP|PRI|NONE	-	LOWCOV	PRIMARY	-	junk	1
BASENJICHR18.05	8507	95	96.5624	100	8507	100	99	0.4022	0.012	0	0.106	99.88	-	-	0	0	JUNK	0	0	2	199.833	125	7577.3	0.40108	93.2909	0	0	FALSE	FALSE	-1	-1	0	0	0	0	0	0	RevComp BASPBJ0278_pilon len=8.507 kb 76.49% 18(-) 18,575,629:18,582,138; 5.17% other; Diploidocus:COLLAPSED|COLLAPSED|COLLAPSED|COLLAPSED|COLLAPSED|COLLAPSED	PURE|EXS|UNIQ|NON|ALT|NONE	-	-	COLLAPSED	-	-	repeat	7
BASENJICHR18.06	5783	31	34.2926	100	5783	88	70	0.3949	1.833	35.45	49.84	12.88	BASENJICHR18.01	BASENJICHR9.01	60.52	98.65	KEEP	0	0	2	2369.2	66	79177.5	0.39184	69.8975	0	0	FALSE	FALSE	-1	-1	0	0	0	0	0	0	BASPBJ1059_pilon len=5.783 kb 37.42% 18(+) 41,072,862:41,075,047; Diploidocus:PRIMARY|PRIMARY|PRIMARY|PRIMARY|PRIMARY|PRIMARY	WEAK|DIP|HOMO|NON|ALT|NONE	PURE|DIP|UNIQ|TOP|PRI|COMP|+VEC	PURE|DIP|UNIQ|TOP|PRI|COMP	PRIMARY	PRIMARY	PRIMARY	keep	7
BASENJICHR18.07	4741	20	19.4024	97.5533	4625	51	0	0.3858	24.07	47.23	28.71	0	BASENJICHRX.01X	BASENJICHR29.01	69.48	208.23	KEEP	0	0	2631	2855.17	113645	119589	0.39274	96.8823	0	0	FALSE	FALSE	-1	-1	0	0	0	0	0	0	RevComp BASPBJ0668_pilon len=4.741 kb 88.44% 18(-) 5,237,614:5,241,807; Diploidocus:PRIMARY|PRIMARY|PRIMARY|PRIMARY|PRIMARY|PRIMARY	WEAK|HAP|HOMO|NON|REP|NONE	PURE|DIP|UNIQ|TOP|PRI|NONE|+TEL|+VEC	PURE|DIP|UNIQ|TOP|PRI|COMP	PRIMARY	PRIMARY	PRIMARY	keep	7
BASENJICHR18.08	2885	2	2.1244	99.9653	2884	1	2	0.3739	100	0	0	0	-	-	0	0	JUNK	0	0	1	972.196	33	27586.1	0.37088	65.5124	0	0	FALSE	FALSE	-1	-1	0	0	0	0	0	0	RevComp BASPBJ1017_pilon len=2.885 kb 67.24% 18(-) 55,658,057:55,660,121;	LOWX|LOW|UNIQ|NON|PRI|NONE	-	-	LOWCOV	-	-	junk	1
BASENJICHR18.09	2000	0	0	0	0	0	0	0	100	0	0	0	-	-	0	0	KEEP	0	0	803	1029.27	27853	37770.6	0.552	88.9564	0	0	FALSE	FALSE	-1	-1	0	0	0	0	0	0	RevComp BASPBJ1272_pilon len=2.0 kb 20.90% 18(-) 15,951,193:15,951,610; 62.70% other;	LOWX|LOW|UNIQ|NON|REP|NONE	-	-	LOWCOV	-	-	junk	1
BASENJICHR18.10	1806	29	28.3505	100	1806	57	2	0.3951	0.221	44.19	55.59	0	BASENJICHR27.01	BASENJISCAFF0188	88.7	88.7	KEEP	0	0	21	2765.12	336	104433	0.39037	65.9551	0	0	FALSE	FALSE	-1	-1	0	0	0	0	0	0	RevComp BASPBJ0011_pilon len=1.806 kb 20.76% 18(-) 41,368,961:41,369,334; Diploidocus:PRIMARY|PRIMARY|PRIMARY|PRIMARY|PRIMARY|PRIMARY	GOOD|DIP|HOMO|NON|REP|NONE	PURE|DIP|UNIQ|TOP|PRI|COMP	GOOD|HAP|REPT|SEC|REP|NONE	PRIMARY	PRIMARY	KEEP	keep	7
BASENJICHR19.01	54049856	35	40.4778	99.9982	54048888	131106	130757	0.3944	0.002652	4.477	94.99	0.533	-	-	0	0	KEEP	11	9	1	840.499	37	21030	0.38457	99.51	0	0	FALSE	FALSE	-1	-1	0	55	1	2	75	75	BASPBJ0154_pilon len=54.05 Mb 98.68% 19(+) 101:53,741,577; 0.05% 19(-); 0.19% other; Diploidocus:PRIMARY|PRIMARY|PRIMARY|PRIMARY|PRIMARY|PRIMARY	PURE|DIP|UNIQ|TOP|PRI|COMP	-	-	PRIMARY	-	-	keep	7
BASENJICHR19.02	502453	89	93.0402	100	502453	2918	2906	0.4036	0.005	0.575	26.94	72.48	BASENJICHR16.01	BASENJICHR19.01	52.73	136.33	KEEP	0	1	1	966.374	102	27006.9	0.40135	99.2524	0	0	FALSE	FALSE	-1	-1	0	0	0	2	25	25	BASPBJ0752_pilon len=502.5 kb 12.99% 19(+) 19,299,349:19,855,600; 3.55% 19(-); 11.44% other; Diploidocus:PRIMARY|PRIMARY|PRIMARY|PRIMARY|PRIMARY|PRIMARY	GOOD|EXS|HOMO|SEC|PRI|FRAG	PURE|DIP|UNIQ|TOP|PRI|COMP	PURE|DIP|UNIQ|TOP|PRI|COMP	PRIMARY	PRIMARY	PRIMARY	keep	7
BASENJICHR19.03	48614	140	124.048	99.9979	48613	385	340	0.3819	0.05306	0.051	14.49	85.4	-	-	0	0	JUNK	0	0	1	787.497	153	23311.9	0.38308	87.7995	0	0	FALSE	FALSE	-1	-1	0	0	0	0	0	0	RevComp BASPBJ1221_pilon len=48.61 kb 28.91% 19(-) 19,988,886:20,005,626; 4.54% other; Diploidocus:COLLAPSED|COLLAPSED|COLLAPSED|COLLAPSED|COLLAPSED|COLLAPSED	PURE|EXS|UNIQ|NON|PRI|NONE	-	-	COLLAPSED	-	-	repeat	7
BASENJICHR19.04	40046	187	164.24	100	40046	437	438	0.384	0.037	0.002	13.43	86.53	-	-	0	0	JUNK	0	0	2	1470.38	193	41706.6	0.38611	99.078	0	0	FALSE	FALSE	-1	-1	0	0	0	0	0	0	BASPBJ0808_pilon len=40.05 kb 86.22% 19(+) 19,265,611:19,894,896; 1.83% 19(-); 31.54% other; Diploidocus:COLLAPSED|COLLAPSED|COLLAPSED|COLLAPSED|COLLAPSED|COLLAPSED	PURE|EXS|UNIQ|NON|ALT|NONE	-	-	COLLAPSED	-	-	repeat	7
BASENJICHR19.05	35275	29	29.8551	100	35275	70	87	0.503	1.607	39.74	58.65	0	BASENJISCAFF0299	BASENJISCAFF0810	85.25	1070.51	KEEP	0	1	1842	2127.95	203536	252476	0.50166	99.7815	0	0	FALSE	FALSE	-1	-1	0	0	0	0	0	0	BASPBJ0364_pilon len=35.28 kb 9.34% 19(+) 6,056,405:6,059,690; 3.51% other; Diploidocus:PRIMARY|PRIMARY|PRIMARY|PRIMARY|PRIMARY|PRIMARY	GOOD|DIP|REPT|SEC|REP|NONE	GOOD|EXS|REPT|TOP|REP|NONE	GOOD|DIP|REPT|TOP|REP|NONE	PRIMARY	PRIMARY	PRIMARY	keep	7
BASENJICHR19.06	7695	11	12.0728	100	7695	7	41	0.342	0	94.72	5.276	0	-	-	0	0	KEEP	0	0	1	518.24	17	15977.7	0.32865	96.2316	0	0	FALSE	FALSE	-1	-1	0	0	0	0	0	0	BASPBJ1140_pilon len=7.695 kb 92.75% 19(+) 21,148,241:21,155,379;	PURE|HAP|UNIQ|NON|PRI|NONE	-	-	HPURGE	-	-	quarantine	1
BASENJICHR19.07	5988	23	23.3079	100	5988	43	27	0.3837	13.76	42.17	44.07	0	BASENJICHR19.01	BASENJICHR8.01	100	330.86	REPEAT	0	0	3	2.89165	327	328.616	0.39796	99.1278	0	0	FALSE	FALSE	-1	-1	0	0	0	0	0	0	BASPBJ1194_pilon len=5.988 kb 107.88% 19(+) 19,916,507:19,927,879; Diploidocus:PRIMARY|PRIMARY|PRIMARY|PRIMARY|PRIMARY|PRIMARY	WEAK|DIP|REPT|NON|REP|NONE	PURE|DIP|UNIQ|TOP|PRI|COMP	PURE|DIP|UNIQ|TOP|PRI|COMP|+VEC	PRIMARY	PRIMARY	PRIMARY	keep	7
BASENJICHR19.08	5568	22	29.3412	100	5568	6	63	0.4045	0.036	55.84	44.13	0	BASENJICHR9.01	BASENJICHR11.01	57.06	192.58	KEEP	0	0	1966	2542.9	82604	103589	0.43624	89.733	0	0	FALSE	FALSE	-1	-1	0	0	0	0	0	0	RevComp BASPBJ0309_pilon len=5.568 kb 17.06% 19(-) 26,685,476:26,686,430; Diploidocus:PRIMARY|PRIMARY|PRIMARY|PRIMARY|PRIMARY|PRIMARY	GOOD|HAP|HOMO|NON|REP|NONE	PURE|DIP|UNIQ|TOP|PRI|COMP	PURE|DIP|UNIQ|TOP|PRI|COMP	PRIMARY	PRIMARY	PRIMARY	keep	7
BASENJICHR19.09	4864	12	12.0269	100	4864	11	13	0.3218	0.021	99.98	0	0	-	-	0	0	KEEP	0	0	1	336.474	16	6322.41	0.30715	98.1811	0	0	FALSE	FALSE	-1	-1	0	0	0	0	0	0	BASPBJ0320_pilon len=4.864 kb 100.00% 19(+) 33,412,613:33,417,461;	PURE|HAP|UNIQ|NON|PRI|NONE	-	-	HPURGE	-	-	quarantine	1
BASENJICHR19.10	4487	1265	1197.63	99.8886	4482	805	808	0.4005	0.9135	0.2008	0.2228	98.66	-	-	0	0	JUNK	0	0	6	5114.99	1866	76071.9	0.38355	86.1914	0	0	FALSE	FALSE	-1	-1	0	0	0	0	0	0	RevComp BASPBJ1051_pilon len=4.487 kb 15.89% 19(-) 25,081,944:25,082,652; 16.74% other; Diploidocus:COLLAPSED|COLLAPSED|COLLAPSED|COLLAPSED|COLLAPSED|COLLAPSED	PURE|EXS|UNIQ|NON|REP|NONE	-	-	COLLAPSED	-	-	repeat	7
BASENJICHR19.11	1000	0	0.625	49.4	494	1	1	0.3888	100	0	0	0	-	-	0	0	JUNK	0	0	2414	3249.32	94461	130341	0.379	100	0	0	FALSE	FALSE	-1	-1	0	0	0	0	0	0	RevComp BASPBJ0826_pilon len=1000 bp 61.40% 19(-) 23,587,684:23,588,297;	LOWX|LOW|UNIQ|NON|REP|NONE	-	-	LOWCOV	-	-	junk	1
BASENJICHR2.01	83935693	34	36.5304	99.9914	83928450	182007	182986	0.4199	0.009944	6.631	92.22	1.138	-	-	0	0	KEEP	5	3	1	881.866	37	22701.7	0.42977	99.5624	837	0	FALSE	FALSE	-1	-1	0	240	4	15	575	575	RevComp BASPBJ0174_pilon len=83.94 Mb 98.72% 2(-) 114:85,426,708; 1.75% 2(+); 0.01% other; Diploidocus:PRIMARY|PRIMARY|PRIMARY|PRIMARY|PRIMARY|PRIMARY	PURE|DIP|UNIQ|TOP|PRI|COMP|+VEC	-	-	PRIMARY	-	-	keep	7
BASENJICHR2.02	102132	64	89.2325	100	102132	720	735	0.3753	2.422	1.679	48.07	47.83	BASENJICHR1.02	BASENJICHR2.01	99.98	2716.27	REPEAT	0	0	3	624.203	337	21062	0.3846	96.9894	0	0	FALSE	FALSE	-1	-1	0	0	0	0	0	0	RevComp BASPBJ0950_pilon len=102.1 kb 248.24% 2(-) 4,318,356:6,563,492; 34.80% 2(+); 4.20% other; Diploidocus:PRIMARY|PRIMARY|PRIMARY|PRIMARY|PRIMARY|PRIMARY	WEAK|DIP|REPT|NON|REP|NONE	WEAK|DIP|REPT|TOP|REP|NONE	PURE|DIP|UNIQ|TOP|PRI|COMP|+VEC	PRIMARY	PRIMARY	PRIMARY	keep	7
BASENJICHR2.03	40368	41	79.9602	99.9901	40364	299	331	0.3865	0.04491	17.16	60.34	22.46	BASENJICHR2.01	BASENJICHR25.01	85.29	303.18	KEEP	0	0	4	1064.85	417	36940	0.39276	97.7914	0	0	FALSE	FALSE	-1	-1	0	0	0	0	0	0	RevComp BASPBJ1210_pilon len=40.37 kb 304.85% 2(-) 4,297,177:18,385,789; 128.31% 2(+); Diploidocus:PRIMARY|PRIMARY|PRIMARY|PRIMARY|PRIMARY|PRIMARY	GOOD|DIP|REPT|NON|REP|NONE	PURE|DIP|UNIQ|TOP|PRI|COMP|+VEC	PURE|DIP|UNIQ|TOP|PRI|COMP|+VEC	PRIMARY	PRIMARY	PRIMARY	keep	7
BASENJICHR2.04	39570	348	268.971	99.8105	39495	810	888	0.3719	0.1995	4.883	8.992	85.93	-	-	0	0	JUNK	0	0	1	987.198	296	25011.2	0.37806	86.2229	0	0	FALSE	FALSE	-1	-1	0	0	0	0	0	0	RevComp BASPBJ0720_pilon len=39.57 kb 137.19% 2(-) 4,496,972:6,412,941; 83.19% 2(+); 29.30% other; Diploidocus:COLLAPSED|COLLAPSED|COLLAPSED|COLLAPSED|COLLAPSED|COLLAPSED	PURE|EXS|UNIQ|NON|PRI|NONE	-	-	COLLAPSED	-	-	repeat	7
BASENJICHR2.05	38384	12	12.3919	100	38384	36	41	0.3916	5.859	94.14	0	0	BASENJICHR2.01	-	21.57	77.34	KEEP	0	0	1	1131.09	19	33923.7	0.38956	92.7968	0	0	FALSE	FALSE	-1	-1	0	0	0	0	0	0	BASPBJ0893_pilon len=38.38 kb 140.07% 2(+) 36,159,667:36,253,760;	PURE|HAP|PART|NON|PRI|NONE	PURE|DIP|UNIQ|TOP|PRI|COMP|+VEC	-	HPURGE	PRIMARY	-	quarantine	1
BASENJICHR2.06	37244	13	60.2838	100	37244	152	165	0.3859	45.34	13.89	12.97	27.81	BASENJICHR2.01	BASENJICHR25.01	94.23	426.05	KEEP	0	0	1	1268.28	0	33365.6	0.39523	46.2491	0	0	FALSE	FALSE	-1	-1	0	0	0	0	0	0	BASPBJ0199_pilon len=37.24 kb 45.77% 2(+) 4,507,785:6,411,545; 2.20% 2(-); Diploidocus:KEEP|KEEP|KEEP|KEEP|KEEP|KEEP	WEAK|LOW|REPT|NON|PRI|NONE	PURE|DIP|UNIQ|TOP|PRI|COMP|+VEC	PURE|DIP|UNIQ|TOP|PRI|COMP|+VEC	KEEP	PRIMARY	PRIMARY	keep	7
BASENJICHR2.07	30941	78	77.7476	100	30941	165	176	0.4305	0	2.98	36.9	60.12	BASENJICHR2.01	-	100	255.05	REPEAT	0	0	2	1387.31	210	40687.5	0.44203	98.0236	0	0	FALSE	FALSE	-1	-1	0	0	0	0	0	0	BASPBJ0462_pilon len=30.94 kb 139.73% 2(+) 23,177,274:23,255,667; Diploidocus:PRIMARY|PRIMARY|PRIMARY|PRIMARY|PRIMARY|PRIMARY	GOOD|EXS|HAPL|NON|ALT|NONE	PURE|DIP|UNIQ|TOP|PRI|COMP|+VEC	-	PRIMARY	PRIMARY	-	keep	7
BASENJICHR2.08	12842	49	69.7379	98.575	12659	97	109	0.402	1.549	32.25	24.41	41.78	BASENJICHR25.01	BASENJICHR2.01	73.11	137.87	KEEP	0	0	1	1753.69	0	52962	0.41162	47.3393	0	0	FALSE	FALSE	-1	-1	0	0	0	0	0	0	RevComp BASPBJ0836_pilon len=12.84 kb 59.90% 2(-) 4,603,542:5,663,653; 12.35% other; Diploidocus:PRIMARY|PRIMARY|PRIMARY|PRIMARY|PRIMARY|PRIMARY	WEAK|EXS|HOMO|NON|PRI|NONE	PURE|DIP|UNIQ|TOP|PRI|COMP|+VEC	PURE|DIP|UNIQ|TOP|PRI|COMP|+VEC	PRIMARY	PRIMARY	PRIMARY	keep	7
BASENJICHR2.09	12444	97	84.1663	100	12444	95	104	0.4196	0.016	0	29.21	70.77	BASENJICHR25.01	BASENJICHR2.01	52.69	108.51	KEEP	0	0	1	625.524	75	21787.7	0.43194	69.0772	0	0	FALSE	FALSE	-1	-1	0	0	0	0	0	0	BASPBJ1101_pilon len=12.44 kb 114.67% 2(+) 4,608,459:18,387,612; 16.17% 2(-); Diploidocus:PRIMARY|PRIMARY|PRIMARY|PRIMARY|PRIMARY|PRIMARY	GOOD|EXS|HOMO|NON|PRI|NONE	PURE|DIP|UNIQ|TOP|PRI|COMP|+VEC	PURE|DIP|UNIQ|TOP|PRI|COMP|+VEC	PRIMARY	PRIMARY	PRIMARY	keep	7
BASENJICHR2.10	11246	94	92.9492	100	11246	116	102	0.3937	0	0	0.089	99.91	-	-	0	0	JUNK	0	0	2	1645.01	153	49890.1	0.39685	99.5098	0	0	FALSE	FALSE	-1	-1	0	0	0	0	0	0	RevComp BASPBJ0035_pilon len=11.25 kb 189.37% 2(-) 5,008,406:5,320,132; 89.28% 2(+); 39.09% other; Diploidocus:COLLAPSED|COLLAPSED|COLLAPSED|COLLAPSED|COLLAPSED|COLLAPSED	PURE|EXS|UNIQ|NON|ALT|NONE	-	-	COLLAPSED	-	-	repeat	7
BASENJICHR2.11	11016	225	233.734	99.9274	11008	623	190	0.3953	0.2725	1.798	1.425	96.5	-	-	0	0	JUNK	0	0	2	1702.72	113	56005.4	0.3878	58.2257	0	0	FALSE	FALSE	-1	-1	0	0	0	0	0	0	BASPBJ0982_pilon len=11.02 kb 22.47% 2(+) 44,022,326:44,024,800; Diploidocus:COLLAPSED|COLLAPSED|COLLAPSED|COLLAPSED|COLLAPSED|COLLAPSED	PURE|EXS|UNIQ|NON|ALT|NONE	-	-	COLLAPSED	-	-	repeat	7
BASENJICHR2.12	9773	1	1.5184	92.7556	9065	2	1	0.4019	100	0	0	0	-	-	0	0	JUNK	0	0	1	654.011	1	18566.1	0.42096	50.159	0	0	FALSE	FALSE	-1	-1	0	0	0	0	0	0	BASPBJ0142_pilon len=9.773 kb 55.78% 2(+) 65,278,541:65,284,107;	LOWX|LOW|UNIQ|NON|PRI|NONE	-	-	LOWCOV	-	-	junk	1
BASENJICHR2.13	9336	18	18.9668	100	9336	33	20	0.378	24.53	42.67	32.8	0	BASENJICHR25.01	BASENJICHR23.01	99.9	181.61	HAPLOTIG	0	0	3	3183.34	252	43002.9	0.3855	89.3555	0	0	FALSE	FALSE	-1	-1	0	0	0	0	0	0	BASPBJ0010_pilon len=9.336 kb 271.85% 2(+) 4,180,111:6,614,319; 134.48% other; Diploidocus:PRIMARY|PRIMARY|PRIMARY|PRIMARY|PRIMARY|PRIMARY	WEAK|HAP|HOMO|NON|REP|NONE	PURE|DIP|UNIQ|TOP|PRI|COMP|+VEC	PURE|DIP|UNIQ|SEC|PRI|COMP	PRIMARY	PRIMARY	PRIMARY	keep	7
BASENJICHR2.14	7131	16	15.603	100	7131	20	12	0.39	0	100	0	0	-	-	0	0	KEEP	0	0	1	1375.93	18	40600.3	0.39476	97.7903	0	0	FALSE	FALSE	-1	-1	0	0	0	0	0	0	BASPBJ1253_pilon len=7.131 kb 99.37% 2(+) 72,974,784:72,981,518;	PURE|HAP|UNIQ|NON|PRI|NONE	-	-	HPURGE	-	-	quarantine	1
BASENJICHR2.15	6831	7	7.5616	100	6831	7	17	0.4368	50.89	49.11	0	0	BASENJICHR25.01	BASENJICHR17.01	99.5	136.91	HAPLOTIG	0	0	2	6.63248	302	350.475	0.44752	81.9985	0	0	FALSE	FALSE	-1	-1	0	0	0	0	0	0	RevComp BASPBJ0376_pilon len=6.831 kb 329.75% 2(-) 4,618,778:18,395,152; 7.69% 2(+); 36.77% other;	GOOD|LOW|HOMO|NON|ALT|NONE	PURE|DIP|UNIQ|TOP|PRI|COMP|+VEC	PURE|DIP|UNIQ|TOP|PRI|COMP|+VEC	HPURGE	PRIMARY	PRIMARY	quarantine	1
BASENJICHR2.16	5784	44	37.2694	100	5784	54	63	0.3634	5.619	15.09	79.29	0	BASENJICHR2.01	BASENJICHR25.01	99.88	312.83	REPEAT	0	0	3	622.475	421	19205.1	0.36238	98.9927	0	0	FALSE	FALSE	-1	-1	0	0	0	0	0	0	RevComp BASPBJ0719_pilon len=5.784 kb 431.97% 2(-) 4,301,089:6,374,767; 99.93% 2(+); Diploidocus:PRIMARY|PRIMARY|PRIMARY|PRIMARY|PRIMARY|PRIMARY	GOOD|DIP|REPT|NON|REP|NONE	PURE|DIP|UNIQ|TOP|PRI|COMP|+VEC	PURE|DIP|UNIQ|TOP|PRI|COMP|+VEC	PRIMARY	PRIMARY	PRIMARY	keep	7
BASENJICHR2.17	5178	97	87.5315	100	5178	93	98	0.3385	0	3.824	30.05	66.13	BASENJICHR2.01	-	98.9	105.06	HAPLOTIG	0	0	2	3403.59	355	50376.2	0.34705	94.6817	0	0	FALSE	FALSE	-1	-1	0	0	0	0	0	0	BASPBJ1075_pilon len=5.178 kb 375.36% 2(+) 5,048,117:6,509,159; Diploidocus:PRIMARY|PRIMARY|PRIMARY|PRIMARY|PRIMARY|PRIMARY	GOOD|EXS|HAPL|NON|ALT|NONE	PURE|DIP|UNIQ|TOP|PRI|COMP|+VEC	-	PRIMARY	PRIMARY	-	keep	7
BASENJICHR2.18	5082	18	20.1133	99.8623	5075	0	49	0.3868	9.248	60.9	29.85	0	BASENJICHR9.01	BASENJICHR4.01	97.38	639.63	REPEAT	0	0	2594	2888.6	110407	119705	0.39551	94.4818	0	0	FALSE	FALSE	-1	-1	0	0	0	0	0	0	RevComp BASPBJ0237_pilon len=5.082 kb 6.73% 2(-) 44,026,278:44,026,621; Diploidocus:PRIMARY|PRIMARY|PRIMARY|PRIMARY|PRIMARY|PRIMARY	GOOD|HAP|REPT|NON|REP|NONE	PURE|DIP|UNIQ|TOP|PRI|COMP	PURE|DIP|UNIQ|SEC|PRI|COMP|+VEC	PRIMARY	PRIMARY	PRIMARY	keep	7
BASENJICHR2.19	4484	36	35.5977	100	4484	24	31	0.426	0	0.87	99.13	0	-	-	0	0	KEEP	0	0	5	1530.66	377	49507.3	0.43778	96.2091	0	0	FALSE	FALSE	-1	-1	0	0	0	0	0	0	BASPBJ1276_pilon len=4.484 kb 158.32% 2(+) 4,612,142:18,388,557; 10.01% 2(-); 32.02% other; Diploidocus:PRIMARY|PRIMARY|PRIMARY|PRIMARY|PRIMARY|PRIMARY	PURE|DIP|UNIQ|NON|REP|NONE	-	-	PRIMARY	-	-	keep	7
BASENJICHR2.20	4462	1	0.97	96.9969	4328	1	0	0.4225	100	0	0	0	-	-	0	0	JUNK	0	0	1	133.988	0	3999.95	0.4229	28.1785	0	0	FALSE	FALSE	-1	-1	0	0	0	0	0	0	BASPBJ0736_pilon len=4.462 kb 17.12% 2(+) 65,267,682:65,295,479;	LOWX|LOW|UNIQ|NON|PRI|NONE	-	-	LOWCOV	-	-	junk	1
BASENJICHR2.21	2164	0	0	0	0	0	0	0	100	0	0	0	-	-	0	0	KEEP	0	0	2	2.48924	42	53.9729	0.32994	93.4986	0	0	FALSE	FALSE	-1	-1	0	0	0	0	0	0	RevComp BASPBJ0005_pilon len=2.164 kb 92.42% 2(-) 14,459,679:14,461,677; 83.73% other;	LOWX|LOW|UNIQ|NON|ALT|NONE	-	-	LOWCOV	-	-	junk	1
BASENJICHR2.22	2002	3	2.6923	64.6354	1294	7	3	0.3066	100	0	0	0	-	-	0	0	JUNK	0	0	1	647.825	36	34646.4	0.33666	85.9818	0	0	FALSE	FALSE	-1	-1	0	0	0	0	0	0	RevComp BASPBJ0718_pilon len=2.002 kb 99.40% 2(-) 14,459,126:14,460,690; 47.65% other;	PURE|LOW|UNIQ|NON|PRI|NONE	-	-	HPURGE	-	-	quarantine	1
BASENJICHR2.23	705	126	126.584	100	705	75	69	0.4353	0	0	0	100	-	-	0	0	JUNK	0	0	8	568.021	565	20088.2	0.38865	98.2327	0	0	FALSE	FALSE	-1	-1	0	0	0	0	0	0	BASPBJ1108_pilon len=705 bp 458.72% 2(+) 4,655,484:6,494,386; Diploidocus:COLLAPSED|COLLAPSED|COLLAPSED|COLLAPSED|COLLAPSED|COLLAPSED	PURE|EXS|UNIQ|NON|REP|NONE	-	-	COLLAPSED	-	-	repeat	7
BASENJICHR20.01	58423659	34	35.2383	100	58423648	122566	122034	0.435	0.005019	7.872	92	0.123	-	-	0	0	KEEP	2	4	1	902.907	37	23748.3	0.44468	99.6358	178	0	FALSE	FALSE	-1	-1	0	219	4	2	0	0	BASPBJ1291_pilon len=58.42 Mb 98.24% 20(+) 7,810:58,134,056; 0.86% 20(-); 0.13% other; Diploidocus:PRIMARY|PRIMARY|PRIMARY|PRIMARY|PRIMARY|PRIMARY	PURE|DIP|UNIQ|TOP|PRI|COMP|+VEC	-	-	PRIMARY	-	-	keep	7
BASENJICHR20.02	5457	36	31.6544	100	5457	43	25	0.5051	0.568	41.58	57.85	0	BASENJICHR19.01	BASENJICHR20.01	94.1	645.74	KEEP	0	0	1	4.5905	10	997.598	0.53344	52.6791	0	0	FALSE	FALSE	-1	-1	0	0	0	0	0	0	BASPBJ0213_pilon len=5.457 kb 9.36% 20(+) 32,191,052:32,191,566; Diploidocus:PRIMARY|PRIMARY|PRIMARY|PRIMARY|PRIMARY|PRIMARY	GOOD|DIP|REPT|NON|PRI|NONE	PURE|DIP|UNIQ|TOP|PRI|COMP	PURE|DIP|UNIQ|TOP|PRI|COMP|+VEC	PRIMARY	PRIMARY	PRIMARY	keep	7
BASENJICHR20.03	3037	1	1	100	3037	1	0	0.543	100	0	0	0	-	-	0	0	JUNK	0	0	1	7.9193	0	226.408	0.54363	46.7287	0	0	FALSE	FALSE	-1	-1	0	0	0	0	0	0	RevComp BASPBJ1043_pilon len=3.037 kb 56.87% 20(-) 51,790,855:51,792,586;	LOWX|LOW|UNIQ|NON|PRI|NONE	-	-	LOWCOV	-	-	junk	1
BASENJICHR21.01	51097116	35	35.8137	99.9126	51052441	109162	108907	0.3976	0.2012	4.814	94.84	0.1409	-	-	0	0	KEEP	0	1	1	899.317	37	22785.8	0.4017	99.5735	338	0	FALSE	FALSE	-1	-1	0	115	3	6	50	50	BASPBJ1385_pilon len=51.1 Mb 98.88% 21(+) 101:50,770,091; 0.41% 21(-); 0.31% other; Diploidocus:PRIMARY|PRIMARY|PRIMARY|PRIMARY|PRIMARY|PRIMARY	PURE|DIP|UNIQ|SEC|PRI|COMP|+VEC	-	-	PRIMARY	-	-	keep	7
BASENJICHR21.02	2000	3	2.7455	100	2000	3	2	0.3423	100	0	0	0	-	-	0	0	JUNK	0	0	2	82.2776	31	2495.9	0.3425	98.9362	0	0	FALSE	FALSE	-1	-1	0	0	0	0	0	0	BASPBJ0314_pilon len=2.0 kb 98.80% 21(+) 16,757,847:16,759,819;	PURE|LOW|UNIQ|NON|ALT|NONE	-	-	HPURGE	-	-	quarantine	1
BASENJICHR22.01	61547499	36	35.7337	99.9999	61547467	127833	128480	0.3762	0.194	4.872	94.92	0.014	-	-	0	0	KEEP	0	0	1	831.89	37	20812.3	0.37964	99.5341	0	0	FALSE	FALSE	-1	-1	0	54	0	2	75	75	BASPBJ0807_pilon len=61.55 Mb 99.32% 22(+) 48,809:61,413,603; 0.12% 22(-); 0.33% other; Diploidocus:PRIMARY|PRIMARY|PRIMARY|PRIMARY|PRIMARY|PRIMARY	PURE|DIP|UNIQ|NON|PRI|COMP	-	-	PRIMARY	-	-	keep	7
BASENJICHR22.02	47992	289	396.243	99.9958	47990	822	786	0.332	0.01217	0.019	0.723	99.25	-	-	0	0	JUNK	0	0	6	270.066	49	17927.4	0.32872	62.0856	0	0	FALSE	FALSE	-1	-1	0	0	0	0	0	0	RevComp BASPBJ0922_pilon len=47.99 kb 2.74% 22(-) 61,415,644:61,416,876; 2.26% other; Diploidocus:COLLAPSED|COLLAPSED|COLLAPSED|COLLAPSED|COLLAPSED|COLLAPSED	PURE|EXS|UNIQ|NON|REP|NONE	-	-	COLLAPSED	-	-	repeat	7
BASENJICHR22.03	21888	23	64.8054	99.9589	21879	307	287	0.4116	0.1371	55.22	18.54	26.1	BASENJICHR19.01	BASENJICHR8.01	91.02	453.58	KEEP	0	0	1	453.953	0	17131	0.44554	35.8888	0	0	FALSE	FALSE	-1	-1	0	0	0	0	0	0	BASPBJ1107_pilon len=21.89 kb 13.74% 22(+) 11,484:14,674; 22.22% other; Diploidocus:KEEP|KEEP|KEEP|KEEP|KEEP|KEEP	GOOD|HAP|REPT|NON|PRI|NONE	PURE|DIP|UNIQ|TOP|PRI|COMP	PURE|DIP|UNIQ|TOP|PRI|COMP|+VEC	KEEP	PRIMARY	PRIMARY	keep	7
BASENJICHR22.04	19266	86	80.8723	100	19266	199	106	0.295	0.457	11.82	22.95	64.77	BASENJICHR18.01	BASENJICHR10.01	36.71	196.41	KEEP	0	0	106	2086.57	754	2983.79	0.17876	90.5769	0	0	FALSE	FALSE	-1	-1	0	0	0	0	0	0	RevComp BASPBJ0390_pilon len=19.27 kb 20.98% 22(-) 32,369:48,666; 52.35% other; Diploidocus:PRIMARY|PRIMARY|PRIMARY|PRIMARY|PRIMARY|PRIMARY	GOOD|EXS|PART|NON|REP|NONE	PURE|DIP|UNIQ|TOP|PRI|COMP|+VEC	PURE|DIP|UNIQ|TOP|PRI|COMP|+VEC	PRIMARY	PRIMARY	PRIMARY	keep	7
BASENJICHR22.05	7577	83	295.965	99.5645	7544	524	443	0.3288	0.5938	3.076	31.12	65.21	BASENJICHR1.02	BASENJICHR27.01	93.4	1153.72	KEEP	0	0	1	125.795	0	11216.5	0.32968	40.1934	0	0	FALSE	FALSE	-1	-1	0	0	0	0	0	0	RevComp BASPBJ0009_pilon len=7.577 kb 14.62% 22(-) 61,415,849:61,416,876; 9.95% other; Diploidocus:PRIMARY|PRIMARY|PRIMARY|PRIMARY|PRIMARY|PRIMARY	GOOD|EXS|REPT|NON|PRI|NONE	WEAK|DIP|REPT|TOP|REP|NONE	PURE|DIP|UNIQ|TOP|PRI|COMP	PRIMARY	PRIMARY	PRIMARY	keep	7
BASENJICHR22.06	6482	4	4.3278	95.6495	6200	0	8	0.4448	96.65	3.348	0	0	-	-	0	0	JUNK	0	0	2406	2949.7	98144	115274	0.44014	94.3618	0	0	FALSE	FALSE	-1	-1	0	0	0	0	0	0	RevComp BASPBJ0778_pilon len=6.482 kb 69.01% 22(-) 35,261,362:35,265,828;	PURE|LOW|UNIQ|NON|REP|NONE	-	-	HPURGE	-	-	quarantine	1
BASENJICHR22.07	4869	13	12.9427	100	4869	10	11	0.3419	0.288	99.71	0	0	BASENJICHR22.01	-	4.58	4.58	KEEP	0	0	1	105.038	19	3269.43	0.35017	96.2007	0	0	FALSE	FALSE	-1	-1	0	0	0	0	0	0	RevComp BASPBJ0513_pilon len=4.869 kb 99.38% 22(-) 35,251,724:35,256,563;	PURE|HAP|PART|NON|PRI|NONE	PURE|DIP|UNIQ|TOP|PRI|COMP	-	HPURGE	PRIMARY	-	quarantine	1
BASENJICHR22.08	4450	13	12.9508	100	4450	14	10	0.3281	0	100	0	0	-	-	0	0	KEEP	0	0	1	1.9392	19	43.2136	0.32472	96.8354	0	0	FALSE	FALSE	-1	-1	0	0	0	0	0	0	RevComp BASPBJ0678_pilon len=4.45 kb 99.89% 22(-) 21,591,286:21,595,730;	PURE|HAP|UNIQ|NON|PRI|NONE	-	-	HPURGE	-	-	quarantine	1
BASENJICHR22.09	4141	11	11.7225	100	4141	11	9	0.3859	1.352	98.65	0	0	BASENJICHR22.01	BASENJICHR4.01	22.02	44.02	KEEP	0	0	2762	3366.74	124555	136530	0.39725	96.7679	0	0	FALSE	FALSE	-1	-1	0	0	0	0	0	0	BASPBJ1038_pilon len=4.141 kb 96.47% 22(+) 41,953,357:41,957,874; 85.63% other;	PURE|HAP|PART|NON|REP|NONE	PURE|DIP|UNIQ|TOP|PRI|COMP	PURE|DIP|UNIQ|TOP|PRI|COMP|+VEC	HPURGE	PRIMARY	PRIMARY	quarantine	1
BASENJICHR22.10	3224	21	19.3489	99.8139	3218	16	17	0.54	8.375	61.04	30.58	0	BASENJICHR24.01	BASENJICHR31.01	94.76	408.1	KEEP	0	0	4	135.323	516	5888.78	0.54001	83.0832	0	0	FALSE	FALSE	-1	-1	0	0	0	0	0	0	BASPBJ0527_pilon len=3.224 kb 73.29% 22(+) 46,541:48,798; 68.98% other; Diploidocus:PRIMARY|PRIMARY|PRIMARY|PRIMARY|PRIMARY|PRIMARY	GOOD|HAP|REPT|NON|REP|NONE	PURE|DIP|UNIQ|TOP|PRI|COMP|+VEC	PURE|DIP|UNIQ|TOP|PRI|COMP	PRIMARY	PRIMARY	PRIMARY	keep	7
BASENJICHR22.11	2288	156	174.851	100	2288	239	283	0.4129	0	0.087	0	99.91	-	-	0	0	JUNK	0	0	8	1976.62	6056	66978.4	0.41084	98.1432	0	0	FALSE	FALSE	-1	-1	0	0	0	0	0	0	BASPBJ1381_pilon len=2.288 kb 99.91% 22(+) 14,833:17,119; 395.50% other; Diploidocus:COLLAPSED|COLLAPSED|COLLAPSED|COLLAPSED|COLLAPSED|COLLAPSED	PURE|EXS|UNIQ|NON|REP|NONE	-	-	COLLAPSED	-	-	repeat	7
BASENJICHR23.01	52864383	35	36.3033	99.9993	52863991	112318	111680	0.3951	0.03069	4.795	94.52	0.658	-	-	0	0	KEEP	0	1	1	800.157	37	20764.4	0.39989	99.5885	0	0	FALSE	FALSE	-1	-1	0	105	2	10	25	25	BASPBJ0310_pilon len=52.86 Mb 98.51% 23(+) 101:52,294,419; 0.10% 23(-); 0.65% other; Diploidocus:PRIMARY|PRIMARY|PRIMARY|PRIMARY|PRIMARY|PRIMARY	PURE|DIP|UNIQ|SEC|PRI|COMP	-	-	PRIMARY	-	-	keep	7
BASENJICHR23.02	6174	7	8.7383	99.1578	6122	17	13	0.3933	50.5	49.5	0	0	BASENJICHR23.01	BASENJICHR2.01	75.69	106.77	KEEP	0	0	2	1152.78	57	45231.3	0.3965	96.7632	0	0	FALSE	FALSE	-1	-1	0	0	0	0	0	0	BASPBJ0008_pilon len=6.174 kb 128.05% 23(+) 15,412,014:17,915,664; 26.74% 23(-); 101.20% other;	GOOD|LOW|HOMO|NON|ALT|NONE	PURE|DIP|UNIQ|TOP|PRI|COMP	PURE|DIP|UNIQ|TOP|PRI|COMP|+VEC	HPURGE	PRIMARY	PRIMARY	quarantine	1
BASENJICHR23.03	5323	5	10.4278	100	5323	28	5	0.3836	68.91	21.42	9.675	0	BASENJICHR23.01	BASENJICHR21.01	68.74	95.13	KEEP	0	0	2	1582.19	29	56254.5	0.36333	70.6815	0	0	FALSE	FALSE	-1	-1	0	0	0	0	0	0	RevComp BASPBJ0934_pilon len=5.323 kb 50.27% 23(-) 29,521,651:29,524,333;	GOOD|LOW|HOMO|NON|ALT|NONE	PURE|DIP|UNIQ|TOP|PRI|COMP	PURE|DIP|UNIQ|SEC|PRI|COMP|+VEC	HPURGE	PRIMARY	PRIMARY	quarantine	1
BASENJICHR24.01	47805394	34	35.3909	99.997	47803948	101147	101160	0.436	0.007972	7.693	92.11	0.19	-	-	0	0	KEEP	1	0	1	871.509	37	22598.8	0.44562	99.6277	244	0	FALSE	FALSE	-1	-1	0	155	1	5	25	25	BASPBJ0327_pilon len=47.81 Mb 99.41% 24(+) 14,407:47,698,470; 0.11% 24(-); 0.22% other; Diploidocus:PRIMARY|PRIMARY|PRIMARY|PRIMARY|PRIMARY|PRIMARY	PURE|DIP|UNIQ|TOP|PRI|COMP|+VEC	-	-	PRIMARY	-	-	keep	7
BASENJICHR24.02	114754	49	61.2101	99.9991	114753	449	617	0.5092	0.2309	8.788	56.79	34.19	BASENJISCAFF0473	BASENJISCAFF0664	70.04	553.28	KEEP	0	1	1872	2209.03	214830	283777	0.51343	98.1164	0	0	FALSE	FALSE	-1	-1	0	0	0	0	0	0	BASPBJ0638_pilon len=114.8 kb 0.43% 24(+) 34,137,060:34,137,549; Diploidocus:PRIMARY|PRIMARY|PRIMARY|PRIMARY|PRIMARY|PRIMARY	GOOD|DIP|REPT|SEC|REP|NONE	GOOD|EXS|REPT|TOP|REP|NONE	GOOD|HAP|REPT|TOP|REP|NONE	PRIMARY	PRIMARY	PRIMARY	keep	7
BASENJICHR25.01	51434091	35	35.8316	99.998	51433049	108294	108663	0.4076	0.004977	5.384	94.39	0.22	-	-	0	0	KEEP	3	3	1	854.091	37	21684.5	0.4142	99.6781	573	0	FALSE	FALSE	-1	-1	0	101	3	7	25	25	BASPBJ0076_pilon len=51.43 Mb 99.56% 25(+) 10,757:51,628,839; 0.69% other; Diploidocus:PRIMARY|PRIMARY|PRIMARY|PRIMARY|PRIMARY|PRIMARY	PURE|DIP|UNIQ|TOP|PRI|COMP|+VEC	-	-	PRIMARY	-	-	keep	7
BASENJICHR25.02	8411	0	0.2372	23.7189	1995	1	1	0.455	100	0	0	0	-	-	0	0	JUNK	0	0	1	254.556	0	7695.41	0.40269	36.0048	0	0	FALSE	FALSE	-1	-1	0	0	0	0	0	0	RevComp BASPBJ0328_pilon len=8.411 kb 20.62% 25(-) 45,040,874:45,042,617;	LOWX|LOW|UNIQ|NON|PRI|NONE	-	-	LOWCOV	-	-	junk	1
BASENJICHR26.01	37987315	34	34.5258	99.8847	37943525	78443	78246	0.447	0.3067	8.589	90.94	0.1618	-	-	0	0	KEEP	1	2	1	966.044	37	25345.8	0.45514	99.4336	0	0	FALSE	FALSE	-1	-1	0	130	4	5	2818	2818	RevComp BASPBJ0150_pilon len=37.99 Mb 98.17% 26(-) 146:38,964,652; 1.67% 26(+); 0.16% other; Diploidocus:PRIMARY|PRIMARY|PRIMARY|PRIMARY|PRIMARY|PRIMARY	PURE|DIP|UNIQ|TOP|PRI|COMP	-	-	PRIMARY	-	-	keep	7
BASENJICHR26.02	1245779	32	35.0922	99.8456	1243855	2981	3163	0.4402	3.823	35.56	52.38	8.231	BASENJICHR26.01	BASENJICHRX.01X	83.87	460.2	KEEP	2	0	2	900.473	62	27609.3	0.44684	93.7094	0	0	FALSE	FALSE	-1	-1	0	0	0	0	1150	1150	BASPBJ0744_pilon len=1.246 Mb 92.17% 26(+) 25,047,414:26,670,618; 51.17% 26(-); 1.89% other; Diploidocus:PRIMARY|PRIMARY|PRIMARY|PRIMARY|PRIMARY|PRIMARY	GOOD|DIP|REPT|TOP|ALT|NONE	PURE|DIP|UNIQ|TOP|PRI|COMP	PURE|DIP|UNIQ|TOP|PRI|NONE|+TEL|+VEC	PRIMARY	PRIMARY	PRIMARY	keep	7
BASENJICHR26.03	19537	1	1.3111	99.9795	19533	2	6	0.4214	100	0	0	0	-	-	0	0	JUNK	0	0	1	66.9344	0	2473.04	0.4386	12.5929	0	0	FALSE	FALSE	-1	-1	0	0	0	0	0	0	BASPBJ0207_pilon len=19.54 kb 4.45% 26(+) 26,098,864:26,099,746;	LOWX|LOW|UNIQ|NON|PRI|NONE	-	-	LOWCOV	-	-	junk	1
BASENJICHR26.04	12793	32	28.2442	99.9687	12789	42	46	0.4452	4.784	26.5	68.72	0	BASENJICHR26.02	BASENJICHR26.01	95.4	1520.66	REPEAT	0	0	1	308.072	42	11084.1	0.45798	96.0993	0	0	FALSE	FALSE	-1	-1	0	0	0	0	0	0	BASPBJ0060_pilon len=12.79 kb 87.88% 26(+) 26,426,940:26,441,367; 10.58% 26(-); Diploidocus:PRIMARY|PRIMARY|PRIMARY|PRIMARY|PRIMARY|PRIMARY	GOOD|DIP|REPT|NON|PRI|NONE	GOOD|DIP|REPT|TOP|ALT|NONE	PURE|DIP|UNIQ|TOP|PRI|COMP	PRIMARY	PRIMARY	PRIMARY	keep	7
BASENJICHR26.05	12218	7	36.0186	100	12218	124	121	0.3927	54.93	26.03	0	19.04	BASENJICHR26.02	BASENJICHR26.01	96.18	393.74	REPEAT	0	0	2	1029.15	40	36386	0.44385	70.415	0	0	FALSE	FALSE	-1	-1	0	0	0	0	0	0	BASPBJ0429_pilon len=12.22 kb 63.57% 26(+) 26,332,245:26,340,765; 33.62% other;	GOOD|LOW|REPT|NON|ALT|NONE	GOOD|DIP|REPT|TOP|ALT|NONE	PURE|DIP|UNIQ|TOP|PRI|COMP	HPURGE	PRIMARY	PRIMARY	quarantine	1
BASENJICHR26.06	10556	16	25.3487	100	10556	14	63	0.4011	0.275	62.74	36.98	0	BASENJICHR26.02	BASENJICHR26.01	55.2	571.72	KEEP	0	0	2	1260.51	61	46992.8	0.41815	68.699	0	0	FALSE	FALSE	-1	-1	0	0	0	0	0	0	BASPBJ1369_pilon len=10.56 kb 47.66% 26(+) 25,730,882:26,228,321; 54.02% other; Diploidocus:PRIMARY|PRIMARY|PRIMARY|PRIMARY|PRIMARY|PRIMARY	GOOD|HAP|REPT|NON|ALT|NONE	GOOD|DIP|REPT|TOP|ALT|NONE	PURE|DIP|UNIQ|TOP|PRI|COMP	PRIMARY	PRIMARY	PRIMARY	keep	7
BASENJICHR26.07	9092	6	6.9931	100	9092	11	21	0.4185	61.51	38.5	0	0	BASENJICHR26.01	BASENJICHRX.01X	90.7	597.75	KEEP	0	0	3	1111.91	75	35328.4	0.42466	81.5906	0	0	FALSE	FALSE	-1	-1	0	0	0	0	0	0	RevComp BASPBJ1166_pilon len=9.092 kb 272.95% 26(-) 27,376,386:27,547,750; 5.43% other;	GOOD|LOW|REPT|NON|REP|NONE	PURE|DIP|UNIQ|TOP|PRI|COMP	PURE|DIP|UNIQ|TOP|PRI|NONE|+TEL|+VEC	HPURGE	PRIMARY	PRIMARY	quarantine	1
BASENJICHR26.08	5824	35	31.0019	99.2273	5779	28	26	0.4175	0.8243	21.98	77.2	0	BASENJICHRX.01X	BASENJICHR3.01	82.14	1805.03	KEEP	0	0	6	1097.1	255	52011.1	0.42308	88.1683	0	0	FALSE	FALSE	-1	-1	0	0	0	0	0	0	RevComp BASPBJ0247_pilon len=5.824 kb 83.57% 26(-) 26,397,699:26,402,819; Diploidocus:PRIMARY|PRIMARY|PRIMARY|PRIMARY|PRIMARY|PRIMARY	GOOD|DIP|REPT|NON|REP|NONE	PURE|DIP|UNIQ|TOP|PRI|NONE|+TEL|+VEC	PURE|DIP|UNIQ|SEC|PRI|COMP|+VEC	PRIMARY	PRIMARY	PRIMARY	keep	7
BASENJICHR26.09	5659	1	1.3861	94.363	5340	3	1	0.387	100	0	0	0	-	-	0	0	JUNK	0	0	2	443.033	33	13473.6	0.37621	62.5954	0	0	FALSE	FALSE	-1	-1	0	0	0	0	0	0	RevComp BASPBJ0919_pilon len=5.659 kb 84.61% 26(-) 16,912,918:16,917,742;	LOWX|LOW|UNIQ|NON|ALT|NONE	-	-	LOWCOV	-	-	junk	1
BASENJICHR27.01	46255058	35	36.5571	99.9768	46244345	101177	101065	0.396	0.04815	5.953	93.68	0.3189	-	-	0	0	KEEP	3	3	1	989.189	37	25933	0.40178	99.5665	0	0	FALSE	FALSE	-1	-1	0	137	4	2	0	0	BASPBJ0073_pilon len=46.26 Mb 99.18% 27(+) 177:45,876,710; 0.41% 27(-); 0.19% other; Diploidocus:PRIMARY|PRIMARY|PRIMARY|PRIMARY|PRIMARY|PRIMARY	PURE|DIP|UNIQ|TOP|PRI|COMP	-	-	PRIMARY	-	-	keep	7
BASENJICHR27.02	88838	17	19.2538	100	88838	126	113	0.4362	2.264	77.21	20.53	0	BASENJICHR27.01	BASENJICHRX.01X	98.04	565.45	REPEAT	0	0	2	1071.29	47	24525.3	0.43609	95.388	0	0	FALSE	FALSE	-1	-1	0	0	0	0	0	0	BASPBJ0179_pilon len=88.84 kb 75.76% 27(+) 25,666,440:26,174,300; 12.45% 27(-); 7.30% other; Diploidocus:PRIMARY|PRIMARY|PRIMARY|PRIMARY|PRIMARY|PRIMARY	GOOD|HAP|REPT|NON|ALT|NONE	PURE|DIP|UNIQ|TOP|PRI|COMP	PURE|DIP|UNIQ|TOP|PRI|NONE|+TEL|+VEC	PRIMARY	PRIMARY	PRIMARY	keep	7
BASENJICHR27.03	14217	18	17.9102	100	14217	26	21	0.3941	0.113	99.89	0	0	BASENJICHR27.01	BASENJICHRX.01X	51.75	198.47	KEEP	0	0	2	1445.64	61	52338.6	0.39481	94.4754	0	0	FALSE	FALSE	-1	-1	0	0	0	0	0	0	BASPBJ0206_pilon len=14.22 kb 110.04% 27(+) 6,334,986:6,363,875; 44.76% 27(-); 39.83% other;	PURE|HAP|HOMO|NON|ALT|NONE	PURE|DIP|UNIQ|TOP|PRI|COMP	PURE|DIP|UNIQ|TOP|PRI|NONE|+TEL|+VEC	HPURGE	PRIMARY	PRIMARY	quarantine	1
BASENJICHR28.01	41326428	34	34.6811	99.9999	41326395	84207	84567	0.4276	0.004	6.627	93.28	0.09	-	-	0	0	KEEP	1	2	1	845.303	37	22031.9	0.43635	99.6943	0	0	FALSE	FALSE	-1	-1	0	142	1	5	50	50	BASPBJ0629_pilon len=41.33 Mb 99.25% 28(+) 309:41,181,848; 0.21% 28(-); 0.20% other; Diploidocus:PRIMARY|PRIMARY|PRIMARY|PRIMARY|PRIMARY|PRIMARY	PURE|DIP|UNIQ|TOP|PRI|COMP	-	-	PRIMARY	-	-	keep	7
BASENJICHR28.02	8648	54	84.4012	99.9653	8645	209	124	0.3436	0.1277	0.02299	60.03	39.82	BASENJICHR28.01	BASENJICHR1.02	99.46	585.67	REPEAT	0	0	2	9.2852	93	3258.76	0.35141	78.6476	0	0	FALSE	FALSE	-1	-1	0	0	0	0	0	0	RevComp BASPBJ1011_pilon len=8.648 kb 59.82% 28(-) 28,478,765:28,483,943; 5.77% other; Diploidocus:PRIMARY|PRIMARY|PRIMARY|PRIMARY|PRIMARY|PRIMARY	GOOD|DIP|REPT|NON|ALT|NONE	PURE|DIP|UNIQ|TOP|PRI|COMP	WEAK|DIP|REPT|TOP|REP|NONE	PRIMARY	PRIMARY	PRIMARY	keep	7
BASENJICHR28.03	8461	13	12.4088	100	8461	19	15	0.4281	3.758	96.24	0	0	-	-	0	0	KEEP	0	0	1	361.288	18	10666.5	0.43624	98.85	0	0	FALSE	FALSE	-1	-1	0	0	0	0	0	0	RevComp BASPBJ1087_pilon len=8.461 kb 99.81% 28(-) 7,543,238:7,551,681;	PURE|HAP|UNIQ|NON|PRI|NONE	-	-	HPURGE	-	-	quarantine	1
BASENJICHR29.01	42015559	36	36.3226	100	42015549	90467	90641	0.38	2.38e-05	4.417	95.35	0.237	-	-	0	0	KEEP	3	5	1	863.002	37	21917.4	0.38247	99.6598	0	0	FALSE	FALSE	-1	-1	0	63	1	10	0	0	BASPBJ1113_pilon len=42.02 Mb 98.98% 29(+) 105:41,808,804; 0.04% 29(-); 0.38% other; Diploidocus:PRIMARY|PRIMARY|PRIMARY|PRIMARY|PRIMARY|PRIMARY	PURE|DIP|UNIQ|TOP|PRI|COMP	-	-	PRIMARY	-	-	keep	7
BASENJICHR3.01	92104998	35	35.1946	99.9994	92104489	189208	189386	0.3984	0.0285	5.325	94.58	0.065	-	-	0	0	KEEP	0	3	1	807.353	37	20297.5	0.40398	99.6005	323	0	FALSE	FALSE	-1	-1	0	134	4	3	50	50	BASPBJ0272_pilon len=92.1 Mb 98.14% 3(+) 227,982:91,888,863; 1.04% 3(-); 0.38% other; Diploidocus:PRIMARY|PRIMARY|PRIMARY|PRIMARY|PRIMARY|PRIMARY	PURE|DIP|UNIQ|SEC|PRI|COMP|+VEC	-	-	PRIMARY	-	-	keep	7
BASENJICHR3.02	13659	16	15.435	100	13659	17	17	0.3609	0.015	99.99	0	0	BASENJICHR3.01	-	98.48	98.52	HAPLOTIG	0	0	2	699.796	39	23044.6	0.34673	96.7799	0	0	FALSE	FALSE	-1	-1	0	0	0	0	0	0	BASPBJ0623_pilon len=13.66 kb 97.73% 3(+) 76,212,104:76,225,913;	PURE|HAP|HAPL|NON|ALT|NONE	PURE|DIP|UNIQ|TOP|PRI|COMP|+VEC	-	HPURGE	PRIMARY	-	quarantine	1
BASENJICHR3.03	11749	2	3.5703	98.5786	11582	7	3	0.3542	77.84	22.16	0	0	BASENJICHR3.01	BASENJICHR10.01	98.15	281.19	REPEAT	0	0	2	114.933	27	2861.95	0.34497	55.583	0	0	FALSE	FALSE	-1	-1	0	0	0	0	0	0	BASPBJ0182_pilon len=11.75 kb 52.94% 3(+) 31,454,723:31,465,452; 13.46% 3(-); 13.70% other;	LOWX|LOW|REPT|NON|ALT|NONE	PURE|DIP|UNIQ|TOP|PRI|COMP|+VEC	PURE|DIP|UNIQ|TOP|PRI|COMP|+VEC	LOWCOV	PRIMARY	PRIMARY	junk	1
BASENJICHR3.04	10135	20	14.1548	99.9605	10131	17	19	0.4015	32.65	64.97	2.378	0	BASENJICHR27.01	BASENJICHRX.01X	75.96	164.07	KEEP	0	0	1	856.827	17	28787.1	0.3998	76.6446	0	0	FALSE	FALSE	-1	-1	0	0	0	0	0	0	RevComp BASPBJ0089_pilon len=10.14 kb 11.86% 3(-) 42,776,763:42,777,965; 5.61% other;	GOOD|HAP|HOMO|NON|PRI|NONE	PURE|DIP|UNIQ|TOP|PRI|COMP	PURE|DIP|UNIQ|TOP|PRI|NONE|+TEL|+VEC	HPURGE	PRIMARY	PRIMARY	quarantine	1
BASENJICHR3.05	9333	26	57.3388	62.9165	5872	152	153	0.5003	37.12	10.24	20.39	32.25	BASENJICHR19.01	BASENJICHR31.01	88.91	425.09	KEEP	0	0	1	860.825	0	19636.3	0.47691	33.6628	0	0	FALSE	FALSE	-1	-1	0	0	0	0	0	0	RevComp BASPBJ1261_pilon len=9.333 kb 25.30% 3(-) 98,408:100,809; Diploidocus:PRIMARY|KEEP|KEEP|PRIMARY|KEEP|KEEP	WEAK|LOW|REPT|NON|PRI|NONE	PURE|DIP|UNIQ|TOP|PRI|COMP	PURE|DIP|UNIQ|TOP|PRI|COMP	PRIMARY	PRIMARY	PRIMARY	keep	7
BASENJICHR3.06	1424	23	21.1004	100	1424	19	14	0.3735	0.14	99.86	0	0	BASENJICHR18.01	BASENJICHR34.01	85.74	259.97	KEEP	0	0	10	711.984	3792	32344.9	0.375	94.063	0	0	FALSE	FALSE	-1	-1	0	0	0	0	0	0	BASPBJ0636_pilon len=1.424 kb 88.27% 3(+) 180,810:182,062; 187.64% other; Diploidocus:PRIMARY	PURE|HAP|REPT|NON|REP|NONE	PURE|DIP|UNIQ|TOP|PRI|COMP|+VEC	PURE|DIP|UNIQ|SEC|PRI|COMP	HPURGE	PRIMARY	PRIMARY	quarantine	2
BASENJICHR3.07	1406	70	67.9943	99.9289	1405	40	56	0.3966	0.1421	0	38.98	60.88	BASENJICHR20.01	BASENJICHR19.01	93.81	202.77	KEEP	0	0	7	1745.05	1707	62109.4	0.40967	98.1884	0	0	FALSE	FALSE	-1	-1	0	0	0	0	0	0	RevComp BASPBJ1279_pilon len=1.406 kb 99.86% 3(-) 186,853:188,262; 198.93% other; Diploidocus:PRIMARY|PRIMARY|PRIMARY|PRIMARY|PRIMARY|PRIMARY	GOOD|EXS|HOMO|NON|REP|NONE	PURE|DIP|UNIQ|TOP|PRI|COMP|+VEC	PURE|DIP|UNIQ|TOP|PRI|COMP	PRIMARY	PRIMARY	PRIMARY	keep	7
BASENJICHR3.08	934	27	24.7034	100	934	22	16	0.3652	3.64	35.33	61.03	0	BASENJICHR20.01	BASENJICHR19.01	94.86	967.45	KEEP	0	0	2	6.84581	2603	7536.89	0.36938	93.1718	0	0	FALSE	FALSE	-1	-1	0	0	0	0	0	0	BASPBJ1212_pilon len=934 bp 48.29% 3(+) 214,524:214,975; Diploidocus:PRIMARY|PRIMARY|PRIMARY|PRIMARY|PRIMARY|PRIMARY	GOOD|DIP|REPT|NON|ALT|NONE	PURE|DIP|UNIQ|TOP|PRI|COMP|+VEC	PURE|DIP|UNIQ|TOP|PRI|COMP	PRIMARY	PRIMARY	PRIMARY	keep	7
BASENJICHR31.01	39358666	36	36.5254	100	39358666	85345	85152	0.3907	0.005	5.369	94.5	0.132	-	-	0	0	KEEP	1	3	1	842.26	37	20991.1	0.39556	99.6106	0	0	FALSE	FALSE	-1	-1	0	42	0	2	0	0	BASPBJ0385_pilon len=39.36 Mb 100.39% 31(+) 38,659:39,893,870; 0.59% 31(-); 0.27% other; Diploidocus:PRIMARY|PRIMARY|PRIMARY|PRIMARY|PRIMARY|PRIMARY	PURE|DIP|UNIQ|TOP|PRI|COMP	-	-	PRIMARY	-	-	keep	7
BASENJICHR31.02	10764	0	0.4181	39.6228	4265	5	1	0.4598	100	0	0	0	-	-	0	0	JUNK	0	0	1	448.08	0	14793.3	0.43664	34.485	0	0	FALSE	FALSE	-1	-1	0	0	0	0	0	0	RevComp BASPBJ0433_pilon len=10.76 kb 23.58% 31(-) 31,335,228:31,337,788;	LOWX|LOW|UNIQ|NON|PRI|NONE	-	-	LOWCOV	-	-	junk	1
BASENJICHR31.03	7694	20	19.6246	100	7694	15	24	0.5095	0.767	84.81	14.43	0	BASENJISCAFF0644	BASENJISCAFF0554	97.48	877.45	REPEAT	0	0	1701	2220.36	192904	234826	0.50754	99.3219	0	0	FALSE	FALSE	-1	-1	0	0	0	0	0	0	BASPBJ1275_pilon len=7.694 kb 10.38% 31(+) 36,924,854:36,925,652; 2.92% other;	PURE|HAP|REPT|NON|REP|NONE	PURE|DIP|UNIQ|TOP|PRI|NONE	PURE|DIP|UNIQ|SEC|REP|NONE	HPURGE	PRIMARY	PRIMARY	quarantine	1
BASENJICHR31.04	4783	8	8.4508	100	4783	7	8	0.3689	21.31	78.69	0	0	BASENJICHR1.01	-	7.05	7.05	KEEP	0	0	1	215.268	22	7189.68	0.364	96.5735	0	0	FALSE	FALSE	-1	-1	0	0	0	0	0	0	BASPBJ0124_pilon len=4.783 kb 100.00% 31(+) 14,522,366:14,527,158;	GOOD|HAP|PART|NON|PRI|NONE	PURE|DIP|UNIQ|TOP|PRI|COMP|+VEC	-	HPURGE	PRIMARY	-	quarantine	1
BASENJICHR32.01	38763827	36	36.4437	100	38763827	83396	82686	0.3683	0	3.616	96.22	0.166	-	-	0	0	KEEP	0	0	1	939.272	37	24571.5	0.36953	99.7249	0	0	FALSE	FALSE	-1	-1	0	51	1	5	25	25	RevComp BASPBJ0177_pilon len=38.76 Mb 99.54% 32(-) 27,966:38,794,906; 0.03% 32(+); 0.34% other; Diploidocus:PRIMARY|PRIMARY|PRIMARY|PRIMARY|PRIMARY|PRIMARY	PURE|DIP|UNIQ|NON|PRI|COMP	-	-	PRIMARY	-	-	keep	7
BASENJICHR32.02	10151	17	17.134	100	10151	18	19	0.3722	0.01	99.99	0	0	BASENJICHRX.01X	BASENJICHR12.01	39.66	231.73	KEEP	0	0	1	197.436	21	8238.18	0.36972	98.0444	0	0	FALSE	FALSE	-1	-1	0	0	0	0	0	0	RevComp BASPBJ1165_pilon len=10.15 kb 107.64% 32(-) 2,321,569:2,381,612; 19.17% other;	PURE|HAP|PART|NON|PRI|NONE	PURE|DIP|UNIQ|TOP|PRI|NONE|+TEL|+VEC	PURE|DIP|UNIQ|TOP|PRI|COMP|+VEC	HPURGE	PRIMARY	PRIMARY	quarantine	1
BASENJICHR32.03	7633	11	12.3723	100	7633	14	20	0.3473	11.35	88.66	0	0	BASENJICHR32.01	BASENJICHR8.01	96.54	190.92	HAPLOTIG	0	0	1	33.2822	45	1060.92	0.35006	83.7781	0	0	FALSE	FALSE	-1	-1	0	0	0	0	0	0	RevComp BASPBJ1027_pilon len=7.633 kb 85.64% 32(-) 38,688,977:38,695,760; 50.20% other;	PURE|HAP|HOMO|NON|PRI|NONE	PURE|DIP|UNIQ|TOP|PRI|COMP	PURE|DIP|UNIQ|TOP|PRI|COMP|+VEC	HPURGE	PRIMARY	PRIMARY	quarantine	1
BASENJICHR32.04	4572	9	13.2863	100	4572	26	21	0.363	2.822	85.81	11.37	0	BASENJICHR32.01	BASENJICHR9.01	87.29	87.29	KEEP	0	0	2	488.061	33	13918.7	0.34624	69.4237	0	0	FALSE	FALSE	-1	-1	0	0	0	0	0	0	BASPBJ0033_pilon len=4.572 kb 80.07% 32(+) 4,846,163:4,849,893;	PURE|HAP|HOMO|NON|ALT|NONE	PURE|DIP|UNIQ|TOP|PRI|COMP	PURE|DIP|UNIQ|TOP|PRI|COMP	HPURGE	PRIMARY	PRIMARY	quarantine	1
BASENJICHR33.01	31479946	36	38.9925	99.9999	31479919	72991	73011	0.3938	0.02301	4.213	95.68	0.085	-	-	0	0	KEEP	0	0	1	873.904	37	22361.9	0.39253	99.429	53	0	FALSE	FALSE	-1	-1	0	87	2	10	25	25	RevComp BASPBJ0690_pilon len=31.48 Mb 98.67% 33(-) 113,140:31,376,865; 0.16% 33(+); 0.13% other; Diploidocus:PRIMARY|PRIMARY|PRIMARY|PRIMARY|PRIMARY|PRIMARY	PURE|DIP|UNIQ|NON|PRI|COMP|+VEC	-	-	PRIMARY	-	-	keep	7
BASENJICHR33.02	12011	23	22.2879	100	12011	18	34	0.4952	0	97.14	2.864	0	BASENJISCAFF0461	BASENJICHR24.02	55.13	256.36	KEEP	0	0	1424	1599.46	65978	168535	0.49929	99.1489	0	0	FALSE	FALSE	-1	-1	0	0	0	0	0	0	BASPBJ0194_pilon len=12.01 kb 26.99% 33(+) 25,009,258:25,012,493; 34.50% other;	PURE|HAP|REPT|NON|REP|NONE	GOOD|DIP|REPT|TOP|REP|NONE	GOOD|DIP|REPT|TOP|REP|NONE	HPURGE	PRIMARY	PRIMARY	quarantine	1
BASENJICHR33.03	7007	14	13.8697	100	7007	18	11	0.3883	0	100	0	0	-	-	0	0	KEEP	0	0	1	808.009	19	23447.5	0.38676	97.4646	0	0	FALSE	FALSE	-1	-1	0	0	0	0	0	0	RevComp BASPBJ0845_pilon len=7.007 kb 98.50% 33(-) 20,231,249:20,238,133;	PURE|HAP|UNIQ|NON|PRI|NONE	-	-	HPURGE	-	-	quarantine	1
BASENJICHR34.01	42143037	35	36.6678	99.9999	42142986	92162	92439	0.3999	0.005062	5.456	94.47	0.072	-	-	0	0	KEEP	0	1	1	782.265	37	19651.2	0.40422	99.6578	0	0	FALSE	FALSE	-1	-1	0	70	1	6	25	25	BASPBJ0043_pilon len=42.14 Mb 99.04% 34(+) 75,231:42,124,431; 0.31% 34(-); 0.60% other; Diploidocus:PRIMARY|PRIMARY|PRIMARY|PRIMARY|PRIMARY|PRIMARY	PURE|DIP|UNIQ|SEC|PRI|COMP	-	-	PRIMARY	-	-	keep	7
BASENJICHR34.02	4448	1110	986.36	100	4448	892	844	0.4207	0.292	0.045	0.54	99.12	-	-	0	0	JUNK	0	0	3	1600.27	2420	17986.3	0.46043	89.8688	0	0	FALSE	FALSE	-1	-1	0	0	0	0	0	0	RevComp BASPBJ1136_pilon len=4.448 kb 55.13% 34(-) 13,172:15,543; 42.36% other; Diploidocus:COLLAPSED|COLLAPSED|COLLAPSED|COLLAPSED|COLLAPSED|COLLAPSED	PURE|EXS|UNIQ|NON|REP|NONE	-	-	COLLAPSED	-	-	repeat	7
BASENJICHR34.03	4105	65	67.734	99.9513	4103	38	52	0.5435	0.2436	0	55.1	44.65	BASENJICHR1.02	BASENJICHR19.01	99.24	1491.16	REPEAT	0	0	1	26.3584	0	4607.67	0.54957	39.2743	0	0	FALSE	FALSE	-1	-1	0	0	0	0	0	0	RevComp BASPBJ0973_pilon len=4.105 kb 17.42% 34(-) 8,626:9,338; Diploidocus:PRIMARY|PRIMARY|PRIMARY|PRIMARY|PRIMARY|PRIMARY	GOOD|DIP|REPT|NON|PRI|NONE	WEAK|DIP|REPT|TOP|REP|NONE	PURE|DIP|UNIQ|TOP|PRI|COMP	PRIMARY	PRIMARY	PRIMARY	keep	7
BASENJICHR35.01	26557760	35	35.5924	100	26557749	55598	55208	0.4091	4.142e-05	5.55	94.4	0.048	-	-	0	0	KEEP	0	0	1	797.556	37	19739.3	0.41456	99.5331	130	0	FALSE	FALSE	-1	-1	0	49	2	1	0	0	BASPBJ0254_pilon len=26.56 Mb 99.25% 35(+) 47,805:26,524,999; 0.26% 35(-); 0.66% other; Diploidocus:PRIMARY|PRIMARY|PRIMARY|PRIMARY|PRIMARY|PRIMARY	PURE|DIP|UNIQ|NON|PRI|COMP|+VEC	-	-	PRIMARY	-	-	keep	7
BASENJICHR35.02	868575	112	333.074	99.7979	866820	19718	19852	0.4585	0.828	4.059	32.69	62.43	BASENJICHR1.02	BASENJICHR38.01	86.68	2314.09	KEEP	93	19	15	780.184	2938	48681.8	0.47351	86.8546	0	0	FALSE	FALSE	-1	-1	0	0	0	0	829	829	RevComp BASPBJ0223_pilon len=868.6 kb 0.63% 35(-) 103:5,787; 0.33% other; Diploidocus:PRIMARY|PRIMARY|PRIMARY|PRIMARY|PRIMARY|PRIMARY	GOOD|EXS|REPT|TOP|REP|NONE	WEAK|DIP|REPT|TOP|REP|NONE	PURE|DIP|UNIQ|SEC|PRI|COMP	PRIMARY	PRIMARY	PRIMARY	keep	7
BASENJICHR35.03	7981	88	145.685	100	7981	262	228	0.5418	0.163	0.013	41.2	58.63	BASENJICHR19.01	BASENJICHR8.01	73.42	489.95	KEEP	0	0	1	746.078	346	25279	0.51184	69.1138	0	0	FALSE	FALSE	-1	-1	0	0	0	0	0	0	RevComp BASPBJ0340_pilon len=7.981 kb 12.29% 35(-) 5,997:6,969; Diploidocus:PRIMARY|PRIMARY|PRIMARY|PRIMARY|PRIMARY|PRIMARY	GOOD|EXS|REPT|NON|PRI|NONE	PURE|DIP|UNIQ|TOP|PRI|COMP	PURE|DIP|UNIQ|TOP|PRI|COMP|+VEC	PRIMARY	PRIMARY	PRIMARY	keep	7
BASENJICHR36.01	31053474	35	37.4312	99.9919	31050965	68536	68409	0.3791	0.01608	4.863	94.83	0.289	-	-	0	0	KEEP	0	1	1	816.219	37	20971	0.38681	99.4934	1569	0.01	FALSE	FALSE	-1	-1	0	59	1	4	0	0	RevComp BASPBJ1386_pilon len=31.05 Mb 98.66% 36(-) 101:30,810,464; 0.02% 36(+); 0.08% other; Diploidocus:PRIMARY|PRIMARY|PRIMARY|PRIMARY|PRIMARY|PRIMARY	PURE|DIP|UNIQ|SEC|PRI|COMP|+VEC	-	-	PRIMARY	-	-	keep	7
BASENJICHR36.02	1230	59	57.7382	100	1230	92	2	0.3843	0	1.545	64.06	34.39	BASENJISCAFF0280	BASENJICHR27.01	100	199.19	HAPLOTIG	0	0	4014	3652.93	155027	144526	0.39024	94.0199	0	0	FALSE	FALSE	-1	-1	0	0	0	0	0	0	RevComp BASPBJ0265_pilon len=1.23 kb 47.89% 36(-) 16,962,570:16,963,163; Diploidocus:PRIMARY|PRIMARY|PRIMARY|PRIMARY|PRIMARY|PRIMARY	GOOD|DIP|HOMO|NON|REP|NONE	WEAK|EXS|HOMO|TOP|REP|NONE	PURE|DIP|UNIQ|TOP|PRI|COMP	PRIMARY	PRIMARY	PRIMARY	keep	7
BASENJICHR37.01	30789429	35	35.2775	99.9976	30788703	63488	63075	0.3967	0.02336	5.711	94.26	0.006	-	-	0	0	KEEP	0	0	1	796.012	37	19945.8	0.40249	99.4684	0	0	FALSE	FALSE	-1	-1	0	83	5	3	0	0	RevComp BASPBJ0044_pilon len=30.79 Mb 99.29% 37(-) 130,551:30,902,985; 0.05% 37(+); 0.17% other; Diploidocus:PRIMARY|PRIMARY|PRIMARY|PRIMARY|PRIMARY|PRIMARY	PURE|DIP|UNIQ|NON|PRI|COMP	-	-	PRIMARY	-	-	keep	7
BASENJICHR37.02	29077	51	553.112	100	29077	1229	1200	0.3246	1.493	1.352	65.32	31.83	BASENJICHR1.02	BASENJICHR35.02	99.98	5683.01	REPEAT	0	0	3	1056.06	173	39016	0.31379	86.9196	0	0	FALSE	FALSE	-1	-1	0	0	0	0	0	0	BASPBJ0726_pilon len=29.08 kb 7.73% 37(+) 672:2,568; Diploidocus:PRIMARY|PRIMARY|PRIMARY|PRIMARY|PRIMARY|PRIMARY	GOOD|DIP|REPT|NON|REP|NONE	WEAK|DIP|REPT|TOP|REP|NONE	GOOD|EXS|REPT|TOP|REP|NONE	PRIMARY	PRIMARY	PRIMARY	keep	7
BASENJICHR37.03	5442	28	28.9958	99.9449	5439	19	29	0.4757	0.4959	12.37	87.14	0	-	-	0	0	KEEP	0	0	1	130.417	35	4255.02	0.48126	73.4121	0	0	FALSE	FALSE	-1	-1	0	0	0	0	0	0	RevComp BASPBJ0494_pilon len=5.442 kb 71.54% 37(-) 121,894:126,684; Diploidocus:PRIMARY|PRIMARY|PRIMARY|PRIMARY|PRIMARY|PRIMARY	PURE|DIP|UNIQ|NON|PRI|NONE	-	-	PRIMARY	-	-	keep	7
BASENJICHR37.04	4240	18	95.1736	99.9764	4239	218	223	0.3943	0.3065	49.88	0.09398	49.72	BASENJICHR11.01	BASENJICHR19.01	43	261.34	KEEP	0	0	1	87.5092	20	6605.39	0.40472	52.1832	0	0	FALSE	FALSE	-1	-1	0	0	0	0	0	0	RevComp BASPBJ0169_pilon len=4.24 kb 31.11% 37(-) 100,314:101,612; Diploidocus:KEEP|KEEP|KEEP|KEEP|KEEP|KEEP	WEAK|HAP|PART|NON|PRI|NONE	PURE|DIP|UNIQ|TOP|PRI|COMP	PURE|DIP|UNIQ|TOP|PRI|COMP	KEEP	PRIMARY	PRIMARY	keep	7
BASENJICHR37.05	2793	9	42.5209	98.9259	2763	102	89	0.3537	41.17	15.4	18.04	25.39	BASENJICHR1.02	BASENJICHR27.01	40.82	259.86	KEEP	0	0	1	2894.17	0	91452.7	0.32116	36.0318	0	0	FALSE	FALSE	-1	-1	0	0	0	0	0	0	RevComp BASPBJ1292_pilon len=2.793 kb 16.76% 37(-) 1,856:2,323; 11.53% other; Diploidocus:KEEP|KEEP|PRIMARY|KEEP|KEEP|KEEP	WEAK|LOW|PART|NON|PRI|NONE	WEAK|DIP|REPT|TOP|REP|NONE	PURE|DIP|UNIQ|TOP|PRI|COMP	KEEP	PRIMARY	PRIMARY	keep	7
BASENJICHR37.06	2027	88	88.406	100	2027	68	78	0.3761	0	0	24.96	75.04	BASENJICHR11.01	BASENJICHR34.01	100	847.06	REPEAT	0	0	4	21.5327	3791	8452.56	0.3705	100	0	0	FALSE	FALSE	-1	-1	0	0	0	0	0	0	RevComp BASPBJ0715_pilon len=2.027 kb 78.34% 37(-) 17,035:18,610; 25.85% other; Diploidocus:PRIMARY|PRIMARY|PRIMARY|PRIMARY|PRIMARY|PRIMARY	GOOD|EXS|REPT|NON|REP|NONE	PURE|DIP|UNIQ|TOP|PRI|COMP	PURE|DIP|UNIQ|SEC|PRI|COMP	PRIMARY	PRIMARY	PRIMARY	keep	7
BASENJICHR37.07	1847	127	117.71	99.9459	1846	81	86	0.3851	0.05414	0	10.12	89.82	-	-	0	0	JUNK	0	0	74	2183.57	9479	86920.1	0.39307	100	0	0	FALSE	FALSE	-1	-1	0	0	0	0	0	0	BASPBJ0614_pilon len=1.847 kb 162.10% 37(+) 11,232:96,688; 46.13% other; Diploidocus:COLLAPSED|COLLAPSED|COLLAPSED|COLLAPSED|COLLAPSED|COLLAPSED	PURE|EXS|UNIQ|NON|REP|NONE	-	-	COLLAPSED	-	-	repeat	7
BASENJICHR37.08	850	8	11.0776	100	850	5	19	0.3891	43.41	56.59	0	0	BASENJICHR24.01	BASENJICHR11.01	92.47	477.53	KEEP	0	0	1	77.0425	474	4657.22	0.37647	79.3689	0	0	FALSE	FALSE	-1	-1	0	0	0	0	0	0	RevComp BASPBJ0664_pilon len=850 bp 44.71% 37(-) 117,213:117,590;	GOOD|HAP|REPT|NON|PRI|NONE	PURE|DIP|UNIQ|TOP|PRI|COMP|+VEC	PURE|DIP|UNIQ|TOP|PRI|COMP	HPURGE	PRIMARY	PRIMARY	quarantine	1
BASENJICHR38.01	24377179	35	35.2798	99.9659	24368855	49855	50347	0.4026	0.04514	6.032	93.9	0.02099	-	-	0	0	KEEP	0	5	1	848.971	37	21162.4	0.41006	99.3825	0	0	FALSE	FALSE	-1	-1	0	61	0	3	0	0	RevComp BASPBJ0988_pilon len=24.38 Mb 98.29% 38(-) 139:23,909,471; 0.10% 38(+); 0.16% other; Diploidocus:PRIMARY|PRIMARY|PRIMARY|PRIMARY|PRIMARY|PRIMARY	PURE|DIP|UNIQ|SEC|PRI|COMP	-	-	PRIMARY	-	-	keep	7
BASENJICHR38.02	14091	1	1.0597	99.9503	14084	1	4	0.7106	100	0	0	0	-	-	0	0	JUNK	0	0	1	3.19616	0	49.1138	0.73174	18.5425	0	0	FALSE	FALSE	-1	-1	0	0	0	0	0	0	BASPBJ1065_pilon len=14.09 kb 6.71% 38(+) 21,089,383:21,090,344; 6.04% 38(-);	LOWX|LOW|UNIQ|NON|PRI|NONE	-	-	LOWCOV	-	-	junk	1
BASENJICHR38.03	3794	4	4.2153	100	3794	6	4	0.4056	87.06	12.94	0	0	-	-	0	0	JUNK	0	0	1	275.546	0	8190.6	0.35846	43.9225	0	0	FALSE	FALSE	-1	-1	0	0	0	0	0	0	BASPBJ0472_pilon len=3.794 kb 42.12% 38(+) 9,594,550:9,596,207;	PURE|LOW|UNIQ|NON|PRI|NONE	-	-	HPURGE	-	-	quarantine	1
BASENJICHR4.01	88677978	35	35.6395	99.9979	88676127	184229	185025	0.4	0.01003	4.949	94.96	0.086	-	-	0	0	KEEP	0	4	1	821.207	37	20780.9	0.40411	99.6336	344	0	FALSE	FALSE	-1	-1	0	190	5	5	50	50	BASPBJ0579_pilon len=88.68 Mb 99.24% 4(+) 101:88,276,593; 0.13% 4(-); 0.16% other; Diploidocus:PRIMARY|PRIMARY|PRIMARY|PRIMARY|PRIMARY|PRIMARY	PURE|DIP|UNIQ|SEC|PRI|COMP|+VEC	-	-	PRIMARY	-	-	keep	7
BASENJICHR4.02	14823	16	15.8979	100	14823	25	22	0.4087	0	100	0	0	BASENJICHR5.01	BASENJICHR37.01	2.42	7.28	KEEP	0	0	1	393.37	19	11412.8	0.41705	100	0	0	FALSE	FALSE	-1	-1	0	0	0	0	0	0	BASPBJ0681_pilon len=14.82 kb 100.00% 4(+) 10,104,137:10,118,959;	PURE|HAP|PART|NON|PRI|NONE	PURE|DIP|UNIQ|TOP|PRI|COMP|+VEC	PURE|DIP|UNIQ|SEC|PRI|COMP	HPURGE	PRIMARY	PRIMARY	quarantine	1
BASENJICHR4.03	9852	41	38.6984	99.9695	9849	47	56	0.3232	0.3044	10.66	89.04	0	-	-	0	0	KEEP	0	0	3	639.411	131	22866.9	0.30593	94.6469	0	0	FALSE	FALSE	-1	-1	0	0	0	0	0	0	RevComp BASPBJ0047_pilon len=9.852 kb 5.33% 4(-) 30,994,829:30,995,353; 7.02% other; Diploidocus:PRIMARY|PRIMARY|PRIMARY|PRIMARY|PRIMARY|PRIMARY	PURE|DIP|UNIQ|NON|REP|NONE	-	-	PRIMARY	-	-	keep	7
BASENJICHR4.04	3815	17	16.6301	100	3815	13	10	0.3459	0.026	99.97	0	0	BASENJICHR4.01	BASENJISCAFF0596	66.92	133.84	KEEP	1	0	2	1722.97	45	66567.2	0.34784	97.7567	0	0	FALSE	FALSE	-1	-1	0	0	0	0	0	0	RevComp BASPBJ0994_pilon len=3.815 kb 66.92% 4(-) 66,281,729:66,284,277;	PURE|HAP|HOMO|TOP|ALT|NONE	PURE|DIP|UNIQ|TOP|PRI|COMP|+VEC	LOWX|LOW|HOMO|SEC|PRI|NONE	HPURGE	PRIMARY	LOWCOV	quarantine	1
BASENJICHR4.05	2369	1	1.2566	82.6931	1959	1	1	0.2896	100	0	0	0	-	-	0	0	JUNK	0	0	2	11.408	33	295.974	0.3149	89.7994	0	0	FALSE	FALSE	-1	-1	0	0	0	0	0	0	BASPBJ0172_pilon len=2.369 kb 90.12% 4(+) 17,988,905:17,991,042;	LOWX|LOW|UNIQ|NON|ALT|NONE	-	-	LOWCOV	-	-	junk	1
BASENJICHR5.01	88931137	34	34.609	100	88931136	179540	180570	0.4337	0.013	7.262	92.62	0.102	-	-	0	0	KEEP	0	2	1	799.829	37	20468.9	0.44286	99.5353	473	0	FALSE	FALSE	-1	-1	0	325	7	6	75	75	BASPBJ1379_pilon len=88.93 Mb 99.11% 5(+) 101:88,915,250; 0.14% 5(-); 0.10% other; Diploidocus:PRIMARY|PRIMARY|PRIMARY|PRIMARY|PRIMARY|PRIMARY	PURE|DIP|UNIQ|SEC|PRI|COMP|+VEC	-	-	PRIMARY	-	-	keep	7
BASENJICHR5.02	60815	5	6.8447	100	60815	38	30	0.2939	63.26	36.74	0	0	BASENJICHR5.01	BASENJICHR8.01	99.9	6496.19	REPEAT	0	0	1	191.506	0	6013.69	0.29706	48.3081	0	0	FALSE	FALSE	-1	-1	0	0	0	0	0	0	RevComp BASPBJ0630_pilon len=60.82 kb 16.25% 5(-) 30,021,228:30,053,105;	GOOD|LOW|REPT|NON|PRI|NONE	PURE|DIP|UNIQ|TOP|PRI|COMP|+VEC	PURE|DIP|UNIQ|TOP|PRI|COMP|+VEC	HPURGE	PRIMARY	PRIMARY	quarantine	1
BASENJICHR5.03	11830	120	119.775	100	11830	128	107	0.4753	0	0	3.948	96.05	-	-	0	0	JUNK	0	0	2	193.052	201	8167.31	0.50431	90.8675	0	0	FALSE	FALSE	-1	-1	0	0	0	0	0	0	BASPBJ0065_pilon len=11.83 kb 19.54% 5(+) 78,148,487:78,150,803; Diploidocus:COLLAPSED|COLLAPSED|COLLAPSED|COLLAPSED|COLLAPSED|COLLAPSED	PURE|EXS|UNIQ|NON|ALT|NONE	-	-	COLLAPSED	-	-	repeat	7
BASENJICHR5.04	6856	22	17.6155	99.9708	6854	16	18	0.3415	23.38	76.62	0	0	BASENJICHR5.01	-	26.85	26.85	KEEP	0	0	1	641.36	17	23760.4	0.34743	83.7482	0	0	FALSE	FALSE	-1	-1	0	0	0	0	0	0	RevComp BASPBJ1016_pilon len=6.856 kb 64.92% 5(-) 27,721,283:27,725,735;	GOOD|HAP|PART|NON|PRI|NONE	PURE|DIP|UNIQ|TOP|PRI|COMP|+VEC	-	HPURGE	PRIMARY	-	quarantine	1
BASENJICHR6.01	77624785	35	34.8211	99.9972	77622624	156827	156662	0.4187	0.04014	6.666	93.15	0.144	-	-	0	0	KEEP	2	0	1	879.481	37	22660.5	0.42705	99.6458	55	0	FALSE	FALSE	-1	-1	0	260	9	6	500	500	BASPBJ0258_pilon len=77.62 Mb 99.06% 6(+) 269,882:77,573,801; 0.24% 6(-); 0.26% other; Diploidocus:PRIMARY|PRIMARY|PRIMARY|PRIMARY|PRIMARY|PRIMARY	PURE|DIP|UNIQ|TOP|PRI|COMP|+VEC	-	-	PRIMARY	-	-	keep	7
BASENJICHR6.02	7891	17	16.6488	100	7891	14	15	0.3891	0.203	99.8	0	0	BASENJICHRX.01X	BASENJICHR6.01	38.63	186.02	KEEP	0	0	1	1868.8	22	52994.5	0.39235	96.3891	0	0	FALSE	FALSE	-1	-1	0	0	0	0	0	0	RevComp BASPBJ0274_pilon len=7.891 kb 99.81% 6(-) 16,728,177:16,736,061; 104.70% other;	PURE|HAP|PART|NON|PRI|NONE	PURE|DIP|UNIQ|TOP|PRI|NONE|+TEL|+VEC	PURE|DIP|UNIQ|TOP|PRI|COMP|+VEC	HPURGE	PRIMARY	PRIMARY	quarantine	1
BASENJICHR6.03	6463	41	57.4798	99.9226	6458	108	98	0.4186	0.573	0.03098	62.65	36.75	BASENJICHR6.01	BASENJICHR20.01	88.23	185.21	KEEP	0	0	2	2014.16	96	41057	0.41095	88.7059	0	0	FALSE	FALSE	-1	-1	0	0	0	0	0	0	RevComp BASPBJ0277_pilon len=6.463 kb 62.57% 6(-) 288,063:354,923; 7.92% 6(+); 29.88% other; Diploidocus:PRIMARY|PRIMARY|PRIMARY|PRIMARY|PRIMARY|PRIMARY	GOOD|DIP|HOMO|NON|ALT|NONE	PURE|DIP|UNIQ|TOP|PRI|COMP|+VEC	PURE|DIP|UNIQ|TOP|PRI|COMP|+VEC	PRIMARY	PRIMARY	PRIMARY	keep	7
BASENJICHR6.04	4818	11	10.884	99.8962	4813	17	7	0.3527	35.93	64.07	0	0	BASENJICHR10.02	BASENJICHR6.01	100	199.29	HAPLOTIG	0	0	3	3.83994	148	185.149	0.34226	98.0175	0	0	FALSE	FALSE	-1	-1	0	0	0	0	0	0	BASPBJ0394_pilon len=4.818 kb 99.36% 6(+) 40,482,330:40,487,105; 177.29% other;	GOOD|HAP|HOMO|NON|REP|NONE	GOOD|EXS|REPT|TOP|ALT|NONE	PURE|DIP|UNIQ|TOP|PRI|COMP|+VEC	HPURGE	PRIMARY	PRIMARY	quarantine	1
BASENJICHR6.05	3510	171	157.841	100	3510	114	118	0.492	0	0	0.199	99.8	-	-	0	0	JUNK	0	0	49	853.925	11911	161971	0.50256	99.3972	0	0	FALSE	FALSE	-1	-1	0	0	0	0	0	0	RevComp BASPBJ0613_pilon len=3.51 kb 97.38% 6(-) 8,768:11,757; Diploidocus:COLLAPSED|COLLAPSED|COLLAPSED|COLLAPSED|COLLAPSED|COLLAPSED	PURE|EXS|UNIQ|NON|REP|NONE	-	-	COLLAPSED	-	-	repeat	7
BASENJICHR6.06	774	12	12.8682	100	774	11	11	0.5484	6.848	93.15	0	0	BASENJICHR19.01	BASENJICHR21.01	98.06	652.2	REPEAT	0	0	2	3.19385	1478	2322.41	0.58527	85.2941	0	0	FALSE	FALSE	-1	-1	0	0	0	0	0	0	RevComp BASPBJ0298_pilon len=774 bp 76.87% 6(-) 46,165:46,759; 71.71% other;	PURE|HAP|REPT|NON|ALT|NONE	PURE|DIP|UNIQ|TOP|PRI|COMP	PURE|DIP|UNIQ|SEC|PRI|COMP|+VEC	HPURGE	PRIMARY	PRIMARY	quarantine	1
BASENJICHR7.01	80730119	35	35.1385	99.9977	80728273	165816	166353	0.4038	0.01422	5.375	94.55	0.059	-	-	0	0	KEEP	2	0	1	844.426	37	21707.3	0.40977	99.6667	0	0	FALSE	FALSE	-1	-1	0	214	5	11	50	50	RevComp BASPBJ0176_pilon len=80.73 Mb 99.36% 7(-) 101:80,898,131; 0.39% 7(+); 0.13% other; Diploidocus:PRIMARY|PRIMARY|PRIMARY|PRIMARY|PRIMARY|PRIMARY	PURE|DIP|UNIQ|TOP|PRI|COMP	-	-	PRIMARY	-	-	keep	7
BASENJICHR7.02	39906	28	29.01	100	39906	75	60	0.4441	0.413	44.68	54.91	0	BASENJICHR7.01	-	63.14	63.95	KEEP	0	0	2	764.263	54	16971.1	0.46023	99.4032	0	0	FALSE	FALSE	-1	-1	0	0	0	0	0	0	RevComp BASPBJ1382_pilon len=39.91 kb 99.09% 7(-) 27,155,626:27,195,499; 76.82% 7(+); Diploidocus:PRIMARY|PRIMARY|PRIMARY|PRIMARY|PRIMARY|PRIMARY	GOOD|DIP|HAPL|NON|ALT|NONE	PURE|DIP|UNIQ|TOP|PRI|COMP	-	PRIMARY	PRIMARY	-	keep	7
BASENJICHR7.03	20259	14	11.2061	100	20259	21	12	0.4218	32.05	67.96	0	0	BASENJICHR7.01	-	20.55	20.55	KEEP	0	1	2	841.334	38	25427.9	0.44138	79.998	0	0	FALSE	FALSE	-1	-1	0	0	0	0	0	0	RevComp BASPBJ0864_pilon len=20.26 kb 77.95% 7(-) 27,154,453:27,169,878; 29.30% 7(+);	GOOD|HAP|PART|SEC|ALT|NONE	PURE|DIP|UNIQ|TOP|PRI|COMP	-	HPURGE	PRIMARY	-	quarantine	1
BASENJICHR7.04	10053	14	13.6837	100	10053	9	18	0.3683	0.02	99.98	0	0	BASENJICHR12.01	BASENJICHR7.01	17.64	44.61	KEEP	0	0	1	1637.06	17	41726.1	0.36516	99.6609	0	0	FALSE	FALSE	-1	-1	0	0	0	0	0	0	RevComp BASPBJ1095_pilon len=10.05 kb 100.00% 7(-) 50,183,635:50,193,693;	PURE|HAP|PART|NON|PRI|NONE	PURE|DIP|UNIQ|TOP|PRI|COMP|+VEC	PURE|DIP|UNIQ|TOP|PRI|COMP	HPURGE	PRIMARY	PRIMARY	quarantine	1
BASENJICHR7.05	8651	15	12.7755	100	8651	13	17	0.4251	23	77	0	0	BASENJICHR10.02	BASENJICHR3.01	99.78	269.3	REPEAT	0	0	12	2138.23	555	74400	0.40724	88.9855	0	0	FALSE	FALSE	-1	-1	0	0	0	0	0	0	BASPBJ0457_pilon len=8.651 kb 27.80% 7(+) 6,492,879:6,495,288; 178.60% other;	GOOD|HAP|REPT|NON|REP|NONE	GOOD|EXS|REPT|TOP|ALT|NONE	PURE|DIP|UNIQ|TOP|PRI|COMP|+VEC	HPURGE	PRIMARY	PRIMARY	quarantine	1
BASENJICHR7.06	7832	7	8.7794	100	7832	10	10	0.3581	50.54	49.46	0	0	BASENJICHR7.01	BASENJICHR8.01	52.82	54.8	KEEP	0	0	1	137.627	13	4198.32	0.36849	65.5778	0	0	FALSE	FALSE	-1	-1	0	0	0	0	0	0	RevComp BASPBJ1002_pilon len=7.832 kb 50.19% 7(-) 25,615,171:25,619,101;	GOOD|LOW|HOMO|NON|PRI|NONE	PURE|DIP|UNIQ|TOP|PRI|COMP	PURE|DIP|UNIQ|TOP|PRI|COMP|+VEC	HPURGE	PRIMARY	PRIMARY	quarantine	1
BASENJICHR7.07	6358	18	22.4569	100	6358	6	49	0.4161	0.016	72.63	27.35	0	BASENJICHR15.01	BASENJICHR4.01	48.35	206.23	KEEP	0	0	21	1754.86	464	63174.8	0.42954	78.3954	0	0	FALSE	FALSE	-1	-1	0	0	0	0	0	0	BASPBJ0751_pilon len=6.358 kb 43.02% 7(+) 52,562,044:52,564,784; 123.07% other; Diploidocus:PRIMARY|PRIMARY|PRIMARY|PRIMARY|PRIMARY|PRIMARY	GOOD|HAP|PART|NON|REP|NONE	PURE|DIP|UNIQ|TOP|PRI|COMP	PURE|DIP|UNIQ|SEC|PRI|COMP|+VEC	PRIMARY	PRIMARY	PRIMARY	keep	7
BASENJICHR7.08	6158	19	18.6671	100	6158	12	25	0.4383	0	100	0	0	BASENJICHR7.01	-	47.84	47.84	KEEP	0	0	2	1310.18	35	47307.9	0.45615	92.4005	0	0	FALSE	FALSE	-1	-1	0	0	0	0	0	0	BASPBJ1064_pilon len=6.158 kb 97.16% 7(+) 19,964,100:19,970,096;	PURE|HAP|PART|NON|ALT|NONE	PURE|DIP|UNIQ|TOP|PRI|COMP	-	HPURGE	PRIMARY	-	quarantine	1
BASENJICHR7.09	5224	30	30.5718	100	5224	1	75	0.3996	4.632	40.7	54.67	0	BASENJICHRX.01X	BASENJICHR9.01	85.87	635.18	KEEP	0	0	1810	2242.09	73430	93754.3	0.42879	86.6872	0	0	FALSE	FALSE	-1	-1	0	0	0	0	0	0	BASPBJ1079_pilon len=5.224 kb 62.25% 7(+) 12,781,288:12,784,553; Diploidocus:PRIMARY|PRIMARY|PRIMARY|PRIMARY|PRIMARY|PRIMARY	GOOD|DIP|REPT|NON|REP|NONE	PURE|DIP|UNIQ|TOP|PRI|NONE|+TEL|+VEC	PURE|DIP|UNIQ|TOP|PRI|COMP	PRIMARY	PRIMARY	PRIMARY	keep	7
BASENJICHR7.10	3816	103	89.364	100	3816	168	2	0.3836	0.105	3.721	18.97	77.2	BASENJICHR9.01	BASENJICHR11.01	85.27	345.28	KEEP	0	0	2562	2805.8	110866	114271	0.38915	88.496	0	0	FALSE	FALSE	-1	-1	0	0	0	0	0	0	BASPBJ1156_pilon len=3.816 kb 82.42% 7(+) 69,271,159:69,274,315; 143.00% other; Diploidocus:COLLAPSED|COLLAPSED|COLLAPSED|COLLAPSED|COLLAPSED|COLLAPSED	GOOD|EXS|REPT|NON|REP|NONE	PURE|DIP|UNIQ|TOP|PRI|COMP	PURE|DIP|UNIQ|TOP|PRI|COMP	COLLAPSED	PRIMARY	PRIMARY	repeat	7
BASENJICHR8.01	136760998	35	35.7913	99.987	136743240	286965	286981	0.399	0.08396	5.905	93.81	0.201	-	-	0	0	KEEP	4	8	1	850.384	37	21687.9	0.40432	99.564	2417	0	FALSE	FALSE	-1	-1	0	316	14	14	25	25	RevComp BASPBJ0362_pilon len=136.8 Mb 53.29% 8(-) 132:73,386,071; 0.11% 8(+); 46.01% other; Diploidocus:PRIMARY|PRIMARY|PRIMARY|PRIMARY|PRIMARY|PRIMARY	PURE|DIP|UNIQ|TOP|PRI|COMP|+VEC	-	-	PRIMARY	-	-	keep	7
BASENJICHR8.02	1079395	45	68.5997	99.6058	1075140	6652	6410	0.41	1.731	12.69	58.34	27.24	BASENJICHR8.01	BASENJICHR8.04	63.91	264.64	KEEP	5	1	2	1069.55	84	33848	0.41724	90.569	0	0	FALSE	FALSE	-1	-1	0	0	0	0	175	175	BASPBJ0435_pilon len=1.079 Mb 73.19% 8(+) 73,387,455:74,330,063; 22.27% 8(-); 11.65% other; Diploidocus:PRIMARY|PRIMARY|PRIMARY|PRIMARY|PRIMARY|PRIMARY	GOOD|DIP|REPT|TOP|ALT|NONE	PURE|DIP|UNIQ|TOP|PRI|COMP|+VEC	GOOD|DIP|REPT|SEC|PRI|NONE	PRIMARY	PRIMARY	PRIMARY	keep	7
BASENJICHR8.03	97406	52	59.7405	100	97406	391	328	0.4933	0.036	11.91	54.79	33.27	BASENJICHR11.02	BASENJISCAFF0299	90.01	895.69	KEEP	1	3	1951	2213.23	206123	259473	0.49842	99.1959	0	0	FALSE	FALSE	-1	-1	0	0	0	0	0	0	BASPBJ1308_pilon len=97.41 kb 7.96% 8(+) 8,055,639:8,059,517; 30.30% other; Diploidocus:PRIMARY|PRIMARY|PRIMARY|PRIMARY|PRIMARY|PRIMARY	GOOD|DIP|REPT|TOP|REP|NONE	GOOD|DIP|REPT|TOP|REP|NONE	GOOD|EXS|REPT|TOP|REP|NONE	PRIMARY	PRIMARY	PRIMARY	keep	7
BASENJICHR8.04	47972	58	56.1125	99.9812	47963	168	234	0.4089	0.5277	10.59	57.31	31.57	BASENJICHR8.02	BASENJICHR8.01	89.83	1070.91	KEEP	0	2	1	869.885	31	26978.3	0.40438	55.6376	0	0	FALSE	FALSE	-1	-1	0	0	0	0	0	0	BASPBJ0838_pilon len=47.97 kb 34.62% 8(+) 73,466,246:74,074,465; Diploidocus:PRIMARY|PRIMARY|PRIMARY|PRIMARY|PRIMARY|PRIMARY	GOOD|DIP|REPT|SEC|PRI|NONE	GOOD|DIP|REPT|TOP|ALT|NONE	PURE|DIP|UNIQ|TOP|PRI|COMP|+VEC	PRIMARY	PRIMARY	PRIMARY	keep	7
BASENJICHR8.05	24741	184	181.077	99.9636	24732	416	390	0.4132	0.3153	1.907	5.638	92.14	-	-	0	0	JUNK	0	0	1	1020.28	96	25905	0.4208	86.2877	0	0	FALSE	FALSE	-1	-1	0	0	0	0	0	0	BASPBJ0510_pilon len=24.74 kb 118.52% 8(+) 73,730,805:74,137,717; Diploidocus:COLLAPSED|COLLAPSED|COLLAPSED|COLLAPSED|COLLAPSED|COLLAPSED	PURE|EXS|UNIQ|NON|PRI|NONE	-	-	COLLAPSED	-	-	repeat	7
BASENJICHR8.06	19066	111	112.188	100	19066	160	170	0.4004	0.073	0	0.01	99.92	-	-	0	0	JUNK	0	0	1	869.388	121	29402.3	0.40381	98.729	0	0	FALSE	FALSE	-1	-1	0	0	0	0	0	0	BASPBJ0958_pilon len=19.07 kb 21.20% 8(+) 2,210,863:2,418,472; 23.06% other; Diploidocus:COLLAPSED|COLLAPSED|COLLAPSED|COLLAPSED|COLLAPSED|COLLAPSED	PURE|EXS|UNIQ|NON|PRI|NONE	-	-	COLLAPSED	-	-	repeat	7
BASENJICHR8.07	19019	77	66.6917	99.9895	19017	99	122	0.4116	5.153	1.088	33.85	59.91	BASENJICHR8.02	BASENJICHR8.01	94.33	1194.08	KEEP	0	0	2	1086.78	109	32577	0.41664	93.882	0	0	FALSE	FALSE	-1	-1	0	0	0	0	0	0	RevComp BASPBJ0902_pilon len=19.02 kb 130.45% 8(-) 73,597,406:73,728,436; Diploidocus:PRIMARY|PRIMARY|PRIMARY|PRIMARY|PRIMARY|PRIMARY	GOOD|EXS|REPT|NON|ALT|NONE	GOOD|DIP|REPT|TOP|ALT|NONE	PURE|DIP|UNIQ|TOP|PRI|COMP|+VEC	PRIMARY	PRIMARY	PRIMARY	keep	7
BASENJICHR8.08	14452	37	65.222	99.9723	14448	85	95	0.388	0.02768	26.22	29.21	44.55	BASENJICHR8.02	BASENJICHR8.04	64.81	472.89	KEEP	0	0	1	677.16	12	24876.4	0.37974	51.6359	0	0	FALSE	FALSE	-1	-1	0	0	0	0	0	0	BASPBJ1347_pilon len=14.45 kb 30.95% 8(+) 73,623,658:73,628,193; 3.76% other; Diploidocus:PRIMARY|PRIMARY|PRIMARY|PRIMARY|PRIMARY|PRIMARY	WEAK|EXS|REPT|NON|PRI|NONE	GOOD|DIP|REPT|TOP|ALT|NONE	GOOD|DIP|REPT|SEC|PRI|NONE	PRIMARY	PRIMARY	PRIMARY	keep	7
BASENJICHR8.09	13671	76	79.7094	99.9927	13670	115	126	0.4059	0.01431	0	1.068	98.92	-	-	0	0	JUNK	0	0	2	2264.62	135	70985.7	0.4116	98.7248	0	0	FALSE	FALSE	-1	-1	0	0	0	0	0	0	RevComp BASPBJ0957_pilon len=13.67 kb 185.83% 8(-) 2,267,940:2,402,409; 55.14% 8(+); 7.07% other; Diploidocus:COLLAPSED|COLLAPSED|COLLAPSED|COLLAPSED|COLLAPSED|COLLAPSED	PURE|EXS|UNIQ|NON|ALT|NONE	-	-	COLLAPSED	-	-	repeat	7
BASENJICHR8.10	9076	16	15.3889	99.9669	9073	14	12	0.3771	0.154	99.85	0	0	BASENJICHR8.01	-	23.38	23.38	KEEP	0	0	1	1287.4	16	37405.3	0.38277	84.8619	0	0	FALSE	FALSE	-1	-1	0	0	0	0	0	0	RevComp BASPBJ0081_pilon len=9.076 kb 84.53% 8(-) 38,038,254:38,045,947;	PURE|HAP|PART|NON|PRI|NONE	PURE|DIP|UNIQ|TOP|PRI|COMP|+VEC	-	HPURGE	PRIMARY	-	quarantine	1
BASENJICHR8.11	7956	151	112.889	100	7956	90	197	0.3949	0	0	44.83	55.17	BASENJICHR8.02	BASENJICHR8.01	58.2	816.94	KEEP	0	0	1	384.015	53	14515.5	0.3997	62.0807	0	0	FALSE	FALSE	-1	-1	0	0	0	0	0	0	RevComp BASPBJ0903_pilon len=7.956 kb 7.84% 8(-) 73,586,213:73,586,838; Diploidocus:PRIMARY|PRIMARY|PRIMARY|PRIMARY|PRIMARY|PRIMARY	GOOD|EXS|REPT|NON|PRI|NONE	GOOD|DIP|REPT|TOP|ALT|NONE	PURE|DIP|UNIQ|TOP|PRI|COMP|+VEC	PRIMARY	PRIMARY	PRIMARY	keep	7
BASENJICHR8.12	7692	25	24.945	99.922	7686	20	24	0.4419	0.078	61.18	38.74	0	BASENJICHR8.01	BASENJICHRX.01X	52.41	173.26	KEEP	0	0	1	1501.75	22	47531.4	0.45944	88.0772	0	0	FALSE	FALSE	-1	-1	0	0	0	0	0	0	BASPBJ0072_pilon len=7.692 kb 88.03% 8(+) 623,809:630,597; Diploidocus:PRIMARY|PRIMARY|PRIMARY|PRIMARY|PRIMARY|PRIMARY	GOOD|HAP|HOMO|NON|PRI|NONE	PURE|DIP|UNIQ|TOP|PRI|COMP|+VEC	PURE|DIP|UNIQ|TOP|PRI|NONE|+TEL|+VEC	PRIMARY	PRIMARY	PRIMARY	keep	7
BASENJICHR8.13	7381	2	7.3669	99.8645	7371	23	23	0.397	68.3	28.63	3.076	0	BASENJICHR8.02	BASENJICHR8.01	96.45	876.51	REPEAT	0	0	1	137.433	0	4455.68	0.41471	47.9946	0	0	FALSE	FALSE	-1	-1	0	0	0	0	0	0	BASPBJ0392_pilon len=7.381 kb 45.56% 8(+) 73,388,524:73,688,591;	LOWX|LOW|REPT|NON|PRI|NONE	GOOD|DIP|REPT|TOP|ALT|NONE	PURE|DIP|UNIQ|TOP|PRI|COMP|+VEC	LOWCOV	PRIMARY	PRIMARY	junk	1
BASENJICHR8.14	5176	1	24.9279	100	5176	47	42	0.3851	59.54	3.941	23.55	12.96	BASENJICHR8.01	BASENJICHR11.01	98.15	240.11	HAPLOTIG	0	0	1	173.665	53	5175.96	0.39896	52.5437	0	0	FALSE	FALSE	-1	-1	0	0	0	0	0	0	BASPBJ0766_pilon len=5.176 kb 137.35% 8(+) 2,296,779:2,425,014;	LOWX|LOW|HOMO|NON|PRI|NONE	PURE|DIP|UNIQ|TOP|PRI|COMP|+VEC	PURE|DIP|UNIQ|TOP|PRI|COMP	LOWCOV	PRIMARY	PRIMARY	junk	1
BASENJICHR8.15	4749	51	49.2636	100	4749	45	35	0.4307	0.021	0	99.98	0	-	-	0	0	KEEP	0	0	2	1528.67	73	45276.5	0.4422	98.4967	0	0	FALSE	FALSE	-1	-1	0	0	0	0	0	0	BASPBJ0840_pilon len=4.749 kb 122.11% 8(+) 73,837,796:74,221,722; Diploidocus:PRIMARY|PRIMARY|PRIMARY|PRIMARY|PRIMARY|PRIMARY	PURE|DIP|UNIQ|NON|ALT|NONE	-	-	PRIMARY	-	-	keep	7
BASENJICHR8.16	2352	15	14.6224	100	2352	7	14	0.3961	0	100	0	0	BASENJICHR8.02	-	88.65	242.05	KEEP	0	0	2	1515.16	122	45787.2	0.38435	97.3345	0	0	FALSE	FALSE	-1	-1	0	0	0	0	0	0	BASPBJ0361_pilon len=2.352 kb 96.17% 8(+) 73,784,813:74,168,429;	PURE|HAP|HAPL|NON|ALT|NONE	GOOD|DIP|REPT|TOP|ALT|NONE	-	HPURGE	PRIMARY	-	quarantine	1
BASENJICHR8.17	532	6	5.6466	100	532	4	2	0.6248	100	0	0	0	-	-	0	0	JUNK	0	0	1	2.61462	10	55.3083	0.63722	54.3478	0	0	FALSE	FALSE	-1	-1	0	0	0	0	0	0	RevComp BASPBJ1394_pilon len=532 bp 67.67% 8(-) 281,375:281,735;	PURE|LOW|UNIQ|NON|PRI|NONE	-	-	HPURGE	-	-	quarantine	1
BASENJICHR9.01	61086659	34	35.3737	99.9095	61031348	126894	127366	0.4482	0.2145	8.494	89.32	1.968	-	-	0	0	KEEP	14	3	1	1004.04	36	26502.1	0.46274	99.2922	0	0	FALSE	FALSE	-1	-1	0	333	11	11	600	600	RevComp BASPBJ0847_pilon len=61.09 Mb 82.50% 9(-) 101:61,074,073; 16.02% 9(+); 0.09% other; Diploidocus:PRIMARY|PRIMARY|PRIMARY|PRIMARY|PRIMARY|PRIMARY	PURE|DIP|UNIQ|TOP|PRI|COMP	-	-	PRIMARY	-	-	keep	7
BASENJICHR9.02	967816	106	106.609	99.9916	967735	6890	6762	0.3802	2.26	5.427	23.83	68.48	BASENJICHR9.01	BASENJICHR18.01	24.32	28.48	KEEP	0	3	1	1012.8	138	24460	0.38535	94.8531	0	0	FALSE	FALSE	-1	-1	0	0	0	0	125	125	BASPBJ0627_pilon len=967.8 kb 46.05% 9(+) 7,671,677:18,200,405; 30.20% 9(-); 72.70% other; Diploidocus:PRIMARY|PRIMARY|PRIMARY|PRIMARY|PRIMARY|PRIMARY	GOOD|EXS|PART|SEC|PRI|NONE	PURE|DIP|UNIQ|TOP|PRI|COMP	PURE|DIP|UNIQ|TOP|PRI|COMP|+VEC	PRIMARY	PRIMARY	PRIMARY	keep	7
BASENJICHR9.03	43440	65	112.227	99.9125	43402	860	886	0.4456	1.664	4.406	49.03	44.9	BASENJICHR9.01	BASENJICHR28.01	90.88	365	KEEP	1	1	10	1042.78	986	76168.3	0.50327	94.3567	0	0	FALSE	FALSE	-1	-1	0	0	0	0	0	0	RevComp BASPBJ0357_pilon len=43.44 kb 17.64% 9(-) 10,285,401:18,025,754; 10.26% 9(+); 7.10% other; Diploidocus:PRIMARY|PRIMARY|PRIMARY|PRIMARY|PRIMARY|PRIMARY	WEAK|DIP|REPT|TOP|REP|NONE	PURE|DIP|UNIQ|TOP|PRI|COMP	PURE|DIP|UNIQ|TOP|PRI|COMP	PRIMARY	PRIMARY	PRIMARY	keep	7
BASENJICHR9.04	22129	50	47.8568	99.9729	22123	62	70	0.3698	10.55	16.5	38.18	34.77	BASENJICHR9.01	BASENJICHR9.02	98.15	191.79	HAPLOTIG	0	0	3	719.158	118	20827.5	0.36839	89.8882	0	0	FALSE	FALSE	-1	-1	0	0	0	0	0	0	BASPBJ0858_pilon len=22.13 kb 132.13% 9(+) 17,368,970:18,124,865; 60.80% 9(-); 96.22% other; Diploidocus:PRIMARY|PRIMARY|PRIMARY|PRIMARY|PRIMARY|PRIMARY	WEAK|DIP|HOMO|NON|REP|NONE	PURE|DIP|UNIQ|TOP|PRI|COMP	GOOD|EXS|PART|SEC|PRI|NONE	PRIMARY	PRIMARY	PRIMARY	keep	7
BASENJICHR9.05	20864	69	80.4016	99.9521	20854	104	121	0.4933	3.94	8.743	37.08	50.23	BASENJICHR9.01	BASENJICHR9.02	67.73	131.33	KEEP	0	0	2	923.944	145	36298.2	0.50522	77.493	0	0	FALSE	FALSE	-1	-1	0	0	0	0	0	0	BASPBJ0875_pilon len=20.86 kb 188.25% 9(+) 7,373,639:28,459,542; 6.15% 9(-); 74.41% other; Diploidocus:PRIMARY|PRIMARY|PRIMARY|PRIMARY|PRIMARY|PRIMARY	GOOD|EXS|HOMO|NON|ALT|NONE	PURE|DIP|UNIQ|TOP|PRI|COMP	GOOD|EXS|PART|SEC|PRI|NONE	PRIMARY	PRIMARY	PRIMARY	keep	7
BASENJICHR9.06	14250	169	166.699	99.9368	14241	209	223	0.3791	0.1471	0	0	99.85	-	-	0	0	JUNK	0	0	1	349.843	174	13851.9	0.38288	91.6479	0	0	FALSE	FALSE	-1	-1	0	0	0	0	0	0	RevComp BASPBJ0308_pilon len=14.25 kb 147.48% 9(-) 8,783,794:16,659,210; Diploidocus:COLLAPSED|COLLAPSED|COLLAPSED|COLLAPSED|COLLAPSED|COLLAPSED	PURE|EXS|UNIQ|NON|PRI|NONE	-	-	COLLAPSED	-	-	repeat	7
BASENJICHR9.07	13646	14	14.5892	100	13646	32	40	0.3935	15.51	80.29	4.199	0	BASENJICHR9.01	BASENJICHR14.01	99.3	144.35	HAPLOTIG	0	0	2	1190.37	195	35956.6	0.40407	90.6314	0	0	FALSE	FALSE	-1	-1	0	0	0	0	0	0	RevComp BASPBJ1127_pilon len=13.65 kb 192.06% 9(-) 10,290,118:18,039,720; 96.03% 9(+); 38.22% other;	PURE|HAP|HOMO|NON|ALT|NONE	PURE|DIP|UNIQ|TOP|PRI|COMP	PURE|DIP|UNIQ|SEC|PRI|COMP	HPURGE	PRIMARY	PRIMARY	quarantine	1
BASENJICHR9.08	10046	1	1.2349	86.9102	8731	5	4	0.5221	100	0	0	0	-	-	0	0	JUNK	0	0	1	388.363	0	8863.28	0.52986	30.2695	0	0	FALSE	FALSE	-1	-1	0	0	0	0	0	0	BASPBJ0430_pilon len=10.05 kb 19.84% 9(+) 10,359,577:10,361,589;	LOWX|LOW|UNIQ|NON|PRI|NONE	-	-	LOWCOV	-	-	junk	1
BASENJICHR9.09	8768	34	37.9737	100	8768	82	87	0.3694	3.079	7.881	80.82	8.223	-	-	0	0	KEEP	0	1	3	304.994	177	5891.12	0.36759	100	0	0	FALSE	FALSE	-1	-1	0	0	0	0	0	0	RevComp BASPBJ0618_pilon len=8.768 kb 144.15% 9(-) 17,118,081:17,345,694; Diploidocus:PRIMARY|PRIMARY|PRIMARY|PRIMARY|PRIMARY|PRIMARY	PURE|DIP|UNIQ|SEC|REP|NONE	-	-	PRIMARY	-	-	keep	7
BASENJICHR9.10	7231	2	2.1574	93.7076	6776	4	2	0.3745	100	0	0	0	-	-	0	0	JUNK	0	0	1	103.182	0	2787.27	0.37602	46.204	0	0	FALSE	FALSE	-1	-1	0	0	0	0	0	0	BASPBJ0018_pilon len=7.231 kb 46.00% 9(+) 47,312,281:47,315,915;	LOWX|LOW|UNIQ|NON|PRI|NONE	-	-	LOWCOV	-	-	junk	1
BASENJICHR9.11	6415	4	10.8924	96.9602	6220	12	19	0.4406	58.97	41.03	0	0	BASENJICHR9.01	BASENJICHR8.01	94.03	230.68	KEEP	0	0	2	1273.44	41	47096.5	0.42899	82.4229	0	0	FALSE	FALSE	-1	-1	0	0	0	0	0	0	BASPBJ0189_pilon len=6.415 kb 41.03% 9(+) 38,994,765:38,997,396; 6.69% other;	GOOD|LOW|HOMO|NON|ALT|NONE	PURE|DIP|UNIQ|TOP|PRI|COMP	PURE|DIP|UNIQ|TOP|PRI|COMP|+VEC	HPURGE	PRIMARY	PRIMARY	quarantine	1
BASENJICHR9.12	6014	73	72.6164	100	6014	52	58	0.4218	0	0	6.967	93.03	-	-	0	0	JUNK	0	0	2271	2646.1	96760	108345	0.43981	98.8644	0	0	FALSE	FALSE	-1	-1	0	0	0	0	0	0	BASPBJ0201_pilon len=6.014 kb 291.64% 9(+) 7,523,076:16,681,968; 298.15% other; Diploidocus:COLLAPSED|COLLAPSED|COLLAPSED|COLLAPSED|COLLAPSED|COLLAPSED	PURE|EXS|UNIQ|NON|REP|NONE	-	-	COLLAPSED	-	-	repeat	7
BASENJICHR9.13	4560	7	6.727	100	4560	4	6	0.3982	61.69	38.31	0	0	BASENJICHR9.01	BASENJICHR7.01	21.58	27.02	KEEP	0	0	3046	4899.7	128870	178470	0.40395	95.4565	0	0	FALSE	FALSE	-1	-1	0	0	0	0	0	0	RevComp BASPBJ0548_pilon len=4.56 kb 179.87% 9(-) 7,667,402:8,757,321; 57.37% other;	GOOD|LOW|PART|NON|REP|NONE	PURE|DIP|UNIQ|TOP|PRI|COMP	PURE|DIP|UNIQ|TOP|PRI|COMP	HPURGE	PRIMARY	PRIMARY	quarantine	1
BASENJICHR9.14	4011	2	1.7385	97.4321	3908	5	2	0.3489	100	0	0	0	-	-	0	0	JUNK	0	0	2	70.3272	128	2028.68	0.35278	67.9297	0	0	FALSE	FALSE	-1	-1	0	0	0	0	0	0	BASPBJ1014_pilon len=4.011 kb 81.70% 9(+) 8,770,051:8,773,354; 80.60% other;	LOWX|LOW|UNIQ|NON|ALT|NONE	-	-	LOWCOV	-	-	junk	1
BASENJICHR9.15	3931	75	70.3083	100	3931	44	45	0.4187	0	0	34.6	65.4	BASENJICHR9.01	BASENJICHR9.09	99.54	251.69	REPEAT	0	0	3	22.4894	243	785.304	0.42203	98.7196	0	0	FALSE	FALSE	-1	-1	0	0	0	0	0	0	BASPBJ0626_pilon len=3.931 kb 173.62% 9(+) 17,118,035:17,344,660; Diploidocus:PRIMARY|PRIMARY|PRIMARY|PRIMARY|PRIMARY|PRIMARY	GOOD|EXS|REPT|NON|REP|NONE	PURE|DIP|UNIQ|TOP|PRI|COMP	PURE|DIP|UNIQ|SEC|REP|NONE	PRIMARY	PRIMARY	PRIMARY	keep	7
BASENJICHR9.16	3428	78	61.7768	59.3641	2035	29	123	0.3836	41.37	0	0.2333	58.4	-	-	0	0	JUNK	0	0	1	2088.49	5	56989.5	0.39265	52.0282	0	0	FALSE	FALSE	-1	-1	0	0	0	0	0	0	BASPBJ0144_pilon len=3.428 kb 56.48% 9(+) 8,669,201:8,671,174; Diploidocus:COLLAPSED|COLLAPSED|COLLAPSED|COLLAPSED|COLLAPSED|COLLAPSED	GOOD|EXS|UNIQ|NON|PRI|NONE	-	-	COLLAPSED	-	-	repeat	7
BASENJICHR9.17	3208	35	38.365	96.0723	3082	0	83	0.3835	6.484	22.41	58.42	12.69	BASENJICHR9.01	BASENJICHR16.01	90.84	458.54	KEEP	0	0	2021	1935.98	86169	86263.2	0.4015	92.1433	0	0	FALSE	FALSE	-1	-1	0	0	0	0	0	0	RevComp BASPBJ1401_pilon len=3.208 kb 182.23% 9(-) 7,644,564:8,939,354; 383.17% other; Diploidocus:PRIMARY|PRIMARY|PRIMARY|PRIMARY|PRIMARY|PRIMARY	GOOD|DIP|REPT|NON|REP|NONE	PURE|DIP|UNIQ|TOP|PRI|COMP	PURE|DIP|UNIQ|TOP|PRI|COMP	PRIMARY	PRIMARY	PRIMARY	keep	7
BASENJICHR9.18	2641	5	5.5725	99.8107	2636	0	12	0.4585	68.35	31.65	0	0	BASENJICHRX.01X	BASENJICHR9.01	89.81	424.27	KEEP	0	0	1058	1419.91	43486	63896	0.45286	83.2887	0	0	FALSE	FALSE	-1	-1	0	0	0	0	0	0	RevComp BASPBJ1112_pilon len=2.641 kb 124.57% 9(-) 7,644,561:8,938,062;	GOOD|LOW|REPT|NON|REP|NONE	PURE|DIP|UNIQ|TOP|PRI|NONE|+TEL|+VEC	PURE|DIP|UNIQ|TOP|PRI|COMP	HPURGE	PRIMARY	PRIMARY	quarantine	1
BASENJICHRX.01X	125251208	35	35.6221	99.939	125174774	261605	262327	0.3989	0.454	5.33	93.8	0.4198	-	-	0	0	KEEP	6	6	1	1041.02	38	29366.6	0.40329	99.4982	1044	0	TRUE	FALSE	0	0	1.85872	0	0	0	4754	4754	BASPBJ0741_pilon len=125.3 Mb 96.78% X(+) 7,095:123,869,048; 3.72% X(-); 0.08% other; (Vecscreen:masked) Diploidocus:PRIMARY|PRIMARY|PRIMARY|PRIMARY|PRIMARY|PRIMARY	PURE|DIP|UNIQ|TOP|PRI|NONE|+TEL|+VEC	-	-	PRIMARY	-	-	keep	7
BASENJICHRX.02	51938	36	38.151	99.9961	51936	134	177	0.4496	5.002	5.062	89.85	0.085	-	-	0	0	KEEP	0	0	2	1055.18	122	30634.7	0.45285	96.6154	0	0	FALSE	FALSE	-1	-1	0	0	0	0	0	0	RevComp BASPBJ0063_pilon len=51.94 kb 59.75% X(-) 121,005,258:121,042,357; 44.18% X(+); Diploidocus:PRIMARY|PRIMARY|PRIMARY|PRIMARY|PRIMARY|PRIMARY	PURE|DIP|UNIQ|NON|ALT|NONE	-	-	PRIMARY	-	-	keep	7
BASENJICHRX.03	29626	381	314.119	100	29626	547	527	0.5069	0	0.219	20.1	79.68	BASENJISCAFF0284	BASENJISCAFF1053	74.75	218.17	KEEP	1	0	737	1630.61	281574	309497	0.49237	99.1487	0	0	FALSE	FALSE	-1	-1	0	0	0	0	0	0	RevComp BASPBJ0916_pilon len=29.63 kb 33.13% X(-) 68,571,309:110,147,727; 5.80% X(+); 164.96% other; Diploidocus:COLLAPSED|PRIMARY|PRIMARY|PRIMARY|PRIMARY|PRIMARY	GOOD|EXS|HOMO|TOP|REP|NONE	GOOD|EXS|HOMO|TOP|REP|NONE	GOOD|EXS|REPT|TOP|REP|NONE	PRIMARY	PRIMARY	PRIMARY	keep	7
BASENJICHRX.04	29612	18	27.7507	99.973	29604	57	69	0.5058	16.3	37.85	45.86	0	BASENJICHRX.01X	-	99.88	708.65	REPEAT	0	0	2	408.499	110	11512.2	0.56609	90.5462	0	0	FALSE	FALSE	-1	-1	0	0	0	0	0	0	BASPBJ1103_pilon len=29.61 kb 120.39% X(+) 117,693,334:118,263,647; 11.02% X(-); Diploidocus:PRIMARY|PRIMARY|PRIMARY|PRIMARY|PRIMARY|PRIMARY	WEAK|DIP|HAPL|NON|ALT|NONE	PURE|DIP|UNIQ|TOP|PRI|NONE|+TEL|+VEC	-	PRIMARY	PRIMARY	-	keep	7
BASENJICHRX.05	21233	1	2.8741	99.9199	21216	22	25	0.4354	93.87	0.01399	6.113	0	-	-	0	0	JUNK	0	0	1	203.36	0	5483.54	0.52456	23.1999	0	0	FALSE	FALSE	-1	-1	0	0	0	0	0	0	BASPBJ0222_pilon len=21.23 kb 6.42% X(+) 117,689,533:117,693,360;	LOWX|LOW|UNIQ|NON|PRI|NONE	-	-	LOWCOV	-	-	junk	1
BASENJICHRX.06	19034	11	10.9457	99.9264	19020	10	12	0.5024	20.8	79.2	0	0	BASENJICHRX.01X	-	99.7	943.35	REPEAT	0	0	1	410.184	0	5932.28	0.54991	42.2506	0	0	FALSE	FALSE	-1	-1	0	0	0	0	0	0	RevComp BASPBJ0523_pilon len=19.03 kb 97.67% X(-) 117,573,646:118,112,300;	GOOD|HAP|HAPL|NON|PRI|NONE	PURE|DIP|UNIQ|TOP|PRI|NONE|+TEL|+VEC	-	HPURGE	PRIMARY	-	quarantine	1
BASENJICHRX.07	11822	1	2.0881	62.2822	7363	9	6	0.3803	93.52	6.479	0	0	-	-	0	0	JUNK	0	0	1	843.706	0	27121.4	0.4188	31.7735	0	0	FALSE	FALSE	-1	-1	0	0	0	0	0	0	RevComp BASPBJ0470_pilon len=11.82 kb 15.59% X(-) 46,435,088:46,436,930; 9.97% other;	LOWX|LOW|UNIQ|NON|PRI|NONE	-	-	LOWCOV	-	-	junk	1
BASENJICHRX.08	7213	27	27.6282	99.903	7206	25	21	0.4143	0.4577	7.57	91.97	0	-	-	0	0	KEEP	0	0	1873	2959.7	71615	110827	0.42007	93.4743	0	0	FALSE	FALSE	-1	-1	0	0	0	0	0	0	BASPBJ0892_pilon len=7.213 kb 19.49% X(+) 43,984,466:120,131,976; 6.97% X(-); 45.28% other; Diploidocus:PRIMARY|PRIMARY|PRIMARY|PRIMARY|PRIMARY|PRIMARY	PURE|DIP|UNIQ|NON|REP|NONE	-	-	PRIMARY	-	-	keep	7
BASENJICHRX.09	6850	1	1.1739	99.3869	6808	4	2	0.4919	100	0	0	0	-	-	0	0	JUNK	0	0	1	478.965	0	10423.3	0.53927	31.8142	0	0	FALSE	FALSE	-1	-1	0	0	0	0	0	0	BASPBJ0378_pilon len=6.85 kb 8.63% X(+) 118,324,166:118,324,752;	LOWX|LOW|UNIQ|NON|PRI|NONE	-	-	LOWCOV	-	-	junk	1
BASENJICHRX.10	5523	206	195.768	100	5523	382	8	0.4057	0.018	0	2.462	97.52	-	-	0	0	JUNK	0	0	1765	2126.82	73165	88709.7	0.43998	86.72	0	0	FALSE	FALSE	-1	-1	0	0	0	0	0	0	RevComp BASPBJ0856_pilon len=5.523 kb 78.98% X(-) 77,683,029:77,687,418; 256.62% other; Diploidocus:COLLAPSED|COLLAPSED|COLLAPSED|COLLAPSED|COLLAPSED|COLLAPSED	PURE|EXS|UNIQ|NON|REP|NONE	-	-	COLLAPSED	-	-	repeat	7
BASENJICHRX.11	5129	184	172.645	100	5129	97	112	0.477	5.752	0	0.175	94.07	-	-	0	0	JUNK	0	0	2	449.615	235	13166.3	0.48684	97.3349	0	0	FALSE	FALSE	-1	-1	0	0	0	0	0	0	RevComp BASPBJ0733_pilon len=5.129 kb 5.73% X(-) 121,508,851:121,509,143; Diploidocus:COLLAPSED|COLLAPSED|COLLAPSED|COLLAPSED|COLLAPSED|COLLAPSED	PURE|EXS|UNIQ|NON|ALT|NONE	-	-	COLLAPSED	-	-	repeat	7
BASENJICHRX.12	5114	4	4.3209	96.7345	4947	5	9	0.3969	86.66	13.34	0	0	-	-	0	0	JUNK	0	0	3	1253.85	70	36387.3	0.42765	92.3742	0	0	FALSE	FALSE	-1	-1	0	0	0	0	0	0	BASPBJ0173_pilon len=5.114 kb 183.65% X(+) 48,170,106:48,282,202;	PURE|LOW|UNIQ|NON|REP|NONE	-	-	HPURGE	-	-	quarantine	1
BASENJICHRX.13	4542	12	8.697	83.3774	3787	17	5	0.3581	44.39	55.61	0	0	BASENJICHRX.01X	BASENJICHR12.01	98.48	256.78	REPEAT	0	0	2	2946.62	47	83851.2	0.36482	91.6519	0	0	FALSE	FALSE	-1	-1	0	0	0	0	0	0	RevComp BASPBJ0135_pilon len=4.542 kb 96.10% X(-) 94,506,054:94,510,805;	GOOD|HAP|REPT|NON|ALT|NONE	PURE|DIP|UNIQ|TOP|PRI|NONE|+TEL|+VEC	PURE|DIP|UNIQ|TOP|PRI|COMP|+VEC	HPURGE	PRIMARY	PRIMARY	quarantine	1
BASENJICHRX.14	4101	20	19.0978	100	4101	1	51	0.4256	27.41	31.28	41.31	0	BASENJICHR7.01	BASENJICHR1.01	89.71	267.93	KEEP	0	0	5	810.987	89	34825.4	0.42087	61.4969	0	0	FALSE	FALSE	-1	-1	0	0	0	0	0	0	BASPBJ0259_pilon len=4.101 kb 28.72% X(+) 48,071,413:48,072,598; 22.38% other; Diploidocus:PRIMARY|PRIMARY|PRIMARY|PRIMARY|PRIMARY|PRIMARY	WEAK|DIP|REPT|NON|REP|NONE	PURE|DIP|UNIQ|TOP|PRI|COMP	PURE|DIP|UNIQ|SEC|PRI|COMP|+VEC	PRIMARY	PRIMARY	PRIMARY	keep	7
BASENJICHRX.15	2716	20	17.8965	91.4212	2483	15	11	0.3809	8.615	91.38	0	0	BASENJICHRX.01X	BASENJICHR24.01	10.49	12.08	KEEP	0	0	1	67.5409	20	2999.95	0.39212	92.3792	0	0	FALSE	FALSE	-1	-1	0	0	0	0	0	0	BASPBJ0648_pilon len=2.716 kb 91.38% X(+) 99,360,879:99,363,360;	PURE|HAP|PART|NON|PRI|NONE	PURE|DIP|UNIQ|TOP|PRI|NONE|+TEL|+VEC	PURE|DIP|UNIQ|TOP|PRI|COMP|+VEC	HPURGE	PRIMARY	PRIMARY	quarantine	1
BASENJICHRX.16	2016	15	15.1895	100	2016	10	10	0.4821	0.05	99.95	0	0	BASENJICHRX.01X	BASENJICHR8.01	96.73	431.7	REPEAT	0	0	1	4.04171	41	155.689	0.5248	98.0402	0	0	FALSE	FALSE	-1	-1	0	0	0	0	0	0	RevComp BASPBJ0257_pilon len=2.016 kb 89.04% X(-) 117,689,897:117,691,692;	PURE|HAP|REPT|NON|PRI|NONE	PURE|DIP|UNIQ|TOP|PRI|NONE|+TEL|+VEC	PURE|DIP|UNIQ|TOP|PRI|COMP|+VEC	HPURGE	PRIMARY	PRIMARY	quarantine	1
BASENJICHRX.17	2000	0	0	0	0	0	0	0	100	0	0	0	-	-	0	0	KEEP	0	0	3	117.365	64	4511.04	0.365	79.8885	0	0	FALSE	FALSE	-1	-1	0	0	0	0	0	0	RevComp BASPBJ0069_pilon len=2.0 kb 98.85% X(-) 102,498,812:102,500,803;	LOWX|LOW|UNIQ|NON|REP|NONE	-	-	LOWCOV	-	-	junk	1
BASENJICHRX.18	1653	2	2.389	99.879	1651	2	1	0.5424	100	0	0	0	-	-	0	0	JUNK	0	0	1	1.76214	0	74.3227	0.54083	49.3546	0	0	FALSE	FALSE	-1	-1	0	0	0	0	0	0	RevComp BASPBJ0588_pilon len=1.653 kb 60.74% X(-) 117,725,197:117,726,192;	LOWX|LOW|UNIQ|NON|PRI|NONE	-	-	LOWCOV	-	-	junk	1
BASENJICHRX.19	807	7	6.347	100	807	11	1	0.3712	65.06	34.94	0	0	BASENJICHR17.01	BASENJICHR13.10	81.41	127.39	KEEP	0	0	2386	1968.35	89848	80370.2	0.37794	93.726	0	0	FALSE	FALSE	-1	-1	0	0	0	0	0	0	BASPBJ0386_pilon len=807 bp 98.76% X(+) 77,684,926:77,685,723;	GOOD|LOW|HOMO|NON|REP|NONE	PURE|DIP|UNIQ|TOP|PRI|COMP|+VEC	GOOD|HAP|HOMO|SEC|REP|NONE	HPURGE	PRIMARY	HPURGE	quarantine	1
BASENJISCAFF0001	614	1	1	100	614	0	1	0.5316	100	0	0	0	-	-	0	0	JUNK	0	0	1	1.53571	0	124.228	0.54397	15.136	0	0	FALSE	FALSE	-1	-1	0	0	0	0	0	0	BASPBJ0001_pilon (Unplaced)	LOWX|LOW|UNIQ|NON|PRI|NONE	-	-	LOWCOV	-	-	junk	1
BASENJISCAFF0002	5583	60	63.7412	100	5583	86	92	0.5489	0	0	68.62	31.38	BASENJICHR35.02	BASENJISCAFF0110	46.18	100.84	KEEP	0	1	11	154.603	5894	27090.4	0.56977	94.7814	0	0	FALSE	FALSE	-1	-1	0	0	0	0	0	0	BASPBJ0002_pilon (Unplaced) Diploidocus:PRIMARY|PRIMARY|PRIMARY|PRIMARY|PRIMARY|PRIMARY	GOOD|DIP|PART|SEC|REP|NONE	GOOD|EXS|REPT|TOP|REP|NONE	GOOD|DIP|PART|SEC|REP|NONE	PRIMARY	PRIMARY	PRIMARY	keep	7
BASENJISCAFF0003	2080	75	71.3048	100	2080	101	15	0.5055	0	1.298	29.76	68.94	BASENJISCAFF1053	BASENJISCAFF0284	95.05	3397.55	KEEP	0	0	458	955.49	257968	273897	0.51442	88.8997	0	0	FALSE	FALSE	-1	-1	0	0	0	0	0	0	BASPBJ0003_pilon (Unplaced) Diploidocus:PRIMARY|PRIMARY|PRIMARY|PRIMARY|PRIMARY|PRIMARY	GOOD|EXS|REPT|NON|REP|NONE	GOOD|EXS|REPT|TOP|REP|NONE	GOOD|EXS|HOMO|TOP|REP|NONE	PRIMARY	PRIMARY	PRIMARY	keep	7
BASENJISCAFF0004	4598	185	187.383	99.826	4590	163	183	0.5504	0.2389	0	0	99.76	-	-	0	0	JUNK	0	0	4	112.969	2136	20968.9	0.56764	94.6632	0	0	FALSE	FALSE	-1	-1	0	0	0	0	0	0	BASPBJ0004_pilon (Unplaced) Diploidocus:COLLAPSED|COLLAPSED|COLLAPSED|COLLAPSED|COLLAPSED|COLLAPSED	PURE|EXS|UNIQ|NON|REP|NONE	-	-	COLLAPSED	-	-	repeat	7
BASENJISCAFF0005	4910	25	26.3149	100	4910	17	30	0.5086	0.02	50.31	49.67	0	BASENJISCAFF0664	BASENJISCAFF0251	72.93	258.39	KEEP	0	0	1777	1922.74	206581	254120	0.51344	98.8739	0	0	FALSE	FALSE	-1	-1	0	0	0	0	0	0	BASPBJ0006_pilon (Unplaced) Diploidocus:PRIMARY|PRIMARY|PRIMARY|PRIMARY|PRIMARY|PRIMARY	GOOD|HAP|REPT|NON|REP|NONE	GOOD|HAP|REPT|TOP|REP|NONE	PURE|DIP|UNIQ|SEC|REP|NONE	PRIMARY	PRIMARY	PRIMARY	keep	7
BASENJISCAFF0006	1501	3	2.5057	100	1501	5	1	0.5406	100	0	0	0	-	-	0	0	JUNK	0	0	1	7.79593	0	1229.35	0.54231	12.4746	0	0	FALSE	FALSE	-1	-1	0	0	0	0	0	0	BASPBJ0007_pilon (Unplaced)	PURE|LOW|UNIQ|NON|PRI|NONE	-	-	HPURGE	-	-	quarantine	1
BASENJISCAFF0007	2228	1	1	100	2228	0	1	0.4523	100	0	0	0	-	-	0	0	JUNK	0	0	1	1.53769	0	34.5177	0.46858	21.9346	0	0	FALSE	FALSE	-1	-1	0	0	0	0	0	0	BASPBJ0012_pilon (Unplaced)	LOWX|LOW|UNIQ|NON|PRI|NONE	-	-	LOWCOV	-	-	junk	1
BASENJISCAFF0008	1821	11	9.3641	90.0055	1639	12	9	0.555	37.4	62.6	0	0	BASENJISCAFF0087	BASENJICHR29.01	54.97	63.48	KEEP	0	0	1	56.2942	71	10279	0.55684	62.6741	0	0	FALSE	FALSE	-1	-1	0	0	0	0	0	0	BASPBJ0013_pilon (Unplaced)	GOOD|HAP|HOMO|NON|PRI|NONE	GOOD|EXS|REPT|TOP|REP|NONE	PURE|DIP|UNIQ|TOP|PRI|COMP	HPURGE	PRIMARY	PRIMARY	quarantine	1
BASENJISCAFF0009	6434	1	1.2681	99.8757	6426	2	0	0.4587	100	0	0	0	-	-	0	0	JUNK	0	0	1	199.721	0	6198.43	0.46705	25.3901	0	0	FALSE	FALSE	-1	-1	0	0	0	0	0	0	BASPBJ0014_pilon (Unplaced)	LOWX|LOW|UNIQ|NON|PRI|NONE	-	-	LOWCOV	-	-	junk	1
BASENJISCAFF0010	537	5	4.1397	98.8827	531	5	1	0.5092	100	0	0	0	-	-	0	0	JUNK	0	0	1	278.411	2	93668.4	0.51583	52.2505	0	0	FALSE	FALSE	-1	-1	0	0	0	0	0	0	BASPBJ0015_pilon (Unplaced)	PURE|LOW|UNIQ|NON|PRI|NONE	-	-	HPURGE	-	-	quarantine	1
BASENJISCAFF0011	23990	183	203.814	100	23990	325	559	0.4999	0.004	2.843	2.163	94.99	-	-	0	0	JUNK	0	0	700	1220.14	285742	309541	0.5105	97.876	0	0	FALSE	FALSE	-1	-1	0	0	0	0	0	0	BASPBJ0016_pilon (Unplaced) Diploidocus:COLLAPSED|COLLAPSED|COLLAPSED|COLLAPSED|COLLAPSED|COLLAPSED	PURE|EXS|UNIQ|NON|REP|NONE	-	-	COLLAPSED	-	-	repeat	7
BASENJISCAFF0012	952	3	3.1366	100	952	5	1	0.5696	100	0	0	0	-	-	0	0	JUNK	0	0	1	26.0497	0	4999.79	0.57668	24.946	0	0	FALSE	FALSE	-1	-1	0	0	0	0	0	0	BASPBJ0017_pilon (Unplaced)	PURE|LOW|UNIQ|NON|PRI|NONE	-	-	HPURGE	-	-	quarantine	1
BASENJISCAFF0013	2282	50	42.9676	93.7336	2139	27	37	0.55	6.617	7.099	86.28	0	-	-	0	0	KEEP	0	1	4	80.1201	1413	15293.4	0.55784	92.0213	0	0	FALSE	FALSE	-1	-1	0	0	0	0	0	0	BASPBJ0019_pilon (Unplaced) Diploidocus:PRIMARY|PRIMARY|PRIMARY|PRIMARY|PRIMARY|PRIMARY	PURE|DIP|UNIQ|SEC|REP|NONE	-	-	PRIMARY	-	-	keep	7
BASENJISCAFF0014	1157	14	13.2532	99.9136	1156	17	6	0.5532	3.025	96.98	0	0	BASENJICHR1.02	BASENJISCAFF0340	73.73	267.76	KEEP	0	0	2	69.5738	434	12714.3	0.57217	65.4288	0	0	FALSE	FALSE	-1	-1	0	0	0	0	0	0	BASPBJ0020_pilon (Unplaced)	PURE|HAP|REPT|NON|ALT|NONE	GOOD|DIP|REPT|TOP|REP|NONE	PURE|DIP|UNIQ|TOP|PRI|NONE	HPURGE	PRIMARY	PRIMARY	quarantine	1
BASENJISCAFF0015	11002	86	79.1204	100	11002	122	70	0.5061	0.173	8.998	23.6	67.23	BASENJISCAFF0471	BASENJISCAFF0572	94.18	1624.94	KEEP	4	0	2261	2423.68	281729	340473	0.51636	99.2165	0	0	FALSE	FALSE	-1	-1	0	0	0	0	0	0	BASPBJ0022_pilon (Unplaced) Diploidocus:PRIMARY|PRIMARY|PRIMARY|PRIMARY|PRIMARY|PRIMARY	GOOD|EXS|REPT|TOP|REP|NONE	GOOD|HAP|REPT|TOP|REP|NONE	GOOD|DIP|REPT|TOP|REP|NONE	PRIMARY	PRIMARY	PRIMARY	keep	7
BASENJISCAFF0016	2349	17	15.5109	99.4466	2336	20	12	0.551	26.48	68.92	4.597	0	BASENJICHR35.02	BASENJICHR1.02	84.25	531.08	KEEP	0	0	1	49.2777	0	8598.23	0.54662	49.3758	0	0	FALSE	FALSE	-1	-1	0	0	0	0	0	0	BASPBJ0024_pilon (Unplaced)	GOOD|HAP|REPT|NON|PRI|NONE	GOOD|EXS|REPT|TOP|REP|NONE	GOOD|DIP|REPT|TOP|REP|NONE	HPURGE	PRIMARY	PRIMARY	quarantine	1
BASENJISCAFF0017	1389	147	139.459	100	1389	84	90	0.5549	0	0	0	100	-	-	0	0	JUNK	0	0	5	82.27	2300	15818.8	0.57307	99.193	0	0	FALSE	FALSE	-1	-1	0	0	0	0	0	0	BASPBJ0025_pilon (Unplaced) Diploidocus:COLLAPSED|COLLAPSED|COLLAPSED|COLLAPSED|COLLAPSED|COLLAPSED	PURE|EXS|UNIQ|NON|REP|NONE	-	-	COLLAPSED	-	-	repeat	7
BASENJISCAFF0018	5083	1	1.4531	99.9803	5082	1	2	0.5825	100	0	0	0	-	-	0	0	JUNK	0	0	1	267.401	0	5198.43	0.58489	21.0797	0	0	FALSE	FALSE	-1	-1	0	0	0	0	0	0	BASPBJ0026_pilon (Unplaced)	LOWX|LOW|UNIQ|NON|PRI|NONE	-	-	LOWCOV	-	-	junk	1
BASENJISCAFF0019	806	25	23.5744	100	806	16	16	0.5347	0	80.03	19.98	0	BASENJICHR29.01	BASENJISCAFF0658	49.63	102.98	KEEP	0	0	2	99.1385	1534	20385.6	0.54963	100	0	0	FALSE	FALSE	-1	-1	0	0	0	0	0	0	BASPBJ0027_pilon (Unplaced) Diploidocus:PRIMARY|PRIMARY|PRIMARY|PRIMARY|PRIMARY	PURE|HAP|PART|NON|ALT|NONE	PURE|DIP|UNIQ|TOP|PRI|COMP	PURE|DIP|UNIQ|SEC|REP|NONE	HPURGE	PRIMARY	PRIMARY	quarantine	6
BASENJISCAFF0020	6185	16	15.3263	100	6185	13	20	0.5056	0.162	99.84	0	0	BASENJISCAFF1032	BASENJISCAFF0370	92.72	810.59	KEEP	0	1	1804	2677.66	191149	247026	0.5135	96.2656	0	0	FALSE	FALSE	-1	-1	0	0	0	0	0	0	BASPBJ0028_pilon (Unplaced)	PURE|HAP|REPT|SEC|REP|NONE	GOOD|EXS|REPT|TOP|REP|NONE	PURE|DIP|UNIQ|TOP|REP|NONE	HPURGE	PRIMARY	PRIMARY	quarantine	1
BASENJISCAFF0021	336	0	0	0	0	0	0	0	100	0	0	0	-	-	0	0	KEEP	0	0	1	514.377	2	117991	0.5119	50.9677	0	0	FALSE	FALSE	-1	-1	0	0	0	0	0	0	BASPBJ0029_pilon (Unplaced)	LOWX|LOW|UNIQ|NON|PRI|NONE	-	-	LOWCOV	-	-	junk	1
BASENJISCAFF0022	3063	5	5.3872	99.9674	3062	5	6	0.5093	84.98	15.02	0	0	-	-	0	0	JUNK	0	0	907	2870.69	93284	237014	0.51649	81.6925	0	0	FALSE	FALSE	-1	-1	0	0	0	0	0	0	BASPBJ0030_pilon (Unplaced)	PURE|LOW|UNIQ|NON|REP|NONE	-	-	HPURGE	-	-	quarantine	1
BASENJISCAFF0023	3227	56	49.0927	100	3227	86	2	0.5094	0	11.44	81.31	7.251	-	-	0	0	KEEP	0	0	1817	1920.64	208272	257671	0.51503	89.6907	0	0	FALSE	FALSE	-1	-1	0	0	0	0	0	0	BASPBJ0031_pilon (Unplaced) Diploidocus:PRIMARY|PRIMARY|PRIMARY|PRIMARY|PRIMARY|PRIMARY	PURE|DIP|UNIQ|NON|REP|NONE	-	-	PRIMARY	-	-	keep	7
BASENJISCAFF0024	1352	5	5.0643	100	1352	6	2	0.5074	78.85	21.15	0	0	BASENJISCAFF0277	BASENJISCAFF0675	78.77	319.9	KEEP	0	1	1	247.942	0	50667.4	0.52441	36.8024	0	0	FALSE	FALSE	-1	-1	0	0	0	0	0	0	BASPBJ0034_pilon (Unplaced)	GOOD|LOW|REPT|SEC|PRI|NONE	GOOD|EXS|REPT|TOP|REP|NONE	PURE|HAP|PART|SEC|PRI|NONE	HPURGE	PRIMARY	HPURGE	quarantine	1
BASENJISCAFF0025	704	5	4.0483	98.8636	696	4	2	0.5377	100	0	0	0	-	-	0	0	JUNK	0	0	1	39.5767	0	7210.66	0.54545	42.6254	0	0	FALSE	FALSE	-1	-1	0	0	0	0	0	0	BASPBJ0036_pilon (Unplaced)	PURE|LOW|UNIQ|NON|PRI|NONE	-	-	HPURGE	-	-	quarantine	1
BASENJISCAFF0026	1101	3	3.1453	99.8183	1099	0	4	0.5118	100	0	0	0	-	-	0	0	JUNK	0	0	16	1307.22	1473	158835	0.52316	67.2558	0	0	FALSE	FALSE	-1	-1	0	0	0	0	0	0	BASPBJ0037_pilon (Unplaced)	PURE|LOW|UNIQ|NON|REP|NONE	-	-	HPURGE	-	-	quarantine	1
BASENJISCAFF0027	1914	9	8.3077	100	1914	7	10	0.5559	42.27	57.73	0	0	BASENJISCAFF0779	BASENJISCAFF0659	40.96	40.96	KEEP	1	0	1	50.8882	0	8873.7	0.56479	44.0678	0	0	FALSE	FALSE	-1	-1	0	0	0	0	0	0	BASPBJ0038_pilon (Unplaced)	GOOD|HAP|PART|TOP|PRI|NONE	PURE|DIP|UNIQ|TOP|REP|NONE	GOOD|DIP|HOMO|SEC|REP|NONE	HPURGE	PRIMARY	PRIMARY	quarantine	1
BASENJISCAFF0028	2251	46	42.9609	100	2251	71	10	0.5071	0.533	20.48	76.1	2.888	BASENJISCAFF0284	BASENJISCAFF1053	83.65	420.12	KEEP	0	1	531	953.996	279608	282396	0.51044	81.8427	0	0	FALSE	FALSE	-1	-1	0	0	0	0	0	0	BASPBJ0039_pilon (Unplaced) Diploidocus:PRIMARY|PRIMARY|PRIMARY|PRIMARY|PRIMARY|PRIMARY	GOOD|DIP|REPT|SEC|REP|NONE	GOOD|EXS|HOMO|TOP|REP|NONE	GOOD|EXS|REPT|TOP|REP|NONE	PRIMARY	PRIMARY	PRIMARY	keep	7
BASENJISCAFF0029	1040	13	12.676	100	1040	16	5	0.5079	1.154	98.85	0	0	BASENJISCAFF0135	BASENJISCAFF0237	78.27	122.31	KEEP	0	0	22	1014.23	4926	135468	0.51731	66.9625	0	0	FALSE	FALSE	-1	-1	0	0	0	0	0	0	BASPBJ0040_pilon (Unplaced)	PURE|HAP|HOMO|NON|REP|NONE	WEAK|LOW|REPT|TOP|REP|NONE	GOOD|DIP|REPT|SEC|REP|NONE	HPURGE	KEEP	PRIMARY	quarantine	1
BASENJISCAFF0030	889	20	18.279	100	889	12	13	0.5303	5.174	94.83	0	0	-	-	0	0	KEEP	0	0	4	7846.67	2308	245828	0.54556	84.7045	0	0	FALSE	FALSE	-1	-1	0	0	0	0	0	0	BASPBJ0042_pilon (Unplaced) Diploidocus:PRIMARY	PURE|HAP|UNIQ|NON|REP|NONE	-	-	HPURGE	-	-	quarantine	2
BASENJISCAFF0031	3847	283	263.053	99.818	3840	167	192	0.552	0.8577	0.3903	0.02595	98.73	-	-	0	0	JUNK	0	0	2	108.639	909	19554.4	0.56694	68.3591	0	0	FALSE	FALSE	-1	-1	0	0	0	0	0	0	BASPBJ0045_pilon (Unplaced) Diploidocus:COLLAPSED|COLLAPSED|COLLAPSED|COLLAPSED|COLLAPSED|COLLAPSED	PURE|EXS|UNIQ|NON|ALT|NONE	-	-	COLLAPSED	-	-	repeat	7
BASENJISCAFF0032	6184	600	550.979	100	6184	619	469	0.5063	0	0	0.081	99.92	-	-	0	0	JUNK	0	0	706	1026.35	333569	335240	0.51277	96.8171	0	0	FALSE	FALSE	-1	-1	0	0	0	0	0	0	BASPBJ0046_pilon (Unplaced) Diploidocus:COLLAPSED|COLLAPSED|COLLAPSED|COLLAPSED|COLLAPSED|COLLAPSED	PURE|EXS|UNIQ|NON|REP|NONE	-	-	COLLAPSED	-	-	repeat	7
BASENJISCAFF0033	824	0	0	0	0	0	0	0	100	0	0	0	-	-	0	0	KEEP	0	0	1	35.213	0	6842.24	0.54854	39.599	0	0	FALSE	FALSE	-1	-1	0	0	0	0	0	0	BASPBJ0048_pilon (Unplaced)	LOWX|LOW|UNIQ|NON|PRI|NONE	-	-	LOWCOV	-	-	junk	1
BASENJISCAFF0034	3028	7	24.324	99.3725	3009	41	31	0.5535	50.2	0.4959	49.31	0	BASENJICHR35.02	BASENJISCAFF0961	70.24	95.41	KEEP	0	0	1	89.4837	338	15877.8	0.57563	65.3231	0	0	FALSE	FALSE	-1	-1	0	0	0	0	0	0	BASPBJ0049_pilon (Unplaced) Diploidocus:PRIMARY|PRIMARY|PRIMARY|PRIMARY|PRIMARY|PRIMARY	GOOD|LOW|HOMO|NON|PRI|NONE	GOOD|EXS|REPT|TOP|REP|NONE	GOOD|EXS|REPT|SEC|PRI|NONE	PRIMARY	PRIMARY	PRIMARY	keep	7
BASENJISCAFF0035	4711	1	0.9994	99.9363	4708	0	1	0.3591	100	0	0	0	-	-	0	0	JUNK	0	0	1	220.112	0	4076.95	0.35598	5.16542	0	0	FALSE	FALSE	-1	-1	0	0	0	0	0	0	BASPBJ0050_pilon (Unplaced)	LOWX|LOW|UNIQ|NON|PRI|NONE	-	-	LOWCOV	-	-	junk	1
BASENJISCAFF0036	5030	46	39.1082	100	5030	83	5	0.5089	1.213	26.12	72.66	0	BASENJISCAFF0299	BASENJISCAFF0664	96.16	1741.49	REPEAT	0	0	1701	1770.13	201469	244473	0.51412	82.6139	0	0	FALSE	FALSE	-1	-1	0	0	0	0	0	0	BASPBJ0052_pilon (Unplaced) Diploidocus:PRIMARY|PRIMARY|PRIMARY|PRIMARY|PRIMARY|PRIMARY	GOOD|DIP|REPT|NON|REP|NONE	GOOD|EXS|REPT|TOP|REP|NONE	GOOD|HAP|REPT|TOP|REP|NONE	PRIMARY	PRIMARY	PRIMARY	keep	7
BASENJISCAFF0037	700	1	1	100	700	1	0	0.5758	100	0	0	0	-	-	0	0	JUNK	0	0	1	30.5475	0	4956.27	0.58429	37.9822	0	0	FALSE	FALSE	-1	-1	0	0	0	0	0	0	BASPBJ0053_pilon (Unplaced)	LOWX|LOW|UNIQ|NON|PRI|NONE	-	-	LOWCOV	-	-	junk	1
BASENJISCAFF0038	3868	36	33.1962	99.8707	3863	77	37	0.5466	0.1552	31.85	67.99	0	BASENJICHR1.02	BASENJICHR35.02	59.72	94.75	KEEP	0	0	1	45.8209	0	8020.03	0.55636	43.1806	0	0	FALSE	FALSE	-1	-1	0	0	0	0	0	0	BASPBJ0054_pilon (Unplaced) Diploidocus:PRIMARY|PRIMARY|PRIMARY|PRIMARY|PRIMARY|PRIMARY	GOOD|DIP|HOMO|NON|PRI|NONE	WEAK|DIP|REPT|TOP|REP|NONE	GOOD|EXS|REPT|TOP|REP|NONE	PRIMARY	PRIMARY	PRIMARY	keep	7
BASENJISCAFF0039	1018	4	3.3507	100	1018	3	3	0.5052	100	0	0	0	-	-	0	0	JUNK	0	0	829	995.588	333805	277899	0.52161	87.9032	0	0	FALSE	FALSE	-1	-1	0	0	0	0	0	0	BASPBJ0055_pilon (Unplaced)	PURE|LOW|UNIQ|NON|REP|NONE	-	-	HPURGE	-	-	quarantine	1
BASENJISCAFF0040	504	1	1	100	504	1	0	0.7724	100	0	0	0	-	-	0	0	JUNK	0	0	1	1.28033	0	4.16736	0.7619	6.27615	0	0	FALSE	FALSE	-1	-1	0	0	0	0	0	0	BASPBJ0056_pilon (Unplaced)	LOWX|LOW|UNIQ|NON|PRI|NONE	-	-	LOWCOV	-	-	junk	1
BASENJISCAFF0041	2189	1	1.228	87.0717	1906	3	0	0.5351	100	0	0	0	-	-	0	0	JUNK	0	0	1	18.4166	0	2885.45	0.55459	24.8266	0	0	FALSE	FALSE	-1	-1	0	0	0	0	0	0	BASPBJ0057_pilon (Unplaced)	LOWX|LOW|UNIQ|NON|PRI|NONE	-	-	LOWCOV	-	-	junk	1
BASENJISCAFF0042	6544	1248	1208.2	100	6544	1012	644	0.5045	0	0	0	100	-	-	0	0	JUNK	0	0	485	896.133	264109	265241	0.50397	98.4965	0	0	FALSE	FALSE	-1	-1	0	0	0	0	0	0	BASPBJ0058_pilon (Unplaced) Diploidocus:COLLAPSED|COLLAPSED|COLLAPSED|COLLAPSED|COLLAPSED|COLLAPSED	PURE|EXS|UNIQ|NON|REP|NONE	-	-	COLLAPSED	-	-	repeat	7
BASENJISCAFF0043	42864	137	221.839	100	42864	1157	27	0.5067	3.094	14.56	13.69	68.66	BASENJISCAFF0473	BASENJISCAFF0325	99.72	14427.9	REPEAT	0	0	471	1128.66	209973	248031	0.52342	82.6042	0	0	FALSE	FALSE	-1	-1	0	0	0	0	0	0	BASPBJ0059_pilon (Unplaced) Diploidocus:COLLAPSED|COLLAPSED|COLLAPSED|COLLAPSED|COLLAPSED|COLLAPSED	GOOD|EXS|REPT|NON|REP|NONE	GOOD|EXS|REPT|TOP|REP|NONE	GOOD|EXS|REPT|TOP|REP|NONE	COLLAPSED	PRIMARY	PRIMARY	repeat	7
BASENJISCAFF0044	666	6	5.9745	100	666	6	1	0.5051	100	0	0	0	-	-	0	0	JUNK	0	0	1	293.488	0	43163.7	0.52703	41.4062	0	0	FALSE	FALSE	-1	-1	0	0	0	0	0	0	BASPBJ0061_pilon (Unplaced)	PURE|LOW|UNIQ|NON|PRI|NONE	-	-	HPURGE	-	-	quarantine	1
BASENJISCAFF0045	606	31	28.3152	100	606	21	13	0.3107	0.165	20.3	79.54	0	BASENJICHR35.02	BASENJICHR38.01	75.91	2364.03	KEEP	0	0	1	2.93793	0	2111.53	0.30693	16.3793	0	0	FALSE	FALSE	-1	-1	0	0	0	0	0	0	BASPBJ0064_pilon (Unplaced) Diploidocus:PRIMARY|PRIMARY|PRIMARY|PRIMARY|PRIMARY|PRIMARY	GOOD|DIP|REPT|NON|PRI|NONE	GOOD|EXS|REPT|TOP|REP|NONE	PURE|DIP|UNIQ|SEC|PRI|COMP	PRIMARY	PRIMARY	PRIMARY	keep	7
BASENJISCAFF0046	3063	21	19.3908	100	3063	4	34	0.5033	0.098	95.66	4.244	0	BASENJISCAFF0299	BASENJISCAFF0070	89.68	471.04	KEEP	0	0	1748	1802.65	182297	228661	0.51322	86.5657	0	0	FALSE	FALSE	-1	-1	0	0	0	0	0	0	BASPBJ0066_pilon (Unplaced)	PURE|HAP|REPT|NON|REP|NONE	GOOD|EXS|REPT|TOP|REP|NONE	GOOD|DIP|REPT|TOP|REP|NONE	HPURGE	COLLAPSED	PRIMARY	quarantine	1
BASENJISCAFF0047	724	16	14.2265	100	724	0	18	0.5089	8.702	91.3	0	0	BASENJISCAFF0365	BASENJISCAFF0242	38.4	46.96	KEEP	0	0	9	633.798	1233	169276	0.52348	74.3553	0	0	FALSE	FALSE	-1	-1	0	0	0	0	0	0	BASPBJ0067_pilon (Unplaced)	PURE|HAP|PART|NON|REP|NONE	GOOD|DIP|HOMO|TOP|REP|NONE	GOOD|HAP|HOMO|SEC|REP|NONE	HPURGE	PRIMARY	HPURGE	quarantine	1
BASENJISCAFF0048	840	24	23.7798	100	840	2	29	0.5032	0.714	57.02	42.26	0	BASENJISCAFF0371	BASENJISCAFF0915	75.24	85.71	KEEP	0	0	11	499.367	1843	139418	0.50952	82.9238	0	0	FALSE	FALSE	-1	-1	0	0	0	0	0	0	BASPBJ0068_pilon (Unplaced) Diploidocus:PRIMARY|PRIMARY|PRIMARY|PRIMARY|PRIMARY|PRIMARY	GOOD|HAP|HOMO|NON|REP|NONE	PURE|DIP|UNIQ|TOP|REP|NONE	GOOD|DIP|REPT|SEC|REP|NONE	PRIMARY	PRIMARY	PRIMARY	keep	7
BASENJISCAFF0049	41931	5	8.2918	73.1511	30673	73	23	0.5075	56.99	37.34	5.668	0	BASENJISCAFF0748	BASENJISCAFF0277	99.93	3159.54	REPEAT	0	0	904	1349.27	345201	348044	0.51745	95.1509	0	0	FALSE	FALSE	-1	-1	0	0	0	0	0	0	BASPBJ0070_pilon (Unplaced)	GOOD|LOW|REPT|NON|REP|NONE	WEAK|LOW|REPT|TOP|REP|NONE	GOOD|EXS|REPT|TOP|REP|NONE	HPURGE	PRIMARY	PRIMARY	quarantine	1
BASENJISCAFF0050	1634	25	26.7356	100	1634	28	25	0.5494	0.428	54.77	44.8	0	BASENJISCAFF0997	BASENJICHR35.02	99.57	439.41	REPEAT	0	0	3	77.8483	1472	16308.5	0.56548	99.3159	0	0	FALSE	FALSE	-1	-1	0	0	0	0	0	0	BASPBJ0071_pilon (Unplaced) Diploidocus:PRIMARY|PRIMARY|PRIMARY|PRIMARY|PRIMARY|PRIMARY	GOOD|HAP|REPT|NON|REP|NONE	GOOD|EXS|REPT|TOP|PRI|NONE	GOOD|EXS|REPT|TOP|REP|NONE	PRIMARY	PRIMARY	PRIMARY	keep	7
BASENJISCAFF0051	992	1	1.001	88.1048	874	1	2	0.5381	100	0	0	0	-	-	0	0	JUNK	0	0	1	8.41925	0	1145.99	0.57157	15.4244	0	0	FALSE	FALSE	-1	-1	0	0	0	0	0	0	BASPBJ0074_pilon (Unplaced)	LOWX|LOW|UNIQ|NON|PRI|NONE	-	-	LOWCOV	-	-	junk	1
BASENJISCAFF0052	2099	1	1.1696	51.8342	1088	3	3	0.5443	100	0	0	0	-	-	0	0	JUNK	0	0	1	7.3232	0	912.976	0.55598	7.13941	0	0	FALSE	FALSE	-1	-1	0	0	0	0	0	0	BASPBJ0075_pilon (Unplaced)	LOWX|LOW|UNIQ|NON|PRI|NONE	-	-	LOWCOV	-	-	junk	1
BASENJISCAFF0053	5557	52	60.8424	99.6221	5536	92	80	0.5464	1.116	38.73	16.61	43.55	BASENJICHR35.02	BASENJISCAFF0298	90.71	301.48	KEEP	0	1	2	80.3596	402	14688.7	0.55192	57.7111	0	0	FALSE	FALSE	-1	-1	0	0	0	0	0	0	BASPBJ0077_pilon (Unplaced) Diploidocus:PRIMARY|KEEP|KEEP|KEEP|KEEP|KEEP	WEAK|EXS|REPT|SEC|ALT|NONE	GOOD|EXS|REPT|TOP|REP|NONE	WEAK|DIP|REPT|SEC|PRI|NONE	KEEP	PRIMARY	PRIMARY	keep	7
BASENJISCAFF0054	20845	17	16.5662	99.976	20840	110	19	0.508	18.24	70.53	11.23	0	BASENJISCAFF0748	BASENJISCAFF0277	98.08	5086.62	REPEAT	0	0	904	1353.6	352791	357055	0.51408	97.2045	0	0	FALSE	FALSE	-1	-1	0	0	0	0	0	0	BASPBJ0078_pilon (Unplaced)	GOOD|HAP|REPT|NON|REP|NONE	WEAK|LOW|REPT|TOP|REP|NONE	GOOD|EXS|REPT|TOP|REP|NONE	HPURGE	PRIMARY	PRIMARY	quarantine	1
BASENJISCAFF0055	3161	33	30.1107	100	3161	10	42	0.5105	0.475	27.11	72.41	0	BASENJISCAFF0015	BASENJISCAFF0471	96.8	1729.71	REPEAT	0	0	1739	1763.26	208825	248413	0.51724	87.815	0	0	FALSE	FALSE	-1	-1	0	0	0	0	0	0	BASPBJ0079_pilon (Unplaced) Diploidocus:PRIMARY|PRIMARY|PRIMARY|PRIMARY|PRIMARY|PRIMARY	GOOD|DIP|REPT|NON|REP|NONE	GOOD|EXS|REPT|TOP|REP|NONE	GOOD|HAP|REPT|TOP|REP|NONE	PRIMARY	PRIMARY	PRIMARY	keep	7
BASENJISCAFF0056	1043	5	5.0077	100	1043	8	0	0.38	100	0	0	0	-	-	0	0	JUNK	0	0	1	1367.24	0	55596.4	0.3931	48.9676	0	0	FALSE	FALSE	-1	-1	0	0	0	0	0	0	BASPBJ0080_pilon (Unplaced)	PURE|LOW|UNIQ|NON|PRI|NONE	-	-	HPURGE	-	-	quarantine	1
BASENJISCAFF0057	1165	17	16.127	100	1165	23	1	0.5092	7.468	92.53	0	0	BASENJISCAFF0352	BASENJISCAFF0418	30.56	38.2	KEEP	0	1	582	946.604	276359	250788	0.5176	84.5478	0	0	FALSE	FALSE	-1	-1	0	0	0	0	0	0	BASPBJ0082_pilon (Unplaced)	PURE|HAP|PART|SEC|REP|NONE	PURE|HAP|PART|TOP|REP|NONE	GOOD|EXS|REPT|TOP|REP|NONE	HPURGE	HPURGE	PRIMARY	quarantine	1
BASENJISCAFF0058	1213	15	13.7741	99.7527	1210	29	4	0.4963	6.43	93.57	0	0	BASENJICHR35.02	BASENJICHR11.01	63.56	552.02	KEEP	0	0	1	24.3968	0	1846.5	0.5235	17.6917	0	0	FALSE	FALSE	-1	-1	0	0	0	0	0	0	BASPBJ0083_pilon (Unplaced)	PURE|HAP|REPT|NON|PRI|NONE	GOOD|EXS|REPT|TOP|REP|NONE	PURE|DIP|UNIQ|TOP|PRI|COMP	HPURGE	PRIMARY	PRIMARY	quarantine	1
BASENJISCAFF0059	1565	97	96.3227	100	1565	63	69	0.5416	0	0.192	3.323	96.49	-	-	0	0	JUNK	0	0	7	922.726	3766	42481.5	0.55527	100	0	0	FALSE	FALSE	-1	-1	0	0	0	0	0	0	BASPBJ0084_pilon (Unplaced) Diploidocus:COLLAPSED|COLLAPSED|COLLAPSED|COLLAPSED|COLLAPSED|COLLAPSED	PURE|EXS|UNIQ|NON|REP|NONE	-	-	COLLAPSED	-	-	repeat	7
BASENJISCAFF0060	5742	9	16.1552	99.8258	5732	44	25	0.5465	41.66	37.44	20.9	0	BASENJICHR35.02	BASENJISCAFF0326	51.72	87.74	KEEP	1	0	1	12.6561	0	2251.77	0.52891	19.1393	0	0	FALSE	FALSE	-1	-1	0	0	0	0	0	0	BASPBJ0085_pilon (Unplaced) Diploidocus:PRIMARY|PRIMARY|PRIMARY|PRIMARY|PRIMARY|PRIMARY	WEAK|LOW|HOMO|TOP|PRI|NONE	GOOD|EXS|REPT|TOP|REP|NONE	GOOD|DIP|PART|SEC|PRI|NONE	PRIMARY	PRIMARY	PRIMARY	keep	7
BASENJISCAFF0061	3761	22	18.8171	100	3761	38	26	0.5567	45.52	9.386	45.09	0	BASENJISCAFF0422	BASENJICHR35.02	50.09	128.18	KEEP	1	0	1	56.7531	0	10608.3	0.55783	48.9692	0	0	FALSE	FALSE	-1	-1	0	0	0	0	0	0	BASPBJ0086_pilon (Unplaced) Diploidocus:PRIMARY|PRIMARY|PRIMARY|PRIMARY|PRIMARY|PRIMARY	WEAK|LOW|HOMO|TOP|PRI|NONE	GOOD|DIP|HOMO|TOP|REP|NONE	GOOD|EXS|REPT|TOP|REP|NONE	PRIMARY	PRIMARY	PRIMARY	keep	7
BASENJISCAFF0062	805	3	2.7478	56.7702	457	8	0	0.5353	93.66	6.336	0	0	-	-	0	0	JUNK	0	0	1	12.4275	0	1812.71	0.55901	13.4788	0	0	FALSE	FALSE	-1	-1	0	0	0	0	0	0	BASPBJ0087_pilon (Unplaced)	PURE|LOW|UNIQ|NON|PRI|NONE	-	-	HPURGE	-	-	quarantine	1
BASENJISCAFF0063	839	6	5.559	100	839	1	8	0.5508	99.52	0.477	0	0	-	-	0	0	JUNK	0	0	1	31.2448	0	3951.77	0.55304	45.1414	0	0	FALSE	FALSE	-1	-1	0	0	0	0	0	0	BASPBJ0088_pilon (Unplaced)	PURE|LOW|UNIQ|NON|PRI|NONE	-	-	HPURGE	-	-	quarantine	1
BASENJISCAFF0064	947	3	3.6061	100	947	1	5	0.5281	100	0	0	0	-	-	0	0	JUNK	0	0	1	358.84	1	45877.4	0.53221	51.3572	0	0	FALSE	FALSE	-1	-1	0	0	0	0	0	0	BASPBJ0090_pilon (Unplaced)	PURE|LOW|UNIQ|NON|PRI|NONE	-	-	HPURGE	-	-	quarantine	1
BASENJISCAFF0065	323	2	1.9319	98.7616	319	2	0	0.5416	100	0	0	0	-	-	0	0	JUNK	0	0	1	7.98316	0	1526.85	0.54489	9.76431	0	0	FALSE	FALSE	-1	-1	0	0	0	0	0	0	BASPBJ0093_pilon (Unplaced)	LOWX|LOW|UNIQ|NON|PRI|NONE	-	-	LOWCOV	-	-	junk	1
BASENJISCAFF0066	1834	16	15.4602	100	1834	15	14	0.5497	1.309	98.69	0	0	BASENJISCAFF0198	BASENJICHR1.02	75.68	138.17	KEEP	0	0	7	156.136	2965	27196.8	0.56816	98.6726	0	0	FALSE	FALSE	-1	-1	0	0	0	0	0	0	BASPBJ0095_pilon (Unplaced)	PURE|HAP|HOMO|NON|REP|NONE	GOOD|EXS|REPT|TOP|REP|NONE	GOOD|DIP|REPT|TOP|REP|NONE	HPURGE	PRIMARY	PRIMARY	quarantine	1
BASENJISCAFF0067	1491	11	8.4199	100	1491	8	10	0.5482	40.11	59.89	0	0	BASENJICHR35.02	BASENJICHR1.02	78.27	252.11	KEEP	0	0	1	70.0375	228	12372.7	0.57009	57.5427	0	0	FALSE	FALSE	-1	-1	0	0	0	0	0	0	BASPBJ0096_pilon (Unplaced)	GOOD|HAP|REPT|NON|PRI|NONE	GOOD|EXS|REPT|TOP|REP|NONE	GOOD|DIP|REPT|TOP|REP|NONE	HPURGE	PRIMARY	PRIMARY	quarantine	1
BASENJISCAFF0068	7297	260	246.532	99.9726	7295	500	476	0.4255	0.2054	0.02699	26.16	73.61	BASENJICHR19.01	BASENJICHR20.01	71.54	390.56	KEEP	0	0	1	1403.57	743	48600.4	0.40866	74.3364	0	0	FALSE	FALSE	-1	-1	0	0	0	0	0	0	BASPBJ0098_pilon (Unplaced) Diploidocus:PRIMARY|PRIMARY|PRIMARY|PRIMARY|PRIMARY|PRIMARY	GOOD|EXS|REPT|NON|PRI|NONE	PURE|DIP|UNIQ|TOP|PRI|COMP	PURE|DIP|UNIQ|TOP|PRI|COMP|+VEC	PRIMARY	PRIMARY	PRIMARY	keep	7
BASENJISCAFF0069	294	1	1	100	294	0	1	0.5323	100	0	0	0	-	-	0	0	JUNK	0	0	1	1.10821	0	45.5858	0.55442	21.6418	0	0	FALSE	FALSE	-1	-1	0	0	0	0	0	0	BASPBJ0099_pilon (Unplaced)	LOWX|LOW|UNIQ|NON|PRI|NONE	-	-	LOWCOV	-	-	junk	1
BASENJISCAFF0070	67252	35	88.5382	100	67252	277	791	0.5088	0	19.57	57.96	22.48	BASENJISCAFF0473	BASENJISCAFF0299	92.27	1677.86	KEEP	0	5	1766	1842.5	205153	251456	0.51381	92.0834	0	0	FALSE	FALSE	-1	-1	0	0	0	0	0	0	BASPBJ0100_pilon (Unplaced) Diploidocus:PRIMARY|PRIMARY|PRIMARY|PRIMARY|PRIMARY|PRIMARY	GOOD|DIP|REPT|SEC|REP|NONE	GOOD|EXS|REPT|TOP|REP|NONE	GOOD|EXS|REPT|TOP|REP|NONE	PRIMARY	PRIMARY	PRIMARY	keep	7
BASENJISCAFF0071	2303	27	26.7277	100	2303	55	1	0.5117	0.564	45.46	53.97	0	BASENJISCAFF0473	BASENJISCAFF0269	87.97	1642.47	KEEP	0	0	1583	1664.72	178251	220987	0.51889	84.7606	0	0	FALSE	FALSE	-1	-1	0	0	0	0	0	0	BASPBJ0101_pilon (Unplaced) Diploidocus:PRIMARY|PRIMARY|PRIMARY|PRIMARY|PRIMARY|PRIMARY	GOOD|DIP|REPT|NON|REP|NONE	GOOD|EXS|REPT|TOP|REP|NONE	WEAK|EXS|REPT|TOP|REP|NONE	PRIMARY	PRIMARY	PRIMARY	keep	7
BASENJISCAFF0072	1276	1	1	100	1276	0	1	0.5804	100	0	0	0	-	-	0	0	JUNK	0	0	1	1.1488	0	3.4704	0.59639	16.96	0	0	FALSE	FALSE	-1	-1	0	0	0	0	0	0	BASPBJ0102_pilon (Unplaced)	LOWX|LOW|UNIQ|NON|PRI|NONE	-	-	LOWCOV	-	-	junk	1
BASENJISCAFF0073	577	3	3.4801	98.2669	567	6	0	0.3722	100	0	0	0	-	-	0	0	JUNK	0	0	20	1750.34	388	64175.4	0.37955	67.5136	0	0	FALSE	FALSE	-1	-1	0	0	0	0	0	0	BASPBJ0103_pilon (Unplaced)	PURE|LOW|UNIQ|NON|REP|NONE	-	-	HPURGE	-	-	quarantine	1
BASENJISCAFF0074	833	50	46.0108	100	833	31	38	0.5406	0	14.65	85.35	0	-	-	0	0	KEEP	0	0	4	42.0533	2348	9322.06	0.54502	91.4498	0	0	FALSE	FALSE	-1	-1	0	0	0	0	0	0	BASPBJ0104_pilon (Unplaced) Diploidocus:PRIMARY|PRIMARY|PRIMARY|PRIMARY|PRIMARY|PRIMARY	PURE|DIP|UNIQ|NON|REP|NONE	-	-	PRIMARY	-	-	keep	7
BASENJISCAFF0075	386	9	8.8731	100	386	4	6	0.3995	3.627	96.37	0	0	BASENJICHR34.01	BASENJICHR24.01	47.15	216.32	KEEP	0	0	1	7.06667	0	1517.07	0.39378	46.9444	0	0	FALSE	FALSE	-1	-1	0	0	0	0	0	0	BASPBJ0105_pilon (Unplaced)	PURE|HAP|PART|NON|PRI|NONE	PURE|DIP|UNIQ|TOP|PRI|COMP	PURE|DIP|UNIQ|TOP|PRI|COMP|+VEC	LOWQUAL	PRIMARY	PRIMARY	quarantine	1
BASENJISCAFF0076	88673	45	46.0071	100	88673	224	250	0.5078	0.002	7.569	82.08	10.35	-	-	0	0	KEEP	1	1	1739	1910.72	203313	257445	0.51178	99.5296	0	0	FALSE	FALSE	-1	-1	0	0	0	0	0	0	BASPBJ0106_pilon (Unplaced) Diploidocus:PRIMARY|PRIMARY|PRIMARY|PRIMARY|PRIMARY|PRIMARY	PURE|DIP|UNIQ|TOP|REP|NONE	-	-	PRIMARY	-	-	keep	7
BASENJISCAFF0077	979	3	2.5771	100	979	2	1	0.5493	100	0	0	0	-	-	0	0	JUNK	0	0	1	10.5362	0	1968.59	0.53524	21.7209	0	0	FALSE	FALSE	-1	-1	0	0	0	0	0	0	BASPBJ0107_pilon (Unplaced)	PURE|LOW|UNIQ|NON|PRI|NONE	-	-	HPURGE	-	-	quarantine	1
BASENJISCAFF0078	1387	8	7.0014	100	1387	11	0	0.4099	42.97	57.03	0	0	BASENJICHR18.06	BASENJICHR33.01	70.66	76.71	KEEP	0	0	2	1680.54	26	65294.8	0.40375	54.2248	0	0	FALSE	FALSE	-1	-1	0	0	0	0	0	0	BASPBJ0108_pilon (Unplaced)	GOOD|HAP|HOMO|NON|ALT|NONE	WEAK|DIP|HOMO|TOP|ALT|NONE	PURE|DIP|UNIQ|SEC|PRI|COMP|+VEC	HPURGE	PRIMARY	PRIMARY	quarantine	1
BASENJISCAFF0079	789	4	4.0963	100	789	0	5	0.5073	100	0	0	0	-	-	0	0	JUNK	0	0	828	1031.07	329832	285750	0.51331	82.5688	0	0	FALSE	FALSE	-1	-1	0	0	0	0	0	0	BASPBJ0109_pilon (Unplaced)	PURE|LOW|UNIQ|NON|REP|NONE	-	-	HPURGE	-	-	quarantine	1
BASENJISCAFF0080	2123	2	1.7084	92.0867	1955	0	2	0.2899	100	0	0	0	-	-	0	0	JUNK	0	0	1	2.87124	0	200.554	0.26378	14.5446	0	0	FALSE	FALSE	-1	-1	0	0	0	0	0	0	BASPBJ0110_pilon (Unplaced)	LOWX|LOW|UNIQ|NON|PRI|NONE	-	-	LOWCOV	-	-	junk	1
BASENJISCAFF0081	4806	60	62.8346	100	4806	157	6	0.3856	37.93	1.935	13.28	46.86	-	-	0	0	JUNK	0	0	77	2181.77	1036	86295.1	0.37203	73.5774	0	0	FALSE	FALSE	-1	-1	0	0	0	0	0	0	BASPBJ0111_pilon (Unplaced)	WEAK|EXS|UNIQ|NON|REP|NONE	-	-	JUNK	-	-	junk	1
BASENJISCAFF0082	3075	105	104.547	100	3075	88	102	0.5511	0	0	4.52	95.48	-	-	0	0	JUNK	0	0	7	111.694	2819	18525	0.57106	99.5736	0	0	FALSE	FALSE	-1	-1	0	0	0	0	0	0	BASPBJ0112_pilon (Unplaced) Diploidocus:COLLAPSED|COLLAPSED|COLLAPSED|COLLAPSED|COLLAPSED|COLLAPSED	PURE|EXS|UNIQ|NON|REP|NONE	-	-	COLLAPSED	-	-	repeat	7
BASENJISCAFF0083	566	2	1.53	100	566	0	2	0.4144	100	0	0	0	-	-	0	0	JUNK	0	0	3369	3868.2	132976	140918	0.42756	83.8889	0	0	FALSE	FALSE	-1	-1	0	0	0	0	0	0	BASPBJ0113_pilon (Unplaced)	LOWX|LOW|UNIQ|NON|REP|NONE	-	-	LOWCOV	-	-	junk	1
BASENJISCAFF0084	1506	1	1	100	1506	1	0	0.5534	100	0	0	0	-	-	0	0	JUNK	0	0	1	1.21149	0	7.89189	0.54515	16.2838	0	0	FALSE	FALSE	-1	-1	0	0	0	0	0	0	BASPBJ0115_pilon (Unplaced)	LOWX|LOW|UNIQ|NON|PRI|NONE	-	-	LOWCOV	-	-	junk	1
BASENJISCAFF0085	1338	13	12.8759	99.2526	1328	11	11	0.5537	2.915	97.08	0	0	BASENJISCAFF0555	BASENJISCAFF0788	51.79	51.79	KEEP	1	0	1	47.8476	0	7703.44	0.55456	46.4939	0	0	FALSE	FALSE	-1	-1	0	0	0	0	0	0	BASPBJ0117_pilon (Unplaced)	PURE|HAP|HOMO|TOP|PRI|NONE	GOOD|DIP|HOMO|TOP|ALT|NONE	GOOD|EXS|HOMO|TOP|REP|NONE	HPURGE	PRIMARY	PRIMARY	quarantine	1
BASENJISCAFF0086	1478	1	1	100	1478	0	1	0.4055	100	0	0	0	-	-	0	0	JUNK	0	0	1	619.919	0	27239.9	0.39648	35.2617	0	0	FALSE	FALSE	-1	-1	0	0	0	0	0	0	BASPBJ0118_pilon (Unplaced)	LOWX|LOW|UNIQ|NON|PRI|NONE	-	-	LOWCOV	-	-	junk	1
BASENJISCAFF0087	13940	76	81.1907	100	13940	184	260	0.542	2.575	11.51	29.2	56.71	BASENJICHR35.02	BASENJICHR1.02	77.8	536.49	KEEP	0	0	256	621.687	36157	45437.1	0.54433	95.0913	0	0	FALSE	FALSE	-1	-1	0	0	0	0	0	0	BASPBJ0119_pilon (Unplaced) Diploidocus:PRIMARY|PRIMARY|PRIMARY|PRIMARY|PRIMARY|PRIMARY	GOOD|EXS|REPT|NON|REP|NONE	GOOD|EXS|REPT|TOP|REP|NONE	WEAK|DIP|REPT|TOP|REP|NONE	PRIMARY	PRIMARY	PRIMARY	keep	7
BASENJISCAFF0088	2440	5	5.0984	100	2440	7	1	0.5108	100	0	0	0	-	-	0	0	JUNK	0	0	1	195.039	0	25833.5	0.5168	28.5833	0	0	FALSE	FALSE	-1	-1	0	0	0	0	0	0	BASPBJ0120_pilon (Unplaced)	PURE|LOW|UNIQ|NON|PRI|NONE	-	-	HPURGE	-	-	quarantine	1
BASENJISCAFF0089	1197	14	11.8571	100	1197	17	2	0.5094	24.48	75.52	0	0	BASENJISCAFF0664	BASENJISCAFF0473	77.86	162.49	KEEP	0	0	11	1030.08	372	127078	0.52047	72.6729	0	0	FALSE	FALSE	-1	-1	0	0	0	0	0	0	BASPBJ0121_pilon (Unplaced)	GOOD|HAP|HOMO|NON|REP|NONE	GOOD|HAP|REPT|TOP|REP|NONE	GOOD|EXS|REPT|TOP|REP|NONE	HPURGE	PRIMARY	PRIMARY	quarantine	1
BASENJISCAFF0090	520	6	5.5808	100	520	1	6	0.5063	100	0	0	0	-	-	0	0	JUNK	0	0	1	289.783	0	75032	0.50577	47.9757	0	0	FALSE	FALSE	-1	-1	0	0	0	0	0	0	BASPBJ0122_pilon (Unplaced)	PURE|LOW|UNIQ|NON|PRI|NONE	-	-	HPURGE	-	-	quarantine	1
BASENJISCAFF0091	129	1	1	100	129	1	0	0.5082	100	0	0	0	-	-	0	0	JUNK	0	0	5	112.019	88	39536.4	0.51938	65.0485	0	0	FALSE	FALSE	-1	-1	0	0	0	0	0	0	BASPBJ0123_pilon (Unplaced)	LOWX|LOW|UNIQ|NON|REP|NONE	-	-	LOWCOV	-	-	junk	1
BASENJISCAFF0092	2101	169	158.649	100	2101	124	128	0.5543	0	0	0.333	99.67	-	-	0	0	JUNK	0	0	11	158.025	4238	30785.1	0.57687	100	0	0	FALSE	FALSE	-1	-1	0	0	0	0	0	0	BASPBJ0125_pilon (Unplaced) Diploidocus:COLLAPSED|COLLAPSED|COLLAPSED|COLLAPSED|COLLAPSED|COLLAPSED	PURE|EXS|UNIQ|NON|REP|NONE	-	-	COLLAPSED	-	-	repeat	7
BASENJISCAFF0093	513	0	0	0	0	0	0	0	100	0	0	0	-	-	0	0	KEEP	0	0	1	4.10062	0	7.75975	0.33528	3.6961	0	0	FALSE	FALSE	-1	-1	0	0	0	0	0	0	BASPBJ0126_pilon (Unplaced)	LOWX|LOW|UNIQ|NON|PRI|NONE	-	-	LOWCOV	-	-	junk	1
BASENJISCAFF0094	1765	1	0.9989	99.8867	1763	0	1	0.5607	100	0	0	0	-	-	0	0	JUNK	0	0	1	1.26797	0	27.9189	0.56487	11.9609	0	0	FALSE	FALSE	-1	-1	0	0	0	0	0	0	BASPBJ0127_pilon (Unplaced)	LOWX|LOW|UNIQ|NON|PRI|NONE	-	-	LOWCOV	-	-	junk	1
BASENJISCAFF0095	4075	15	15.3622	100	4075	10	13	0.3965	0.098	99.9	0	0	BASENJICHR38.01	BASENJICHR29.01	81.79	248.54	KEEP	0	0	1	48.3633	25	2989.06	0.37374	52.9019	0	0	FALSE	FALSE	-1	-1	0	0	0	0	0	0	BASPBJ0128_pilon (Unplaced)	PURE|HAP|HOMO|NON|PRI|NONE	PURE|DIP|UNIQ|TOP|PRI|COMP	PURE|DIP|UNIQ|TOP|PRI|COMP	HPURGE	PRIMARY	PRIMARY	quarantine	1
BASENJISCAFF0096	8720	116	121.087	100	8720	329	26	0.5069	0	2.328	16.97	80.7	-	-	0	0	JUNK	0	0	745	1031.55	325186	306535	0.51628	92.3625	0	0	FALSE	FALSE	-1	-1	0	0	0	0	0	0	BASPBJ0129_pilon (Unplaced) Diploidocus:COLLAPSED|COLLAPSED|COLLAPSED|COLLAPSED|COLLAPSED|COLLAPSED	PURE|EXS|UNIQ|NON|REP|NONE	-	-	COLLAPSED	-	-	repeat	7
BASENJISCAFF0097	5664	2	1.645	100	5664	0	4	0.5031	100	0	0	0	-	-	0	0	JUNK	0	0	1	207.271	0	27821.6	0.51554	23.6077	0	0	FALSE	FALSE	-1	-1	0	0	0	0	0	0	BASPBJ0130_pilon (Unplaced)	LOWX|LOW|UNIQ|NON|PRI|NONE	-	-	LOWCOV	-	-	junk	1
BASENJISCAFF0098	14992	610	573.156	100	14992	532	523	0.5007	0.007	0	0	99.99	-	-	0	0	JUNK	0	0	506	968.084	270745	287562	0.50714	97.334	0	0	FALSE	FALSE	-1	-1	0	0	0	0	0	0	BASPBJ0131_pilon (Unplaced) Diploidocus:COLLAPSED|COLLAPSED|COLLAPSED|COLLAPSED|COLLAPSED|COLLAPSED	PURE|EXS|UNIQ|NON|REP|NONE	-	-	COLLAPSED	-	-	repeat	7
BASENJISCAFF0099	77979	22	26.4431	100	77979	164	126	0.5069	11.83	42.64	45.53	0	BASENJISCAFF0299	BASENJISCAFF0135	97.52	1876.51	REPEAT	0	0	1766	1939.74	205226	259366	0.51498	96.9815	0	0	FALSE	FALSE	-1	-1	0	0	0	0	0	0	BASPBJ0132_pilon (Unplaced) Diploidocus:PRIMARY|PRIMARY|PRIMARY|PRIMARY|PRIMARY|PRIMARY	WEAK|DIP|REPT|NON|REP|NONE	GOOD|EXS|REPT|TOP|REP|NONE	WEAK|HAP|REPT|TOP|REP|NONE	PRIMARY	PRIMARY	KEEP	keep	7
BASENJISCAFF0100	15869	206	222.807	99.792	15836	482	561	0.5499	8.098	3.825	1.072	87.01	-	-	0	0	JUNK	0	0	52	215.286	10219	30566.8	0.57313	83.7531	0	0	FALSE	FALSE	-1	-1	0	0	0	0	0	0	BASPBJ0133_pilon (Unplaced) Diploidocus:COLLAPSED|COLLAPSED|COLLAPSED|COLLAPSED|COLLAPSED|COLLAPSED	PURE|EXS|UNIQ|NON|REP|NONE	-	-	COLLAPSED	-	-	repeat	7
BASENJISCAFF0101	2849	30	23.2685	100	2849	35	31	0.5483	39.1	4.001	56.9	0	BASENJICHR6.01	BASENJICHR35.02	90.84	153.91	KEEP	0	0	2	181.163	637	18913.6	0.50404	62.8055	0	0	FALSE	FALSE	-1	-1	0	0	0	0	0	0	BASPBJ0134_pilon (Unplaced) Diploidocus:PRIMARY|PRIMARY|PRIMARY|PRIMARY|PRIMARY|PRIMARY	GOOD|DIP|HOMO|NON|ALT|NONE	PURE|DIP|UNIQ|TOP|PRI|COMP|+VEC	GOOD|EXS|REPT|TOP|REP|NONE	PRIMARY	PRIMARY	PRIMARY	keep	7
BASENJISCAFF0102	15348	36	36.1783	100	15348	54	67	0.5082	0.319	25.82	73.86	0	BASENJISCAFF0473	BASENJICHR8.03	92.51	1415.33	KEEP	0	0	1660	1741.39	193130	238613	0.51564	85.0933	0	0	FALSE	FALSE	-1	-1	0	0	0	0	0	0	BASPBJ0136_pilon (Unplaced) Diploidocus:PRIMARY|PRIMARY|PRIMARY|PRIMARY|PRIMARY|PRIMARY	GOOD|DIP|REPT|NON|REP|NONE	GOOD|EXS|REPT|TOP|REP|NONE	GOOD|DIP|REPT|TOP|REP|NONE	PRIMARY	PRIMARY	PRIMARY	keep	7
BASENJISCAFF0103	491	1	0.5193	51.9348	255	0	1	0.379	100	0	0	0	-	-	0	0	JUNK	0	0	1	1.72043	1	119.89	0.38493	50.9677	0	0	FALSE	FALSE	-1	-1	0	0	0	0	0	0	BASPBJ0137_pilon (Unplaced)	LOWX|LOW|UNIQ|NON|PRI|NONE	-	-	LOWCOV	-	-	junk	1
BASENJISCAFF0104	6755	199	179.75	100	6755	173	122	0.5071	0	0	3.479	96.52	-	-	0	0	JUNK	0	0	760	1215.4	349684	374272	0.5134	99.4353	0	0	FALSE	FALSE	-1	-1	0	0	0	0	0	0	BASPBJ0138_pilon (Unplaced) Diploidocus:COLLAPSED|COLLAPSED|COLLAPSED|COLLAPSED|COLLAPSED|COLLAPSED	PURE|EXS|UNIQ|NON|REP|NONE	-	-	COLLAPSED	-	-	repeat	7
BASENJISCAFF0105	3294	11	9.7417	100	3294	9	13	0.5022	27.08	72.92	0	0	BASENJISCAFF0299	BASENJICHR19.05	48.51	158.5	KEEP	0	0	1590	1602.78	167444	205153	0.50789	85.2509	0	0	FALSE	FALSE	-1	-1	0	0	0	0	0	0	BASPBJ0139_pilon (Unplaced)	GOOD|HAP|PART|NON|REP|NONE	GOOD|EXS|REPT|TOP|REP|NONE	GOOD|DIP|REPT|TOP|REP|NONE	HPURGE	COLLAPSED	PRIMARY	quarantine	1
BASENJISCAFF0106	26657	34	30.1642	100	26657	57	60	0.5101	0.004	34.87	65.13	0	BASENJISCAFF0498	BASENJISCAFF0810	96.05	334.02	REPEAT	0	0	1712	1872.7	200350	254522	0.51409	97.7395	0	0	FALSE	FALSE	-1	-1	0	0	0	0	0	0	BASPBJ0140_pilon (Unplaced) Diploidocus:PRIMARY|PRIMARY|PRIMARY|PRIMARY|PRIMARY|PRIMARY	GOOD|DIP|REPT|NON|REP|NONE	PURE|DIP|UNIQ|TOP|REP|NONE	GOOD|DIP|REPT|TOP|REP|NONE	PRIMARY	PRIMARY	PRIMARY	keep	7
BASENJISCAFF0107	3204	111	103.784	100	3204	67	102	0.5464	3.901	0.062	0.718	95.32	-	-	0	0	JUNK	0	0	3	93.4226	1227	16074.5	0.56835	84.9276	0	0	FALSE	FALSE	-1	-1	0	0	0	0	0	0	BASPBJ0141_pilon (Unplaced) Diploidocus:COLLAPSED|COLLAPSED|COLLAPSED|COLLAPSED|COLLAPSED|COLLAPSED	PURE|EXS|UNIQ|NON|REP|NONE	-	-	COLLAPSED	-	-	repeat	7
BASENJISCAFF0108	2390	1	1.0615	100	2390	1	1	0.4473	100	0	0	0	-	-	0	0	JUNK	0	0	1	34.2369	0	1068.05	0.45816	25.2538	0	0	FALSE	FALSE	-1	-1	0	0	0	0	0	0	BASPBJ0143_pilon (Unplaced)	LOWX|LOW|UNIQ|NON|PRI|NONE	-	-	LOWCOV	-	-	junk	1
BASENJISCAFF0109	1053	5	6.1083	100	1053	13	0	0.5094	54.32	45.68	0	0	BASENJISCAFF0898	BASENJISCAFF0672	5.6	9.4	KEEP	0	0	1	470.577	0	122507	0.53181	42.7459	0	0	FALSE	FALSE	-1	-1	0	0	0	0	0	0	BASPBJ0145_pilon (Unplaced)	GOOD|LOW|PART|NON|PRI|NONE	WEAK|LOW|REPT|TOP|REP|NONE	WEAK|EXS|HOMO|SEC|REP|NONE	HPURGE	PRIMARY	PRIMARY	quarantine	1
BASENJISCAFF0110	2255	38	46.0288	100	2255	43	58	0.5497	0	1.02	79.11	19.87	BASENJICHR35.02	BASENJISCAFF0002	25.5	97.29	KEEP	0	1	3	101.81	1508	17716.8	0.56319	98.9233	0	0	FALSE	FALSE	-1	-1	0	0	0	0	0	0	BASPBJ0146_pilon (Unplaced) Diploidocus:PRIMARY|PRIMARY|PRIMARY|PRIMARY|PRIMARY|PRIMARY	GOOD|DIP|PART|SEC|REP|NONE	GOOD|EXS|REPT|TOP|REP|NONE	GOOD|DIP|PART|SEC|REP|NONE	PRIMARY	PRIMARY	PRIMARY	keep	7
BASENJISCAFF0111	2115	10	10.1868	100	2115	19	0	0.3963	30.31	69.69	0	0	BASENJICHRX.01X	BASENJICHR29.01	75.89	147.99	KEEP	0	0	3810	3836.82	160823	156708	0.39433	95.0215	0	0	FALSE	FALSE	-1	-1	0	0	0	0	0	0	BASPBJ0147_pilon (Unplaced)	GOOD|HAP|HOMO|NON|REP|NONE	PURE|DIP|UNIQ|TOP|PRI|NONE|+TEL|+VEC	PURE|DIP|UNIQ|TOP|PRI|COMP	HPURGE	PRIMARY	PRIMARY	quarantine	1
BASENJISCAFF0112	741	15	13.054	100	741	11	6	0.4914	2.429	97.57	0	0	BASENJISCAFF0572	BASENJISCAFF0404	42.38	203.91	KEEP	0	0	2	729.999	2989	131988	0.49258	81.6783	0	0	FALSE	FALSE	-1	-1	0	0	0	0	0	0	BASPBJ0151_pilon (Unplaced)	PURE|HAP|PART|NON|ALT|NONE	GOOD|DIP|REPT|TOP|REP|NONE	WEAK|DIP|REPT|SEC|REP|NONE	HPURGE	PRIMARY	PRIMARY	quarantine	1
BASENJISCAFF0113	9772	147	197.839	100	9772	321	368	0.5516	0.123	18.89	5.659	75.33	BASENJICHR35.02	BASENJISCAFF1061	95.04	755.09	REPEAT	0	0	3	86.2005	968	16286.9	0.57071	68.2434	0	0	FALSE	FALSE	-1	-1	0	0	0	0	0	0	BASPBJ0152_pilon (Unplaced) Diploidocus:PRIMARY|COLLAPSED|COLLAPSED|COLLAPSED|COLLAPSED|COLLAPSED	GOOD|EXS|REPT|NON|REP|NONE	GOOD|EXS|REPT|TOP|REP|NONE	GOOD|EXS|REPT|SEC|REP|NONE	COLLAPSED	PRIMARY	COLLAPSED	repeat	7
BASENJISCAFF0114	1981	17	15.4099	100	1981	23	3	0.5109	17.92	82.08	0	0	BASENJISCAFF0135	BASENJISCAFF0664	63.05	146.29	KEEP	0	1	142	1426.78	29253	187778	0.52196	76.624	0	0	FALSE	FALSE	-1	-1	0	0	0	0	0	0	BASPBJ0153_pilon (Unplaced)	PURE|HAP|HOMO|SEC|REP|NONE	WEAK|LOW|REPT|TOP|REP|NONE	GOOD|HAP|REPT|TOP|REP|NONE	HPURGE	KEEP	PRIMARY	quarantine	1
BASENJISCAFF0115	3328	29	27.8648	100	3328	55	1	0.3963	5.829	36.9	57.27	0	BASENJICHR9.01	BASENJICHR14.01	93.15	736.45	KEEP	0	0	1737	1750.87	70975	76381.4	0.41617	88.3707	0	0	FALSE	FALSE	-1	-1	0	0	0	0	0	0	BASPBJ0155_pilon (Unplaced) Diploidocus:PRIMARY|PRIMARY|PRIMARY|PRIMARY|PRIMARY|PRIMARY	GOOD|DIP|REPT|NON|REP|NONE	PURE|DIP|UNIQ|TOP|PRI|COMP	PURE|DIP|UNIQ|SEC|PRI|COMP	PRIMARY	PRIMARY	PRIMARY	keep	7
BASENJISCAFF0116	2331	55	52.6538	99.6139	2322	37	49	0.5528	1.802	1.931	96.27	0	-	-	0	0	KEEP	0	0	4	103.602	1736	19596.1	0.56928	93.2755	0	0	FALSE	FALSE	-1	-1	0	0	0	0	0	0	BASPBJ0156_pilon (Unplaced) Diploidocus:PRIMARY|PRIMARY|PRIMARY|PRIMARY|PRIMARY|PRIMARY	PURE|DIP|UNIQ|NON|REP|NONE	-	-	PRIMARY	-	-	keep	7
BASENJISCAFF0117	535	1	1	100	535	1	0	0.319	100	0	0	0	-	-	0	0	JUNK	0	0	1	1.27898	0	235.31	0.31215	3.33988	0	0	FALSE	FALSE	-1	-1	0	0	0	0	0	0	BASPBJ0157_pilon (Unplaced)	LOWX|LOW|UNIQ|NON|PRI|NONE	-	-	LOWCOV	-	-	junk	1
BASENJISCAFF0118	719	6	5.5633	100	719	4	3	0.5628	100	0	0	0	-	-	0	0	JUNK	0	0	1	39.2395	0	6855.25	0.57163	41.7027	0	0	FALSE	FALSE	-1	-1	0	0	0	0	0	0	BASPBJ0159_pilon (Unplaced)	PURE|LOW|UNIQ|NON|PRI|NONE	-	-	HPURGE	-	-	quarantine	1
BASENJISCAFF0119	700	9	8.78	100	700	0	11	0.4151	27.71	72.29	0	0	-	-	0	0	KEEP	0	0	73	2798.54	2435	100392	0.43	77.8932	0	0	FALSE	FALSE	-1	-1	0	0	0	0	0	0	BASPBJ0160_pilon (Unplaced)	GOOD|HAP|UNIQ|NON|REP|NONE	-	-	HPURGE	-	-	quarantine	1
BASENJISCAFF0120	4396	8	8.081	100	4396	7	5	0.5092	37.65	62.35	0	0	BASENJICHR11.02	BASENJISCAFF0572	92.27	486.9	KEEP	0	0	1842	1919.95	198774	238237	0.51183	97.3684	0	0	FALSE	FALSE	-1	-1	0	0	0	0	0	0	BASPBJ0162_pilon (Unplaced)	GOOD|HAP|REPT|NON|REP|NONE	GOOD|DIP|REPT|TOP|REP|NONE	GOOD|DIP|REPT|TOP|REP|NONE	HPURGE	PRIMARY	PRIMARY	quarantine	1
BASENJISCAFF0121	947	0	0	0	0	0	0	0	100	0	0	0	-	-	0	0	KEEP	0	0	1	116.488	0	11810.6	0.5132	11.2921	0	0	FALSE	FALSE	-1	-1	0	0	0	0	0	0	BASPBJ0163_pilon (Unplaced)	LOWX|LOW|UNIQ|NON|PRI|NONE	-	-	LOWCOV	-	-	junk	1
BASENJISCAFF0122	2949	52	44.3177	100	2949	4	70	0.5099	0.034	16.28	83.69	0	-	-	0	0	KEEP	1	3	635	994.393	300685	296686	0.51238	85.6996	0	0	FALSE	FALSE	-1	-1	0	0	0	0	0	0	BASPBJ0164_pilon (Unplaced) Diploidocus:PRIMARY|PRIMARY|PRIMARY|PRIMARY|PRIMARY|PRIMARY	PURE|DIP|UNIQ|TOP|REP|NONE	-	-	PRIMARY	-	-	keep	7
BASENJISCAFF0123	761	17	15.4179	100	761	12	10	0.5534	4.993	95.01	0	0	BASENJISCAFF0257	BASENJICHR35.02	86.73	94.74	KEEP	0	0	2	64.5823	332	11290.9	0.55585	88.4354	0	0	FALSE	FALSE	-1	-1	0	0	0	0	0	0	BASPBJ0165_pilon (Unplaced)	PURE|HAP|HOMO|NON|ALT|NONE	GOOD|DIP|PART|TOP|PRI|NONE	GOOD|EXS|REPT|TOP|REP|NONE	HPURGE	PRIMARY	PRIMARY	quarantine	1
BASENJISCAFF0124	2669	1	0.9955	99.5504	2657	1	0	0.363	100	0	0	0	-	-	0	0	JUNK	0	0	1	1.69958	0	17.5687	0.37392	17.5936	0	0	FALSE	FALSE	-1	-1	0	0	0	0	0	0	BASPBJ0166_pilon (Unplaced)	LOWX|LOW|UNIQ|NON|PRI|NONE	-	-	LOWCOV	-	-	junk	1
BASENJISCAFF0125	3776	112	102.095	100	3776	118	103	0.5474	12.55	0	0	87.45	-	-	0	0	JUNK	0	0	4	104.288	1844	20046.4	0.56038	85.8133	0	0	FALSE	FALSE	-1	-1	0	0	0	0	0	0	BASPBJ0167_pilon (Unplaced) Diploidocus:COLLAPSED|COLLAPSED|COLLAPSED|COLLAPSED|COLLAPSED|COLLAPSED	PURE|EXS|UNIQ|NON|REP|NONE	-	-	COLLAPSED	-	-	repeat	7
BASENJISCAFF0126	607	2	2.3213	100	607	0	3	0.4094	100	0	0	0	-	-	0	0	JUNK	0	0	12	2486.53	240	90621.4	0.41845	63.8554	0	0	FALSE	FALSE	-1	-1	0	0	0	0	0	0	BASPBJ0168_pilon (Unplaced)	LOWX|LOW|UNIQ|NON|REP|NONE	-	-	LOWCOV	-	-	junk	1
BASENJISCAFF0127	2255	2	1.9969	100	2255	1	1	0.4927	100	0	0	0	-	-	0	0	JUNK	0	0	1	461.733	0	14237.9	0.49845	19.0668	0	0	FALSE	FALSE	-1	-1	0	0	0	0	0	0	BASPBJ0170_pilon (Unplaced)	LOWX|LOW|UNIQ|NON|PRI|NONE	-	-	LOWCOV	-	-	junk	1
BASENJISCAFF0128	1881	25	24.1877	100	1881	33	14	0.5476	0.106	52.26	47.63	0	BASENJICHR35.02	BASENJISCAFF0727	80.38	149.18	KEEP	0	0	10	173.27	1801	27406.8	0.57735	71.3747	0	0	FALSE	FALSE	-1	-1	0	0	0	0	0	0	BASPBJ0171_pilon (Unplaced) Diploidocus:PRIMARY|PRIMARY|PRIMARY|PRIMARY|PRIMARY|PRIMARY	GOOD|HAP|HOMO|NON|REP|NONE	GOOD|EXS|REPT|TOP|REP|NONE	PURE|DIP|UNIQ|SEC|REP|NONE	PRIMARY	PRIMARY	PRIMARY	keep	7
BASENJISCAFF0129	4675	8	8.5373	100	4675	5	13	0.508	45.75	54.25	0	0	BASENJISCAFF0833	BASENJISCAFF0356	96.98	533.93	KEEP	0	0	847	1345.92	333932	360857	0.51166	96.3003	0	0	FALSE	FALSE	-1	-1	0	0	0	0	0	0	BASPBJ0175_pilon (Unplaced)	GOOD|HAP|REPT|NON|REP|NONE	WEAK|DIP|REPT|TOP|REP|NONE	GOOD|LOW|PART|SEC|REP|NONE	HPURGE	PRIMARY	HPURGE	quarantine	1
BASENJISCAFF0130	26701	529	521.241	100	26701	69	1835	0.5052	0	0.06	14.27	85.67	-	-	0	0	JUNK	0	0	734	1000.44	310428	298902	0.51687	91.6851	0	0	FALSE	FALSE	-1	-1	0	0	0	0	0	0	BASPBJ0178_pilon (Unplaced) Diploidocus:COLLAPSED|COLLAPSED|COLLAPSED|COLLAPSED|COLLAPSED|COLLAPSED	PURE|EXS|UNIQ|NON|REP|NONE	-	-	COLLAPSED	-	-	repeat	7
BASENJISCAFF0131	759	9	8.4242	99.8682	758	0	10	0.5163	18.18	81.82	0	0	BASENJISCAFF0473	BASENJISCAFF0269	79.58	348.75	KEEP	0	0	45	1377.06	707	177334	0.51515	67.1214	0	0	FALSE	FALSE	-1	-1	0	0	0	0	0	0	BASPBJ0181_pilon (Unplaced)	PURE|HAP|REPT|NON|REP|NONE	GOOD|EXS|REPT|TOP|REP|NONE	WEAK|EXS|REPT|TOP|REP|NONE	HPURGE	PRIMARY	PRIMARY	quarantine	1
BASENJISCAFF0132	2236	42	39.6163	99.0608	2215	31	36	0.5486	1.61	10.42	87.97	0	-	-	0	0	KEEP	0	0	6	136.501	2474	23405.6	0.5644	96.0181	0	0	FALSE	FALSE	-1	-1	0	0	0	0	0	0	BASPBJ0183_pilon (Unplaced) Diploidocus:PRIMARY|PRIMARY|PRIMARY|PRIMARY|PRIMARY|PRIMARY	PURE|DIP|UNIQ|NON|REP|NONE	-	-	PRIMARY	-	-	keep	7
BASENJISCAFF0133	3595	77	90.6228	100	3595	20	186	0.5046	0	2.448	41.34	56.22	BASENJISCAFF0705	BASENJISCAFF0284	99.92	1449.51	KEEP	0	0	707	1001.59	328314	308946	0.51349	91.6503	0	0	FALSE	FALSE	-1	-1	0	0	0	0	0	0	BASPBJ0184_pilon (Unplaced) Diploidocus:PRIMARY|PRIMARY|PRIMARY|PRIMARY|PRIMARY|PRIMARY	GOOD|EXS|REPT|NON|REP|NONE	GOOD|DIP|REPT|TOP|REP|NONE	GOOD|EXS|HOMO|TOP|REP|NONE	PRIMARY	PRIMARY	PRIMARY	keep	7
BASENJISCAFF0134	2893	103	92.8382	99.8963	2890	92	72	0.5479	0.5872	0.3806	14.79	84.24	-	-	0	0	JUNK	0	0	6	74.1231	2437	13404.5	0.55859	90.7569	0	0	FALSE	FALSE	-1	-1	0	0	0	0	0	0	BASPBJ0185_pilon (Unplaced) Diploidocus:COLLAPSED|COLLAPSED|COLLAPSED|COLLAPSED|COLLAPSED|COLLAPSED	PURE|EXS|UNIQ|NON|REP|NONE	-	-	COLLAPSED	-	-	repeat	7
BASENJISCAFF0135	40777	15	64.9321	99.9951	40775	219	318	0.5128	30.63	34.79	11.66	22.92	BASENJISCAFF0473	BASENJISCAFF0070	91.57	2321.8	KEEP	5	4	2048	2275.77	229830	306963	0.52297	95.6811	0	0	FALSE	FALSE	-1	-1	0	0	0	0	0	0	BASPBJ0186_pilon (Unplaced) Diploidocus:KEEP|KEEP|KEEP|KEEP|KEEP|KEEP	WEAK|HAP|REPT|TOP|REP|NONE	GOOD|EXS|REPT|TOP|REP|NONE	GOOD|DIP|REPT|SEC|REP|NONE	KEEP	PRIMARY	PRIMARY	keep	7
BASENJISCAFF0136	535	3	2.615	99.0654	530	0	3	0.4979	100	0	0	0	-	-	0	0	JUNK	0	0	1	273.637	0	65216.3	0.54019	35.167	0	0	FALSE	FALSE	-1	-1	0	0	0	0	0	0	BASPBJ0187_pilon (Unplaced)	PURE|LOW|UNIQ|NON|PRI|NONE	-	-	HPURGE	-	-	quarantine	1
BASENJISCAFF0137	674	6	5.9139	100	674	0	8	0.4932	94.81	5.193	0	0	-	-	0	0	JUNK	0	0	2	405.636	1	103904	0.51187	51.2346	0	0	FALSE	FALSE	-1	-1	0	0	0	0	0	0	BASPBJ0188_pilon (Unplaced)	PURE|LOW|UNIQ|NON|ALT|NONE	-	-	HPURGE	-	-	quarantine	1
BASENJISCAFF0138	3624	243	229.303	100	3624	182	183	0.5091	0.386	0	0.386	99.23	-	-	0	0	JUNK	0	0	622	1077.93	297495	343280	0.51297	99.3608	0	0	FALSE	FALSE	-1	-1	0	0	0	0	0	0	BASPBJ0190_pilon (Unplaced) Diploidocus:COLLAPSED|COLLAPSED|COLLAPSED|COLLAPSED|COLLAPSED|COLLAPSED	PURE|EXS|UNIQ|NON|REP|NONE	-	-	COLLAPSED	-	-	repeat	7
BASENJISCAFF0139	1562	10	15.9706	100	1562	16	23	0.5448	32.46	35.66	31.88	0	BASENJISCAFF0290	BASENJICHR35.02	45.33	46.67	KEEP	0	0	1	51.8112	271	9468.88	0.55378	68.099	0	0	FALSE	FALSE	-1	-1	0	0	0	0	0	0	BASPBJ0191_pilon (Unplaced) Diploidocus:PRIMARY|PRIMARY|PRIMARY|PRIMARY|PRIMARY|PRIMARY	WEAK|HAP|PART|NON|PRI|NONE	PURE|DIP|UNIQ|TOP|REP|NONE	GOOD|EXS|REPT|TOP|REP|NONE	PRIMARY	PRIMARY	PRIMARY	keep	7
BASENJISCAFF0140	7198	1	0.8712	86.5657	6231	2	0	0.6552	100	0	0	0	-	-	0	0	JUNK	0	0	1	1.25376	0	8.01659	0.66338	12.005	0	0	FALSE	FALSE	-1	-1	0	0	0	0	0	0	BASPBJ0192_pilon (Unplaced)	LOWX|LOW|UNIQ|NON|PRI|NONE	-	-	LOWCOV	-	-	junk	1
BASENJISCAFF0141	1011	4	3.6944	100	1011	6	0	0.5489	100	0	0	0	-	-	0	0	JUNK	0	0	1	16.4071	0	3207.11	0.55193	23.6548	0	0	FALSE	FALSE	-1	-1	0	0	0	0	0	0	BASPBJ0193_pilon (Unplaced)	PURE|LOW|UNIQ|NON|PRI|NONE	-	-	HPURGE	-	-	quarantine	1
BASENJISCAFF0142	7686	162	170.547	99.9219	7680	201	208	0.5502	0.2729	0.3118	1.08	98.34	-	-	0	0	JUNK	0	0	6	125.03	2417	22400.1	0.56961	98.7467	0	0	FALSE	FALSE	-1	-1	0	0	0	0	0	0	BASPBJ0195_pilon (Unplaced) Diploidocus:COLLAPSED|COLLAPSED|COLLAPSED|COLLAPSED|COLLAPSED|COLLAPSED	PURE|EXS|UNIQ|NON|REP|NONE	-	-	COLLAPSED	-	-	repeat	7
BASENJISCAFF0143	1693	36	34.1506	100	1693	53	9	0.5069	0	16.48	83.52	0	-	-	0	0	KEEP	0	0	607	990.35	297440	289789	0.50679	89.5021	0	0	FALSE	FALSE	-1	-1	0	0	0	0	0	0	BASPBJ0196_pilon (Unplaced) Diploidocus:PRIMARY|PRIMARY|PRIMARY|PRIMARY|PRIMARY|PRIMARY	PURE|DIP|UNIQ|NON|REP|NONE	-	-	PRIMARY	-	-	keep	7
BASENJISCAFF0144	4051	44	39.8282	100	4051	51	41	0.5046	10.17	8.763	81.07	0	-	-	0	0	KEEP	0	0	581	1034.45	285760	304449	0.50654	87.354	0	0	FALSE	FALSE	-1	-1	0	0	0	0	0	0	BASPBJ0197_pilon (Unplaced) Diploidocus:PRIMARY|PRIMARY|PRIMARY|PRIMARY|PRIMARY|PRIMARY	PURE|DIP|UNIQ|NON|REP|NONE	-	-	PRIMARY	-	-	keep	7
BASENJISCAFF0145	1714	20	22.8133	100	1714	50	3	0.5455	1.225	55.66	43.12	0	BASENJISCAFF0700	BASENJISCAFF0282	96.85	160.97	HAPLOTIG	0	0	253	166.422	37950	31790.7	0.57176	80.0948	0	0	FALSE	FALSE	-1	-1	0	0	0	0	0	0	BASPBJ0198_pilon (Unplaced) Diploidocus:PRIMARY|PRIMARY|PRIMARY|PRIMARY|PRIMARY|PRIMARY	GOOD|HAP|HOMO|NON|REP|NONE	GOOD|DIP|REPT|TOP|PRI|NONE	GOOD|EXS|REPT|SEC|REP|NONE	PRIMARY	PRIMARY	PRIMARY	keep	7
BASENJISCAFF0146	847	2	1.9032	99.6458	844	1	2	0.519	100	0	0	0	-	-	0	0	JUNK	0	0	1	417.309	0	63924.2	0.53247	40.3167	0	0	FALSE	FALSE	-1	-1	0	0	0	0	0	0	BASPBJ0200_pilon (Unplaced)	LOWX|LOW|UNIQ|NON|PRI|NONE	-	-	LOWCOV	-	-	junk	1
BASENJISCAFF0147	2543	115	106.214	100	2543	96	107	0.5508	0	0	10.85	89.15	-	-	0	0	JUNK	0	0	5	123.401	2897	23202.1	0.56941	99.9603	0	0	FALSE	FALSE	-1	-1	0	0	0	0	0	0	BASPBJ0202_pilon (Unplaced) Diploidocus:COLLAPSED|COLLAPSED|COLLAPSED|COLLAPSED|COLLAPSED|COLLAPSED	PURE|EXS|UNIQ|NON|REP|NONE	-	-	COLLAPSED	-	-	repeat	7
BASENJISCAFF0148	197	1	0.5431	54.3147	107	1	0	0.5179	100	0	0	0	-	-	0	0	JUNK	0	0	1	24.7427	0	4388.75	0.53299	13.4503	0	0	FALSE	FALSE	-1	-1	0	0	0	0	0	0	BASPBJ0203_pilon (Unplaced)	LOWX|LOW|UNIQ|NON|PRI|NONE	-	-	LOWCOV	-	-	junk	1
BASENJISCAFF0149	4472	76	79.5047	100	4472	90	104	0.546	0.335	0.045	43.67	55.95	BASENJICHR35.02	BASENJISCAFF1038	99.37	371.09	REPEAT	0	0	6	117.441	3213	22339.8	0.56843	97.031	0	0	FALSE	FALSE	-1	-1	0	0	0	0	0	0	BASPBJ0204_pilon (Unplaced) Diploidocus:PRIMARY|PRIMARY|PRIMARY|PRIMARY|PRIMARY|PRIMARY	GOOD|EXS|REPT|NON|REP|NONE	GOOD|EXS|REPT|TOP|REP|NONE	PURE|DIP|UNIQ|SEC|REP|NONE	PRIMARY	PRIMARY	PRIMARY	keep	7
BASENJISCAFF0150	16825	42	37.1278	100	16825	53	52	0.5097	0.071	18.4	81.53	0	-	-	0	0	KEEP	1	1	1649	1667.27	193924	228379	0.5115	98.4166	0	0	FALSE	FALSE	-1	-1	0	0	0	0	0	0	BASPBJ0205_pilon (Unplaced) Diploidocus:PRIMARY|PRIMARY|PRIMARY|PRIMARY|PRIMARY|PRIMARY	PURE|DIP|UNIQ|TOP|REP|NONE	-	-	PRIMARY	-	-	keep	7
BASENJISCAFF0151	3826	27	27.7674	100	3826	19	39	0.5075	0.026	46.11	53.87	0	BASENJISCAFF0473	BASENJISCAFF0664	87.04	999.11	KEEP	0	1	1	659.414	8	99179	0.51228	55.5	0	0	FALSE	FALSE	-1	-1	0	0	0	0	0	0	BASPBJ0208_pilon (Unplaced) Diploidocus:PRIMARY|PRIMARY|PRIMARY|PRIMARY|PRIMARY|PRIMARY	GOOD|DIP|REPT|SEC|PRI|NONE	GOOD|EXS|REPT|TOP|REP|NONE	GOOD|HAP|REPT|TOP|REP|NONE	PRIMARY	PRIMARY	PRIMARY	keep	7
BASENJISCAFF0152	655	10	10.8382	100	655	2	12	0.5082	1.221	98.78	0	0	BASENJISCAFF0590	BASENJISCAFF0714	56.79	71.15	KEEP	0	0	29	698.288	1457	193325	0.51756	71.2242	0	0	FALSE	FALSE	-1	-1	0	0	0	0	0	0	BASPBJ0209_pilon (Unplaced)	PURE|HAP|HOMO|NON|REP|NONE	PURE|HAP|HOMO|TOP|REP|NONE	PURE|DIP|UNIQ|SEC|REP|NONE	HPURGE	HPURGE	PRIMARY	quarantine	1
BASENJISCAFF0153	2938	0	0	0	0	0	0	0	100	0	0	0	-	-	0	0	KEEP	0	0	1	2.55529	0	52.5838	0.64091	10.6799	0	0	FALSE	FALSE	-1	-1	0	0	0	0	0	0	BASPBJ0210_pilon (Unplaced)	LOWX|LOW|UNIQ|NON|PRI|NONE	-	-	LOWCOV	-	-	junk	1
BASENJISCAFF0154	1243	1	1.3942	99.8391	1241	0	3	0.5291	100	0	0	0	-	-	0	0	JUNK	0	0	1	11.9811	0	1746.78	0.52212	17.5021	0	0	FALSE	FALSE	-1	-1	0	0	0	0	0	0	BASPBJ0211_pilon (Unplaced)	LOWX|LOW|UNIQ|NON|PRI|NONE	-	-	LOWCOV	-	-	junk	1
BASENJISCAFF0155	2159	33	29.9	100	2159	19	32	0.5072	0.417	23.81	75.78	0	BASENJISCAFF0284	BASENJISCAFF0190	98.38	1059.01	REPEAT	0	0	626	1030	292989	323626	0.51274	98.0778	0	0	FALSE	FALSE	-1	-1	0	0	0	0	0	0	BASPBJ0212_pilon (Unplaced) Diploidocus:PRIMARY|PRIMARY|PRIMARY|PRIMARY|PRIMARY|PRIMARY	GOOD|DIP|REPT|NON|REP|NONE	GOOD|EXS|HOMO|TOP|REP|NONE	WEAK|EXS|REPT|TOP|REP|NONE	PRIMARY	PRIMARY	PRIMARY	keep	7
BASENJISCAFF0156	529	0	0	0	0	0	0	0	100	0	0	0	-	-	0	0	KEEP	0	0	1	534.682	0	24741.1	0.38752	35.7853	0	0	FALSE	FALSE	-1	-1	0	0	0	0	0	0	BASPBJ0214_pilon (Unplaced)	LOWX|LOW|UNIQ|NON|PRI|NONE	-	-	LOWCOV	-	-	junk	1
BASENJISCAFF0157	1250	1	0.6912	69.12	864	0	1	0.374	100	0	0	0	-	-	0	0	JUNK	0	0	1	65.9559	0	2859.38	0.3808	39.6242	0	0	FALSE	FALSE	-1	-1	0	0	0	0	0	0	BASPBJ0215_pilon (Unplaced)	LOWX|LOW|UNIQ|NON|PRI|NONE	-	-	LOWCOV	-	-	junk	1
BASENJISCAFF0158	1179	24	22.9059	100	1179	13	17	0.5561	0	97.8	2.205	0	BASENJISCAFF0038	BASENJICHR35.02	80.49	91.52	KEEP	1	0	2	100.175	760	17628.2	0.56997	91.0668	0	0	FALSE	FALSE	-1	-1	0	0	0	0	0	0	BASPBJ0216_pilon (Unplaced) Diploidocus:PRIMARY	PURE|HAP|HOMO|TOP|ALT|NONE	GOOD|DIP|HOMO|TOP|PRI|NONE	GOOD|EXS|REPT|TOP|REP|NONE	HPURGE	PRIMARY	PRIMARY	quarantine	2
BASENJISCAFF0159	2271	34	29.8085	99.9119	2269	30	21	0.5425	12.51	3.214	84.28	0	-	-	0	0	KEEP	0	0	2	45.9684	606	8855.47	0.55923	90.6013	0	0	FALSE	FALSE	-1	-1	0	0	0	0	0	0	BASPBJ0217_pilon (Unplaced) Diploidocus:PRIMARY|PRIMARY|PRIMARY|PRIMARY|PRIMARY|PRIMARY	PURE|DIP|UNIQ|NON|ALT|NONE	-	-	PRIMARY	-	-	keep	7
BASENJISCAFF0160	657	86	82.6271	100	657	50	47	0.5534	0	0.152	8.371	91.48	-	-	0	0	JUNK	0	0	2	3.30745	1466	2245.57	0.58752	94.1363	0	0	FALSE	FALSE	-1	-1	0	0	0	0	0	0	BASPBJ0218_pilon (Unplaced) Diploidocus:COLLAPSED|COLLAPSED|COLLAPSED|COLLAPSED|COLLAPSED|COLLAPSED	PURE|EXS|UNIQ|NON|ALT|NONE	-	-	COLLAPSED	-	-	repeat	7
BASENJISCAFF0161	3646	259	242.4	100	3646	240	174	0.5497	0.384	0	0.055	99.56	-	-	0	0	JUNK	0	0	2	89.0757	1152	16198.5	0.56199	93.8122	0	0	FALSE	FALSE	-1	-1	0	0	0	0	0	0	BASPBJ0219_pilon (Unplaced) Diploidocus:COLLAPSED|COLLAPSED|COLLAPSED|COLLAPSED|COLLAPSED|COLLAPSED	PURE|EXS|UNIQ|NON|ALT|NONE	-	-	COLLAPSED	-	-	repeat	7
BASENJISCAFF0162	73283	29	28.6662	100	73283	140	152	0.5098	0.005	16.88	83.11	0	-	-	0	0	KEEP	0	1	1776	1990.84	206951	262660	0.51098	99.6219	0	0	FALSE	FALSE	-1	-1	0	0	0	0	0	0	BASPBJ0220_pilon (Unplaced) Diploidocus:PRIMARY|PRIMARY|PRIMARY|PRIMARY|PRIMARY|PRIMARY	PURE|DIP|UNIQ|SEC|REP|NONE	-	-	PRIMARY	-	-	keep	7
BASENJISCAFF0163	1596	3	3.4442	100	1596	4	3	0.5489	100	0	0	0	-	-	0	0	JUNK	0	0	1	31.772	0	5605.11	0.55702	33.3758	0	0	FALSE	FALSE	-1	-1	0	0	0	0	0	0	BASPBJ0221_pilon (Unplaced)	PURE|LOW|UNIQ|NON|PRI|NONE	-	-	HPURGE	-	-	quarantine	1
BASENJISCAFF0164	953	43	40.0336	100	953	30	27	0.3731	0	0.315	99.69	0	-	-	0	0	KEEP	0	0	29	1920.62	2683	80229	0.37671	100	0	0	FALSE	FALSE	-1	-1	0	0	0	0	0	0	BASPBJ0224_pilon (Unplaced) Diploidocus:PRIMARY|PRIMARY|PRIMARY|PRIMARY|PRIMARY|PRIMARY	PURE|DIP|UNIQ|NON|REP|NONE	-	-	PRIMARY	-	-	keep	7
BASENJISCAFF0165	2123	34	33.4244	100	2123	57	5	0.5118	0	5.652	94.35	0	-	-	0	0	KEEP	0	0	1	527.604	0	75598.8	0.51578	48.1164	0	0	FALSE	FALSE	-1	-1	0	0	0	0	0	0	BASPBJ0225_pilon (Unplaced) Diploidocus:PRIMARY|PRIMARY|PRIMARY|PRIMARY|PRIMARY|PRIMARY	PURE|DIP|UNIQ|NON|PRI|NONE	-	-	PRIMARY	-	-	keep	7
BASENJISCAFF0166	2362	15	14.4594	100	2362	1	29	0.5084	13.42	86.58	0	0	BASENJISCAFF0269	BASENJISCAFF0473	78.37	641.96	KEEP	0	1	1598	1689.01	170496	213136	0.51228	79.1524	0	0	FALSE	FALSE	-1	-1	0	0	0	0	0	0	BASPBJ0226_pilon (Unplaced)	PURE|HAP|REPT|SEC|REP|NONE	WEAK|EXS|REPT|TOP|REP|NONE	GOOD|EXS|REPT|TOP|REP|NONE	HPURGE	PRIMARY	PRIMARY	quarantine	1
BASENJISCAFF0167	2500	240	222.495	100	2500	205	171	0.5436	0	0.28	5.92	93.8	-	-	0	0	JUNK	0	0	10	176.762	5271	28093.8	0.5808	97.2514	0	0	FALSE	FALSE	-1	-1	0	0	0	0	0	0	BASPBJ0227_pilon (Unplaced) Diploidocus:COLLAPSED|COLLAPSED|COLLAPSED|COLLAPSED|COLLAPSED|COLLAPSED	PURE|EXS|UNIQ|NON|REP|NONE	-	-	COLLAPSED	-	-	repeat	7
BASENJISCAFF0168	2658	1	1.3446	99.7743	2652	2	1	0.461	100	0	0	0	-	-	0	0	JUNK	0	0	1	1.79711	0	79.0889	0.44846	29.5973	0	0	FALSE	FALSE	-1	-1	0	0	0	0	0	0	BASPBJ0228_pilon (Unplaced)	LOWX|LOW|UNIQ|NON|PRI|NONE	-	-	LOWCOV	-	-	junk	1
BASENJISCAFF0169	710	2	2.3197	99.1549	704	0	3	0.4968	100	0	0	0	-	-	0	0	JUNK	0	0	4	761.139	2	80798.7	0.51268	56.7251	0	0	FALSE	FALSE	-1	-1	0	0	0	0	0	0	BASPBJ0230_pilon (Unplaced)	LOWX|LOW|UNIQ|NON|REP|NONE	-	-	LOWCOV	-	-	junk	1
BASENJISCAFF0170	3921	253	218.001	100	3921	180	174	0.5512	9.844	0	0.102	90.05	-	-	0	0	JUNK	0	0	3	108.615	2390	20134	0.56797	91.3479	0	0	FALSE	FALSE	-1	-1	0	0	0	0	0	0	BASPBJ0231_pilon (Unplaced) Diploidocus:COLLAPSED|COLLAPSED|COLLAPSED|COLLAPSED|COLLAPSED|COLLAPSED	PURE|EXS|UNIQ|NON|REP|NONE	-	-	COLLAPSED	-	-	repeat	7
BASENJISCAFF0171	29639	38	173.721	100	29639	430	411	0.4925	1.785	20.31	29.88	48.03	BASENJICHR16.01	BASENJICHR19.02	97.26	513.08	REPEAT	0	0	1	400.368	134	11407.2	0.45528	65.0728	0	0	FALSE	FALSE	-1	-1	0	0	0	0	0	0	BASPBJ0233_pilon (Unplaced) Diploidocus:PRIMARY|PRIMARY|PRIMARY|PRIMARY|PRIMARY|PRIMARY	WEAK|EXS|REPT|NON|PRI|NONE	PURE|DIP|UNIQ|TOP|PRI|COMP	GOOD|EXS|HOMO|SEC|PRI|FRAG	PRIMARY	PRIMARY	PRIMARY	keep	7
BASENJISCAFF0172	1033	7	9.1045	81.3166	840	13	6	0.5517	51.31	48.69	0	0	BASENJICHR35.02	BASENJISCAFF0513	81.7	193.8	KEEP	0	0	1	44.3644	0	8632.7	0.54211	48.0636	0	0	FALSE	FALSE	-1	-1	0	0	0	0	0	0	BASPBJ0234_pilon (Unplaced)	GOOD|LOW|HOMO|NON|PRI|NONE	GOOD|EXS|REPT|TOP|REP|NONE	GOOD|EXS|REPT|TOP|REP|NONE	HPURGE	PRIMARY	COLLAPSED	quarantine	1
BASENJISCAFF0173	722	8	7.9695	99.8615	721	13	0	0.3846	39.75	60.25	0	0	BASENJICHR29.01	BASENJISCAFF0672	65.65	101.66	KEEP	0	0	2473	3080.4	107470	131310	0.3795	93.8218	0	0	FALSE	FALSE	-1	-1	0	0	0	0	0	0	BASPBJ0235_pilon (Unplaced)	GOOD|HAP|HOMO|NON|REP|NONE	PURE|DIP|UNIQ|TOP|PRI|COMP	WEAK|EXS|HOMO|SEC|REP|NONE	HPURGE	PRIMARY	PRIMARY	quarantine	1
BASENJISCAFF0174	2954	186	178.593	100	2954	147	135	0.554	0	0	0.305	99.7	-	-	0	0	JUNK	0	0	15	159.943	7565	28889.1	0.5738	99.5219	0	0	FALSE	FALSE	-1	-1	0	0	0	0	0	0	BASPBJ0236_pilon (Unplaced) Diploidocus:COLLAPSED|COLLAPSED|COLLAPSED|COLLAPSED|COLLAPSED|COLLAPSED	PURE|EXS|UNIQ|NON|REP|NONE	-	-	COLLAPSED	-	-	repeat	7
BASENJISCAFF0175	2324	70	67.969	100	2324	95	34	0.5058	0	1.807	44.71	53.48	BASENJISCAFF1053	BASENJISCAFF0028	59.64	189.24	KEEP	0	0	376	767.21	221518	234152	0.51764	82.55	0	0	FALSE	FALSE	-1	-1	0	0	0	0	0	0	BASPBJ0238_pilon (Unplaced) Diploidocus:PRIMARY|PRIMARY|PRIMARY|PRIMARY|PRIMARY|PRIMARY	GOOD|EXS|HOMO|NON|REP|NONE	GOOD|EXS|REPT|TOP|REP|NONE	GOOD|DIP|REPT|SEC|REP|NONE	PRIMARY	PRIMARY	PRIMARY	keep	7
BASENJISCAFF0176	772	9	8.9132	100	772	5	7	0.5326	5.699	94.3	0	0	BASENJISCAFF0435	BASENJISCAFF0772	70.73	104.4	KEEP	0	0	2	62.0684	563	10421.3	0.55181	63.941	0	0	FALSE	FALSE	-1	-1	0	0	0	0	0	0	BASPBJ0241_pilon (Unplaced)	PURE|HAP|HOMO|NON|ALT|NONE	GOOD|DIP|REPT|TOP|ALT|NONE	GOOD|DIP|HOMO|SEC|REP|NONE	HPURGE	PRIMARY	PRIMARY	quarantine	1
BASENJISCAFF0177	3601	14	18.9445	100	3601	30	19	0.5072	2.111	69.81	28.08	0	BASENJISCAFF0705	BASENJISCAFF0284	95.72	1091.92	KEEP	1	0	712	941.388	330740	302582	0.51291	86.8252	0	0	FALSE	FALSE	-1	-1	0	0	0	0	0	0	BASPBJ0242_pilon (Unplaced) Diploidocus:PRIMARY|PRIMARY|PRIMARY|PRIMARY|PRIMARY|PRIMARY	GOOD|HAP|REPT|TOP|REP|NONE	GOOD|DIP|REPT|TOP|REP|NONE	GOOD|EXS|HOMO|TOP|REP|NONE	PRIMARY	PRIMARY	PRIMARY	keep	7
BASENJISCAFF0178	460	14	16.8196	100	460	16	9	0.3865	1.304	98.7	0	0	BASENJICHR20.01	BASENJICHR1.03	85.87	171.74	KEEP	0	0	15	975.707	3988	46488.2	0.40217	98.3871	0	0	FALSE	FALSE	-1	-1	0	0	0	0	0	0	BASPBJ0243_pilon (Unplaced)	PURE|HAP|HOMO|NON|REP|NONE	PURE|DIP|UNIQ|TOP|PRI|COMP|+VEC	WEAK|EXS|REPT|TOP|REP|NONE	LOWQUAL	PRIMARY	PRIMARY	quarantine	1
BASENJISCAFF0179	2640	1	1	100	2640	1	0	0.6404	100	0	0	0	-	-	0	0	JUNK	0	0	1	1.12395	0	5.22992	0.65417	10.0229	0	0	FALSE	FALSE	-1	-1	0	0	0	0	0	0	BASPBJ0245_pilon (Unplaced)	LOWX|LOW|UNIQ|NON|PRI|NONE	-	-	LOWCOV	-	-	junk	1
BASENJISCAFF0180	2750	15	16.3447	99.9636	2749	29	3	0.513	4.327	80.84	14.84	0	BASENJISCAFF0473	BASENJISCAFF0325	83.78	702.84	KEEP	0	0	439	1473.66	53645	178025	0.52255	80.9839	0	0	FALSE	FALSE	-1	-1	0	0	0	0	0	0	BASPBJ0246_pilon (Unplaced)	PURE|HAP|REPT|NON|REP|NONE	GOOD|EXS|REPT|TOP|REP|NONE	GOOD|EXS|REPT|TOP|REP|NONE	HPURGE	PRIMARY	PRIMARY	quarantine	1
BASENJISCAFF0181	3845	8	7.4094	100	3845	2	12	0.5081	42.86	57.14	0	0	BASENJISCAFF0473	BASENJISCAFF1048	94.04	1571.99	KEEP	0	0	7	1116.84	138	140269	0.51704	56.8997	0	0	FALSE	FALSE	-1	-1	0	0	0	0	0	0	BASPBJ0249_pilon (Unplaced)	GOOD|HAP|REPT|NON|REP|NONE	GOOD|EXS|REPT|TOP|REP|NONE	PURE|DIP|UNIQ|SEC|REP|NONE	HPURGE	PRIMARY	PRIMARY	quarantine	1
BASENJISCAFF0182	2056	37	35.7592	100	2056	73	1	0.3813	2.432	24.76	72.81	0	BASENJICHR9.01	BASENJICHR11.01	76.95	482.83	KEEP	0	0	2245	2120.41	100110	92764.6	0.38473	91.133	0	0	FALSE	FALSE	-1	-1	0	0	0	0	0	0	BASPBJ0250_pilon (Unplaced) Diploidocus:PRIMARY|PRIMARY|PRIMARY|PRIMARY|PRIMARY|PRIMARY	GOOD|DIP|REPT|NON|REP|NONE	PURE|DIP|UNIQ|TOP|PRI|COMP	PURE|DIP|UNIQ|TOP|PRI|COMP	PRIMARY	PRIMARY	PRIMARY	keep	7
BASENJISCAFF0183	8567	26	22.0279	100	8567	58	4	0.5076	18.98	29.29	51.73	0	BASENJISCAFF0135	BASENJISCAFF0299	97.89	2790.59	REPEAT	0	0	1712	1752.47	196138	236357	0.52259	84.8144	0	0	FALSE	FALSE	-1	-1	0	0	0	0	0	0	BASPBJ0251_pilon (Unplaced) Diploidocus:PRIMARY|PRIMARY|PRIMARY|PRIMARY|PRIMARY|PRIMARY	GOOD|DIP|REPT|NON|REP|NONE	WEAK|HAP|REPT|TOP|REP|NONE	GOOD|EXS|REPT|TOP|REP|NONE	PRIMARY	KEEP	PRIMARY	keep	7
BASENJISCAFF0184	3387	1630	1487.03	98.7304	3344	1077	1083	0.4446	1.27	0.05924	1.092	97.58	-	-	0	0	JUNK	0	0	19	429.763	7568	20758	0.45586	94.823	0	0	FALSE	FALSE	-1	-1	0	0	0	0	0	0	BASPBJ0252_pilon (Unplaced) Diploidocus:COLLAPSED|COLLAPSED|COLLAPSED|COLLAPSED|COLLAPSED|COLLAPSED	PURE|EXS|UNIQ|NON|REP|NONE	-	-	COLLAPSED	-	-	repeat	7
BASENJISCAFF0185	1880	44	42.716	100	1880	25	33	0.5512	0	0.479	99.52	0	-	-	0	0	KEEP	0	1	4	75.7033	1932	14945.6	0.56862	98.8673	0	0	FALSE	FALSE	-1	-1	0	0	0	0	0	0	BASPBJ0253_pilon (Unplaced) Diploidocus:PRIMARY|PRIMARY|PRIMARY|PRIMARY|PRIMARY|PRIMARY	PURE|DIP|UNIQ|SEC|REP|NONE	-	-	PRIMARY	-	-	keep	7
BASENJISCAFF0186	1054	2	2.7125	100	1054	0	4	0.5025	100	0	0	0	-	-	0	0	JUNK	0	0	1	418.669	0	53348.7	0.50759	42.3152	0	0	FALSE	FALSE	-1	-1	0	0	0	0	0	0	BASPBJ0255_pilon (Unplaced)	LOWX|LOW|UNIQ|NON|PRI|NONE	-	-	LOWCOV	-	-	junk	1
BASENJISCAFF0187	3502	110	103.686	100	3502	113	86	0.5498	0	0.029	5.882	94.09	-	-	0	0	JUNK	0	0	4	118.018	2249	21387.3	0.56425	100	0	0	FALSE	FALSE	-1	-1	0	0	0	0	0	0	BASPBJ0256_pilon (Unplaced) Diploidocus:COLLAPSED|COLLAPSED|COLLAPSED|COLLAPSED|COLLAPSED|COLLAPSED	PURE|EXS|UNIQ|NON|REP|NONE	-	-	COLLAPSED	-	-	repeat	7
BASENJISCAFF0188	7398	19	52.37	100	7398	4	228	0.4143	0.365	54.7	17.29	27.64	BASENJISCAFF0299	BASENJISCAFF0664	54.3	768.91	KEEP	0	1	7	1265.91	181	95747.5	0.46053	63.2664	0	0	FALSE	FALSE	-1	-1	0	0	0	0	0	0	BASPBJ0261_pilon (Unplaced) Diploidocus:KEEP|KEEP|KEEP|KEEP|KEEP|KEEP	GOOD|HAP|REPT|SEC|REP|NONE	GOOD|EXS|REPT|TOP|REP|NONE	GOOD|HAP|REPT|TOP|REP|NONE	KEEP	PRIMARY	PRIMARY	keep	7
BASENJISCAFF0189	1344	11	12.0722	100	1344	19	5	0.508	14.88	85.12	0	0	BASENJISCAFF0585	BASENJISCAFF0833	95.61	1443.15	KEEP	0	0	257	732.083	176570	225459	0.51935	80.1973	0	0	FALSE	FALSE	-1	-1	0	0	0	0	0	0	BASPBJ0262_pilon (Unplaced) Diploidocus:PRIMARY	PURE|HAP|REPT|NON|REP|NONE	GOOD|EXS|REPT|TOP|REP|NONE	WEAK|EXS|REPT|TOP|REP|NONE	HPURGE	PRIMARY	PRIMARY	quarantine	2
BASENJISCAFF0190	2996	56	55.9533	100	2996	57	64	0.5037	1.936	24.17	34.28	39.62	BASENJISCAFF0284	BASENJISCAFF1053	88.85	607.38	KEEP	1	5	701	1095.52	319844	304236	0.52236	94.1077	0	0	FALSE	FALSE	-1	-1	0	0	0	0	0	0	BASPBJ0263_pilon (Unplaced) Diploidocus:PRIMARY|PRIMARY|PRIMARY|PRIMARY|PRIMARY|PRIMARY	WEAK|EXS|REPT|TOP|REP|NONE	GOOD|EXS|HOMO|TOP|REP|NONE	GOOD|EXS|REPT|TOP|REP|NONE	PRIMARY	PRIMARY	PRIMARY	keep	7
BASENJISCAFF0191	16207	70	71.9155	100	16207	89	199	0.5437	0.364	0.062	44.68	54.89	BASENJICHR35.02	BASENJICHR1.02	99.19	765.98	REPEAT	0	0	1	33.9858	0	6485.42	0.54952	35.0905	0	0	FALSE	FALSE	-1	-1	0	0	0	0	0	0	BASPBJ0264_pilon (Unplaced) Diploidocus:PRIMARY|PRIMARY|PRIMARY|PRIMARY|PRIMARY|PRIMARY	GOOD|EXS|REPT|NON|PRI|NONE	GOOD|EXS|REPT|TOP|REP|NONE	WEAK|DIP|REPT|TOP|REP|NONE	PRIMARY	PRIMARY	PRIMARY	keep	7
BASENJISCAFF0192	1141	23	21.3006	100	1141	26	2	0.5068	0	81.51	18.49	0	BASENJISCAFF0585	BASENJISCAFF0175	86.85	367.31	KEEP	0	1	21	717.626	869	176112	0.51271	71.5695	0	0	FALSE	FALSE	-1	-1	0	0	0	0	0	0	BASPBJ0266_pilon (Unplaced)	PURE|HAP|REPT|SEC|REP|NONE	WEAK|DIP|REPT|TOP|REP|NONE	GOOD|EXS|PART|SEC|REP|NONE	HPURGE	PRIMARY	PRIMARY	quarantine	1
BASENJISCAFF0193	769	1	0.7919	79.1938	609	1	0	0.5353	100	0	0	0	-	-	0	0	JUNK	0	0	1	1.10498	0	60.6622	0.55527	13.3244	0	0	FALSE	FALSE	-1	-1	0	0	0	0	0	0	BASPBJ0267_pilon (Unplaced)	LOWX|LOW|UNIQ|NON|PRI|NONE	-	-	LOWCOV	-	-	junk	1
BASENJISCAFF0194	3347	1	1.2094	99.9402	3345	3	0	0.4017	100	0	0	0	-	-	0	0	JUNK	0	0	1	22.5411	0	810.666	0.37466	25.956	0	0	FALSE	FALSE	-1	-1	0	0	0	0	0	0	BASPBJ0268_pilon (Unplaced)	LOWX|LOW|UNIQ|NON|PRI|NONE	-	-	LOWCOV	-	-	junk	1
BASENJISCAFF0195	1370	20	17.4518	100	1370	14	10	0.557	0.365	99.64	0	0	BASENJISCAFF0087	BASENJICHR35.02	57.52	86.57	KEEP	0	0	1	1324.33	138	44300.1	0.55328	65.1786	0	0	FALSE	FALSE	-1	-1	0	0	0	0	0	0	BASPBJ0269_pilon (Unplaced)	PURE|HAP|HOMO|NON|PRI|NONE	GOOD|EXS|REPT|TOP|REP|NONE	GOOD|EXS|REPT|TOP|REP|NONE	HPURGE	PRIMARY	PRIMARY	quarantine	1
BASENJISCAFF0196	3934	121	118.13	100	3934	122	106	0.5003	0	0.025	1.093	98.88	-	-	0	0	JUNK	0	0	20	1988.51	4723	74467	0.52339	96.0338	0	0	FALSE	FALSE	-1	-1	0	0	0	0	0	0	BASPBJ0270_pilon (Unplaced) Diploidocus:COLLAPSED|COLLAPSED|COLLAPSED|COLLAPSED|COLLAPSED|COLLAPSED	PURE|EXS|UNIQ|NON|REP|NONE	-	-	COLLAPSED	-	-	repeat	7
BASENJISCAFF0197	928	5	4.8125	100	928	7	1	0.5499	100	0	0	0	-	-	0	0	JUNK	0	0	1	5.65188	0	763.37	0.56358	18.7361	0	0	FALSE	FALSE	-1	-1	0	0	0	0	0	0	BASPBJ0271_pilon (Unplaced)	PURE|LOW|UNIQ|NON|PRI|NONE	-	-	HPURGE	-	-	quarantine	1
BASENJISCAFF0198	7387	265	235.565	100	7387	256	320	0.5496	0.027	0.014	21.44	78.52	BASENJICHR35.02	BASENJICHR1.02	82.74	617.49	KEEP	0	1	5	136.903	2925	25695.7	0.57344	95.0822	0	0	FALSE	FALSE	-1	-1	0	0	0	0	0	0	BASPBJ0273_pilon (Unplaced) Diploidocus:PRIMARY|PRIMARY|PRIMARY|PRIMARY|PRIMARY|PRIMARY	GOOD|EXS|REPT|SEC|REP|NONE	GOOD|EXS|REPT|TOP|REP|NONE	WEAK|DIP|REPT|TOP|REP|NONE	PRIMARY	PRIMARY	PRIMARY	keep	7
BASENJISCAFF0199	14392	784	661.78	99.7846	14361	962	1097	0.5476	0.382	0.02794	1.133	98.46	-	-	0	0	JUNK	0	0	4	510.409	2261	31574.7	0.56955	84.338	0	0	FALSE	FALSE	-1	-1	0	0	0	0	0	0	BASPBJ0275_pilon (Unplaced) Diploidocus:COLLAPSED|COLLAPSED|COLLAPSED|COLLAPSED|COLLAPSED|COLLAPSED	PURE|EXS|UNIQ|NON|REP|NONE	-	-	COLLAPSED	-	-	repeat	7
BASENJISCAFF0200	1892	18	20.4482	100	1892	17	25	0.5492	6.977	55.97	37.05	0	BASENJICHR35.02	BASENJISCAFF0700	91.12	393.71	KEEP	0	0	2	88.8864	1431	17851.7	0.56342	94.7481	0	0	FALSE	FALSE	-1	-1	0	0	0	0	0	0	BASPBJ0276_pilon (Unplaced) Diploidocus:PRIMARY|PRIMARY|PRIMARY|PRIMARY|PRIMARY|PRIMARY	GOOD|HAP|REPT|NON|ALT|NONE	GOOD|EXS|REPT|TOP|REP|NONE	GOOD|DIP|REPT|TOP|PRI|NONE	PRIMARY	PRIMARY	PRIMARY	keep	7
BASENJISCAFF0201	7568	87	88.8747	100	7568	117	148	0.5443	0	0.04	42.09	57.88	BASENJICHR35.02	BASENJICHR1.02	98.28	798.26	REPEAT	0	0	8	136.582	3311	25272.6	0.57122	99.642	0	0	FALSE	FALSE	-1	-1	0	0	0	0	0	0	BASPBJ0279_pilon (Unplaced) Diploidocus:COLLAPSED|PRIMARY|PRIMARY|PRIMARY|PRIMARY|PRIMARY	GOOD|EXS|REPT|NON|REP|NONE	GOOD|EXS|REPT|TOP|REP|NONE	WEAK|DIP|REPT|TOP|REP|NONE	PRIMARY	PRIMARY	PRIMARY	keep	7
BASENJISCAFF0202	1167	26	24.9477	100	1167	0	40	0.5073	0.171	48.07	51.76	0	BASENJISCAFF0693	BASENJISCAFF1029	45.16	57.67	KEEP	0	0	466	733.649	208884	225020	0.51757	71.8668	0	0	FALSE	FALSE	-1	-1	0	0	0	0	0	0	BASPBJ0280_pilon (Unplaced) Diploidocus:PRIMARY|PRIMARY|PRIMARY|PRIMARY|PRIMARY|PRIMARY	GOOD|DIP|PART|NON|REP|NONE	WEAK|EXS|REPT|TOP|REP|NONE	PURE|DIP|UNIQ|SEC|REP|NONE	PRIMARY	PRIMARY	PRIMARY	keep	7
BASENJISCAFF0203	2686	58	53.3273	100	2686	50	47	0.5566	0	10.46	62.14	27.4	BASENJISCAFF1056	BASENJICHR35.02	82.54	287.79	KEEP	0	1	5	140.325	1916	23613.4	0.57446	86.8421	0	0	FALSE	FALSE	-1	-1	0	0	0	0	0	0	BASPBJ0281_pilon (Unplaced) Diploidocus:PRIMARY|PRIMARY|PRIMARY|PRIMARY|PRIMARY|PRIMARY	GOOD|DIP|REPT|SEC|REP|NONE	GOOD|DIP|HOMO|TOP|PRI|NONE	GOOD|EXS|REPT|TOP|REP|NONE	PRIMARY	PRIMARY	PRIMARY	keep	7
BASENJISCAFF0204	4131	127	129.267	100	4131	176	171	0.5472	0	0.218	29.12	70.66	BASENJICHR35.02	BASENJICHR1.02	97.99	734.76	REPEAT	0	0	11	145.3	5058	27838.9	0.56911	100	0	0	FALSE	FALSE	-1	-1	0	0	0	0	0	0	BASPBJ0282_pilon (Unplaced) Diploidocus:PRIMARY|PRIMARY|PRIMARY|PRIMARY|PRIMARY|PRIMARY	GOOD|EXS|REPT|NON|REP|NONE	GOOD|EXS|REPT|TOP|REP|NONE	WEAK|DIP|REPT|TOP|REP|NONE	PRIMARY	PRIMARY	PRIMARY	keep	7
BASENJISCAFF0205	9084	2	17.9607	99.8349	9069	56	58	0.5494	78.39	0	4.073	17.54	-	-	0	0	JUNK	0	0	1	21.6634	0	4086.35	0.54447	29.4546	0	0	FALSE	FALSE	-1	-1	0	0	0	0	0	0	BASPBJ0283_pilon (Unplaced)	LOWX|LOW|UNIQ|NON|PRI|NONE	-	-	LOWCOV	-	-	junk	1
BASENJISCAFF0206	642	1	1	100	642	1	0	0.2994	100	0	0	0	-	-	0	0	JUNK	0	0	1	2.41071	0	66	0.29907	15.5844	0	0	FALSE	FALSE	-1	-1	0	0	0	0	0	0	BASPBJ0284_pilon (Unplaced)	LOWX|LOW|UNIQ|NON|PRI|NONE	-	-	LOWCOV	-	-	junk	1
BASENJISCAFF0207	75412	102	110.975	100	75412	489	568	0.5065	0	1.944	29.68	68.38	BASENJISCAFF0325	BASENJISCAFF0162	98.83	579.7	REPEAT	0	0	1739	1892.31	205226	256100	0.51105	99.5463	0	0	FALSE	FALSE	-1	-1	0	0	0	0	0	0	BASPBJ0285_pilon (Unplaced) Diploidocus:PRIMARY|PRIMARY|PRIMARY|PRIMARY|PRIMARY|PRIMARY	GOOD|EXS|REPT|NON|REP|NONE	GOOD|EXS|REPT|TOP|REP|NONE	PURE|DIP|UNIQ|SEC|REP|NONE	PRIMARY	PRIMARY	PRIMARY	keep	7
BASENJISCAFF0208	5931	16	11.9457	73.3772	4352	11	13	0.3768	27.75	72.25	0	0	BASENJICHR35.02	BASENJICHR38.01	63.99	1847.55	KEEP	0	0	1	1947.3	50	62565.6	0.36031	67.1126	0	0	FALSE	FALSE	-1	-1	0	0	0	0	0	0	BASPBJ0287_pilon (Unplaced)	GOOD|HAP|REPT|NON|PRI|NONE	GOOD|EXS|REPT|TOP|REP|NONE	PURE|DIP|UNIQ|TOP|PRI|COMP	HPURGE	PRIMARY	PRIMARY	quarantine	1
BASENJISCAFF0209	646	1	1	100	646	0	1	0.4693	100	0	0	0	-	-	0	0	JUNK	0	0	1	44.6	0	4669.66	0.47678	24.0323	0	0	FALSE	FALSE	-1	-1	0	0	0	0	0	0	BASPBJ0288_pilon (Unplaced)	LOWX|LOW|UNIQ|NON|PRI|NONE	-	-	LOWCOV	-	-	junk	1
BASENJISCAFF0210	5548	140	143.308	99.9459	5545	182	181	0.549	0.27	0	6.345	93.39	-	-	0	0	JUNK	0	0	2	62.4448	1151	11195.7	0.56417	73.5422	0	0	FALSE	FALSE	-1	-1	0	0	0	0	0	0	BASPBJ0289_pilon (Unplaced) Diploidocus:COLLAPSED|COLLAPSED|COLLAPSED|COLLAPSED|COLLAPSED|COLLAPSED	PURE|EXS|UNIQ|NON|ALT|NONE	-	-	COLLAPSED	-	-	repeat	7
BASENJISCAFF0211	1421	19	18.2956	100	1421	21	7	0.5047	2.885	95.64	1.478	0	BASENJISCAFF0585	BASENJISCAFF0869	12.39	27.38	KEEP	0	0	454	990.223	250563	263562	0.51372	80.8602	0	0	FALSE	FALSE	-1	-1	0	0	0	0	0	0	BASPBJ0290_pilon (Unplaced)	PURE|HAP|PART|NON|REP|NONE	WEAK|DIP|REPT|TOP|REP|NONE	PURE|DIP|UNIQ|SEC|REP|NONE	HPURGE	PRIMARY	PRIMARY	quarantine	1
BASENJISCAFF0212	3729	8	8.2186	100	3729	8	10	0.5461	42.67	57.33	0	0	BASENJICHR35.02	BASENJISCAFF0513	88.31	241.03	KEEP	0	0	2	96.8026	495	16250	0.5602	79.071	0	0	FALSE	FALSE	-1	-1	0	0	0	0	0	0	BASPBJ0291_pilon (Unplaced)	GOOD|HAP|HOMO|NON|ALT|NONE	GOOD|EXS|REPT|TOP|REP|NONE	GOOD|EXS|REPT|TOP|REP|NONE	HPURGE	PRIMARY	COLLAPSED	quarantine	1
BASENJISCAFF0213	171	0	0	0	0	0	0	0	100	0	0	0	-	-	0	0	KEEP	0	0	1	46.1517	0	1938.69	0.38012	27.5862	0	0	FALSE	FALSE	-1	-1	0	0	0	0	0	0	BASPBJ0293_pilon (Unplaced)	LOWX|LOW|UNIQ|NON|PRI|NONE	-	-	LOWCOV	-	-	junk	1
BASENJISCAFF0214	518	21	20.0019	100	518	21	4	0.5134	0	100	0	0	BASENJISCAFF0710	BASENJISCAFF0585	96.53	927.8	KEEP	0	0	31	499.701	1985	167900	0.51737	80.2845	0	0	FALSE	FALSE	-1	-1	0	0	0	0	0	0	BASPBJ0294_pilon (Unplaced) Diploidocus:PRIMARY	PURE|HAP|REPT|NON|REP|NONE	GOOD|DIP|REPT|TOP|REP|NONE	GOOD|EXS|REPT|TOP|REP|NONE	HPURGE	PRIMARY	PRIMARY	quarantine	2
BASENJISCAFF0215	3490	32	32.567	100	3490	7	61	0.5036	0.831	29.14	70.03	0	BASENJISCAFF0473	BASENJISCAFF0284	97.56	4185.87	KEEP	0	0	721	1085.55	321693	325540	0.51433	96.1028	0	0	FALSE	FALSE	-1	-1	0	0	0	0	0	0	BASPBJ0295_pilon (Unplaced) Diploidocus:PRIMARY|PRIMARY|PRIMARY|PRIMARY|PRIMARY|PRIMARY	GOOD|DIP|REPT|NON|REP|NONE	GOOD|EXS|REPT|TOP|REP|NONE	GOOD|EXS|HOMO|TOP|REP|NONE	PRIMARY	PRIMARY	PRIMARY	keep	7
BASENJISCAFF0216	4307	72	68.2489	99.8143	4299	65	76	0.5518	0.3015	0.2555	40.63	58.81	BASENJISCAFF0240	BASENJISCAFF0450	47.16	63.11	KEEP	1	0	3	91.7898	905	15979.6	0.56466	93.5996	0	0	FALSE	FALSE	-1	-1	0	0	0	0	0	0	BASPBJ0296_pilon (Unplaced) Diploidocus:PRIMARY|PRIMARY|PRIMARY|PRIMARY|PRIMARY|PRIMARY	GOOD|EXS|PART|TOP|REP|NONE	WEAK|LOW|HOMO|TOP|PRI|NONE	GOOD|HAP|HOMO|SEC|PRI|NONE	PRIMARY	PRIMARY	PRIMARY	keep	7
BASENJISCAFF0217	942	23	20.8811	100	942	18	12	0.563	3.185	80.15	16.67	0	BASENJISCAFF0686	BASENJICHR1.02	65.82	163.48	KEEP	1	0	5	77.917	1917	14022	0.57643	86.5721	0	0	FALSE	FALSE	-1	-1	0	0	0	0	0	0	BASPBJ0297_pilon (Unplaced)	PURE|HAP|HOMO|TOP|REP|NONE	GOOD|EXS|HOMO|TOP|REP|NONE	GOOD|DIP|REPT|TOP|REP|NONE	HPURGE	PRIMARY	PRIMARY	quarantine	1
BASENJISCAFF0218	4765	71	63.0894	100	4765	8	139	0.5121	0.084	10.79	36.22	52.91	BASENJISCAFF0473	BASENJISCAFF0269	98.03	5947.76	REPEAT	0	0	25	1147.25	1161	153690	0.52382	73.0534	0	0	FALSE	FALSE	-1	-1	0	0	0	0	0	0	BASPBJ0299_pilon (Unplaced) Diploidocus:PRIMARY|PRIMARY|PRIMARY|PRIMARY|PRIMARY|PRIMARY	GOOD|EXS|REPT|NON|REP|NONE	GOOD|EXS|REPT|TOP|REP|NONE	WEAK|EXS|REPT|TOP|REP|NONE	PRIMARY	PRIMARY	PRIMARY	keep	7
BASENJISCAFF0219	8241	535	495.572	99.8423	8228	600	459	0.5502	6.783	0.04892	0.04892	93.12	-	-	0	0	JUNK	0	0	17	162.229	7949	30508.4	0.57372	91.7103	0	0	FALSE	FALSE	-1	-1	0	0	0	0	0	0	BASPBJ0300_pilon (Unplaced) Diploidocus:COLLAPSED|COLLAPSED|COLLAPSED|COLLAPSED|COLLAPSED|COLLAPSED	PURE|EXS|UNIQ|NON|REP|NONE	-	-	COLLAPSED	-	-	repeat	7
BASENJISCAFF0220	478	4	3.3766	100	478	1	3	0.5089	100	0	0	0	-	-	0	0	JUNK	0	0	1	211.091	0	34831.1	0.51255	23.0088	0	0	FALSE	FALSE	-1	-1	0	0	0	0	0	0	BASPBJ0301_pilon (Unplaced)	PURE|LOW|UNIQ|NON|PRI|NONE	-	-	LOWQUAL	-	-	quarantine	1
BASENJISCAFF0221	22214	1280	1087.7	100	22214	17	2343	0.5102	0	0	0	100	-	-	0	0	JUNK	0	0	19	1115.94	845	152412	0.5221	64.9315	0	0	FALSE	FALSE	-1	-1	0	0	0	0	0	0	BASPBJ0302_pilon (Unplaced) Diploidocus:COLLAPSED|COLLAPSED|COLLAPSED|COLLAPSED|COLLAPSED|COLLAPSED	PURE|EXS|UNIQ|NON|REP|NONE	-	-	COLLAPSED	-	-	repeat	7
BASENJISCAFF0222	3187	10	9.3386	100	3187	2	21	0.5095	23.47	76.53	0	0	BASENJISCAFF0833	BASENJISCAFF0748	78.19	622.12	KEEP	0	0	851	1260.61	330078	323691	0.51428	92.6606	0	0	FALSE	FALSE	-1	-1	0	0	0	0	0	0	BASPBJ0303_pilon (Unplaced)	GOOD|HAP|REPT|NON|REP|NONE	WEAK|DIP|REPT|TOP|REP|NONE	WEAK|LOW|REPT|TOP|REP|NONE	HPURGE	PRIMARY	PRIMARY	quarantine	1
BASENJISCAFF0223	1902	3	3.1288	99.8948	1900	2	4	0.3892	100	0	0	0	-	-	0	0	JUNK	0	0	1	133.112	0	4220.24	0.40536	30.2239	0	0	FALSE	FALSE	-1	-1	0	0	0	0	0	0	BASPBJ0305_pilon (Unplaced)	PURE|LOW|UNIQ|NON|PRI|NONE	-	-	HPURGE	-	-	quarantine	1
BASENJISCAFF0224	1870	2	3.4658	62.139	1162	5	8	0.4477	80.59	19.41	0	0	BASENJICHR31.01	BASENJICHR10.01	96.84	738.4	REPEAT	0	0	1	2.75217	40	971.472	0.54759	58.731	0	0	FALSE	FALSE	-1	-1	0	0	0	0	0	0	BASPBJ0306_pilon (Unplaced)	LOWX|LOW|REPT|NON|PRI|NONE	PURE|DIP|UNIQ|TOP|PRI|COMP	PURE|DIP|UNIQ|TOP|PRI|COMP|+VEC	LOWCOV	PRIMARY	PRIMARY	junk	1
BASENJISCAFF0225	2326	39	35.8792	100	2326	68	0	0.5074	0.043	23.26	76.7	0	BASENJISCAFF0664	BASENJISCAFF0299	95.27	457.35	REPEAT	0	0	1730	1807.69	199578	245943	0.51161	88.7826	0	0	FALSE	FALSE	-1	-1	0	0	0	0	0	0	BASPBJ0307_pilon (Unplaced) Diploidocus:PRIMARY|PRIMARY|PRIMARY|PRIMARY|PRIMARY|PRIMARY	GOOD|DIP|REPT|NON|REP|NONE	GOOD|HAP|REPT|TOP|REP|NONE	GOOD|EXS|REPT|TOP|REP|NONE	PRIMARY	PRIMARY	PRIMARY	keep	7
BASENJISCAFF0226	2400	123	109.315	99.5833	2390	96	94	0.5588	11.87	2.459	1.25	84.42	-	-	0	0	JUNK	0	0	6	103.112	2744	19578.3	0.57708	83.4457	0	0	FALSE	FALSE	-1	-1	0	0	0	0	0	0	BASPBJ0311_pilon (Unplaced) Diploidocus:COLLAPSED|COLLAPSED|COLLAPSED|COLLAPSED|COLLAPSED|COLLAPSED	PURE|EXS|UNIQ|NON|REP|NONE	-	-	COLLAPSED	-	-	repeat	7
BASENJISCAFF0227	1653	17	15.3835	99.879	1651	19	8	0.5084	15.37	84.63	0	0	BASENJISCAFF0585	BASENJISCAFF0634	97.82	1248.94	REPEAT	0	0	831	1194.75	302836	306916	0.51785	89.5513	0	0	FALSE	FALSE	-1	-1	0	0	0	0	0	0	BASPBJ0312_pilon (Unplaced)	PURE|HAP|REPT|NON|REP|NONE	WEAK|DIP|REPT|TOP|REP|NONE	PURE|DIP|UNIQ|TOP|REP|NONE	HPURGE	PRIMARY	PRIMARY	quarantine	1
BASENJISCAFF0228	4758	135	125.844	100	4758	89	144	0.5495	0	0	3.657	96.34	-	-	0	0	JUNK	0	0	13	147.874	4717	27210.8	0.57377	99.4928	0	0	FALSE	FALSE	-1	-1	0	0	0	0	0	0	BASPBJ0313_pilon (Unplaced) Diploidocus:COLLAPSED|COLLAPSED|COLLAPSED|COLLAPSED|COLLAPSED|COLLAPSED	PURE|EXS|UNIQ|NON|REP|NONE	-	-	COLLAPSED	-	-	repeat	7
BASENJISCAFF0229	834	16	14.9341	100	834	13	10	0.5463	4.916	95.08	0	0	BASENJISCAFF0997	BASENJISCAFF0666	98.08	340.29	KEEP	0	0	3	82.7698	1634	17629.8	0.56835	100	0	0	FALSE	FALSE	-1	-1	0	0	0	0	0	0	BASPBJ0315_pilon (Unplaced)	PURE|HAP|REPT|NON|REP|NONE	GOOD|EXS|REPT|TOP|PRI|NONE	GOOD|EXS|REPT|SEC|REP|NONE	HPURGE	PRIMARY	PRIMARY	quarantine	1
BASENJISCAFF0230	3293	1	1.758	99.9696	3292	5	0	0.5104	100	0	0	0	-	-	0	0	JUNK	0	0	1	9.91613	0	320.736	0.40632	22.161	0	0	FALSE	FALSE	-1	-1	0	0	0	0	0	0	BASPBJ0316_pilon (Unplaced)	LOWX|LOW|UNIQ|NON|PRI|NONE	-	-	LOWCOV	-	-	junk	1
BASENJISCAFF0231	1926	6	5.8479	100	1926	12	0	0.5107	81.93	18.07	0	0	-	-	0	0	JUNK	0	0	1	161.034	0	25531.8	0.53011	24.1579	0	0	FALSE	FALSE	-1	-1	0	0	0	0	0	0	BASPBJ0317_pilon (Unplaced)	PURE|LOW|UNIQ|NON|PRI|NONE	-	-	HPURGE	-	-	quarantine	1
BASENJISCAFF0232	446	0	0	0	0	0	0	0	100	0	0	0	-	-	0	0	KEEP	0	0	1	1.03333	0	1.26667	0.33408	3.33333	0	0	FALSE	FALSE	-1	-1	0	0	0	0	0	0	BASPBJ0318_pilon (Unplaced)	LOWX|LOW|UNIQ|NON|PRI|NONE	-	-	LOWCOV	-	-	junk	1
BASENJISCAFF0233	1188	27	26.5446	100	1188	20	23	0.5433	0	46.89	53.11	0	BASENJISCAFF0788	BASENJISCAFF0658	54.38	102.53	KEEP	0	0	5	102.365	2319	18305.1	0.55724	97.6764	0	0	FALSE	FALSE	-1	-1	0	0	0	0	0	0	BASPBJ0319_pilon (Unplaced) Diploidocus:PRIMARY|PRIMARY|PRIMARY|PRIMARY|PRIMARY|PRIMARY	GOOD|DIP|HOMO|NON|REP|NONE	PURE|DIP|UNIQ|TOP|REP|NONE	PURE|DIP|UNIQ|SEC|REP|NONE	PRIMARY	PRIMARY	PRIMARY	keep	7
BASENJISCAFF0234	35924	39	38.5251	100	35924	95	85	0.5083	1.539	13.54	84.92	0	-	-	0	0	KEEP	0	0	1831	2145.37	212630	276209	0.51233	98.6991	0	0	FALSE	FALSE	-1	-1	0	0	0	0	0	0	BASPBJ0321_pilon (Unplaced) Diploidocus:PRIMARY|PRIMARY|PRIMARY|PRIMARY|PRIMARY|PRIMARY	PURE|DIP|UNIQ|NON|REP|NONE	-	-	PRIMARY	-	-	keep	7
BASENJISCAFF0235	476	17	14.6534	100	476	11	9	0.5694	2.101	97.9	0	0	BASENJICHR35.02	BASENJISCAFF0479	50.21	168.91	KEEP	0	0	2	50.7089	1385	7437.3	0.56513	92.8889	0	0	FALSE	FALSE	-1	-1	0	0	0	0	0	0	BASPBJ0322_pilon (Unplaced)	PURE|HAP|HOMO|NON|ALT|NONE	GOOD|EXS|REPT|TOP|REP|NONE	PURE|DIP|UNIQ|SEC|REP|NONE	LOWQUAL	PRIMARY	PRIMARY	quarantine	1
BASENJISCAFF0236	7985	171	164.462	99.9624	7982	209	173	0.5496	0.3754	0.1749	1.153	98.3	-	-	0	0	JUNK	0	0	4	122.735	1655	21989.3	0.56744	97.8138	0	0	FALSE	FALSE	-1	-1	0	0	0	0	0	0	BASPBJ0323_pilon (Unplaced) Diploidocus:COLLAPSED|COLLAPSED|COLLAPSED|COLLAPSED|COLLAPSED|COLLAPSED	PURE|EXS|UNIQ|NON|REP|NONE	-	-	COLLAPSED	-	-	repeat	7
BASENJISCAFF0237	3881	34	34.7807	100	3881	28	46	0.5147	0	26.05	73.95	0	BASENJISCAFF0135	BASENJISCAFF0884	86.83	534.04	KEEP	0	0	1912	2164.2	223063	296505	0.51971	99.2737	0	0	FALSE	FALSE	-1	-1	0	0	0	0	0	0	BASPBJ0324_pilon (Unplaced) Diploidocus:PRIMARY|PRIMARY|PRIMARY|PRIMARY|PRIMARY|PRIMARY	GOOD|DIP|REPT|NON|REP|NONE	WEAK|HAP|REPT|TOP|REP|NONE	GOOD|EXS|REPT|TOP|REP|NONE	PRIMARY	KEEP	PRIMARY	keep	7
BASENJISCAFF0238	915	1	1.4295	100	915	2	1	0.543	100	0	0	0	-	-	0	0	JUNK	0	0	1	15.1204	0	3012.52	0.55519	22.7222	0	0	FALSE	FALSE	-1	-1	0	0	0	0	0	0	BASPBJ0325_pilon (Unplaced)	LOWX|LOW|UNIQ|NON|PRI|NONE	-	-	LOWCOV	-	-	junk	1
BASENJISCAFF0239	1817	1	1.2124	100	1817	1	1	0.3586	100	0	0	0	-	-	0	0	JUNK	0	0	1	1675.47	0	29327.6	0.36709	36.1251	0	0	FALSE	FALSE	-1	-1	0	0	0	0	0	0	BASPBJ0326_pilon (Unplaced)	LOWX|LOW|UNIQ|NON|PRI|NONE	-	-	LOWCOV	-	-	junk	1
BASENJISCAFF0240	2513	23	17.3366	99.1246	2491	25	20	0.5565	43.06	20.21	36.73	0	BASENJISCAFF0216	BASENJISCAFF0450	81.54	102.31	KEEP	1	0	1	53.9477	26	9896.98	0.56825	53.84	0	0	FALSE	FALSE	-1	-1	0	0	0	0	0	0	BASPBJ0329_pilon (Unplaced) Diploidocus:PRIMARY|PRIMARY|PRIMARY|PRIMARY|PRIMARY|PRIMARY	WEAK|LOW|HOMO|TOP|PRI|NONE	GOOD|EXS|PART|TOP|REP|NONE	GOOD|HAP|HOMO|SEC|PRI|NONE	PRIMARY	PRIMARY	PRIMARY	keep	7
BASENJISCAFF0241	5733	13	12.9063	100	5733	17	15	0.5103	1.116	98.88	0	0	BASENJISCAFF0299	BASENJISCAFF0473	93.09	1273.03	KEEP	0	0	2035	2204.08	217738	276241	0.51561	96.2152	0	0	FALSE	FALSE	-1	-1	0	0	0	0	0	0	BASPBJ0330_pilon (Unplaced)	PURE|HAP|REPT|NON|REP|NONE	GOOD|EXS|REPT|TOP|REP|NONE	GOOD|EXS|REPT|TOP|REP|NONE	HPURGE	COLLAPSED	PRIMARY	quarantine	1
BASENJISCAFF0242	2194	8	7.9499	96.8095	2124	14	0	0.5068	35.82	64.18	0	0	BASENJISCAFF0585	BASENJISCAFF0634	77.89	184	KEEP	0	2	874	1242.1	336174	328438	0.51367	94.2804	0	0	FALSE	FALSE	-1	-1	0	0	0	0	0	0	BASPBJ0331_pilon (Unplaced)	GOOD|HAP|HOMO|SEC|REP|NONE	WEAK|DIP|REPT|TOP|REP|NONE	PURE|DIP|UNIQ|TOP|REP|NONE	HPURGE	PRIMARY	PRIMARY	quarantine	1
BASENJISCAFF0243	1112	10	8.8534	100	1112	1	11	0.5026	22.66	77.34	0	0	BASENJISCAFF0833	BASENJISCAFF0612	38.85	63.04	KEEP	0	0	1	519.956	6	118112	0.4982	54.3278	0	0	FALSE	FALSE	-1	-1	0	0	0	0	0	0	BASPBJ0332_pilon (Unplaced)	GOOD|HAP|PART|NON|PRI|NONE	WEAK|DIP|REPT|TOP|REP|NONE	GOOD|DIP|HOMO|SEC|REP|NONE	HPURGE	PRIMARY	PRIMARY	quarantine	1
BASENJISCAFF0244	1179	3	3.0475	100	1179	4	1	0.5416	100	0	0	0	-	-	0	0	JUNK	0	0	1	8.43539	0	1196.42	0.55895	19.6878	0	0	FALSE	FALSE	-1	-1	0	0	0	0	0	0	BASPBJ0333_pilon (Unplaced)	PURE|LOW|UNIQ|NON|PRI|NONE	-	-	HPURGE	-	-	quarantine	1
BASENJISCAFF0245	1143	2	2.2957	100	1143	1	3	0.5648	100	0	0	0	-	-	0	0	JUNK	0	0	1	10.3778	0	1473.32	0.56518	27.7529	0	0	FALSE	FALSE	-1	-1	0	0	0	0	0	0	BASPBJ0334_pilon (Unplaced)	LOWX|LOW|UNIQ|NON|PRI|NONE	-	-	LOWCOV	-	-	junk	1
BASENJISCAFF0246	67902	268	281.554	100	67902	651	883	0.5085	0	2.053	8.741	89.21	-	-	0	0	JUNK	0	0	2219	2349.03	269525	330806	0.51601	98.2483	0	0	FALSE	FALSE	-1	-1	0	0	0	0	0	0	BASPBJ0335_pilon (Unplaced) Diploidocus:COLLAPSED|COLLAPSED|COLLAPSED|COLLAPSED|COLLAPSED|COLLAPSED	PURE|EXS|UNIQ|NON|REP|NONE	-	-	COLLAPSED	-	-	repeat	7
BASENJISCAFF0247	486	6	5.9835	99.3827	483	9	0	0.4318	72.43	27.57	0	0	-	-	0	0	KEEP	0	0	5	1729.59	55	60997.4	0.44444	61.5217	0	0	FALSE	FALSE	-1	-1	0	0	0	0	0	0	BASPBJ0336_pilon (Unplaced)	GOOD|LOW|UNIQ|NON|REP|NONE	-	-	LOWQUAL	-	-	quarantine	1
BASENJISCAFF0248	3268	56	54.5532	100	3268	53	53	0.5482	6.059	17.23	37.24	39.47	BASENJICHR19.01	BASENJICHR8.01	97	815.67	REPEAT	0	0	1	2.37138	0	862.155	0.58599	40.0987	0	0	FALSE	FALSE	-1	-1	0	0	0	0	0	0	BASPBJ0338_pilon (Unplaced) Diploidocus:PRIMARY|PRIMARY|PRIMARY|PRIMARY|PRIMARY|PRIMARY	WEAK|EXS|REPT|NON|PRI|NONE	PURE|DIP|UNIQ|TOP|PRI|COMP	PURE|DIP|UNIQ|TOP|PRI|COMP|+VEC	PRIMARY	PRIMARY	PRIMARY	keep	7
BASENJISCAFF0249	4533	27	25.5467	99.9118	4529	32	38	0.5528	1.301	38.78	59.92	0	BASENJICHR35.02	BASENJICHR1.02	96.58	584.09	KEEP	0	0	3	104.363	1150	19355.2	0.55945	90.9474	0	0	FALSE	FALSE	-1	-1	0	0	0	0	0	0	BASPBJ0339_pilon (Unplaced) Diploidocus:PRIMARY|PRIMARY|PRIMARY|PRIMARY|PRIMARY|PRIMARY	GOOD|DIP|REPT|NON|REP|NONE	GOOD|EXS|REPT|TOP|REP|NONE	WEAK|DIP|REPT|TOP|REP|NONE	PRIMARY	PRIMARY	PRIMARY	keep	7
BASENJISCAFF0250	762	1	1	100	762	1	0	0.5413	100	0	0	0	-	-	0	0	JUNK	0	0	1	3.46196	0	483.318	0.55643	18.6141	0	0	FALSE	FALSE	-1	-1	0	0	0	0	0	0	BASPBJ0342_pilon (Unplaced)	LOWX|LOW|UNIQ|NON|PRI|NONE	-	-	LOWCOV	-	-	junk	1
BASENJISCAFF0251	58360	49	48.1829	100	58360	149	191	0.5086	0.005	7.061	92.93	0	-	-	0	0	KEEP	0	2	1735	1829.78	204918	249151	0.5115	98.5874	0	0	FALSE	FALSE	-1	-1	0	0	0	0	0	0	BASPBJ0346_pilon (Unplaced) Diploidocus:PRIMARY|PRIMARY|PRIMARY|PRIMARY|PRIMARY|PRIMARY	PURE|DIP|UNIQ|SEC|REP|NONE	-	-	PRIMARY	-	-	keep	7
BASENJISCAFF0252	120084	74	80.799	100	120084	566	603	0.5061	0	0.263	40.29	59.44	BASENJISCAFF0715	BASENJICHR11.02	92.76	538.31	KEEP	0	1	1778	1972.94	207042	261799	0.5114	99.4586	0	0	FALSE	FALSE	-1	-1	0	0	0	0	0	0	BASPBJ0347_pilon (Unplaced) Diploidocus:PRIMARY|PRIMARY|PRIMARY|PRIMARY|PRIMARY|PRIMARY	GOOD|EXS|REPT|SEC|REP|NONE	PURE|DIP|UNIQ|TOP|REP|NONE	GOOD|DIP|REPT|TOP|REP|NONE	PRIMARY	PRIMARY	PRIMARY	keep	7
BASENJISCAFF0253	8016	7	8.9828	97.7919	7839	7	22	0.5118	52.47	47.53	0	0	BASENJISCAFF0299	BASENJISCAFF0251	97.48	865.53	REPEAT	0	0	1786	1868.27	190947	231461	0.51647	90.801	0	0	FALSE	FALSE	-1	-1	0	0	0	0	0	0	BASPBJ0348_pilon (Unplaced)	GOOD|LOW|REPT|NON|REP|NONE	GOOD|EXS|REPT|TOP|REP|NONE	PURE|DIP|UNIQ|TOP|REP|NONE	HPURGE	COLLAPSED	PRIMARY	quarantine	1
BASENJISCAFF0254	4096	8	7.2434	99.9756	4095	7	13	0.5009	45.09	54.91	0	0	BASENJISCAFF0473	BASENJISCAFF0269	98.41	311.23	REPEAT	0	0	1654	1629.03	176009	200232	0.51489	83.6609	0	0	FALSE	FALSE	-1	-1	0	0	0	0	0	0	BASPBJ0349_pilon (Unplaced)	GOOD|HAP|REPT|NON|REP|NONE	GOOD|EXS|REPT|TOP|REP|NONE	WEAK|EXS|REPT|TOP|REP|NONE	HPURGE	PRIMARY	PRIMARY	quarantine	1
BASENJISCAFF0255	3104	36	32.9391	100	3104	40	35	0.5538	10.12	35.37	54.51	0	BASENJICHR35.02	BASENJISCAFF1061	43.23	85.82	KEEP	0	1	2	82.3691	766	13575.7	0.57893	74.5939	0	0	FALSE	FALSE	-1	-1	0	0	0	0	0	0	BASPBJ0350_pilon (Unplaced) Diploidocus:PRIMARY|PRIMARY|PRIMARY|PRIMARY|PRIMARY|PRIMARY	GOOD|DIP|PART|SEC|ALT|NONE	GOOD|EXS|REPT|TOP|REP|NONE	GOOD|EXS|REPT|SEC|REP|NONE	PRIMARY	PRIMARY	COLLAPSED	keep	7
BASENJISCAFF0256	857	10	9.5403	100	857	6	9	0.5609	29.17	70.83	0	0	BASENJICHR35.02	BASENJISCAFF1063	69.54	209.8	KEEP	0	0	1	49.3827	340	8718.09	0.5741	80.0241	0	0	FALSE	FALSE	-1	-1	0	0	0	0	0	0	BASPBJ0351_pilon (Unplaced)	GOOD|HAP|HOMO|NON|PRI|NONE	GOOD|EXS|REPT|TOP|REP|NONE	PURE|DIP|UNIQ|SEC|REP|NONE	HPURGE	PRIMARY	PRIMARY	quarantine	1
BASENJISCAFF0257	3880	46	45.0155	99.7165	3869	60	71	0.5477	2.655	36.52	35.93	24.9	BASENJICHR35.02	BASENJICHR1.02	49.79	396.08	KEEP	0	1	1	50.3768	1	9461	0.54175	50.4411	0	0	FALSE	FALSE	-1	-1	0	0	0	0	0	0	BASPBJ0352_pilon (Unplaced) Diploidocus:PRIMARY|PRIMARY|PRIMARY|PRIMARY|PRIMARY|PRIMARY	WEAK|HAP|PART|SEC|PRI|NONE	GOOD|EXS|REPT|TOP|REP|NONE	WEAK|DIP|REPT|TOP|REP|NONE	PRIMARY	PRIMARY	PRIMARY	keep	7
BASENJISCAFF0258	1166	17	16.0815	100	1166	12	8	0.556	0.172	99.83	0	0	BASENJISCAFF0445	BASENJICHR35.02	44.25	66.38	KEEP	0	0	4	104.131	1387	16832.6	0.57033	96.8421	0	0	FALSE	FALSE	-1	-1	0	0	0	0	0	0	BASPBJ0353_pilon (Unplaced)	PURE|HAP|PART|NON|REP|NONE	GOOD|DIP|HOMO|TOP|REP|NONE	GOOD|EXS|REPT|TOP|REP|NONE	HPURGE	PRIMARY	PRIMARY	quarantine	1
BASENJISCAFF0259	771	26	24.7328	100	771	17	17	0.5517	0	49.94	50.07	0	BASENJICHR35.02	BASENJISCAFF1044	45.14	195.46	KEEP	0	0	1	56.4644	534	10967.4	0.56809	82.4161	0	0	FALSE	FALSE	-1	-1	0	0	0	0	0	0	BASPBJ0354_pilon (Unplaced) Diploidocus:PRIMARY|PRIMARY|PRIMARY|PRIMARY|PRIMARY|PRIMARY	GOOD|DIP|PART|NON|PRI|NONE	GOOD|EXS|REPT|TOP|REP|NONE	PURE|DIP|UNIQ|SEC|ALT|NONE	PRIMARY	PRIMARY	PRIMARY	keep	7
BASENJISCAFF0260	15234	37	54.0417	100	15234	33	249	0.5064	3.269	20.12	46.71	29.91	BASENJISCAFF0284	BASENJISCAFF0572	99.11	7092.87	REPEAT	0	0	719	1094.53	318344	313696	0.51208	94.3714	0	0	FALSE	FALSE	-1	-1	0	0	0	0	0	0	BASPBJ0358_pilon (Unplaced) Diploidocus:PRIMARY|PRIMARY|PRIMARY|PRIMARY|PRIMARY|PRIMARY	WEAK|DIP|REPT|NON|REP|NONE	GOOD|EXS|HOMO|TOP|REP|NONE	GOOD|DIP|REPT|TOP|REP|NONE	PRIMARY	PRIMARY	PRIMARY	keep	7
BASENJISCAFF0261	1221	5	4.9697	99.9181	1220	1	10	0.4113	83.21	16.79	0	0	-	-	0	0	JUNK	0	0	7	1116.16	82	51003.9	0.39394	61.3389	0	0	FALSE	FALSE	-1	-1	0	0	0	0	0	0	BASPBJ0359_pilon (Unplaced)	PURE|LOW|UNIQ|NON|REP|NONE	-	-	HPURGE	-	-	quarantine	1
BASENJISCAFF0262	1099	2	2.343	88.353	971	8	0	0.3988	100	0	0	0	-	-	0	0	JUNK	0	0	1	1586.2	0	55623.5	0.39217	46.4119	0	0	FALSE	FALSE	-1	-1	0	0	0	0	0	0	BASPBJ0360_pilon (Unplaced)	LOWX|LOW|UNIQ|NON|PRI|NONE	-	-	LOWCOV	-	-	junk	1
BASENJISCAFF0263	1684	25	23.1817	100	1684	20	24	0.5507	0.119	52.67	47.21	0	BASENJICHR35.02	BASENJISCAFF0489	99.52	224.35	HAPLOTIG	0	0	4	111.078	1747	21319.4	0.56354	100	0	0	FALSE	FALSE	-1	-1	0	0	0	0	0	0	BASPBJ0363_pilon (Unplaced) Diploidocus:PRIMARY|PRIMARY|PRIMARY|PRIMARY|PRIMARY|PRIMARY	GOOD|HAP|HOMO|NON|REP|NONE	GOOD|EXS|REPT|TOP|REP|NONE	PURE|DIP|UNIQ|SEC|REP|NONE	PRIMARY	PRIMARY	PRIMARY	keep	7
BASENJISCAFF0264	4970	25	24.1372	100	4970	70	4	0.5112	0	53.18	46.82	0	BASENJISCAFF0473	BASENJISCAFF0269	95.15	5201.59	REPEAT	0	0	36	1184.01	2622	161602	0.51368	80.2994	0	0	FALSE	FALSE	-1	-1	0	0	0	0	0	0	BASPBJ0365_pilon (Unplaced) Diploidocus:PRIMARY|PRIMARY|PRIMARY|PRIMARY|PRIMARY|PRIMARY	GOOD|HAP|REPT|NON|REP|NONE	GOOD|EXS|REPT|TOP|REP|NONE	WEAK|EXS|REPT|TOP|REP|NONE	PRIMARY	PRIMARY	PRIMARY	keep	7
BASENJISCAFF0265	1063	12	10.4421	100	1063	22	0	0.5383	29.07	70.93	0	0	BASENJICHR1.02	BASENJICHR29.01	87.21	241.11	KEEP	0	0	1	71.5853	0	11465.3	0.57197	46.6731	0	0	FALSE	FALSE	-1	-1	0	0	0	0	0	0	BASPBJ0366_pilon (Unplaced)	GOOD|HAP|HOMO|NON|PRI|NONE	GOOD|DIP|REPT|TOP|REP|NONE	PURE|DIP|UNIQ|TOP|PRI|COMP	HPURGE	PRIMARY	PRIMARY	quarantine	1
BASENJISCAFF0266	2162	25	24.8238	100	2162	0	46	0.5117	4.949	47.13	47.92	0	BASENJISCAFF0473	BASENJISCAFF0269	98.38	1786.77	REPEAT	0	0	30	1208.19	1224	166528	0.52035	72.0037	0	0	FALSE	FALSE	-1	-1	0	0	0	0	0	0	BASPBJ0367_pilon (Unplaced) Diploidocus:PRIMARY|PRIMARY|PRIMARY|PRIMARY|PRIMARY|PRIMARY	WEAK|DIP|REPT|NON|REP|NONE	GOOD|EXS|REPT|TOP|REP|NONE	WEAK|EXS|REPT|TOP|REP|NONE	PRIMARY	PRIMARY	PRIMARY	keep	7
BASENJISCAFF0267	4567	15	13.3451	100	4567	7	27	0.5082	2.606	97.39	0	0	BASENJISCAFF0299	BASENJISCAFF0664	96.15	578.8	REPEAT	0	0	1382	1650.44	166660	207306	0.50865	90.9271	0	0	FALSE	FALSE	-1	-1	0	0	0	0	0	0	BASPBJ0368_pilon (Unplaced)	PURE|HAP|REPT|NON|REP|NONE	GOOD|EXS|REPT|TOP|REP|NONE	GOOD|HAP|REPT|TOP|REP|NONE	HPURGE	COLLAPSED	PRIMARY	quarantine	1
BASENJISCAFF0268	28706	71	98.9805	100	28706	620	12	0.5112	0	0.324	46.84	52.84	BASENJISCAFF0473	BASENJISCAFF0269	98.81	9000.05	REPEAT	0	0	1656	1673.44	189856	232394	0.52306	82.4582	0	0	FALSE	FALSE	-1	-1	0	0	0	0	0	0	BASPBJ0369_pilon (Unplaced) Diploidocus:PRIMARY|PRIMARY|PRIMARY|PRIMARY|PRIMARY|PRIMARY	GOOD|EXS|REPT|NON|REP|NONE	GOOD|EXS|REPT|TOP|REP|NONE	WEAK|EXS|REPT|TOP|REP|NONE	PRIMARY	PRIMARY	PRIMARY	keep	7
BASENJISCAFF0269	61653	57	314.701	100	61653	1694	142	0.5105	0.438	18.2	33.15	48.22	BASENJISCAFF0473	BASENJISCAFF0070	64.95	2819.97	KEEP	2	9	1658	1729.6	196569	239753	0.51464	89.7853	0	0	FALSE	FALSE	-1	-1	0	0	0	0	0	0	BASPBJ0370_pilon (Unplaced) Diploidocus:PRIMARY|PRIMARY|PRIMARY|PRIMARY|PRIMARY|PRIMARY	WEAK|EXS|REPT|TOP|REP|NONE	GOOD|EXS|REPT|TOP|REP|NONE	GOOD|DIP|REPT|SEC|REP|NONE	PRIMARY	PRIMARY	PRIMARY	keep	7
BASENJISCAFF0270	2201	4	3.8632	100	2201	4	5	0.5479	100	0	0	0	-	-	0	0	JUNK	0	0	1	20.4188	0	3133.41	0.54657	17.6552	0	0	FALSE	FALSE	-1	-1	0	0	0	0	0	0	BASPBJ0371_pilon (Unplaced)	PURE|LOW|UNIQ|NON|PRI|NONE	-	-	HPURGE	-	-	quarantine	1
BASENJISCAFF0271	759	7	6.2846	100	759	7	1	0.4025	91.96	8.037	0	0	-	-	0	0	JUNK	0	0	1	1508.69	0	52574.4	0.39921	49.3861	0	0	FALSE	FALSE	-1	-1	0	0	0	0	0	0	BASPBJ0372_pilon (Unplaced)	PURE|LOW|UNIQ|NON|PRI|NONE	-	-	HPURGE	-	-	quarantine	1
BASENJISCAFF0272	1789	14	12.9195	100	1789	0	22	0.5085	4.192	95.81	0	0	BASENJISCAFF0269	BASENJISCAFF0070	89.77	507.55	KEEP	0	0	1	514.912	0	68612.7	0.52543	41.8605	0	0	FALSE	FALSE	-1	-1	0	0	0	0	0	0	BASPBJ0373_pilon (Unplaced)	PURE|HAP|REPT|NON|PRI|NONE	WEAK|EXS|REPT|TOP|REP|NONE	GOOD|DIP|REPT|TOP|REP|NONE	HPURGE	PRIMARY	PRIMARY	quarantine	1
BASENJISCAFF0273	1197	41	37.7059	99.8329	1195	19	29	0.5409	1.003	6.433	92.56	0	-	-	0	0	KEEP	0	0	2	90.146	744	17279.7	0.54887	93.9368	0	0	FALSE	FALSE	-1	-1	0	0	0	0	0	0	BASPBJ0374_pilon (Unplaced) Diploidocus:PRIMARY|PRIMARY|PRIMARY|PRIMARY|PRIMARY|PRIMARY	PURE|DIP|UNIQ|NON|ALT|NONE	-	-	PRIMARY	-	-	keep	7
BASENJISCAFF0274	1069	1	1	100	1069	0	1	0.5355	100	0	0	0	-	-	0	0	JUNK	0	0	1	26.8092	0	4438.2	0.55098	36.8169	0	0	FALSE	FALSE	-1	-1	0	0	0	0	0	0	BASPBJ0375_pilon (Unplaced)	LOWX|LOW|UNIQ|NON|PRI|NONE	-	-	LOWCOV	-	-	junk	1
BASENJISCAFF0275	1260	1	0.9825	98.254	1238	1	0	0.6421	100	0	0	0	-	-	0	0	JUNK	0	0	1	1.48947	0	49.6767	0.65635	31.1183	0	0	FALSE	FALSE	-1	-1	0	0	0	0	0	0	BASPBJ0377_pilon (Unplaced)	LOWX|LOW|UNIQ|NON|PRI|NONE	-	-	LOWCOV	-	-	junk	1
BASENJISCAFF0276	2163	11	10.5488	100	2163	15	3	0.512	20.02	79.98	0	0	BASENJISCAFF0269	BASENJISCAFF0070	65.65	135.6	KEEP	0	0	1	525.116	0	60995.8	0.51965	49.0875	0	0	FALSE	FALSE	-1	-1	0	0	0	0	0	0	BASPBJ0379_pilon (Unplaced)	GOOD|HAP|HOMO|NON|PRI|NONE	WEAK|EXS|REPT|TOP|REP|NONE	GOOD|DIP|REPT|TOP|REP|NONE	HPURGE	PRIMARY	PRIMARY	quarantine	1
BASENJISCAFF0277	102794	272	439.747	99.9679	102761	2000	1642	0.5078	12.63	0.9637	11.8	74.61	-	-	0	0	JUNK	0	0	781	1223.49	352176	379500	0.51274	99.3695	0	0	FALSE	FALSE	-1	-1	0	0	0	0	0	0	BASPBJ0380_pilon (Unplaced) Diploidocus:PRIMARY|COLLAPSED|COLLAPSED|COLLAPSED|COLLAPSED|COLLAPSED	GOOD|EXS|UNIQ|NON|REP|NONE	-	-	COLLAPSED	-	-	repeat	7
BASENJISCAFF0278	1269	11	11.2506	99.8424	1267	10	10	0.5326	24.9	75.1	0	0	BASENJISCAFF0290	BASENJISCAFF0139	62.57	92.12	KEEP	2	0	4	110.964	1667	19804.7	0.5595	95.4143	0	0	FALSE	FALSE	-1	-1	0	0	0	0	0	0	BASPBJ0381_pilon (Unplaced)	GOOD|HAP|HOMO|TOP|REP|NONE	GOOD|HAP|HOMO|TOP|REP|NONE	WEAK|HAP|PART|SEC|PRI|NONE	HPURGE	PRIMARY	PRIMARY	quarantine	1
BASENJISCAFF0279	2923	107	96.9798	99.8974	2920	55	103	0.5495	0.5811	8.245	2.874	88.3	-	-	0	0	JUNK	0	0	3	72.2375	640	14545.9	0.56346	73.5243	0	0	FALSE	FALSE	-1	-1	0	0	0	0	0	0	BASPBJ0382_pilon (Unplaced) Diploidocus:COLLAPSED|COLLAPSED|COLLAPSED|COLLAPSED|COLLAPSED|COLLAPSED	PURE|EXS|UNIQ|NON|REP|NONE	-	-	COLLAPSED	-	-	repeat	7
BASENJISCAFF0280	2803	59	55.553	99.3222	2784	2	121	0.3885	13.52	9.347	35.07	42.06	BASENJICHR12.01	BASENJICHR3.01	78.59	119.16	KEEP	1	0	2773	3187.95	124992	129172	0.39814	84.9838	0	0	FALSE	FALSE	-1	-1	0	0	0	0	0	0	BASPBJ0383_pilon (Unplaced) Diploidocus:PRIMARY|PRIMARY|PRIMARY|PRIMARY|PRIMARY|PRIMARY	WEAK|EXS|HOMO|TOP|REP|NONE	PURE|DIP|UNIQ|TOP|PRI|COMP|+VEC	PURE|DIP|UNIQ|SEC|PRI|COMP|+VEC	PRIMARY	PRIMARY	PRIMARY	keep	7
BASENJISCAFF0281	6581	15	15.998	99.8632	6572	25	23	0.5099	2.477	93.74	3.784	0	BASENJISCAFF0473	BASENJISCAFF0070	97.75	3057.95	REPEAT	0	0	1907	2017.88	206254	254527	0.51877	86.0259	0	0	FALSE	FALSE	-1	-1	0	0	0	0	0	0	BASPBJ0384_pilon (Unplaced)	PURE|HAP|REPT|NON|REP|NONE	GOOD|EXS|REPT|TOP|REP|NONE	GOOD|DIP|REPT|TOP|REP|NONE	HPURGE	PRIMARY	PRIMARY	quarantine	1
BASENJISCAFF0282	2372	69	69.7352	100	2372	75	62	0.5484	0	0	49.58	50.42	BASENJICHR35.02	BASENJICHR1.02	87.65	271.08	KEEP	0	1	13	145.561	5887	28158.7	0.57546	98.977	0	0	FALSE	FALSE	-1	-1	0	0	0	0	0	0	BASPBJ0387_pilon (Unplaced) Diploidocus:PRIMARY|PRIMARY|PRIMARY|PRIMARY|PRIMARY|PRIMARY	GOOD|EXS|REPT|SEC|REP|NONE	GOOD|EXS|REPT|TOP|REP|NONE	WEAK|DIP|REPT|TOP|REP|NONE	PRIMARY	PRIMARY	PRIMARY	keep	7
BASENJISCAFF0283	1408	4	4.1854	100	1408	1	6	0.3867	100	0	0	0	-	-	0	0	JUNK	0	0	3	1513.8	22	60512.1	0.3956	57.1635	0	0	FALSE	FALSE	-1	-1	0	0	0	0	0	0	BASPBJ0388_pilon (Unplaced)	PURE|LOW|UNIQ|NON|REP|NONE	-	-	HPURGE	-	-	quarantine	1
BASENJISCAFF0284	26675	92	96.0893	100	26675	229	345	0.5062	0	0.015	29.13	70.85	BASENJISCAFF0190	BASENJISCAFF1053	78.18	248.78	KEEP	26	12	711	1110.26	321693	329751	0.50909	97.8198	0	0	FALSE	FALSE	-1	-1	0	0	0	0	0	0	BASPBJ0389_pilon (Unplaced) Diploidocus:PRIMARY|PRIMARY|PRIMARY|PRIMARY|PRIMARY|PRIMARY	GOOD|EXS|HOMO|TOP|REP|NONE	WEAK|EXS|REPT|TOP|REP|NONE	GOOD|EXS|REPT|TOP|REP|NONE	PRIMARY	PRIMARY	PRIMARY	keep	7
BASENJISCAFF0285	10418	20	18.1195	100	10418	50	8	0.546	0.298	91.83	7.871	0	BASENJICHR35.02	BASENJICHR1.02	97.95	381.57	KEEP	0	0	1	15.6774	0	2558.11	0.54195	18.2833	0	0	FALSE	FALSE	-1	-1	0	0	0	0	0	0	BASPBJ0391_pilon (Unplaced) Diploidocus:PRIMARY	PURE|HAP|REPT|NON|PRI|NONE	GOOD|EXS|REPT|TOP|REP|NONE	WEAK|DIP|REPT|TOP|REP|NONE	HPURGE	PRIMARY	PRIMARY	quarantine	2
BASENJISCAFF0286	630	2	1.6429	99.8413	629	1	1	0.4027	100	0	0	0	-	-	0	0	JUNK	0	0	10	965.205	196	28936	0.42698	72.6821	0	0	FALSE	FALSE	-1	-1	0	0	0	0	0	0	BASPBJ0393_pilon (Unplaced)	LOWX|LOW|UNIQ|NON|REP|NONE	-	-	LOWCOV	-	-	junk	1
BASENJISCAFF0287	707	8	7.0778	100	707	9	1	0.5661	44.27	55.73	0	0	BASENJISCAFF1036	-	12.45	12.45	KEEP	0	0	1	1.5859	0	177.11	0.57709	22.3201	0	0	FALSE	FALSE	-1	-1	0	0	0	0	0	0	BASPBJ0395_pilon (Unplaced)	GOOD|HAP|PART|NON|PRI|NONE	GOOD|LOW|HOMO|TOP|PRI|NONE	-	HPURGE	HPURGE	-	quarantine	1
BASENJISCAFF0288	1959	58	52.487	99.1833	1943	44	39	0.5513	10.06	0	89.94	0	-	-	0	0	KEEP	0	0	2	259.032	983	22432.9	0.56253	93.1712	0	0	FALSE	FALSE	-1	-1	0	0	0	0	0	0	BASPBJ0396_pilon (Unplaced) Diploidocus:COLLAPSED|PRIMARY|PRIMARY|PRIMARY|PRIMARY|PRIMARY	PURE|DIP|UNIQ|NON|ALT|NONE	-	-	PRIMARY	-	-	keep	7
BASENJISCAFF0289	582	22	19.4863	100	582	25	1	0.5213	2.405	97.59	0	0	BASENJISCAFF0749	BASENJISCAFF0673	41.75	83.51	KEEP	0	0	1	238.336	0	62901.5	0.53608	35.0719	0	0	FALSE	FALSE	-1	-1	0	0	0	0	0	0	BASPBJ0397_pilon (Unplaced) Diploidocus:PRIMARY|PRIMARY	PURE|HAP|PART|NON|PRI|NONE	GOOD|EXS|HOMO|TOP|REP|NONE	GOOD|EXS|REPT|SEC|REP|NONE	HPURGE	PRIMARY	PRIMARY	quarantine	3
BASENJISCAFF0290	1096	30	29.7947	100	1096	19	24	0.5428	0	10.68	89.33	0	-	-	0	0	KEEP	1	0	4	87.1411	2199	15874.6	0.56752	98.785	0	0	FALSE	FALSE	-1	-1	0	0	0	0	0	0	BASPBJ0398_pilon (Unplaced) Diploidocus:PRIMARY|PRIMARY|PRIMARY|PRIMARY|PRIMARY|PRIMARY	PURE|DIP|UNIQ|TOP|REP|NONE	-	-	PRIMARY	-	-	keep	7
BASENJISCAFF0291	1034	4	4.1335	99.5164	1029	8	2	0.549	100	0	0	0	-	-	0	0	JUNK	0	0	1	24.4573	0	4901.89	0.55126	33.3333	0	0	FALSE	FALSE	-1	-1	0	0	0	0	0	0	BASPBJ0399_pilon (Unplaced)	PURE|LOW|UNIQ|NON|PRI|NONE	-	-	HPURGE	-	-	quarantine	1
BASENJISCAFF0292	503	5	5.2505	100	503	7	1	0.5133	100	0	0	0	-	-	0	0	JUNK	0	0	7	742.26	101	89008.3	0.5169	60.3774	0	0	FALSE	FALSE	-1	-1	0	0	0	0	0	0	BASPBJ0400_pilon (Unplaced)	PURE|LOW|UNIQ|NON|REP|NONE	-	-	HPURGE	-	-	quarantine	1
BASENJISCAFF0293	774	0	0.2817	28.1654	218	1	0	0.3571	100	0	0	0	-	-	0	0	JUNK	0	0	1	1.3008	0	54.9051	0.50517	7.21925	0	0	FALSE	FALSE	-1	-1	0	0	0	0	0	0	BASPBJ0402_pilon (Unplaced)	LOWX|LOW|UNIQ|NON|PRI|NONE	-	-	LOWCOV	-	-	junk	1
BASENJISCAFF0294	5100	18	17.148	100	5100	13	18	0.5019	0.118	99.88	0	0	BASENJICHR11.02	BASENJISCAFF0299	46.9	94.73	KEEP	0	0	1931	4237.38	204050	303435	0.51078	95.0532	0	0	FALSE	FALSE	-1	-1	0	0	0	0	0	0	BASPBJ0403_pilon (Unplaced)	PURE|HAP|PART|NON|REP|NONE	GOOD|DIP|REPT|TOP|REP|NONE	GOOD|EXS|REPT|TOP|REP|NONE	HPURGE	PRIMARY	COLLAPSED	quarantine	1
BASENJISCAFF0295	10680	40	52.9554	99.9813	10678	104	97	0.549	0.01873	33.32	29.66	36.99	BASENJICHR35.02	BASENJISCAFF0340	96.94	261.38	REPEAT	0	0	1	187.287	0	14164	0.55169	46.1705	0	0	FALSE	FALSE	-1	-1	0	0	0	0	0	0	BASPBJ0404_pilon (Unplaced) Diploidocus:PRIMARY|PRIMARY|PRIMARY|PRIMARY|PRIMARY|PRIMARY	WEAK|EXS|REPT|NON|PRI|NONE	GOOD|EXS|REPT|TOP|REP|NONE	PURE|DIP|UNIQ|SEC|PRI|NONE	PRIMARY	PRIMARY	PRIMARY	keep	7
BASENJISCAFF0296	3273	189	174.469	99.7556	3265	187	201	0.5509	1.497	0.1227	1.375	97.01	-	-	0	0	JUNK	0	0	2	5.92978	1274	3205.24	0.58265	96.1811	0	0	FALSE	FALSE	-1	-1	0	0	0	0	0	0	BASPBJ0405_pilon (Unplaced) Diploidocus:COLLAPSED|COLLAPSED|COLLAPSED|COLLAPSED|COLLAPSED|COLLAPSED	PURE|EXS|UNIQ|NON|ALT|NONE	-	-	COLLAPSED	-	-	repeat	7
BASENJISCAFF0297	2321	5	5.4692	100	2321	4	10	0.5569	69.15	30.85	0	0	BASENJICHR35.02	BASENJICHR1.02	49.07	58.29	KEEP	0	0	1	51.4375	0	8106.94	0.57001	48.3224	0	0	FALSE	FALSE	-1	-1	0	0	0	0	0	0	BASPBJ0406_pilon (Unplaced)	GOOD|LOW|PART|NON|PRI|NONE	GOOD|EXS|REPT|TOP|REP|NONE	GOOD|DIP|REPT|TOP|REP|NONE	HPURGE	PRIMARY	PRIMARY	quarantine	1
BASENJISCAFF0298	22981	41	69.8101	99.9869	22978	210	266	0.5434	0.2	31.4	36.93	31.47	BASENJICHR35.02	BASENJISCAFF0053	88.41	402.4	KEEP	0	2	1	70.3345	0	7674.59	0.53731	35.2254	0	0	FALSE	FALSE	-1	-1	0	0	0	0	0	0	BASPBJ0407_pilon (Unplaced) Diploidocus:PRIMARY|PRIMARY|PRIMARY|PRIMARY|PRIMARY|PRIMARY	WEAK|DIP|REPT|SEC|PRI|NONE	GOOD|EXS|REPT|TOP|REP|NONE	WEAK|EXS|REPT|SEC|ALT|NONE	PRIMARY	PRIMARY	KEEP	keep	7
BASENJISCAFF0299	117056	122	230.583	100	117056	653	2113	0.5085	0	0.293	20.84	78.86	BASENJISCAFF0810	BASENJISCAFF0905	87.43	1460.21	KEEP	18	7	1808	1970.44	210761	267937	0.51281	97.9886	0	0	FALSE	FALSE	-1	-1	0	0	0	0	0	0	BASPBJ0409_pilon (Unplaced) Diploidocus:COLLAPSED|PRIMARY|PRIMARY|PRIMARY|PRIMARY|PRIMARY	GOOD|EXS|REPT|TOP|REP|NONE	GOOD|DIP|REPT|TOP|REP|NONE	PURE|DIP|UNIQ|SEC|REP|NONE	PRIMARY	PRIMARY	PRIMARY	keep	7
BASENJISCAFF0300	607	3	2.8666	100	607	3	0	0.5014	100	0	0	0	-	-	0	0	JUNK	0	0	2	520.267	5	103037	0.50247	55.0774	0	0	FALSE	FALSE	-1	-1	0	0	0	0	0	0	BASPBJ0410_pilon (Unplaced)	PURE|LOW|UNIQ|NON|ALT|NONE	-	-	HPURGE	-	-	quarantine	1
BASENJISCAFF0301	3098	36	39.4877	100	3098	42	58	0.5415	3.777	21.76	64.62	9.845	BASENJICHR35.02	BASENJISCAFF0329	73.18	246.97	KEEP	0	1	2	88.7041	510	15768	0.55261	72.4284	0	0	FALSE	FALSE	-1	-1	0	0	0	0	0	0	BASPBJ0411_pilon (Unplaced) Diploidocus:PRIMARY|PRIMARY|PRIMARY|PRIMARY|PRIMARY|PRIMARY	GOOD|DIP|HOMO|SEC|ALT|NONE	GOOD|EXS|REPT|TOP|REP|NONE	GOOD|DIP|REPT|SEC|REP|NONE	PRIMARY	PRIMARY	PRIMARY	keep	7
BASENJISCAFF0302	712	15	15.2851	100	712	17	5	0.5016	1.124	98.88	0	0	BASENJISCAFF0891	BASENJISCAFF0833	58.57	69.94	KEEP	1	0	50	741.229	2233	183142	0.51264	76.3848	0	0	FALSE	FALSE	-1	-1	0	0	0	0	0	0	BASPBJ0412_pilon (Unplaced)	PURE|HAP|HOMO|TOP|REP|NONE	PURE|HAP|PART|TOP|REP|NONE	WEAK|DIP|REPT|TOP|REP|NONE	HPURGE	HPURGE	PRIMARY	quarantine	1
BASENJISCAFF0303	22251	31	29.536	100	22251	66	52	0.5093	6.242	34.98	58.78	0	BASENJISCAFF0664	BASENJICHR24.02	96.64	599.79	REPEAT	0	0	1830	1978.66	212890	270190	0.51229	98.4657	0	0	FALSE	FALSE	-1	-1	0	0	0	0	0	0	BASPBJ0413_pilon (Unplaced) Diploidocus:PRIMARY|PRIMARY|PRIMARY|PRIMARY|PRIMARY|PRIMARY	GOOD|DIP|REPT|NON|REP|NONE	GOOD|HAP|REPT|TOP|REP|NONE	GOOD|DIP|REPT|SEC|REP|NONE	PRIMARY	PRIMARY	PRIMARY	keep	7
BASENJISCAFF0304	788	23	21.8744	100	788	30	2	0.5111	1.396	59.52	39.09	0	BASENJISCAFF0487	BASENJISCAFF0907	100	165.99	HAPLOTIG	0	0	1	343.887	2	107016	0.52411	53.937	0	0	FALSE	FALSE	-1	-1	0	0	0	0	0	0	BASPBJ0414_pilon (Unplaced) Diploidocus:PRIMARY|PRIMARY|PRIMARY|PRIMARY|PRIMARY|PRIMARY	GOOD|HAP|HOMO|NON|PRI|NONE	PURE|DIP|UNIQ|TOP|REP|NONE	GOOD|DIP|REPT|SEC|REP|NONE	PRIMARY	PRIMARY	PRIMARY	keep	7
BASENJISCAFF0305	2343	4	3.8323	100	2343	7	1	0.5147	100	0	0	0	-	-	0	0	JUNK	0	0	1751	1788.15	187713	217904	0.51857	82.3479	0	0	FALSE	FALSE	-1	-1	0	0	0	0	0	0	BASPBJ0416_pilon (Unplaced)	PURE|LOW|UNIQ|NON|REP|NONE	-	-	HPURGE	-	-	quarantine	1
BASENJISCAFF0306	13125	488	457.958	99.9467	13118	523	568	0.5507	0.5261	0.07596	0.1979	99.2	-	-	0	0	JUNK	0	0	292	293.275	52291	51000.2	0.58484	95.5645	0	0	FALSE	FALSE	-1	-1	0	0	0	0	0	0	BASPBJ0417_pilon (Unplaced) Diploidocus:COLLAPSED|COLLAPSED|COLLAPSED|COLLAPSED|COLLAPSED|COLLAPSED	PURE|EXS|UNIQ|NON|REP|NONE	-	-	COLLAPSED	-	-	repeat	7
BASENJISCAFF0307	1101	7	5.8883	100	1101	1	8	0.5583	52.86	47.14	0	0	BASENJICHR35.02	BASENJISCAFF0997	36.51	67.03	KEEP	0	0	1	1.92558	0	181.358	0.56585	16.8372	0	0	FALSE	FALSE	-1	-1	0	0	0	0	0	0	BASPBJ0419_pilon (Unplaced)	GOOD|LOW|PART|NON|PRI|NONE	GOOD|EXS|REPT|TOP|REP|NONE	GOOD|EXS|REPT|TOP|PRI|NONE	HPURGE	PRIMARY	PRIMARY	quarantine	1
BASENJISCAFF0308	15536	22	130.111	99.8262	15509	281	238	0.5492	0.2317	51.99	0.4053	47.37	BASENJICHR35.02	BASENJISCAFF0298	95.09	702.3	REPEAT	0	0	1	38.8441	0	7371.95	0.55433	38.2076	0	0	FALSE	FALSE	-1	-1	0	0	0	0	0	0	BASPBJ0425_pilon (Unplaced) Diploidocus:KEEP|KEEP|REPEAT|REPEAT|REPEAT|REPEAT	GOOD|HAP|REPT|NON|PRI|NONE	GOOD|EXS|REPT|TOP|REP|NONE	WEAK|DIP|REPT|SEC|PRI|NONE	REPEAT	PRIMARY	PRIMARY	repeat	7
BASENJISCAFF0309	773	1	0.9961	99.6119	770	0	1	0.3872	100	0	0	0	-	-	0	0	JUNK	0	0	1	19.6586	21	546.916	0.39845	57.162	0	0	FALSE	FALSE	-1	-1	0	0	0	0	0	0	BASPBJ0426_pilon (Unplaced)	LOWX|LOW|UNIQ|NON|PRI|NONE	-	-	LOWCOV	-	-	junk	1
BASENJISCAFF0310	1245	7	6.4667	99.759	1242	0	12	0.5119	59.52	40.48	0	0	BASENJISCAFF0473	BASENJISCAFF0269	89.96	289.48	KEEP	0	0	1850	2035.23	197559	250888	0.51888	87.3667	0	0	FALSE	FALSE	-1	-1	0	0	0	0	0	0	BASPBJ0427_pilon (Unplaced)	GOOD|LOW|REPT|NON|REP|NONE	GOOD|EXS|REPT|TOP|REP|NONE	WEAK|EXS|REPT|TOP|REP|NONE	HPURGE	PRIMARY	PRIMARY	quarantine	1
BASENJISCAFF0311	9548	519	465.976	99.1935	9471	631	539	0.5488	0.8689	0	0.09423	99.04	-	-	0	0	JUNK	0	0	6	109.527	3326	20847.3	0.57049	91.7139	0	0	FALSE	FALSE	-1	-1	0	0	0	0	0	0	BASPBJ0428_pilon (Unplaced) Diploidocus:COLLAPSED|COLLAPSED|COLLAPSED|COLLAPSED|COLLAPSED|COLLAPSED	PURE|EXS|UNIQ|NON|REP|NONE	-	-	COLLAPSED	-	-	repeat	7
BASENJISCAFF0312	8227	22	21.1674	100	8227	22	32	0.4969	2.212	87.69	10.1	0	BASENJICHRX.03	BASENJISCAFF0705	96.83	847	KEEP	0	0	742	2147.12	306577	342123	0.50687	99.8537	0	0	FALSE	FALSE	-1	-1	0	0	0	0	0	0	BASPBJ0431_pilon (Unplaced) Diploidocus:PRIMARY|PRIMARY	PURE|HAP|REPT|NON|REP|NONE	GOOD|EXS|HOMO|TOP|REP|NONE	GOOD|DIP|REPT|TOP|REP|NONE	HPURGE	PRIMARY	PRIMARY	quarantine	3
BASENJISCAFF0313	497	1	1	100	497	1	0	0.4286	100	0	0	0	-	-	0	0	JUNK	0	0	1	52.879	0	2054	0.44467	29.2994	0	0	FALSE	FALSE	-1	-1	0	0	0	0	0	0	BASPBJ0432_pilon (Unplaced)	LOWX|LOW|UNIQ|NON|PRI|NONE	-	-	LOWCOV	-	-	junk	1
BASENJISCAFF0314	41466	682	686.324	99.9301	41437	1574	23	0.5094	0.07194	0	0.01899	99.91	-	-	0	0	JUNK	0	0	1577	1623.89	177759	218021	0.51575	81.8243	0	0	FALSE	FALSE	-1	-1	0	0	0	0	0	0	BASPBJ0434_pilon (Unplaced) Diploidocus:COLLAPSED|COLLAPSED|COLLAPSED|COLLAPSED|COLLAPSED|COLLAPSED	PURE|EXS|UNIQ|NON|REP|NONE	-	-	COLLAPSED	-	-	repeat	7
BASENJISCAFF0315	68355	527	496.667	99.9927	68350	1787	704	0.5068	0.01731	0.022	1.413	98.55	-	-	0	0	JUNK	0	0	749	1265.7	337257	355159	0.51203	98.1209	0	0	FALSE	FALSE	-1	-1	0	0	0	0	0	0	BASPBJ0436_pilon (Unplaced) Diploidocus:COLLAPSED|COLLAPSED|COLLAPSED|COLLAPSED|COLLAPSED|COLLAPSED	PURE|EXS|UNIQ|NON|REP|NONE	-	-	COLLAPSED	-	-	repeat	7
BASENJISCAFF0316	2345	4	4.4964	100	2345	1	11	0.5155	100	0	0	0	-	-	0	0	JUNK	0	0	1839	1958.77	197592	240343	0.5194	84.433	0	0	FALSE	FALSE	-1	-1	0	0	0	0	0	0	BASPBJ0437_pilon (Unplaced)	PURE|LOW|UNIQ|NON|REP|NONE	-	-	HPURGE	-	-	quarantine	1
BASENJISCAFF0317	30811	0	25.9744	42.9976	13248	288	216	0.3225	94.15	0.00344	0.1135	5.732	-	-	0	0	JUNK	0	0	1	56.671	0	2816.24	0.43478	11.8077	0	0	FALSE	FALSE	-1	-1	0	0	0	0	0	0	BASPBJ0438_pilon (Unplaced)	LOWX|LOW|UNIQ|NON|PRI|NONE	-	-	LOWCOV	-	-	junk	1
BASENJISCAFF0318	4519	1	2.6979	93.8703	4242	12	1	0.4149	83.58	16.42	0	0	-	-	0	0	JUNK	0	0	1	182.637	0	6272.67	0.47024	25.5509	0	0	FALSE	FALSE	-1	-1	0	0	0	0	0	0	BASPBJ0440_pilon (Unplaced)	LOWX|LOW|UNIQ|NON|PRI|NONE	-	-	LOWCOV	-	-	junk	1
BASENJISCAFF0319	44007	1192	1160.72	100	44007	229	3053	0.5061	0	0	0	100	-	-	0	0	JUNK	0	0	1	170.323	0	51004.1	0.50756	32.5368	0	0	FALSE	FALSE	-1	-1	0	0	0	0	0	0	BASPBJ0441_pilon (Unplaced) Diploidocus:COLLAPSED|COLLAPSED|COLLAPSED|COLLAPSED|COLLAPSED|COLLAPSED	PURE|EXS|UNIQ|NON|PRI|NONE	-	-	COLLAPSED	-	-	repeat	7
BASENJISCAFF0320	3949	31	30.4145	100	3949	28	35	0.5514	0	20.99	79.01	0	BASENJISCAFF0615	BASENJICHR35.02	86.1	271.97	KEEP	1	1	3	98.7344	972	16565	0.56799	89.7018	0	0	FALSE	FALSE	-1	-1	0	0	0	0	0	0	BASPBJ0442_pilon (Unplaced) Diploidocus:PRIMARY|PRIMARY|PRIMARY|PRIMARY|PRIMARY|PRIMARY	GOOD|DIP|REPT|TOP|REP|NONE	GOOD|EXS|HOMO|TOP|REP|NONE	GOOD|EXS|REPT|TOP|REP|NONE	PRIMARY	COLLAPSED	PRIMARY	keep	7
BASENJISCAFF0321	1288	11	11.2453	99.8447	1286	3	17	0.3679	11.8	88.2	0	0	BASENJICHRX.01X	BASENJICHR4.01	99.61	386.72	REPEAT	0	0	1344	1543.11	63882	65540.2	0.36957	92.71	0	0	FALSE	FALSE	-1	-1	0	0	0	0	0	0	BASPBJ0443_pilon (Unplaced)	PURE|HAP|REPT|NON|REP|NONE	PURE|DIP|UNIQ|TOP|PRI|NONE|+TEL|+VEC	PURE|DIP|UNIQ|TOP|PRI|COMP|+VEC	HPURGE	PRIMARY	PRIMARY	quarantine	1
BASENJISCAFF0322	98002	2	13.3313	77.7311	76178	230	69	0.5118	80	4.933	8.695	6.37	-	-	0	0	JUNK	0	0	1968	2083.5	206904	258420	0.52252	88.3665	0	0	FALSE	FALSE	-1	-1	0	0	0	0	0	0	BASPBJ0444_pilon (Unplaced)	LOWX|LOW|UNIQ|NON|REP|NONE	-	-	LOWCOV	-	-	junk	1
BASENJISCAFF0323	1418	6	5.8364	98.0254	1390	6	2	0.5114	71.44	28.56	0	0	BASENJISCAFF0473	BASENJISCAFF0269	87.66	856.63	KEEP	0	0	1676	1752.71	172551	214212	0.52257	86.2787	0	0	FALSE	FALSE	-1	-1	0	0	0	0	0	0	BASPBJ0445_pilon (Unplaced)	GOOD|LOW|REPT|NON|REP|NONE	GOOD|EXS|REPT|TOP|REP|NONE	WEAK|EXS|REPT|TOP|REP|NONE	HPURGE	PRIMARY	PRIMARY	quarantine	1
BASENJISCAFF0324	3431	48	47.1594	100	3431	2	99	0.4114	1.661	19.59	54.04	24.72	BASENJICHR9.01	BASENJICHR4.01	97.06	993.12	REPEAT	0	0	1234	1475.48	48536	62810.3	0.43311	85.1689	0	0	FALSE	FALSE	-1	-1	0	0	0	0	0	0	BASPBJ0446_pilon (Unplaced) Diploidocus:PRIMARY|PRIMARY|PRIMARY|PRIMARY|PRIMARY|PRIMARY	GOOD|DIP|REPT|NON|REP|NONE	PURE|DIP|UNIQ|TOP|PRI|COMP	PURE|DIP|UNIQ|SEC|PRI|COMP|+VEC	PRIMARY	PRIMARY	PRIMARY	keep	7
BASENJISCAFF0325	88466	79	90.3484	100	88466	541	534	0.5086	1.174	3.077	27.03	68.72	BASENJISCAFF0473	BASENJICHR11.02	85.65	1701.69	KEEP	3	4	1820	2092.83	210285	270462	0.51458	97.9919	0	0	FALSE	FALSE	-1	-1	0	0	0	0	0	0	BASPBJ0447_pilon (Unplaced) Diploidocus:PRIMARY|PRIMARY|PRIMARY|PRIMARY|PRIMARY|PRIMARY	GOOD|EXS|REPT|TOP|REP|NONE	GOOD|EXS|REPT|TOP|REP|NONE	GOOD|DIP|REPT|TOP|REP|NONE	PRIMARY	PRIMARY	PRIMARY	keep	7
BASENJISCAFF0326	1832	28	27.6927	100	1832	24	17	0.5451	2.238	39.74	58.02	0	BASENJISCAFF0060	BASENJISCAFF0257	36.19	36.19	KEEP	0	1	1	17.608	0	3766.1	0.55022	46.2348	0	0	FALSE	FALSE	-1	-1	0	0	0	0	0	0	BASPBJ0448_pilon (Unplaced) Diploidocus:PRIMARY|PRIMARY|PRIMARY|PRIMARY|PRIMARY|PRIMARY	GOOD|DIP|PART|SEC|PRI|NONE	WEAK|LOW|HOMO|TOP|PRI|NONE	WEAK|HAP|PART|SEC|PRI|NONE	PRIMARY	PRIMARY	PRIMARY	keep	7
BASENJISCAFF0327	2439	18	16.6039	100	2439	7	27	0.505	2.706	97.29	0	0	BASENJISCAFF0344	BASENJISCAFF0758	39.65	78.72	KEEP	1	0	638	1085.71	275482	280786	0.50841	87.4016	0	0	FALSE	FALSE	-1	-1	0	0	0	0	0	0	BASPBJ0449_pilon (Unplaced)	PURE|HAP|PART|TOP|REP|NONE	GOOD|EXS|REPT|TOP|REP|NONE	PURE|HAP|HOMO|SEC|REP|NONE	HPURGE	PRIMARY	HPURGE	quarantine	1
BASENJISCAFF0328	1952	9	9.8094	100	1952	22	0	0.5104	47.44	52.56	0	0	BASENJISCAFF0299	BASENJISCAFF0664	85.91	532.53	KEEP	0	0	1	608.732	0	73049.9	0.53176	45.6906	0	0	FALSE	FALSE	-1	-1	0	0	0	0	0	0	BASPBJ0450_pilon (Unplaced)	GOOD|HAP|REPT|NON|PRI|NONE	GOOD|EXS|REPT|TOP|REP|NONE	GOOD|HAP|REPT|TOP|REP|NONE	HPURGE	COLLAPSED	PRIMARY	quarantine	1
BASENJISCAFF0329	3394	55	47.4337	99.7643	3386	67	60	0.5333	0.7954	26.31	62.67	10.22	BASENJICHR35.02	BASENJISCAFF0301	81.97	645.88	KEEP	0	1	6	337.868	2176	25353.1	0.54095	84.9762	0	0	FALSE	FALSE	-1	-1	0	0	0	0	0	0	BASPBJ0451_pilon (Unplaced) Diploidocus:PRIMARY|PRIMARY|PRIMARY|PRIMARY|PRIMARY|PRIMARY	GOOD|DIP|REPT|SEC|REP|NONE	GOOD|EXS|REPT|TOP|REP|NONE	GOOD|DIP|HOMO|SEC|ALT|NONE	PRIMARY	PRIMARY	PRIMARY	keep	7
BASENJISCAFF0330	1263	25	23.9802	100	1263	31	8	0.4984	0.792	50.83	48.38	0	BASENJISCAFF0589	BASENJISCAFF0750	48.69	90.02	KEEP	0	0	14	531.003	1024	148755	0.51465	72.2716	0	0	FALSE	FALSE	-1	-1	0	0	0	0	0	0	BASPBJ0452_pilon (Unplaced) Diploidocus:PRIMARY|PRIMARY|PRIMARY|PRIMARY|PRIMARY|PRIMARY	GOOD|HAP|PART|NON|REP|NONE	GOOD|EXS|REPT|TOP|REP|NONE	GOOD|DIP|HOMO|SEC|REP|NONE	PRIMARY	PRIMARY	PRIMARY	keep	7
BASENJISCAFF0331	2167	31	26.4642	100	2167	31	38	0.4716	16.34	15.51	68.16	0	BASENJICHR1.02	BASENJICHR19.01	77.39	2388.74	KEEP	0	0	1	272.539	43	8440.83	0.4707	55.6749	0	0	FALSE	FALSE	-1	-1	0	0	0	0	0	0	BASPBJ0453_pilon (Unplaced) Diploidocus:PRIMARY|PRIMARY|PRIMARY|PRIMARY|PRIMARY|PRIMARY	GOOD|DIP|REPT|NON|PRI|NONE	WEAK|DIP|REPT|TOP|REP|NONE	PURE|DIP|UNIQ|TOP|PRI|COMP	PRIMARY	PRIMARY	PRIMARY	keep	7
BASENJISCAFF0332	1085	19	16.482	99.447	1079	1	21	0.5068	2.581	97.42	0	0	BASENJISCAFF0585	BASENJISCAFF0365	86.45	244.24	KEEP	0	1	821	1002.13	308169	277122	0.51797	79.9811	0	0	FALSE	FALSE	-1	-1	0	0	0	0	0	0	BASPBJ0455_pilon (Unplaced)	PURE|HAP|HOMO|SEC|REP|NONE	WEAK|DIP|REPT|TOP|REP|NONE	GOOD|DIP|HOMO|TOP|REP|NONE	HPURGE	PRIMARY	PRIMARY	quarantine	1
BASENJISCAFF0333	567	9	8.7108	100	567	9	3	0.3808	34.39	65.61	0	0	BASENJISCAFF0385	BASENJICHRX.01X	21.34	36.68	KEEP	1	0	274	3021.11	12210	126422	0.37037	83.7338	0	0	FALSE	FALSE	-1	-1	0	0	0	0	0	0	BASPBJ0456_pilon (Unplaced)	GOOD|HAP|PART|TOP|REP|NONE	GOOD|LOW|PART|TOP|REP|NONE	PURE|DIP|UNIQ|TOP|PRI|NONE|+TEL|+VEC	HPURGE	HPURGE	PRIMARY	quarantine	1
BASENJISCAFF0334	2373	33	32.4437	100	2373	29	31	0.493	0.042	26.34	73.62	0	BASENJICHR9.03	BASENJISCAFF0572	88.24	2816.14	KEEP	0	0	29	645.351	5332	132025	0.49979	94.1201	0	0	FALSE	FALSE	-1	-1	0	0	0	0	0	0	BASPBJ0458_pilon (Unplaced) Diploidocus:PRIMARY|PRIMARY|PRIMARY|PRIMARY|PRIMARY|PRIMARY	GOOD|DIP|REPT|NON|REP|NONE	WEAK|DIP|REPT|TOP|REP|NONE	GOOD|DIP|REPT|TOP|REP|NONE	PRIMARY	PRIMARY	PRIMARY	keep	7
BASENJISCAFF0335	1305	28	22.2789	100	1305	20	23	0.5544	31.42	13.49	55.1	0	BASENJICHR35.02	BASENJISCAFF0603	95.1	202.68	HAPLOTIG	0	0	1	94.4316	469	17022.3	0.57088	63.018	0	0	FALSE	FALSE	-1	-1	0	0	0	0	0	0	BASPBJ0460_pilon (Unplaced) Diploidocus:PRIMARY|PRIMARY|PRIMARY|PRIMARY|PRIMARY|PRIMARY	GOOD|DIP|HOMO|NON|PRI|NONE	GOOD|EXS|REPT|TOP|REP|NONE	GOOD|DIP|HOMO|SEC|PRI|NONE	PRIMARY	PRIMARY	PRIMARY	keep	7
BASENJISCAFF0336	3309	1	0.9099	90.9943	3011	0	1	0.4188	100	0	0	0	-	-	0	0	JUNK	0	0	1	108.272	0	2968.9	0.40798	29.6985	0	0	FALSE	FALSE	-1	-1	0	0	0	0	0	0	BASPBJ0461_pilon (Unplaced)	LOWX|LOW|UNIQ|NON|PRI|NONE	-	-	LOWCOV	-	-	junk	1
BASENJISCAFF0337	984	1	1.3557	87.0935	857	1	2	0.5385	100	0	0	0	-	-	0	0	JUNK	0	0	1	12.8935	0	2145.43	0.56199	21.8163	0	0	FALSE	FALSE	-1	-1	0	0	0	0	0	0	BASPBJ0463_pilon (Unplaced)	LOWX|LOW|UNIQ|NON|PRI|NONE	-	-	LOWCOV	-	-	junk	1
BASENJISCAFF0338	2305	47	43.4456	100	2305	51	41	0.5526	0.043	7.115	92.84	0	-	-	0	0	KEEP	0	1	9	125.886	3843	24062.3	0.57484	93.1988	0	0	FALSE	FALSE	-1	-1	0	0	0	0	0	0	BASPBJ0464_pilon (Unplaced) Diploidocus:PRIMARY|PRIMARY|PRIMARY|PRIMARY|PRIMARY|PRIMARY	PURE|DIP|UNIQ|SEC|REP|NONE	-	-	PRIMARY	-	-	keep	7
BASENJISCAFF0339	526	1	1	100	526	1	0	0.5202	100	0	0	0	-	-	0	0	JUNK	0	0	1	1.63	0	184.064	0.53422	19.2	0	0	FALSE	FALSE	-1	-1	0	0	0	0	0	0	BASPBJ0465_pilon (Unplaced)	LOWX|LOW|UNIQ|NON|PRI|NONE	-	-	LOWCOV	-	-	junk	1
BASENJISCAFF0340	26786	34	39.9239	100	26786	65	123	0.549	0.004	9.501	89.67	0.829	-	-	0	0	KEEP	0	1	1	73.4693	0	4454.67	0.54323	20.994	0	0	FALSE	FALSE	-1	-1	0	0	0	0	0	0	BASPBJ0466_pilon (Unplaced) Diploidocus:PRIMARY|PRIMARY|PRIMARY|PRIMARY|PRIMARY|PRIMARY	PURE|DIP|UNIQ|SEC|PRI|NONE	-	-	PRIMARY	-	-	keep	7
BASENJISCAFF0341	2843	39	36.0883	100	2843	35	27	0.5127	0.422	27.47	72.11	0	BASENJISCAFF0135	BASENJISCAFF0884	78.58	342.31	KEEP	0	0	1555	1603.32	172907	216527	0.52163	78.8782	0	0	FALSE	FALSE	-1	-1	0	0	0	0	0	0	BASPBJ0467_pilon (Unplaced) Diploidocus:PRIMARY|PRIMARY|PRIMARY|PRIMARY|PRIMARY|PRIMARY	GOOD|DIP|REPT|NON|REP|NONE	WEAK|HAP|REPT|TOP|REP|NONE	GOOD|EXS|REPT|TOP|REP|NONE	PRIMARY	KEEP	PRIMARY	keep	7
BASENJISCAFF0342	3302	162	139.254	100	3302	131	154	0.549	1.757	15.23	0.515	82.5	-	-	0	0	JUNK	0	0	5	111.873	2603	21034.5	0.56965	93.6813	0	0	FALSE	FALSE	-1	-1	0	0	0	0	0	0	BASPBJ0468_pilon (Unplaced) Diploidocus:COLLAPSED|COLLAPSED|COLLAPSED|COLLAPSED|COLLAPSED|COLLAPSED	PURE|EXS|UNIQ|NON|REP|NONE	-	-	COLLAPSED	-	-	repeat	7
BASENJISCAFF0343	72128	34	32.0176	100	72128	252	117	0.5106	0	27.5	72.5	0	BASENJISCAFF0299	BASENJISCAFF0810	99.73	2995.07	REPEAT	0	0	1781	1895.5	208391	257130	0.51371	97.4966	0	0	FALSE	FALSE	-1	-1	0	0	0	0	0	0	BASPBJ0469_pilon (Unplaced) Diploidocus:PRIMARY|PRIMARY|PRIMARY|PRIMARY|PRIMARY|PRIMARY	GOOD|DIP|REPT|NON|REP|NONE	GOOD|EXS|REPT|TOP|REP|NONE	GOOD|DIP|REPT|TOP|REP|NONE	PRIMARY	PRIMARY	PRIMARY	keep	7
BASENJISCAFF0344	22274	125	157.81	100	22274	248	229	0.4987	0.009	0.036	18.04	81.91	-	-	0	0	JUNK	0	0	699	1165.56	308683	331352	0.50786	98.0268	0	0	FALSE	FALSE	-1	-1	0	0	0	0	0	0	BASPBJ0471_pilon (Unplaced) Diploidocus:PRIMARY|PRIMARY|COLLAPSED|COLLAPSED|COLLAPSED|COLLAPSED	PURE|EXS|UNIQ|NON|REP|NONE	-	-	COLLAPSED	-	-	repeat	7
BASENJISCAFF0345	31385	33	32.0366	100	31385	92	65	0.5107	3.177	33.25	63.57	0	BASENJICHR8.03	BASENJISCAFF0473	96.57	1098.53	REPEAT	0	0	1824	2025.74	208707	273808	0.51556	95.3984	0	0	FALSE	FALSE	-1	-1	0	0	0	0	0	0	BASPBJ0473_pilon (Unplaced) Diploidocus:PRIMARY|PRIMARY|PRIMARY|PRIMARY|PRIMARY|PRIMARY	GOOD|DIP|REPT|NON|REP|NONE	GOOD|DIP|REPT|TOP|REP|NONE	GOOD|EXS|REPT|TOP|REP|NONE	PRIMARY	PRIMARY	PRIMARY	keep	7
BASENJISCAFF0346	7690	97	99.2196	99.896	7682	241	4	0.5078	0.7414	2.9	36.05	60.31	BASENJISCAFF0664	BASENJISCAFF0299	93.81	2016.07	KEEP	0	0	2	803.124	5	108787	0.51678	53.6404	0	0	FALSE	FALSE	-1	-1	0	0	0	0	0	0	BASPBJ0474_pilon (Unplaced) Diploidocus:PRIMARY|PRIMARY|PRIMARY|PRIMARY|PRIMARY|PRIMARY	GOOD|EXS|REPT|NON|ALT|NONE	GOOD|HAP|REPT|TOP|REP|NONE	GOOD|EXS|REPT|TOP|REP|NONE	PRIMARY	PRIMARY	PRIMARY	keep	7
BASENJISCAFF0347	4974	88	114.721	100	4974	158	215	0.55	22.78	8.625	14.25	54.34	BASENJICHR35.02	BASENJISCAFF0320	81.83	212.24	KEEP	0	0	2	78.4448	1171	15672.3	0.54544	63.5408	0	0	FALSE	FALSE	-1	-1	0	0	0	0	0	0	BASPBJ0475_pilon (Unplaced) Diploidocus:COLLAPSED|COLLAPSED|COLLAPSED|COLLAPSED|COLLAPSED|COLLAPSED	GOOD|EXS|HOMO|NON|ALT|NONE	GOOD|EXS|REPT|TOP|REP|NONE	GOOD|DIP|REPT|TOP|REP|NONE	COLLAPSED	PRIMARY	PRIMARY	repeat	7
BASENJISCAFF0348	13611	31	28.7833	100	13611	36	58	0.3739	3.387	25.31	71.3	0	BASENJICHR10.02	BASENJICHR3.01	99.62	263.12	REPEAT	0	0	3	3287.52	151	102452	0.3769	95.6791	0	0	FALSE	FALSE	-1	-1	0	0	0	0	0	0	BASPBJ0476_pilon (Unplaced) Diploidocus:PRIMARY|PRIMARY|PRIMARY|PRIMARY|PRIMARY|PRIMARY	GOOD|DIP|REPT|NON|REP|NONE	GOOD|EXS|REPT|TOP|ALT|NONE	PURE|DIP|UNIQ|SEC|PRI|COMP|+VEC	PRIMARY	PRIMARY	PRIMARY	keep	7
BASENJISCAFF0349	1908	21	21.1127	100	1908	22	20	0.5041	0	100	0	0	BASENJISCAFF0748	BASENJISCAFF0405	85.8	292.03	KEEP	0	1	1	268.705	0	66438.3	0.51782	48.831	0	0	FALSE	FALSE	-1	-1	0	0	0	0	0	0	BASPBJ0478_pilon (Unplaced)	PURE|HAP|REPT|SEC|PRI|NONE	WEAK|LOW|REPT|TOP|REP|NONE	PURE|HAP|HOMO|SEC|PRI|NONE	HPURGE	PRIMARY	HPURGE	quarantine	1
BASENJISCAFF0350	13548	83	76.5827	100	13548	10	203	0.5095	0.03	2.864	36.63	60.48	BASENJISCAFF0473	BASENJISCAFF0135	98.72	3313.72	REPEAT	0	0	1573	1604.27	174706	222202	0.52185	82.8798	0	0	FALSE	FALSE	-1	-1	0	0	0	0	0	0	BASPBJ0480_pilon (Unplaced) Diploidocus:PRIMARY|PRIMARY|PRIMARY|PRIMARY|PRIMARY|PRIMARY	GOOD|EXS|REPT|NON|REP|NONE	GOOD|EXS|REPT|TOP|REP|NONE	WEAK|HAP|REPT|TOP|REP|NONE	PRIMARY	PRIMARY	KEEP	keep	7
BASENJISCAFF0351	469	4	3.8934	98.9339	464	0	5	0.5198	100	0	0	0	-	-	0	0	JUNK	0	0	1	60.7923	0	13207.8	0.53518	33.6343	0	0	FALSE	FALSE	-1	-1	0	0	0	0	0	0	BASPBJ0481_pilon (Unplaced)	PURE|LOW|UNIQ|NON|PRI|NONE	-	-	LOWQUAL	-	-	quarantine	1
BASENJISCAFF0352	1035	21	18.6444	100	1035	28	0	0.5127	0.87	99.13	0	0	BASENJISCAFF0833	BASENJISCAFF0057	45.41	74.11	KEEP	2	0	6	646.224	93	159541	0.52271	60.0595	0	0	FALSE	FALSE	-1	-1	0	0	0	0	0	0	BASPBJ0482_pilon (Unplaced)	PURE|HAP|PART|TOP|REP|NONE	WEAK|DIP|REPT|TOP|REP|NONE	PURE|HAP|PART|SEC|REP|NONE	HPURGE	PRIMARY	HPURGE	quarantine	1
BASENJISCAFF0353	1371	26	25.6747	99.9271	1370	35	29	0.5809	28.01	21.59	50.4	0	BASENJICHR19.01	BASENJICHR8.01	46.17	335.59	KEEP	0	0	1	3.61413	243	1200.57	0.59373	53.4573	0	0	FALSE	FALSE	-1	-1	0	0	0	0	0	0	BASPBJ0483_pilon (Unplaced) Diploidocus:PRIMARY|PRIMARY|PRIMARY|PRIMARY|PRIMARY|PRIMARY	GOOD|DIP|PART|NON|PRI|NONE	PURE|DIP|UNIQ|TOP|PRI|COMP	PURE|DIP|UNIQ|TOP|PRI|COMP|+VEC	PRIMARY	PRIMARY	PRIMARY	keep	7
BASENJISCAFF0354	30277	168	176.753	99.9967	30276	427	445	0.5512	0.0993	0.026	20.43	79.45	BASENJICHR35.02	BASENJICHR1.02	96.8	883.47	REPEAT	0	0	1	84.354	10	9573.36	0.5634	53.747	0	0	FALSE	FALSE	-1	-1	0	0	0	0	0	0	BASPBJ0484_pilon (Unplaced) Diploidocus:COLLAPSED|PRIMARY|PRIMARY|COLLAPSED|PRIMARY|PRIMARY	GOOD|EXS|REPT|NON|PRI|NONE	GOOD|EXS|REPT|TOP|REP|NONE	WEAK|DIP|REPT|TOP|REP|NONE	PRIMARY	PRIMARY	PRIMARY	keep	7
BASENJISCAFF0355	1647	11	10.1828	100	1647	2	14	0.5151	6.315	93.69	0	0	BASENJISCAFF0473	BASENJISCAFF0644	89.5	2208.74	KEEP	0	0	1	455.271	0	62817.9	0.5258	47.1931	0	0	FALSE	FALSE	-1	-1	0	0	0	0	0	0	BASPBJ0485_pilon (Unplaced)	PURE|HAP|REPT|NON|PRI|NONE	GOOD|EXS|REPT|TOP|REP|NONE	PURE|DIP|UNIQ|TOP|PRI|NONE	HPURGE	PRIMARY	PRIMARY	quarantine	1
BASENJISCAFF0356	2331	6	6.2647	100	2331	1	8	0.5037	76.02	23.98	0	0	BASENJISCAFF0833	BASENJISCAFF0626	42.69	87.26	KEEP	0	1	885	1345.75	345803	360380	0.50837	96.1822	0	0	FALSE	FALSE	-1	-1	0	0	0	0	0	0	BASPBJ0486_pilon (Unplaced)	GOOD|LOW|PART|SEC|REP|NONE	WEAK|DIP|REPT|TOP|REP|NONE	PURE|HAP|REPT|SEC|REP|NONE	HPURGE	PRIMARY	HPURGE	quarantine	1
BASENJISCAFF0357	841	28	25.2759	96.4328	811	14	26	0.5458	13.32	25.56	61.12	0	BASENJISCAFF0663	BASENJISCAFF0613	64.33	90.96	KEEP	0	0	1	30.2024	154	5857.74	0.56243	61.8405	0	0	FALSE	FALSE	-1	-1	0	0	0	0	0	0	BASPBJ0487_pilon (Unplaced) Diploidocus:PRIMARY|PRIMARY|PRIMARY|PRIMARY|PRIMARY|PRIMARY	GOOD|DIP|HOMO|NON|PRI|NONE	PURE|DIP|UNIQ|TOP|REP|NONE	PURE|DIP|UNIQ|SEC|REP|NONE	PRIMARY	PRIMARY	PRIMARY	keep	7
BASENJISCAFF0358	1714	4	4.5683	100	1714	4	4	0.5451	100	0	0	0	-	-	0	0	JUNK	0	0	1	2.01185	0	198.833	0.54259	23.6374	0	0	FALSE	FALSE	-1	-1	0	0	0	0	0	0	BASPBJ0488_pilon (Unplaced)	PURE|LOW|UNIQ|NON|PRI|NONE	-	-	HPURGE	-	-	quarantine	1
BASENJISCAFF0359	4631	16	14.8253	100	4631	10	13	0.5099	0.281	99.72	0	0	BASENJISCAFF0664	BASENJISCAFF0473	61.37	175.04	KEEP	0	0	1679	1781.42	181671	217151	0.51112	96.5907	0	0	FALSE	FALSE	-1	-1	0	0	0	0	0	0	BASPBJ0489_pilon (Unplaced)	PURE|HAP|HOMO|NON|REP|NONE	GOOD|HAP|REPT|TOP|REP|NONE	GOOD|EXS|REPT|TOP|REP|NONE	HPURGE	PRIMARY	PRIMARY	quarantine	1
BASENJISCAFF0360	3541	59	60.8509	100	3541	77	60	0.5473	0	5.959	50.24	43.8	BASENJICHR35.02	BASENJISCAFF0393	97.74	249.2	HAPLOTIG	0	0	4	126.535	1876	23205.2	0.57159	98.8051	0	0	FALSE	FALSE	-1	-1	0	0	0	0	0	0	BASPBJ0490_pilon (Unplaced) Diploidocus:PRIMARY|PRIMARY|PRIMARY|PRIMARY|PRIMARY|PRIMARY	GOOD|DIP|HOMO|NON|REP|NONE	GOOD|EXS|REPT|TOP|REP|NONE	GOOD|DIP|UNIQ|SEC|PRI|NONE	PRIMARY	PRIMARY	PRIMARY	keep	7
BASENJISCAFF0361	800	5	3.86	100	800	3	4	0.5577	100	0	0	0	-	-	0	0	JUNK	0	0	1	14.6576	0	2664.17	0.55625	35.1421	0	0	FALSE	FALSE	-1	-1	0	0	0	0	0	0	BASPBJ0491_pilon (Unplaced)	PURE|LOW|UNIQ|NON|PRI|NONE	-	-	HPURGE	-	-	quarantine	1
BASENJISCAFF0362	16782	30	30.0022	100	16782	41	46	0.5087	0	20.74	79.26	0	BASENJISCAFF0150	BASENJISCAFF0325	99.85	883.83	REPEAT	0	0	1657	1649.84	199114	234045	0.50846	99.8031	0	0	FALSE	FALSE	-1	-1	0	0	0	0	0	0	BASPBJ0492_pilon (Unplaced) Diploidocus:PRIMARY|PRIMARY|PRIMARY|PRIMARY|PRIMARY|PRIMARY	GOOD|DIP|REPT|NON|REP|NONE	PURE|DIP|UNIQ|TOP|REP|NONE	GOOD|EXS|REPT|TOP|REP|NONE	PRIMARY	PRIMARY	PRIMARY	keep	7
BASENJISCAFF0363	923	1	1.8516	99.8917	922	2	1	0.5576	100	0	0	0	-	-	0	0	JUNK	0	0	1	6.43701	0	1158.3	0.56446	22.1851	0	0	FALSE	FALSE	-1	-1	0	0	0	0	0	0	BASPBJ0493_pilon (Unplaced)	LOWX|LOW|UNIQ|NON|PRI|NONE	-	-	LOWCOV	-	-	junk	1
BASENJISCAFF0364	725	18	16.7655	100	725	13	10	0.5521	1.793	98.21	0	0	BASENJISCAFF0513	BASENJISCAFF0483	92.83	208.14	KEEP	0	0	3	86.3548	1203	13939.1	0.55586	91.7024	0	0	FALSE	FALSE	-1	-1	0	0	0	0	0	0	BASPBJ0495_pilon (Unplaced)	PURE|HAP|HOMO|NON|REP|NONE	GOOD|EXS|REPT|TOP|REP|NONE	GOOD|HAP|REPT|SEC|PRI|NONE	HPURGE	COLLAPSED	KEEP	quarantine	1
BASENJISCAFF0365	2470	24	24.4834	100	2470	4	40	0.5075	1.417	51.01	47.57	0	BASENJISCAFF0707	BASENJICHR28.01	65.79	77.69	KEEP	0	0	49	704.238	2780	203966	0.51134	71.1948	0	0	FALSE	FALSE	-1	-1	0	0	0	0	0	0	BASPBJ0496_pilon (Unplaced) Diploidocus:PRIMARY|PRIMARY|PRIMARY|PRIMARY|PRIMARY|PRIMARY	GOOD|HAP|HOMO|NON|REP|NONE	PURE|DIP|UNIQ|TOP|REP|NONE	PURE|DIP|UNIQ|TOP|PRI|COMP	PRIMARY	PRIMARY	PRIMARY	keep	7
BASENJISCAFF0366	3904	84	82.1563	99.7695	3895	98	83	0.5506	0.3333	26.02	19.29	54.35	BASENJISCAFF0890	BASENJICHR35.02	63.93	123.98	KEEP	0	0	2	100.271	653	17035.6	0.56583	55.0799	0	0	FALSE	FALSE	-1	-1	0	0	0	0	0	0	BASPBJ0497_pilon (Unplaced) Diploidocus:PRIMARY|PRIMARY|COLLAPSED|PRIMARY|COLLAPSED|COLLAPSED	GOOD|EXS|HOMO|NON|ALT|NONE	GOOD|DIP|REPT|TOP|REP|NONE	GOOD|EXS|REPT|TOP|REP|NONE	COLLAPSED	PRIMARY	PRIMARY	repeat	7
BASENJISCAFF0367	670	1	0.994	99.403	666	0	1	0.4037	100	0	0	0	-	-	0	0	JUNK	0	0	1	2.16149	0	59.5683	0.38209	23.6025	0	0	FALSE	FALSE	-1	-1	0	0	0	0	0	0	BASPBJ0498_pilon (Unplaced)	LOWX|LOW|UNIQ|NON|PRI|NONE	-	-	LOWCOV	-	-	junk	1
BASENJISCAFF0368	3800	78	65.4953	100	3800	60	81	0.5451	0	18.18	8.605	73.21	BASENJICHR35.02	BASENJICHR1.02	81.79	462.61	KEEP	0	0	4	135.706	1503	20263	0.54921	87.6259	0	0	FALSE	FALSE	-1	-1	0	0	0	0	0	0	BASPBJ0500_pilon (Unplaced) Diploidocus:COLLAPSED|COLLAPSED|COLLAPSED|COLLAPSED|COLLAPSED|COLLAPSED	GOOD|EXS|REPT|NON|REP|NONE	GOOD|EXS|REPT|TOP|REP|NONE	WEAK|DIP|REPT|TOP|REP|NONE	COLLAPSED	PRIMARY	PRIMARY	repeat	7
BASENJISCAFF0369	1998	17	18.02	100	1998	17	16	0.5088	9.159	65.12	25.73	0	BASENJISCAFF1053	BASENJISCAFF0190	92.49	373.17	KEEP	0	1	548	877.86	278304	268522	0.51401	91.2272	0	0	FALSE	FALSE	-1	-1	0	0	0	0	0	0	BASPBJ0501_pilon (Unplaced) Diploidocus:PRIMARY|PRIMARY|PRIMARY|PRIMARY|PRIMARY|PRIMARY	GOOD|HAP|REPT|SEC|REP|NONE	GOOD|EXS|REPT|TOP|REP|NONE	WEAK|EXS|REPT|TOP|REP|NONE	PRIMARY	PRIMARY	PRIMARY	keep	7
BASENJISCAFF0370	25611	51	50.9284	100	25611	86	89	0.5081	0	4.685	95.26	0.059	-	-	0	0	KEEP	1	1	1855	2259.45	214662	282823	0.51451	98.972	0	0	FALSE	FALSE	-1	-1	0	0	0	0	0	0	BASPBJ0502_pilon (Unplaced) Diploidocus:PRIMARY|PRIMARY|PRIMARY|PRIMARY|PRIMARY|PRIMARY	PURE|DIP|UNIQ|TOP|REP|NONE	-	-	PRIMARY	-	-	keep	7
BASENJISCAFF0371	790	47	46.8899	100	790	42	21	0.5079	0	0.759	99.24	0	-	-	0	0	KEEP	1	0	3	450.483	229	111887	0.51266	65.1833	0	0	FALSE	FALSE	-1	-1	0	0	0	0	0	0	BASPBJ0503_pilon (Unplaced) Diploidocus:PRIMARY|PRIMARY|PRIMARY|PRIMARY|PRIMARY|PRIMARY	PURE|DIP|UNIQ|TOP|REP|NONE	-	-	PRIMARY	-	-	keep	7
BASENJISCAFF0372	570	2	1.9193	100	570	2	1	0.5597	100	0	0	0	-	-	0	0	JUNK	0	0	1	7.43934	0	1293.79	0.55965	18.75	0	0	FALSE	FALSE	-1	-1	0	0	0	0	0	0	BASPBJ0504_pilon (Unplaced)	LOWX|LOW|UNIQ|NON|PRI|NONE	-	-	LOWCOV	-	-	junk	1
BASENJISCAFF0373	2350	30	27.9817	100	2350	42	19	0.5466	2.596	32.72	64.68	0	BASENJICHR35.02	BASENJICHR1.02	82.81	228.77	KEEP	0	0	1	69.0688	385	13173.3	0.56638	68.3305	0	0	FALSE	FALSE	-1	-1	0	0	0	0	0	0	BASPBJ0505_pilon (Unplaced) Diploidocus:PRIMARY|PRIMARY|PRIMARY|PRIMARY|PRIMARY|PRIMARY	GOOD|DIP|HOMO|NON|PRI|NONE	GOOD|EXS|REPT|TOP|REP|NONE	WEAK|DIP|REPT|TOP|REP|NONE	PRIMARY	PRIMARY	PRIMARY	keep	7
BASENJISCAFF0374	844	9	9.4893	100	844	5	13	0.5409	28.32	71.68	0	0	BASENJISCAFF0924	BASENJISCAFF0340	73.34	139.81	KEEP	0	0	1	53.8105	0	10091.8	0.54976	34.2298	0	0	FALSE	FALSE	-1	-1	0	0	0	0	0	0	BASPBJ0506_pilon (Unplaced)	GOOD|HAP|HOMO|NON|PRI|NONE	PURE|HAP|REPT|TOP|ALT|NONE	PURE|DIP|UNIQ|TOP|PRI|NONE	HPURGE	HPURGE	PRIMARY	quarantine	1
BASENJISCAFF0375	7285	0	0.1407	14.07	1025	1	0	0.5476	100	0	0	0	-	-	0	0	JUNK	0	0	1	1.23392	0	18.2203	0.63322	10.8279	0	0	FALSE	FALSE	-1	-1	0	0	0	0	0	0	BASPBJ0508_pilon (Unplaced)	LOWX|LOW|UNIQ|NON|PRI|NONE	-	-	LOWCOV	-	-	junk	1
BASENJISCAFF0376	1003	1	0.5583	55.8325	560	0	1	0.487	100	0	0	0	-	-	0	0	JUNK	0	0	1	8.06039	0	1224.32	0.52243	13.4084	0	0	FALSE	FALSE	-1	-1	0	0	0	0	0	0	BASPBJ0509_pilon (Unplaced)	LOWX|LOW|UNIQ|NON|PRI|NONE	-	-	LOWCOV	-	-	junk	1
BASENJISCAFF0377	3016	148	144.513	100	3016	113	127	0.5473	0	0	2.984	97.02	-	-	0	0	JUNK	0	0	4	116.48	2084	23182.8	0.56631	99.1973	0	0	FALSE	FALSE	-1	-1	0	0	0	0	0	0	BASPBJ0511_pilon (Unplaced) Diploidocus:COLLAPSED|COLLAPSED|COLLAPSED|COLLAPSED|COLLAPSED|COLLAPSED	PURE|EXS|UNIQ|NON|REP|NONE	-	-	COLLAPSED	-	-	repeat	7
BASENJISCAFF0378	261	1	0.9962	99.6169	260	1	0	0.4875	100	0	0	0	-	-	0	0	JUNK	0	0	1	583.426	3	68402.5	0.50575	54.8936	0	0	FALSE	FALSE	-1	-1	0	0	0	0	0	0	BASPBJ0512_pilon (Unplaced)	LOWX|LOW|UNIQ|NON|PRI|NONE	-	-	LOWCOV	-	-	junk	1
BASENJISCAFF0379	1834	1	0.7443	74.4275	1365	1	0	0.5642	100	0	0	0	-	-	0	0	JUNK	0	0	1	8.56471	0	1612.85	0.5687	13.4956	0	0	FALSE	FALSE	-1	-1	0	0	0	0	0	0	BASPBJ0514_pilon (Unplaced)	LOWX|LOW|UNIQ|NON|PRI|NONE	-	-	LOWCOV	-	-	junk	1
BASENJISCAFF0380	867	2	2.4198	99.4233	862	0	3	0.3846	100	0	0	0	-	-	0	0	JUNK	0	0	3	912.449	41	39590.8	0.37024	58.0262	0	0	FALSE	FALSE	-1	-1	0	0	0	0	0	0	BASPBJ0515_pilon (Unplaced)	LOWX|LOW|UNIQ|NON|REP|NONE	-	-	LOWCOV	-	-	junk	1
BASENJISCAFF0381	3379	124	124.962	100	3379	9	218	0.5091	0	0.059	10.45	89.49	-	-	0	0	JUNK	0	0	10	1004.36	604	140271	0.5182	67.4918	0	0	FALSE	FALSE	-1	-1	0	0	0	0	0	0	BASPBJ0516_pilon (Unplaced) Diploidocus:COLLAPSED|COLLAPSED|COLLAPSED|COLLAPSED|COLLAPSED|COLLAPSED	PURE|EXS|UNIQ|NON|REP|NONE	-	-	COLLAPSED	-	-	repeat	7
BASENJISCAFF0382	2689	34	31.4808	100	2689	33	33	0.5507	0	29.04	70.96	0	BASENJICHR35.02	BASENJICHR1.02	89.03	640.68	KEEP	0	3	4	112.202	1574	19187.7	0.56527	100	0	0	FALSE	FALSE	-1	-1	0	0	0	0	0	0	BASPBJ0517_pilon (Unplaced) Diploidocus:PRIMARY|PRIMARY|PRIMARY|PRIMARY|PRIMARY|PRIMARY	GOOD|DIP|REPT|SEC|REP|NONE	GOOD|EXS|REPT|TOP|REP|NONE	WEAK|DIP|REPT|TOP|REP|NONE	PRIMARY	PRIMARY	PRIMARY	keep	7
BASENJISCAFF0383	1901	14	13.5029	100	1901	0	28	0.5153	29.62	67.6	2.788	0	BASENJISCAFF0664	BASENJISCAFF0848	89.48	320.57	KEEP	0	0	9	1089.22	429	137553	0.52709	69.9733	0	0	FALSE	FALSE	-1	-1	0	0	0	0	0	0	BASPBJ0518_pilon (Unplaced)	GOOD|HAP|REPT|NON|REP|NONE	GOOD|HAP|REPT|TOP|REP|NONE	PURE|DIP|UNIQ|SEC|PRI|NONE	HPURGE	PRIMARY	PRIMARY	quarantine	1
BASENJISCAFF0384	4067	7	7.4507	99.9262	4064	16	3	0.5465	57.17	42.83	0	0	BASENJICHR35.02	BASENJISCAFF0053	83.55	122.82	KEEP	0	0	1	20.4407	0	3636.01	0.55594	34.2737	0	0	FALSE	FALSE	-1	-1	0	0	0	0	0	0	BASPBJ0519_pilon (Unplaced)	GOOD|LOW|HOMO|NON|PRI|NONE	GOOD|EXS|REPT|TOP|REP|NONE	WEAK|EXS|REPT|TOP|ALT|NONE	HPURGE	PRIMARY	PRIMARY	quarantine	1
BASENJISCAFF0385	1066	6	5.469	100	1066	2	6	0.3862	77.77	22.23	0	0	BASENJISCAFF0333	-	8.16	8.16	KEEP	1	0	47	2543.43	1602	103399	0.39962	68.4615	0	0	FALSE	FALSE	-1	-1	0	0	0	0	0	0	BASPBJ0520_pilon (Unplaced)	GOOD|LOW|PART|TOP|REP|NONE	GOOD|HAP|PART|TOP|REP|NONE	-	HPURGE	HPURGE	-	quarantine	1
BASENJISCAFF0386	1792	20	18.8823	100	1792	28	5	0.5111	0.167	99.83	0	0	BASENJISCAFF0269	BASENJISCAFF0070	74.72	316.35	KEEP	0	0	3	878.24	14	109047	0.50781	55.4926	0	0	FALSE	FALSE	-1	-1	0	0	0	0	0	0	BASPBJ0521_pilon (Unplaced)	PURE|HAP|REPT|NON|REP|NONE	WEAK|EXS|REPT|TOP|REP|NONE	GOOD|DIP|REPT|TOP|REP|NONE	HPURGE	PRIMARY	PRIMARY	quarantine	1
BASENJISCAFF0387	1167	7	6.6641	99.9143	1166	6	5	0.5129	59.98	40.02	0	0	BASENJISCAFF0664	BASENJISCAFF1069	95.03	155.44	KEEP	0	0	1720	1741.23	190612	204987	0.51757	87.8177	0	0	FALSE	FALSE	-1	-1	0	0	0	0	0	0	BASPBJ0522_pilon (Unplaced)	GOOD|LOW|HOMO|NON|REP|NONE	GOOD|HAP|REPT|TOP|REP|NONE	PURE|DIP|UNIQ|TOP|REP|NONE	HPURGE	PRIMARY	PRIMARY	quarantine	1
BASENJISCAFF0388	1959	1	1.1343	87.953	1723	1	2	0.5683	100	0	0	0	-	-	0	0	JUNK	0	0	1	24.5866	0	3455.7	0.57172	29.2292	0	0	FALSE	FALSE	-1	-1	0	0	0	0	0	0	BASPBJ0524_pilon (Unplaced)	LOWX|LOW|UNIQ|NON|PRI|NONE	-	-	LOWCOV	-	-	junk	1
BASENJISCAFF0389	4637	67	57.9485	82.424	3822	86	80	0.5563	18.09	16.61	16.02	49.28	BASENJICHR35.02	BASENJISCAFF0338	60.69	200.65	KEEP	0	1	3	107.525	1355	18663.5	0.56588	75.1464	0	0	FALSE	FALSE	-1	-1	0	0	0	0	0	0	BASPBJ0525_pilon (Unplaced) Diploidocus:COLLAPSED|COLLAPSED|KEEP|KEEP|KEEP|KEEP	WEAK|EXS|HOMO|SEC|REP|NONE	GOOD|EXS|REPT|TOP|REP|NONE	PURE|DIP|UNIQ|SEC|REP|NONE	KEEP	PRIMARY	PRIMARY	keep	7
BASENJISCAFF0390	4321	22	20.2342	100	4321	43	5	0.5131	0.023	85.07	14.9	0	BASENJISCAFF0135	BASENJISCAFF0884	95.39	500.07	REPEAT	0	0	1	718.652	3	95640	0.52048	53.8999	0	0	FALSE	FALSE	-1	-1	0	0	0	0	0	0	BASPBJ0526_pilon (Unplaced) Diploidocus:PRIMARY	PURE|HAP|REPT|NON|PRI|NONE	WEAK|HAP|REPT|TOP|REP|NONE	GOOD|EXS|REPT|TOP|REP|NONE	HPURGE	KEEP	PRIMARY	quarantine	2
BASENJISCAFF0391	1598	3	3.2034	100	1598	5	1	0.5522	100	0	0	0	-	-	0	0	JUNK	0	0	1	41.1749	0	6935.11	0.55444	45.6107	0	0	FALSE	FALSE	-1	-1	0	0	0	0	0	0	BASPBJ0528_pilon (Unplaced)	PURE|LOW|UNIQ|NON|PRI|NONE	-	-	HPURGE	-	-	quarantine	1
BASENJISCAFF0392	1176	40	31.5009	77.1259	907	30	20	0.5621	23.13	0.425	76.45	0	-	-	0	0	KEEP	1	0	5	80.4817	1736	15359.3	0.56293	77.1304	0	0	FALSE	FALSE	-1	-1	0	0	0	0	0	0	BASPBJ0529_pilon (Unplaced) Diploidocus:PRIMARY|PRIMARY|PRIMARY|PRIMARY|PRIMARY|PRIMARY	GOOD|DIP|UNIQ|TOP|REP|NONE	-	-	PRIMARY	-	-	keep	7
BASENJISCAFF0393	3949	43	32.4112	67.0803	2649	39	48	0.5459	32.94	0.05098	67	0	-	-	0	0	KEEP	0	1	1	78.1216	233	13938.5	0.55913	68.9523	0	0	FALSE	FALSE	-1	-1	0	0	0	0	0	0	BASPBJ0530_pilon (Unplaced) Diploidocus:PRIMARY|PRIMARY|PRIMARY|PRIMARY|PRIMARY|PRIMARY	GOOD|DIP|UNIQ|SEC|PRI|NONE	-	-	PRIMARY	-	-	keep	7
BASENJISCAFF0394	512	1	0.9199	91.9922	471	0	1	0.5164	100	0	0	0	-	-	0	0	JUNK	0	0	1	46.4794	0	16200.2	0.5	25.1029	0	0	FALSE	FALSE	-1	-1	0	0	0	0	0	0	BASPBJ0531_pilon (Unplaced)	LOWX|LOW|UNIQ|NON|PRI|NONE	-	-	LOWCOV	-	-	junk	1
BASENJISCAFF0395	21800	9	10.547	95.8119	20887	26	26	0.5097	45.16	50.33	4.509	0	BASENJISCAFF0135	BASENJISCAFF0102	37.34	128.48	KEEP	0	0	2198	2566.82	225185	320197	0.51321	98.5763	0	0	FALSE	FALSE	-1	-1	0	0	0	0	0	0	BASPBJ0533_pilon (Unplaced)	GOOD|HAP|PART|NON|REP|NONE	WEAK|LOW|REPT|TOP|REP|NONE	GOOD|DIP|REPT|TOP|REP|NONE	HPURGE	KEEP	PRIMARY	quarantine	1
BASENJISCAFF0396	1262	4	3.4168	100	1262	2	3	0.5495	100	0	0	0	-	-	0	0	JUNK	0	0	1	177.396	0	5407.1	0.56656	31.7152	0	0	FALSE	FALSE	-1	-1	0	0	0	0	0	0	BASPBJ0534_pilon (Unplaced)	PURE|LOW|UNIQ|NON|PRI|NONE	-	-	HPURGE	-	-	quarantine	1
BASENJISCAFF0397	8472	1	0.6655	66.5486	5638	1	0	0.3675	100	0	0	0	-	-	0	0	JUNK	0	0	1	64.3085	0	1868.79	0.37878	14.6815	0	0	FALSE	FALSE	-1	-1	0	0	0	0	0	0	BASPBJ0535_pilon (Unplaced)	LOWX|LOW|UNIQ|NON|PRI|NONE	-	-	LOWCOV	-	-	junk	1
BASENJISCAFF0398	630	2	2.3841	100	630	0	3	0.4837	100	0	0	0	-	-	0	0	JUNK	0	0	1	115.149	0	34710.6	0.51429	49.1722	0	0	FALSE	FALSE	-1	-1	0	0	0	0	0	0	BASPBJ0536_pilon (Unplaced)	LOWX|LOW|UNIQ|NON|PRI|NONE	-	-	LOWCOV	-	-	junk	1
BASENJISCAFF0399	318	9	8.305	100	318	0	9	0.5051	11.64	88.37	0	0	BASENJISCAFF0341	BASENJISCAFF0644	100	134.28	KEEP	0	0	1	144.712	0	23097.2	0.51258	32.8767	0	0	FALSE	FALSE	-1	-1	0	0	0	0	0	0	BASPBJ0537_pilon (Unplaced)	PURE|HAP|HOMO|NON|PRI|NONE	PURE|DIP|UNIQ|TOP|REP|NONE	PURE|DIP|UNIQ|TOP|PRI|NONE	LOWQUAL	PRIMARY	PRIMARY	quarantine	1
BASENJISCAFF0400	2883	71	71.6282	100	2883	137	1	0.5089	1.283	7.284	38.92	52.52	BASENJISCAFF0284	BASENJISCAFF0487	47.17	140.55	KEEP	0	0	645	1049	286287	303095	0.51613	91.3546	0	0	FALSE	FALSE	-1	-1	0	0	0	0	0	0	BASPBJ0538_pilon (Unplaced) Diploidocus:PRIMARY|PRIMARY|PRIMARY|PRIMARY|PRIMARY|PRIMARY	GOOD|EXS|PART|NON|REP|NONE	GOOD|EXS|HOMO|TOP|REP|NONE	PURE|DIP|UNIQ|TOP|REP|NONE	PRIMARY	PRIMARY	PRIMARY	keep	7
BASENJISCAFF0401	681	43	37.7181	100	681	43	6	0.5034	0	10.28	89.72	0	-	-	0	0	KEEP	0	0	1	205.76	0	62539.9	0.5022	41.6794	0	0	FALSE	FALSE	-1	-1	0	0	0	0	0	0	BASPBJ0539_pilon (Unplaced) Diploidocus:PRIMARY|PRIMARY|PRIMARY|PRIMARY|PRIMARY|PRIMARY	PURE|DIP|UNIQ|NON|PRI|NONE	-	-	PRIMARY	-	-	keep	7
BASENJISCAFF0402	1094	23	22.489	100	1094	12	22	0.55	0	68.28	31.72	0	BASENJICHR35.02	BASENJISCAFF0819	80.53	214.63	KEEP	0	0	1	44.6573	1	8306.97	0.55759	50.7491	0	0	FALSE	FALSE	-1	-1	0	0	0	0	0	0	BASPBJ0540_pilon (Unplaced) Diploidocus:PRIMARY|PRIMARY|PRIMARY|PRIMARY|PRIMARY|PRIMARY	GOOD|HAP|HOMO|NON|PRI|NONE	GOOD|EXS|REPT|TOP|REP|NONE	WEAK|DIP|HOMO|SEC|PRI|NONE	PRIMARY	PRIMARY	PRIMARY	keep	7
BASENJISCAFF0403	2616	13	13.4981	100	2616	10	18	0.5501	5.237	94.76	0	0	BASENJICHR35.02	BASENJICHR38.01	72.32	240.48	KEEP	0	0	2	93.7297	565	16630.6	0.56843	88.2626	0	0	FALSE	FALSE	-1	-1	0	0	0	0	0	0	BASPBJ0541_pilon (Unplaced)	PURE|HAP|HOMO|NON|ALT|NONE	GOOD|EXS|REPT|TOP|REP|NONE	PURE|DIP|UNIQ|TOP|PRI|COMP	HPURGE	PRIMARY	PRIMARY	quarantine	1
BASENJISCAFF0404	5486	54	53.3177	100	5486	65	63	0.5075	0.784	15.51	48.8	34.91	BASENJISCAFF0572	BASENJISCAFF0284	94.31	808.77	KEEP	0	1	737	1163.76	321923	336522	0.50948	98.3333	0	0	FALSE	FALSE	-1	-1	0	0	0	0	0	0	BASPBJ0542_pilon (Unplaced) Diploidocus:PRIMARY|PRIMARY|PRIMARY|PRIMARY|PRIMARY|PRIMARY	WEAK|DIP|REPT|SEC|REP|NONE	GOOD|DIP|REPT|TOP|REP|NONE	GOOD|EXS|HOMO|TOP|REP|NONE	PRIMARY	PRIMARY	PRIMARY	keep	7
BASENJISCAFF0405	5232	11	11.625	100	5232	19	8	0.5061	1.835	98.17	0	0	BASENJISCAFF0418	BASENJISCAFF0349	52.35	83.33	KEEP	0	1	1	279.929	0	73363.9	0.51567	42.0476	0	0	FALSE	FALSE	-1	-1	0	0	0	0	0	0	BASPBJ0543_pilon (Unplaced)	PURE|HAP|HOMO|SEC|PRI|NONE	GOOD|EXS|REPT|TOP|REP|NONE	PURE|HAP|REPT|SEC|PRI|NONE	HPURGE	PRIMARY	HPURGE	quarantine	1
BASENJISCAFF0406	1216	1	0.9926	99.2599	1207	1	0	0.3183	100	0	0	0	-	-	0	0	JUNK	0	0	1	6.64538	0	194.043	0.32977	12.2689	0	0	FALSE	FALSE	-1	-1	0	0	0	0	0	0	BASPBJ0545_pilon (Unplaced)	LOWX|LOW|UNIQ|NON|PRI|NONE	-	-	LOWCOV	-	-	junk	1
BASENJISCAFF0407	3970	32	31.071	99.9748	3969	63	1	0.5093	0.02519	23.65	76.32	0	BASENJISCAFF0473	BASENJISCAFF0269	97.98	5264.31	REPEAT	0	0	1533	1582.21	174432	219931	0.51511	86.5872	0	0	FALSE	FALSE	-1	-1	0	0	0	0	0	0	BASPBJ0546_pilon (Unplaced) Diploidocus:PRIMARY|PRIMARY|PRIMARY|PRIMARY|PRIMARY|PRIMARY	GOOD|DIP|REPT|NON|REP|NONE	GOOD|EXS|REPT|TOP|REP|NONE	WEAK|EXS|REPT|TOP|REP|NONE	PRIMARY	PRIMARY	PRIMARY	keep	7
BASENJISCAFF0408	1010	23	22.1248	100	1010	1	29	0.5143	0.099	98.22	1.683	0	BASENJISCAFF0284	BASENJISCAFF0768	98.61	328.51	REPEAT	0	0	1	171.85	0	52712	0.51881	49.7968	0	0	FALSE	FALSE	-1	-1	0	0	0	0	0	0	BASPBJ0547_pilon (Unplaced)	PURE|HAP|REPT|NON|PRI|NONE	GOOD|EXS|REPT|TOP|REP|NONE	PURE|HAP|HOMO|SEC|REP|NONE	HPURGE	PRIMARY	HPURGE	quarantine	1
BASENJISCAFF0409	838	11	10.5012	100	838	11	4	0.5091	2.745	97.26	0	0	BASENJISCAFF0585	BASENJISCAFF0486	79.36	271.24	KEEP	0	0	733	946.163	292989	257948	0.51313	90.8867	0	0	FALSE	FALSE	-1	-1	0	0	0	0	0	0	BASPBJ0549_pilon (Unplaced)	PURE|HAP|REPT|NON|REP|NONE	WEAK|DIP|REPT|TOP|REP|NONE	GOOD|EXS|REPT|TOP|REP|NONE	HPURGE	PRIMARY	PRIMARY	quarantine	1
BASENJISCAFF0410	1883	10	10.1471	100	1883	9	8	0.5676	4.355	95.65	0	0	BASENJICHR38.01	BASENJICHR19.01	93.89	1097.45	KEEP	0	0	2	65.4373	148	8912.85	0.57196	87.399	0	0	FALSE	FALSE	-1	-1	0	0	0	0	0	0	BASPBJ0550_pilon (Unplaced)	PURE|HAP|REPT|NON|ALT|NONE	PURE|DIP|UNIQ|TOP|PRI|COMP	PURE|DIP|UNIQ|TOP|PRI|COMP	HPURGE	PRIMARY	PRIMARY	quarantine	1
BASENJISCAFF0411	14231	229	211.806	100	14231	194	513	0.5096	0.112	0	0.59	99.3	-	-	0	0	JUNK	0	0	1	262.147	0	76171.9	0.51465	36.1211	0	0	FALSE	FALSE	-1	-1	0	0	0	0	0	0	BASPBJ0551_pilon (Unplaced) Diploidocus:COLLAPSED|COLLAPSED|COLLAPSED|COLLAPSED|COLLAPSED|COLLAPSED	PURE|EXS|UNIQ|NON|PRI|NONE	-	-	COLLAPSED	-	-	repeat	7
BASENJISCAFF0412	1644	6	5.4836	97.6886	1606	10	2	0.5069	68.86	31.14	0	0	BASENJISCAFF0877	BASENJISCAFF0418	55.11	58.88	KEEP	0	0	419	931.274	213333	240275	0.51034	79.6663	0	0	FALSE	FALSE	-1	-1	0	0	0	0	0	0	BASPBJ0552_pilon (Unplaced)	GOOD|LOW|HOMO|NON|REP|NONE	GOOD|HAP|HOMO|TOP|REP|NONE	GOOD|EXS|REPT|TOP|REP|NONE	HPURGE	PRIMARY	PRIMARY	quarantine	1
BASENJISCAFF0413	5459	41	36.5794	99.5237	5433	71	82	0.5479	21.76	0.8788	76.63	0.7325	BASENJICHR35.02	BASENJICHR1.02	89.65	608.57	KEEP	0	1	4	86.6361	1444	15751.9	0.56714	83.0296	0	0	FALSE	FALSE	-1	-1	0	0	0	0	0	0	BASPBJ0553_pilon (Unplaced) Diploidocus:PRIMARY|PRIMARY|PRIMARY|PRIMARY|PRIMARY|PRIMARY	GOOD|DIP|REPT|SEC|REP|NONE	GOOD|EXS|REPT|TOP|REP|NONE	WEAK|DIP|REPT|TOP|REP|NONE	PRIMARY	PRIMARY	PRIMARY	keep	7
BASENJISCAFF0414	22318	68	66.9105	99.9866	22315	94	80	0.5049	0.1214	9.558	40.93	49.39	BASENJICHR10.02	BASENJICHR10.01	97.45	1562.7	REPEAT	0	0	1	621.569	29	17241.9	0.48069	60.5643	0	0	FALSE	FALSE	-1	-1	0	0	0	0	0	0	BASPBJ0554_pilon (Unplaced) Diploidocus:PRIMARY|PRIMARY|PRIMARY|PRIMARY|PRIMARY|PRIMARY	WEAK|EXS|REPT|NON|PRI|NONE	GOOD|EXS|REPT|TOP|ALT|NONE	PURE|DIP|UNIQ|TOP|PRI|COMP|+VEC	PRIMARY	PRIMARY	PRIMARY	keep	7
BASENJISCAFF0415	7750	22	28.9874	99.9871	7749	84	8	0.5108	1.729	55.39	42.88	0	BASENJISCAFF1023	BASENJISCAFF0284	96.83	3580.63	REPEAT	0	0	743	1130.97	335920	326330	0.51871	92.6981	0	0	FALSE	FALSE	-1	-1	0	0	0	0	0	0	BASPBJ0555_pilon (Unplaced) Diploidocus:PRIMARY|PRIMARY|PRIMARY|PRIMARY|PRIMARY|PRIMARY	GOOD|HAP|REPT|NON|REP|NONE	WEAK|HAP|REPT|TOP|REP|NONE	GOOD|EXS|HOMO|TOP|REP|NONE	PRIMARY	PRIMARY	PRIMARY	keep	7
BASENJISCAFF0416	610	2	2.1803	100	610	2	2	0.3645	100	0	0	0	-	-	0	0	JUNK	0	0	1	3.07192	0	1059.23	0.38361	18.4931	0	0	FALSE	FALSE	-1	-1	0	0	0	0	0	0	BASPBJ0556_pilon (Unplaced)	LOWX|LOW|UNIQ|NON|PRI|NONE	-	-	LOWCOV	-	-	junk	1
BASENJISCAFF0417	4209	38	34.029	99.8812	4204	55	53	0.5211	0.808	26.51	72.68	0	BASENJICHR35.02	BASENJICHR1.02	33	122.31	KEEP	0	0	1	203.16	6	13107.1	0.52507	53.6935	0	0	FALSE	FALSE	-1	-1	0	0	0	0	0	0	BASPBJ0557_pilon (Unplaced) Diploidocus:PRIMARY|PRIMARY|PRIMARY|PRIMARY|PRIMARY|PRIMARY	GOOD|DIP|PART|NON|PRI|NONE	GOOD|EXS|REPT|TOP|REP|NONE	WEAK|DIP|REPT|TOP|REP|NONE	PRIMARY	PRIMARY	PRIMARY	keep	7
BASENJISCAFF0418	19486	87	187.974	100	19486	571	365	0.5047	0	10.61	33.45	55.94	BASENJISCAFF0284	BASENJISCAFF0572	99.68	6609.35	REPEAT	0	0	761	1225.64	346471	356213	0.51221	98.1141	0	0	FALSE	FALSE	-1	-1	0	0	0	0	0	0	BASPBJ0559_pilon (Unplaced) Diploidocus:PRIMARY|PRIMARY|PRIMARY|PRIMARY|PRIMARY|PRIMARY	GOOD|EXS|REPT|NON|REP|NONE	GOOD|EXS|HOMO|TOP|REP|NONE	GOOD|DIP|REPT|TOP|REP|NONE	PRIMARY	PRIMARY	PRIMARY	keep	7
BASENJISCAFF0419	8953	73	98.7438	87.1551	7803	162	219	0.3228	29.65	10.79	7.796	51.76	BASENJICHR35.02	BASENJICHR38.01	98.77	2927.22	REPEAT	0	0	5	581.637	684	30967.5	0.31732	57.8134	0	0	FALSE	FALSE	-1	-1	0	0	0	0	0	0	BASPBJ0560_pilon (Unplaced) Diploidocus:COLLAPSED|COLLAPSED|COLLAPSED|COLLAPSED|COLLAPSED|COLLAPSED	GOOD|EXS|REPT|NON|REP|NONE	GOOD|EXS|REPT|TOP|REP|NONE	PURE|DIP|UNIQ|SEC|PRI|COMP	COLLAPSED	PRIMARY	PRIMARY	repeat	7
BASENJISCAFF0420	662	8	6.4456	100	662	0	12	0.3993	42.45	57.55	0	0	-	-	0	0	KEEP	0	0	1	2238.92	0	82608.7	0.39728	45.1258	0	0	FALSE	FALSE	-1	-1	0	0	0	0	0	0	BASPBJ0561_pilon (Unplaced)	GOOD|HAP|UNIQ|NON|PRI|NONE	-	-	HPURGE	-	-	quarantine	1
BASENJISCAFF0421	90581	58	66.3724	100	90581	410	487	0.5087	0.003	4.45	63.44	32.11	BASENJICHR11.02	BASENJISCAFF0572	99.05	929.98	REPEAT	0	0	1845	2161.66	213897	282044	0.51234	99.7537	0	0	FALSE	FALSE	-1	-1	0	0	0	0	0	0	BASPBJ0562_pilon (Unplaced) Diploidocus:PRIMARY|PRIMARY|PRIMARY|PRIMARY|PRIMARY|PRIMARY	GOOD|DIP|REPT|NON|REP|NONE	GOOD|DIP|REPT|TOP|REP|NONE	GOOD|DIP|REPT|TOP|REP|NONE	PRIMARY	PRIMARY	PRIMARY	keep	7
BASENJISCAFF0422	2057	55	44.8775	99.8542	2054	44	39	0.5494	3.014	21.97	68.25	6.757	BASENJISCAFF0061	BASENJISCAFF0556	93.78	106.17	KEEP	2	1	4	112.384	1629	19255.4	0.57754	86.8045	0	0	FALSE	FALSE	-1	-1	0	0	0	0	0	0	BASPBJ0563_pilon (Unplaced) Diploidocus:PRIMARY|PRIMARY|PRIMARY|PRIMARY|PRIMARY|PRIMARY	GOOD|DIP|HOMO|TOP|REP|NONE	WEAK|LOW|HOMO|TOP|PRI|NONE	GOOD|EXS|HOMO|SEC|PRI|NONE	PRIMARY	PRIMARY	PRIMARY	keep	7
BASENJISCAFF0423	2106	38	34.7412	100	2106	27	31	0.5527	10.02	8.927	81.05	0	-	-	0	0	KEEP	0	0	1	76.0832	248	11744.2	0.54938	60.4808	0	0	FALSE	FALSE	-1	-1	0	0	0	0	0	0	BASPBJ0565_pilon (Unplaced) Diploidocus:PRIMARY|PRIMARY|PRIMARY|PRIMARY|PRIMARY|PRIMARY	PURE|DIP|UNIQ|NON|PRI|NONE	-	-	PRIMARY	-	-	keep	7
BASENJISCAFF0424	17080	25	37.2368	99.8009	17046	44	127	0.5453	3.988	46.97	31.26	17.78	BASENJICHR35.02	BASENJICHR1.02	96.42	444.29	REPEAT	0	0	1	18.5689	0	3530.3	0.54268	18.9105	0	0	FALSE	FALSE	-1	-1	0	0	0	0	0	0	BASPBJ0566_pilon (Unplaced) Diploidocus:PRIMARY|PRIMARY|PRIMARY|PRIMARY|PRIMARY|PRIMARY	WEAK|HAP|REPT|NON|PRI|NONE	GOOD|EXS|REPT|TOP|REP|NONE	WEAK|DIP|REPT|TOP|REP|NONE	PRIMARY	PRIMARY	PRIMARY	keep	7
BASENJISCAFF0425	1405	2	2.4356	100	1405	5	0	0.5383	100	0	0	0	-	-	0	0	JUNK	0	0	1	21.9826	0	4104.33	0.5452	25.3082	0	0	FALSE	FALSE	-1	-1	0	0	0	0	0	0	BASPBJ0567_pilon (Unplaced)	LOWX|LOW|UNIQ|NON|PRI|NONE	-	-	LOWCOV	-	-	junk	1
BASENJISCAFF0426	1167	2	2.4533	98.2862	1147	4	2	0.549	100	0	0	0	-	-	0	0	JUNK	0	0	1	20.7047	0	4312.95	0.55356	36.4592	0	0	FALSE	FALSE	-1	-1	0	0	0	0	0	0	BASPBJ0568_pilon (Unplaced)	LOWX|LOW|UNIQ|NON|PRI|NONE	-	-	LOWCOV	-	-	junk	1
BASENJISCAFF0427	19554	18	18.068	100	19554	15	39	0.5072	11.21	72.79	16	0	BASENJISCAFF0418	BASENJISCAFF0585	64.56	340.83	KEEP	1	0	877	1412	344348	374520	0.5088	96.8046	0	0	FALSE	FALSE	-1	-1	0	0	0	0	0	0	BASPBJ0569_pilon (Unplaced)	GOOD|HAP|REPT|TOP|REP|NONE	GOOD|EXS|REPT|TOP|REP|NONE	WEAK|DIP|REPT|TOP|REP|NONE	HPURGE	PRIMARY	PRIMARY	quarantine	1
BASENJISCAFF0428	1645	21	16.0128	76.5957	1260	12	18	0.5459	23.71	72.95	3.343	0	BASENJISCAFF0340	BASENJICHR35.02	49.18	113.92	KEEP	0	0	2	59.6541	444	10283	0.55866	73.1316	0	0	FALSE	FALSE	-1	-1	0	0	0	0	0	0	BASPBJ0570_pilon (Unplaced)	GOOD|HAP|PART|NON|ALT|NONE	PURE|DIP|UNIQ|TOP|PRI|NONE	GOOD|EXS|REPT|TOP|REP|NONE	HPURGE	PRIMARY	PRIMARY	quarantine	1
BASENJISCAFF0429	11351	2	1.9548	100	11351	1	5	0.4735	100	0	0	0	-	-	0	0	JUNK	0	0	1	1271.69	0	36796.6	0.49511	46.3046	0	0	FALSE	FALSE	-1	-1	0	0	0	0	0	0	BASPBJ0571_pilon (Unplaced)	LOWX|LOW|UNIQ|NON|PRI|NONE	-	-	LOWCOV	-	-	junk	1
BASENJISCAFF0430	1129	1	0.6732	67.3162	760	1	0	0.3316	100	0	0	0	-	-	0	0	JUNK	0	0	1	320.629	0	9641.34	0.31887	13.9619	0	0	FALSE	FALSE	-1	-1	0	0	0	0	0	0	BASPBJ0572_pilon (Unplaced)	LOWX|LOW|UNIQ|NON|PRI|NONE	-	-	LOWCOV	-	-	junk	1
BASENJISCAFF0431	846	7	6.7482	98.9362	837	4	6	0.5708	50.12	49.88	0	0	BASENJICHR1.02	BASENJICHR19.01	93.97	167.02	KEEP	0	0	1	18.2732	0	1668.33	0.56501	22.0732	0	0	FALSE	FALSE	-1	-1	0	0	0	0	0	0	BASPBJ0573_pilon (Unplaced)	GOOD|LOW|HOMO|NON|PRI|NONE	GOOD|DIP|REPT|TOP|REP|NONE	PURE|DIP|UNIQ|TOP|PRI|COMP	HPURGE	PRIMARY	PRIMARY	quarantine	1
BASENJISCAFF0432	81172	47	46.18	100	81172	250	247	0.5083	0.836	4.378	79.54	15.24	BASENJICHR11.02	BASENJISCAFF0473	96.28	856.04	KEEP	0	0	1840	2047.55	213263	278792	0.51428	98.552	0	0	FALSE	FALSE	-1	-1	0	0	0	0	0	0	BASPBJ0575_pilon (Unplaced) Diploidocus:PRIMARY|PRIMARY|PRIMARY|PRIMARY|PRIMARY|PRIMARY	GOOD|DIP|REPT|NON|REP|NONE	GOOD|DIP|REPT|TOP|REP|NONE	GOOD|EXS|REPT|TOP|REP|NONE	PRIMARY	PRIMARY	PRIMARY	keep	7
BASENJISCAFF0433	2331	12	10.5453	100	2331	14	8	0.5515	25.44	74.56	0	0	BASENJICHR35.02	BASENJICHR29.01	75.76	126.98	KEEP	0	1	2	87.8725	220	15706.6	0.55985	77.0933	0	0	FALSE	FALSE	-1	-1	0	0	0	0	0	0	BASPBJ0576_pilon (Unplaced)	GOOD|HAP|HOMO|SEC|ALT|NONE	GOOD|EXS|REPT|TOP|REP|NONE	PURE|DIP|UNIQ|TOP|PRI|COMP	HPURGE	PRIMARY	PRIMARY	quarantine	1
BASENJISCAFF0434	670	24	24.2776	100	670	15	15	0.5376	0	54.18	45.82	0	BASENJICHR35.02	BASENJISCAFF0782	61.49	194.18	KEEP	0	0	2	84.9193	1062	16289.9	0.55075	82.4534	0	0	FALSE	FALSE	-1	-1	0	0	0	0	0	0	BASPBJ0577_pilon (Unplaced) Diploidocus:PRIMARY|PRIMARY|PRIMARY|PRIMARY|PRIMARY|PRIMARY	GOOD|HAP|HOMO|NON|ALT|NONE	GOOD|EXS|REPT|TOP|REP|NONE	PURE|DIP|UNIQ|TOP|REP|NONE	PRIMARY	PRIMARY	PRIMARY	keep	7
BASENJISCAFF0435	1852	18	16.4941	98.3801	1822	14	23	0.5332	11.77	86.23	1.998	0	BASENJICHR35.02	BASENJISCAFF0772	77.86	327.32	KEEP	0	0	2	84.0444	784	16073.8	0.56156	84.2278	0	0	FALSE	FALSE	-1	-1	0	0	0	0	0	0	BASPBJ0578_pilon (Unplaced) Diploidocus:PRIMARY	PURE|HAP|REPT|NON|ALT|NONE	GOOD|EXS|REPT|TOP|REP|NONE	GOOD|DIP|HOMO|SEC|REP|NONE	HPURGE	PRIMARY	PRIMARY	quarantine	2
BASENJISCAFF0436	264	1	1	100	264	0	1	0.3709	100	0	0	0	-	-	0	0	JUNK	0	0	2	362.79	4	17622.6	0.375	73.5294	0	0	FALSE	FALSE	-1	-1	0	0	0	0	0	0	BASPBJ0580_pilon (Unplaced)	LOWX|LOW|UNIQ|NON|ALT|NONE	-	-	LOWCOV	-	-	junk	1
BASENJISCAFF0437	849393	348	408.98	99.8142	847815	21272	19632	0.5499	5.121	2.257	6.21	86.41	-	-	0	0	JUNK	0	0	260	413.671	31341	36718.7	0.58456	81.6474	0	0	FALSE	FALSE	-1	-1	0	0	0	0	1480	1480	BASPBJ0581_pilon (Unplaced) Diploidocus:COLLAPSED|COLLAPSED|COLLAPSED|COLLAPSED|COLLAPSED|COLLAPSED	PURE|EXS|UNIQ|NON|REP|NONE	-	-	COLLAPSED	-	-	repeat	7
BASENJISCAFF0438	549	6	5.9144	100	549	0	7	0.4244	100	0	0	0	-	-	0	0	JUNK	0	0	47	3208.54	1582	113006	0.42805	82.6004	0	0	FALSE	FALSE	-1	-1	0	0	0	0	0	0	BASPBJ0584_pilon (Unplaced)	PURE|LOW|UNIQ|NON|REP|NONE	-	-	HPURGE	-	-	quarantine	1
BASENJISCAFF0439	1462	2	1.9555	98.0164	1433	3	0	0.54	100	0	0	0	-	-	0	0	JUNK	0	0	1	26.4937	0	4366.84	0.55677	34.5404	0	0	FALSE	FALSE	-1	-1	0	0	0	0	0	0	BASPBJ0585_pilon (Unplaced)	LOWX|LOW|UNIQ|NON|PRI|NONE	-	-	LOWCOV	-	-	junk	1
BASENJISCAFF0440	15936	185	204.519	99.9874	15934	411	490	0.5476	0.1125	0.019	12.05	87.81	-	-	0	0	JUNK	0	0	1	128.424	35	13984.9	0.56363	55.1037	0	0	FALSE	FALSE	-1	-1	0	0	0	0	0	0	BASPBJ0586_pilon (Unplaced) Diploidocus:COLLAPSED|COLLAPSED|COLLAPSED|COLLAPSED|COLLAPSED|COLLAPSED	PURE|EXS|UNIQ|NON|PRI|NONE	-	-	COLLAPSED	-	-	repeat	7
BASENJISCAFF0441	568	4	3.6215	100	568	0	5	0.5015	100	0	0	0	-	-	0	0	JUNK	0	0	1	13.6845	0	4158.32	0.51056	16.6052	0	0	FALSE	FALSE	-1	-1	0	0	0	0	0	0	BASPBJ0587_pilon (Unplaced)	PURE|LOW|UNIQ|NON|PRI|NONE	-	-	HPURGE	-	-	quarantine	1
BASENJISCAFF0442	1133	15	14.8164	100	1133	11	14	0.5556	1.236	98.76	0	0	BASENJISCAFF0366	BASENJISCAFF0980	70.96	70.96	KEEP	0	0	3	46.2249	1293	8685.68	0.56664	80.2168	0	0	FALSE	FALSE	-1	-1	0	0	0	0	0	0	BASPBJ0589_pilon (Unplaced)	PURE|HAP|HOMO|NON|REP|NONE	GOOD|EXS|HOMO|TOP|ALT|NONE	GOOD|HAP|REPT|TOP|PRI|NONE	HPURGE	PRIMARY	PRIMARY	quarantine	1
BASENJISCAFF0443	3134	144	127.875	99.9362	3132	133	129	0.5547	1.564	0.3188	12.73	85.39	-	-	0	0	JUNK	0	0	8	133.569	4681	24699.5	0.56892	87.7735	0	0	FALSE	FALSE	-1	-1	0	0	0	0	0	0	BASPBJ0590_pilon (Unplaced) Diploidocus:COLLAPSED|COLLAPSED|COLLAPSED|COLLAPSED|COLLAPSED|COLLAPSED	PURE|EXS|UNIQ|NON|REP|NONE	-	-	COLLAPSED	-	-	repeat	7
BASENJISCAFF0444	1923	5	4.9537	100	1923	1	7	0.5116	100	0	0	0	-	-	0	0	JUNK	0	0	1	425.212	0	57731.8	0.5221	32.3669	0	0	FALSE	FALSE	-1	-1	0	0	0	0	0	0	BASPBJ0591_pilon (Unplaced)	PURE|LOW|UNIQ|NON|PRI|NONE	-	-	HPURGE	-	-	quarantine	1
BASENJISCAFF0445	1941	29	28.2519	100	1941	31	22	0.55	0	25.19	74.81	0	BASENJICHR35.02	BASENJISCAFF0856	61.46	97.68	KEEP	0	0	3	69.9013	722	14451.9	0.56775	100	0	0	FALSE	FALSE	-1	-1	0	0	0	0	0	0	BASPBJ0592_pilon (Unplaced) Diploidocus:PRIMARY|PRIMARY|PRIMARY|PRIMARY|PRIMARY|PRIMARY	GOOD|DIP|HOMO|NON|REP|NONE	GOOD|EXS|REPT|TOP|REP|NONE	GOOD|DIP|HOMO|SEC|ALT|NONE	PRIMARY	PRIMARY	PRIMARY	keep	7
BASENJISCAFF0446	55731	57	82.4464	100	55731	86	951	0.5058	1.83	24.43	28.66	45.08	BASENJISCAFF0473	BASENJISCAFF0284	99.86	12492.2	REPEAT	0	0	726	1005.18	308169	288564	0.51971	88.8071	0	0	FALSE	FALSE	-1	-1	0	0	0	0	0	0	BASPBJ0594_pilon (Unplaced) Diploidocus:PRIMARY|PRIMARY|PRIMARY|PRIMARY|PRIMARY|PRIMARY	WEAK|EXS|REPT|NON|REP|NONE	GOOD|EXS|REPT|TOP|REP|NONE	GOOD|EXS|HOMO|TOP|REP|NONE	PRIMARY	PRIMARY	PRIMARY	keep	7
BASENJISCAFF0447	735	1	0.9959	99.5918	732	1	0	0.5401	100	0	0	0	-	-	0	0	JUNK	0	0	1	1.27786	0	170.279	0.54422	11.7066	0	0	FALSE	FALSE	-1	-1	0	0	0	0	0	0	BASPBJ0595_pilon (Unplaced)	LOWX|LOW|UNIQ|NON|PRI|NONE	-	-	LOWCOV	-	-	junk	1
BASENJISCAFF0448	619	0	0	0	0	0	0	0	100	0	0	0	-	-	0	0	KEEP	0	0	5	2568.95	69	89859.6	0.41034	58.6846	0	0	FALSE	FALSE	-1	-1	0	0	0	0	0	0	BASPBJ0596_pilon (Unplaced)	LOWX|LOW|UNIQ|NON|REP|NONE	-	-	LOWCOV	-	-	junk	1
BASENJISCAFF0449	584	1	0.9966	99.6575	582	1	0	0.5179	100	0	0	0	-	-	0	0	JUNK	0	0	1	1.45878	0	166.717	0.53767	10.9319	0	0	FALSE	FALSE	-1	-1	0	0	0	0	0	0	BASPBJ0597_pilon (Unplaced)	LOWX|LOW|UNIQ|NON|PRI|NONE	-	-	LOWCOV	-	-	junk	1
BASENJISCAFF0450	3723	15	31.2834	97.7438	3639	48	41	0.555	4.486	58.66	34.33	2.525	BASENJICHR35.02	BASENJISCAFF0954	94.76	199.01	KEEP	0	2	1	37.2086	2	5818.67	0.56218	51.0955	0	0	FALSE	FALSE	-1	-1	0	0	0	0	0	0	BASPBJ0598_pilon (Unplaced) Diploidocus:KEEP|KEEP|PRIMARY|PRIMARY|PRIMARY|PRIMARY	GOOD|HAP|HOMO|SEC|PRI|NONE	GOOD|EXS|REPT|TOP|REP|NONE	PURE|DIP|UNIQ|SEC|ALT|NONE	PRIMARY	PRIMARY	PRIMARY	keep	7
BASENJISCAFF0451	4639	1	0.9851	98.5126	4570	0	1	0.3694	100	0	0	0	-	-	0	0	JUNK	0	0	1	8.03468	0	214.668	0.36948	26.4036	0	0	FALSE	FALSE	-1	-1	0	0	0	0	0	0	BASPBJ0599_pilon (Unplaced)	LOWX|LOW|UNIQ|NON|PRI|NONE	-	-	LOWCOV	-	-	junk	1
BASENJISCAFF0452	1696	24	23.2765	100	1696	40	1	0.5073	1.297	54.66	44.05	0	BASENJISCAFF0473	BASENJISCAFF0269	94.16	1325.24	KEEP	0	0	1495	1589.84	174682	223321	0.51533	84.8503	0	0	FALSE	FALSE	-1	-1	0	0	0	0	0	0	BASPBJ0600_pilon (Unplaced) Diploidocus:PRIMARY|PRIMARY|PRIMARY|PRIMARY|PRIMARY|PRIMARY	GOOD|HAP|REPT|NON|REP|NONE	GOOD|EXS|REPT|TOP|REP|NONE	WEAK|EXS|REPT|TOP|REP|NONE	PRIMARY	PRIMARY	PRIMARY	keep	7
BASENJISCAFF0453	2357	22	20.5885	98.1756	2314	20	27	0.551	8.74	88.84	2.418	0	BASENJICHR35.02	BASENJISCAFF1063	95.76	287.65	REPEAT	0	0	1	64.2072	255	13121.9	0.56173	76.6195	0	0	FALSE	FALSE	-1	-1	0	0	0	0	0	0	BASPBJ0601_pilon (Unplaced) Diploidocus:PRIMARY|PRIMARY|PRIMARY|PRIMARY|PRIMARY	PURE|HAP|REPT|NON|PRI|NONE	GOOD|EXS|REPT|TOP|REP|NONE	PURE|DIP|UNIQ|SEC|REP|NONE	HPURGE	PRIMARY	PRIMARY	quarantine	6
BASENJISCAFF0454	2407	31	36.1226	100	2407	43	43	0.5491	0.083	23.72	76.19	0	BASENJICHR35.02	BASENJISCAFF1100	38.76	91.36	KEEP	0	0	4	117.864	2504	20850.6	0.5779	95.7161	0	0	FALSE	FALSE	-1	-1	0	0	0	0	0	0	BASPBJ0602_pilon (Unplaced) Diploidocus:PRIMARY|PRIMARY|PRIMARY|PRIMARY|PRIMARY|PRIMARY	GOOD|DIP|PART|NON|REP|NONE	GOOD|EXS|REPT|TOP|REP|NONE	WEAK|LOW|REPT|SEC|PRI|NONE	PRIMARY	PRIMARY	KEEP	keep	7
BASENJISCAFF0455	389	1	1	100	389	0	1	0.4859	100	0	0	0	-	-	0	0	JUNK	0	0	1	120.369	0	25941.5	0.50643	41.3223	0	0	FALSE	FALSE	-1	-1	0	0	0	0	0	0	BASPBJ0603_pilon (Unplaced)	LOWX|LOW|UNIQ|NON|PRI|NONE	-	-	LOWCOV	-	-	junk	1
BASENJISCAFF0456	6977	11	84.431	99.7563	6960	167	165	0.55	45.46	15.29	0.08579	39.16	-	-	0	0	JUNK	0	0	1	87.7088	84	10437.6	0.5617	55.8193	0	0	FALSE	FALSE	-1	-1	0	0	0	0	0	0	BASPBJ0604_pilon (Unplaced)	WEAK|LOW|UNIQ|NON|PRI|NONE	-	-	JUNK	-	-	junk	1
BASENJISCAFF0457	991	8	8.1594	100	991	13	1	0.5166	42.18	57.82	0	0	BASENJISCAFF0269	BASENJISCAFF0135	72.86	122.5	KEEP	0	0	1	374.693	0	48076.4	0.5116	46.6321	0	0	FALSE	FALSE	-1	-1	0	0	0	0	0	0	BASPBJ0605_pilon (Unplaced)	GOOD|HAP|HOMO|NON|PRI|NONE	WEAK|EXS|REPT|TOP|REP|NONE	WEAK|LOW|REPT|TOP|REP|NONE	HPURGE	PRIMARY	KEEP	quarantine	1
BASENJISCAFF0458	3598	3	3.3894	91.5787	3295	8	0	0.3886	96.89	3.113	0	0	-	-	0	0	JUNK	0	0	3274	3661.25	141168	150731	0.39661	95.0728	0	0	FALSE	FALSE	-1	-1	0	0	0	0	0	0	BASPBJ0606_pilon (Unplaced)	PURE|LOW|UNIQ|NON|REP|NONE	-	-	HPURGE	-	-	quarantine	1
BASENJISCAFF0459	11733	46	41.5368	100	11733	47	38	0.5083	0.026	10.08	89.89	0	-	-	0	0	KEEP	0	0	1741	1825.28	206413	248472	0.51223	99.5729	0	0	FALSE	FALSE	-1	-1	0	0	0	0	0	0	BASPBJ0607_pilon (Unplaced) Diploidocus:PRIMARY|PRIMARY|PRIMARY|PRIMARY|PRIMARY|PRIMARY	PURE|DIP|UNIQ|NON|REP|NONE	-	-	PRIMARY	-	-	keep	7
BASENJISCAFF0460	1483	13	12.3142	100	1483	9	9	0.5118	8.833	91.17	0	0	BASENJISCAFF0070	BASENJICHR8.03	71.27	144.77	KEEP	0	0	5	755.034	69	90981.7	0.51787	61.908	0	0	FALSE	FALSE	-1	-1	0	0	0	0	0	0	BASPBJ0608_pilon (Unplaced)	PURE|HAP|HOMO|NON|REP|NONE	GOOD|DIP|REPT|TOP|REP|NONE	GOOD|DIP|REPT|SEC|REP|NONE	HPURGE	PRIMARY	PRIMARY	quarantine	1
BASENJISCAFF0461	50637	55	48.9174	100	50637	269	102	0.5089	2.526	18.49	64.8	14.18	BASENJISCAFF0299	BASENJISCAFF0664	92.2	1155.17	KEEP	0	0	1766	1854.44	205226	251474	0.51547	88.1271	0	0	FALSE	FALSE	-1	-1	0	0	0	0	0	0	BASPBJ0609_pilon (Unplaced) Diploidocus:PRIMARY|PRIMARY|PRIMARY|PRIMARY|PRIMARY|PRIMARY	GOOD|DIP|REPT|NON|REP|NONE	GOOD|EXS|REPT|TOP|REP|NONE	GOOD|HAP|REPT|TOP|REP|NONE	PRIMARY	PRIMARY	PRIMARY	keep	7
BASENJISCAFF0462	5253	6	6.2145	100	5253	5	9	0.5079	73.84	26.16	0	0	BASENJISCAFF0277	BASENJISCAFF0833	97.68	788.08	REPEAT	0	0	896	1344.26	347902	355524	0.51076	95.3893	0	0	FALSE	FALSE	-1	-1	0	0	0	0	0	0	BASPBJ0610_pilon (Unplaced)	GOOD|LOW|REPT|NON|REP|NONE	GOOD|EXS|REPT|TOP|REP|NONE	WEAK|DIP|REPT|TOP|REP|NONE	HPURGE	PRIMARY	PRIMARY	quarantine	1
BASENJISCAFF0463	202	1	1.3465	100	202	0	2	0.5521	100	0	0	0	-	-	0	0	JUNK	0	0	2	9.33523	79	1774.93	0.55941	66.4773	0	0	FALSE	FALSE	-1	-1	0	0	0	0	0	0	BASPBJ0611_pilon (Unplaced)	LOWX|LOW|UNIQ|NON|ALT|NONE	-	-	LOWCOV	-	-	junk	1
BASENJISCAFF0464	849	8	8.4782	100	849	7	4	0.4941	18.73	81.27	0	0	BASENJISCAFF0572	BASENJISCAFF0404	40.52	232.74	KEEP	0	0	1	314.022	0	57330	0.48057	42.4058	0	0	FALSE	FALSE	-1	-1	0	0	0	0	0	0	BASPBJ0612_pilon (Unplaced)	PURE|HAP|PART|NON|PRI|NONE	GOOD|DIP|REPT|TOP|REP|NONE	WEAK|DIP|REPT|SEC|REP|NONE	HPURGE	PRIMARY	PRIMARY	quarantine	1
BASENJISCAFF0465	2985	1	0.7243	72.4288	2162	0	1	0.3199	100	0	0	0	-	-	0	0	JUNK	0	0	1	3.34201	0	72.7621	0.33501	23.7242	0	0	FALSE	FALSE	-1	-1	0	0	0	0	0	0	BASPBJ0615_pilon (Unplaced)	LOWX|LOW|UNIQ|NON|PRI|NONE	-	-	LOWCOV	-	-	junk	1
BASENJISCAFF0466	1289	0	0	0	0	0	0	0	100	0	0	0	-	-	0	0	KEEP	0	0	1	4.25732	0	529.756	0.28782	21.6944	0	0	FALSE	FALSE	-1	-1	0	0	0	0	0	0	BASPBJ0616_pilon (Unplaced)	LOWX|LOW|UNIQ|NON|PRI|NONE	-	-	LOWCOV	-	-	junk	1
BASENJISCAFF0467	1328	11	10.7327	100	1328	6	11	0.5452	22.36	77.64	0	0	BASENJICHR10.01	BASENJICHR1.02	72.52	145.26	KEEP	0	0	1	53.4101	313	10499.4	0.56401	58.679	0	0	FALSE	FALSE	-1	-1	0	0	0	0	0	0	BASPBJ0617_pilon (Unplaced) Diploidocus:PRIMARY	GOOD|HAP|HOMO|NON|PRI|NONE	PURE|DIP|UNIQ|TOP|PRI|COMP|+VEC	WEAK|DIP|REPT|TOP|REP|NONE	HPURGE	PRIMARY	PRIMARY	quarantine	2
BASENJISCAFF0468	1189	26	25.2246	99.159	1179	23	19	0.5477	1.01	43.4	55.59	0	BASENJISCAFF0782	BASENJICHR35.02	76.7	253.99	KEEP	0	0	4	107.249	2435	21052.9	0.5677	99.1402	0	0	FALSE	FALSE	-1	-1	0	0	0	0	0	0	BASPBJ0619_pilon (Unplaced) Diploidocus:PRIMARY|PRIMARY|PRIMARY|PRIMARY|PRIMARY|PRIMARY	GOOD|DIP|REPT|NON|REP|NONE	PURE|DIP|UNIQ|TOP|REP|NONE	GOOD|EXS|REPT|TOP|REP|NONE	PRIMARY	PRIMARY	PRIMARY	keep	7
BASENJISCAFF0469	1738	66	63.4868	100	1738	56	43	0.5526	0	0.921	50.4	48.68	BASENJICHR35.02	BASENJISCAFF0651	99.54	311.62	REPEAT	0	0	7	152.862	3236	25844.5	0.57537	99.7664	0	0	FALSE	FALSE	-1	-1	0	0	0	0	0	0	BASPBJ0620_pilon (Unplaced) Diploidocus:PRIMARY|PRIMARY|PRIMARY|PRIMARY|PRIMARY|PRIMARY	GOOD|DIP|REPT|NON|REP|NONE	GOOD|EXS|REPT|TOP|REP|NONE	PURE|DIP|UNIQ|SEC|ALT|NONE	PRIMARY	PRIMARY	PRIMARY	keep	7
BASENJISCAFF0470	1016	100	93.0285	100	1016	50	66	0.5495	0	0	3.937	96.06	-	-	0	0	JUNK	0	0	5	95.1465	2193	17661.4	0.56693	97.7778	0	0	FALSE	FALSE	-1	-1	0	0	0	0	0	0	BASPBJ0621_pilon (Unplaced) Diploidocus:COLLAPSED|COLLAPSED|COLLAPSED|COLLAPSED|COLLAPSED|COLLAPSED	PURE|EXS|UNIQ|NON|REP|NONE	-	-	COLLAPSED	-	-	repeat	7
BASENJISCAFF0471	4148	23	21.716	100	4148	18	23	0.5074	9.185	51.4	39.42	0	BASENJISCAFF0015	BASENJISCAFF0572	94.14	1454.32	KEEP	1	1	2093	2200.66	240097	313280	0.51519	98.3018	0	0	FALSE	FALSE	-1	-1	0	0	0	0	0	0	BASPBJ0622_pilon (Unplaced) Diploidocus:PRIMARY|PRIMARY|PRIMARY|PRIMARY|PRIMARY|PRIMARY	GOOD|HAP|REPT|TOP|REP|NONE	GOOD|EXS|REPT|TOP|REP|NONE	GOOD|DIP|REPT|TOP|REP|NONE	PRIMARY	PRIMARY	PRIMARY	keep	7
BASENJISCAFF0472	4797	177	169.072	100	4797	164	141	0.5478	0	0	0.188	99.81	-	-	0	0	JUNK	0	0	6	376.524	3027	28629.5	0.5666	99.6018	0	0	FALSE	FALSE	-1	-1	0	0	0	0	0	0	BASPBJ0624_pilon (Unplaced) Diploidocus:COLLAPSED|COLLAPSED|COLLAPSED|COLLAPSED|COLLAPSED|COLLAPSED	PURE|EXS|UNIQ|NON|REP|NONE	-	-	COLLAPSED	-	-	repeat	7
BASENJISCAFF0473	95916	269	294.536	100	95916	115	1193	0.5113	0.132	7.606	31.03	61.23	BASENJICHR11.02	BASENJISCAFF0325	94.39	2941.69	KEEP	27	7	1634	1763.21	182577	226826	0.52776	84.1787	0	0	FALSE	FALSE	-1	-1	0	0	0	0	0	0	BASPBJ0625_pilon (Unplaced) Diploidocus:PRIMARY|PRIMARY|PRIMARY|PRIMARY|PRIMARY|PRIMARY	GOOD|EXS|REPT|TOP|REP|NONE	GOOD|DIP|REPT|TOP|REP|NONE	GOOD|EXS|REPT|TOP|REP|NONE	PRIMARY	PRIMARY	PRIMARY	keep	7
BASENJISCAFF0474	1519	31	28.7209	100	1519	31	26	0.5535	0.329	43.52	56.16	0	BASENJISCAFF0980	BASENJISCAFF0483	42.79	78.8	KEEP	0	0	6	84.3724	2311	14488	0.56485	88.2117	0	0	FALSE	FALSE	-1	-1	0	0	0	0	0	0	BASPBJ0628_pilon (Unplaced) Diploidocus:PRIMARY|PRIMARY|PRIMARY|PRIMARY|PRIMARY|PRIMARY	GOOD|DIP|PART|NON|REP|NONE	GOOD|HAP|REPT|TOP|PRI|NONE	GOOD|HAP|REPT|TOP|PRI|NONE	PRIMARY	PRIMARY	KEEP	keep	7
BASENJISCAFF0475	8887	71	67.5271	99.9325	8881	86	121	0.3231	8.327	3.87	35.95	51.85	BASENJICHR35.02	BASENJICHR14.02	97.79	939.98	REPEAT	0	0	2	1212.32	330	40700.9	0.31856	77.4292	0	0	FALSE	FALSE	-1	-1	0	0	0	0	0	0	BASPBJ0632_pilon (Unplaced) Diploidocus:PRIMARY|PRIMARY|PRIMARY|PRIMARY|PRIMARY|PRIMARY	GOOD|EXS|REPT|NON|ALT|NONE	GOOD|EXS|REPT|TOP|REP|NONE	WEAK|DIP|REPT|SEC|PRI|NONE	PRIMARY	PRIMARY	PRIMARY	keep	7
BASENJISCAFF0476	1022	1	1.1556	67.9061	694	0	4	0.5327	100	0	0	0	-	-	0	0	JUNK	0	0	1	21.3976	0	3885.85	0.54501	31.9277	0	0	FALSE	FALSE	-1	-1	0	0	0	0	0	0	BASPBJ0633_pilon (Unplaced)	LOWX|LOW|UNIQ|NON|PRI|NONE	-	-	LOWCOV	-	-	junk	1
BASENJISCAFF0477	317	2	1.877	100	317	1	1	0.4099	100	0	0	0	-	-	0	0	JUNK	0	0	1	1003.86	0	36430.7	0.40063	47.7663	0	0	FALSE	FALSE	-1	-1	0	0	0	0	0	0	BASPBJ0634_pilon (Unplaced)	LOWX|LOW|UNIQ|NON|PRI|NONE	-	-	LOWCOV	-	-	junk	1
BASENJISCAFF0478	1129	9	7.7883	99.0257	1118	1	12	0.4029	42.07	57.93	0	0	BASENJICHR9.01	BASENJICHR16.01	95.75	431.36	REPEAT	0	0	775	1249.78	34460	59194.6	0.38441	77.5159	0	0	FALSE	FALSE	-1	-1	0	0	0	0	0	0	BASPBJ0635_pilon (Unplaced)	GOOD|HAP|REPT|NON|REP|NONE	PURE|DIP|UNIQ|TOP|PRI|COMP	PURE|DIP|UNIQ|TOP|PRI|COMP	HPURGE	PRIMARY	PRIMARY	quarantine	1
BASENJISCAFF0479	1695	53	42.2147	100	1695	33	40	0.5542	14.16	5.31	80.53	0	-	-	0	0	KEEP	0	0	8	125.384	2197	20926.2	0.56991	85.0809	0	0	FALSE	FALSE	-1	-1	0	0	0	0	0	0	BASPBJ0639_pilon (Unplaced) Diploidocus:PRIMARY|PRIMARY|PRIMARY|PRIMARY|PRIMARY|PRIMARY	PURE|DIP|UNIQ|NON|REP|NONE	-	-	PRIMARY	-	-	keep	7
BASENJISCAFF0480	1188	8	8.2441	100	1188	8	3	0.5371	16.25	83.75	0	0	BASENJISCAFF0825	-	4.97	4.97	KEEP	0	0	1	8.76764	0	1252.64	0.55471	35.5422	0	0	FALSE	FALSE	-1	-1	0	0	0	0	0	0	BASPBJ0640_pilon (Unplaced)	PURE|HAP|PART|NON|PRI|NONE	GOOD|HAP|REPT|TOP|ALT|NONE	-	HPURGE	PRIMARY	-	quarantine	1
BASENJISCAFF0481	1360	3	4.1051	100	1360	0	9	0.5074	93.46	6.544	0	0	-	-	0	0	JUNK	0	0	1	157.265	0	16205.3	0.52647	27.6612	0	0	FALSE	FALSE	-1	-1	0	0	0	0	0	0	BASPBJ0641_pilon (Unplaced)	PURE|LOW|UNIQ|NON|PRI|NONE	-	-	HPURGE	-	-	quarantine	1
BASENJISCAFF0482	356	6	5.1011	100	356	4	2	0.5804	100	0	0	0	-	-	0	0	JUNK	0	0	1	67.8546	494	13280.8	0.56461	56.3636	0	0	FALSE	FALSE	-1	-1	0	0	0	0	0	0	BASPBJ0642_pilon (Unplaced)	PURE|LOW|UNIQ|NON|PRI|NONE	-	-	LOWQUAL	-	-	quarantine	1
BASENJISCAFF0483	10174	14	29.191	99.538	10127	73	74	0.5293	12.79	59.26	8.473	19.48	BASENJICHR35.02	BASENJICHR1.02	89.37	282.3	KEEP	1	1	1	1414.74	16	52826.9	0.5114	52.1384	0	0	FALSE	FALSE	-1	-1	0	0	0	0	0	0	BASPBJ0643_pilon (Unplaced) Diploidocus:KEEP|KEEP|KEEP|KEEP|KEEP|KEEP	GOOD|HAP|REPT|TOP|PRI|NONE	GOOD|EXS|REPT|TOP|REP|NONE	WEAK|DIP|REPT|TOP|REP|NONE	KEEP	PRIMARY	PRIMARY	keep	7
BASENJISCAFF0484	3372	1	0.9021	90.2135	3042	1	0	0.6083	100	0	0	0	-	-	0	0	JUNK	0	0	1	1.31022	0	11.309	0.6032	8.45786	0	0	FALSE	FALSE	-1	-1	0	0	0	0	0	0	BASPBJ0644_pilon (Unplaced)	LOWX|LOW|UNIQ|NON|PRI|NONE	-	-	LOWCOV	-	-	junk	1
BASENJISCAFF0485	2692	9	9.3001	99.8514	2688	18	9	0.5609	34.17	65.83	0	0	BASENJICHR1.02	BASENJISCAFF0474	26.41	75.78	KEEP	0	0	1	27.6497	0	4193.9	0.56835	39.7224	0	0	FALSE	FALSE	-1	-1	0	0	0	0	0	0	BASPBJ0645_pilon (Unplaced)	GOOD|HAP|PART|NON|PRI|NONE	GOOD|DIP|REPT|TOP|REP|NONE	GOOD|DIP|PART|TOP|REP|NONE	HPURGE	PRIMARY	PRIMARY	quarantine	1
BASENJISCAFF0486	3709	97	83.4891	95.3896	3538	8	157	0.5085	4.61	2.48	28.77	64.14	BASENJISCAFF1023	BASENJISCAFF0284	97.84	1428.98	REPEAT	0	0	707	1069.34	337257	324613	0.51281	92.2889	0	0	FALSE	FALSE	-1	-1	0	0	0	0	0	0	BASPBJ0646_pilon (Unplaced) Diploidocus:PRIMARY|PRIMARY|PRIMARY|PRIMARY|PRIMARY|PRIMARY	GOOD|EXS|REPT|NON|REP|NONE	WEAK|HAP|REPT|TOP|REP|NONE	GOOD|EXS|HOMO|TOP|REP|NONE	PRIMARY	PRIMARY	PRIMARY	keep	7
BASENJISCAFF0487	2259	54	49.0509	100	2259	79	2	0.5097	0	7.924	92.08	0	-	-	0	0	KEEP	2	2	579	1040.19	289762	312569	0.51262	95.0291	0	0	FALSE	FALSE	-1	-1	0	0	0	0	0	0	BASPBJ0647_pilon (Unplaced) Diploidocus:PRIMARY|PRIMARY|PRIMARY|PRIMARY|PRIMARY|PRIMARY	PURE|DIP|UNIQ|TOP|REP|NONE	-	-	PRIMARY	-	-	keep	7
BASENJISCAFF0488	514	1	1	100	514	1	0	0.3754	100	0	0	0	-	-	0	0	JUNK	0	0	1	4544.5	0	128077	0.36381	45.4918	0	0	FALSE	FALSE	-1	-1	0	0	0	0	0	0	BASPBJ0649_pilon (Unplaced)	LOWX|LOW|UNIQ|NON|PRI|NONE	-	-	LOWCOV	-	-	junk	1
BASENJISCAFF0489	3703	36	33.2252	100	3703	56	16	0.5481	0.081	19.17	80.75	0	-	-	0	0	KEEP	0	1	4	123.56	1178	22739	0.57575	81.0987	0	0	FALSE	FALSE	-1	-1	0	0	0	0	0	0	BASPBJ0650_pilon (Unplaced) Diploidocus:PRIMARY|PRIMARY|PRIMARY|PRIMARY|PRIMARY|PRIMARY	PURE|DIP|UNIQ|SEC|REP|NONE	-	-	PRIMARY	-	-	keep	7
BASENJISCAFF0490	694	4	3.8141	100	694	2	3	0.539	100	0	0	0	-	-	0	0	JUNK	0	0	1	8.1482	0	1021.98	0.54179	21.5569	0	0	FALSE	FALSE	-1	-1	0	0	0	0	0	0	BASPBJ0651_pilon (Unplaced)	PURE|LOW|UNIQ|NON|PRI|NONE	-	-	HPURGE	-	-	quarantine	1
BASENJISCAFF0491	2614	37	29.8749	100	2614	22	36	0.5583	20.01	16.03	63.96	0	BASENJICHR35.02	BASENJISCAFF0890	88.26	360.94	KEEP	0	0	74	194.207	17939	33384.8	0.57804	81.2983	0	0	FALSE	FALSE	-1	-1	0	0	0	0	0	0	BASPBJ0652_pilon (Unplaced) Diploidocus:PRIMARY|PRIMARY|PRIMARY|PRIMARY|PRIMARY|PRIMARY	GOOD|DIP|REPT|NON|REP|NONE	GOOD|EXS|REPT|TOP|REP|NONE	GOOD|DIP|REPT|TOP|REP|NONE	PRIMARY	PRIMARY	PRIMARY	keep	7
BASENJISCAFF0492	6359	110	108.712	100	6359	254	9	0.5085	0	5.976	19.03	75	BASENJISCAFF0284	BASENJISCAFF0572	96.84	3686.88	REPEAT	0	0	693	998.383	304134	295439	0.51345	91.568	0	0	FALSE	FALSE	-1	-1	0	0	0	0	0	0	BASPBJ0653_pilon (Unplaced) Diploidocus:COLLAPSED|PRIMARY|COLLAPSED|COLLAPSED|COLLAPSED|COLLAPSED	GOOD|EXS|REPT|NON|REP|NONE	GOOD|EXS|HOMO|TOP|REP|NONE	GOOD|DIP|REPT|TOP|REP|NONE	COLLAPSED	PRIMARY	PRIMARY	repeat	7
BASENJISCAFF0493	655	2	1.7084	100	655	1	1	0.5063	100	0	0	0	-	-	0	0	JUNK	0	0	1	301.17	0	58165.6	0.50992	32.7504	0	0	FALSE	FALSE	-1	-1	0	0	0	0	0	0	BASPBJ0654_pilon (Unplaced)	LOWX|LOW|UNIQ|NON|PRI|NONE	-	-	LOWCOV	-	-	junk	1
BASENJISCAFF0494	1067	8	7.6954	100	1067	1	11	0.3965	35.9	64.11	0	0	-	-	0	0	KEEP	0	0	1	872.372	0	28505.5	0.4105	37.9443	0	0	FALSE	FALSE	-1	-1	0	0	0	0	0	0	BASPBJ0655_pilon (Unplaced)	GOOD|HAP|UNIQ|NON|PRI|NONE	-	-	HPURGE	-	-	quarantine	1
BASENJISCAFF0495	4816	52	42.8025	99.9169	4812	65	58	0.5482	2.138	26.49	70.81	0.5605	BASENJICHR35.02	BASENJISCAFF0556	68.31	206.27	KEEP	0	0	4	115.858	1250	22243.6	0.56873	75.5115	0	0	FALSE	FALSE	-1	-1	0	0	0	0	0	0	BASPBJ0656_pilon (Unplaced) Diploidocus:PRIMARY|PRIMARY|PRIMARY|PRIMARY|PRIMARY|PRIMARY	GOOD|DIP|HOMO|NON|REP|NONE	GOOD|EXS|REPT|TOP|REP|NONE	GOOD|EXS|HOMO|SEC|PRI|NONE	PRIMARY	PRIMARY	PRIMARY	keep	7
BASENJISCAFF0496	5574	117	94.4666	100	5574	96	143	0.4622	0	14.75	11.27	73.99	BASENJICHR31.01	BASENJICHR19.01	73.2	446.07	KEEP	0	0	1	973.136	50	36741.4	0.45712	58.2552	0	0	FALSE	FALSE	-1	-1	0	0	0	0	0	0	BASPBJ0657_pilon (Unplaced) Diploidocus:COLLAPSED|COLLAPSED|COLLAPSED|COLLAPSED|COLLAPSED|COLLAPSED	GOOD|EXS|REPT|NON|PRI|NONE	PURE|DIP|UNIQ|TOP|PRI|COMP	PURE|DIP|UNIQ|TOP|PRI|COMP	COLLAPSED	PRIMARY	PRIMARY	repeat	7
BASENJISCAFF0497	1271	49	47.4949	99.4493	1264	24	40	0.5505	1.259	0.2357	98.51	0	-	-	0	0	KEEP	0	1	7	91.7117	3346	16756.6	0.56255	94.5382	0	0	FALSE	FALSE	-1	-1	0	0	0	0	0	0	BASPBJ0658_pilon (Unplaced) Diploidocus:PRIMARY|PRIMARY|PRIMARY|PRIMARY|PRIMARY|PRIMARY	PURE|DIP|UNIQ|SEC|REP|NONE	-	-	PRIMARY	-	-	keep	7
BASENJISCAFF0498	48340	36	34.3072	100	48340	95	88	0.5101	0.002	18.16	81.84	0	-	-	0	0	KEEP	1	0	1780	1949.79	208660	264295	0.51264	99.851	0	0	FALSE	FALSE	-1	-1	0	0	0	0	0	0	BASPBJ0659_pilon (Unplaced) Diploidocus:PRIMARY|PRIMARY|PRIMARY|PRIMARY|PRIMARY|PRIMARY	PURE|DIP|UNIQ|TOP|REP|NONE	-	-	PRIMARY	-	-	keep	7
BASENJISCAFF0499	557	1	0.9982	99.8205	556	0	1	0.691	100	0	0	0	-	-	0	0	JUNK	0	0	1	67.7439	0	2710.85	0.71634	18.6441	0	0	FALSE	FALSE	-1	-1	0	0	0	0	0	0	BASPBJ0660_pilon (Unplaced)	LOWX|LOW|UNIQ|NON|PRI|NONE	-	-	LOWCOV	-	-	junk	1
BASENJISCAFF0500	1182	2	3.0254	100	1182	3	6	0.4433	93.06	6.937	0	0	-	-	0	0	JUNK	0	0	1	208.096	0	5682.67	0.46447	45.6747	0	0	FALSE	FALSE	-1	-1	0	0	0	0	0	0	BASPBJ0661_pilon (Unplaced)	LOWX|LOW|UNIQ|NON|PRI|NONE	-	-	LOWCOV	-	-	junk	1
BASENJISCAFF0501	783	7	6.6143	100	783	0	9	0.4	69.99	30.01	0	0	BASENJICHR17.01	BASENJICHR11.01	69.86	113.15	KEEP	0	0	1	899.059	0	32614.1	0.40485	35.1387	0	0	FALSE	FALSE	-1	-1	0	0	0	0	0	0	BASPBJ0662_pilon (Unplaced)	GOOD|LOW|HOMO|NON|PRI|NONE	PURE|DIP|UNIQ|TOP|PRI|COMP|+VEC	PURE|DIP|UNIQ|TOP|PRI|COMP	HPURGE	PRIMARY	PRIMARY	quarantine	1
BASENJISCAFF0502	1970	1	0.998	99.797	1966	0	1	0.4124	100	0	0	0	-	-	0	0	JUNK	0	0	1	2110.95	0	62836	0.42183	34.6193	0	0	FALSE	FALSE	-1	-1	0	0	0	0	0	0	BASPBJ0663_pilon (Unplaced)	LOWX|LOW|UNIQ|NON|PRI|NONE	-	-	LOWCOV	-	-	junk	1
BASENJISCAFF0503	4385	220	218.78	100	4385	214	213	0.5515	0.684	0	0.023	99.29	-	-	0	0	JUNK	0	0	5	118.853	2960	23020	0.57104	98.5777	0	0	FALSE	FALSE	-1	-1	0	0	0	0	0	0	BASPBJ0665_pilon (Unplaced) Diploidocus:COLLAPSED|COLLAPSED|COLLAPSED|COLLAPSED|COLLAPSED|COLLAPSED	PURE|EXS|UNIQ|NON|REP|NONE	-	-	COLLAPSED	-	-	repeat	7
BASENJISCAFF0504	7057	56	53.8049	99.83	7045	52	60	0.5473	0.4955	0.08486	89.67	9.749	-	-	0	0	KEEP	0	0	1	26.7851	0	4518.53	0.54953	26.4685	0	0	FALSE	FALSE	-1	-1	0	0	0	0	0	0	BASPBJ0666_pilon (Unplaced) Diploidocus:PRIMARY|PRIMARY|PRIMARY|PRIMARY|PRIMARY|PRIMARY	PURE|DIP|UNIQ|NON|PRI|NONE	-	-	PRIMARY	-	-	keep	7
BASENJISCAFF0505	601	10	10.025	100	601	2	11	0.5128	14.98	85.03	0	0	BASENJISCAFF0486	BASENJISCAFF0289	74.21	183.86	KEEP	1	0	3	529.162	200	110000	0.51581	61.2174	0	0	FALSE	FALSE	-1	-1	0	0	0	0	0	0	BASPBJ0667_pilon (Unplaced)	PURE|HAP|HOMO|TOP|REP|NONE	GOOD|EXS|REPT|TOP|REP|NONE	GOOD|DIP|HOMO|SEC|PRI|NONE	HPURGE	PRIMARY	PRIMARY	quarantine	1
BASENJISCAFF0506	2522	6	6.4675	98.295	2479	4	12	0.2987	59.36	40.64	0	0	BASENJICHR1.02	BASENJICHR19.01	97.66	2453.49	REPEAT	0	0	7	32.3341	823	5878.65	0.29778	96.6346	0	0	FALSE	FALSE	-1	-1	0	0	0	0	0	0	BASPBJ0669_pilon (Unplaced)	GOOD|LOW|REPT|NON|REP|NONE	GOOD|DIP|REPT|TOP|REP|NONE	PURE|DIP|UNIQ|TOP|PRI|COMP	HPURGE	PRIMARY	PRIMARY	quarantine	1
BASENJISCAFF0507	898	3	2.8285	100	898	1	3	0.5067	100	0	0	0	-	-	0	0	JUNK	0	0	1	306.506	0	60079.4	0.51893	40.5963	0	0	FALSE	FALSE	-1	-1	0	0	0	0	0	0	BASPBJ0670_pilon (Unplaced)	PURE|LOW|UNIQ|NON|PRI|NONE	-	-	HPURGE	-	-	quarantine	1
BASENJISCAFF0508	5842	6	5.6267	94.1801	5502	5	9	0.3986	77.46	22.54	0	0	BASENJICHR35.02	BASENJICHR7.01	87.61	942.42	KEEP	0	0	1	2343.32	42	73243.5	0.40962	65.87	0	0	FALSE	FALSE	-1	-1	0	0	0	0	0	0	BASPBJ0671_pilon (Unplaced)	GOOD|LOW|REPT|NON|PRI|NONE	GOOD|EXS|REPT|TOP|REP|NONE	PURE|DIP|UNIQ|TOP|PRI|COMP	HPURGE	PRIMARY	PRIMARY	quarantine	1
BASENJISCAFF0509	332	1	0.9789	97.8916	325	0	1	0.3141	100	0	0	0	-	-	0	0	JUNK	0	0	1	1.11438	0	9.71895	0.3012	4.90196	0	0	FALSE	FALSE	-1	-1	0	0	0	0	0	0	BASPBJ0672_pilon (Unplaced)	LOWX|LOW|UNIQ|NON|PRI|NONE	-	-	LOWCOV	-	-	junk	1
BASENJISCAFF0510	714	3	2.2031	100	714	3	0	0.4963	100	0	0	0	-	-	0	0	JUNK	0	0	1	330.847	0	92699.4	0.52941	48.9826	0	0	FALSE	FALSE	-1	-1	0	0	0	0	0	0	BASPBJ0673_pilon (Unplaced)	PURE|LOW|UNIQ|NON|PRI|NONE	-	-	HPURGE	-	-	quarantine	1
BASENJISCAFF0511	1925	92	82.7803	100	1925	130	7	0.5056	0	0.364	25.35	74.29	BASENJISCAFF0473	BASENJISCAFF0707	96.1	484.62	REPEAT	0	0	508	916.364	271845	271237	0.51532	91.4165	0	0	FALSE	FALSE	-1	-1	0	0	0	0	0	0	BASPBJ0674_pilon (Unplaced) Diploidocus:PRIMARY|PRIMARY|PRIMARY|PRIMARY|PRIMARY|PRIMARY	GOOD|EXS|REPT|NON|REP|NONE	GOOD|EXS|REPT|TOP|REP|NONE	PURE|DIP|UNIQ|TOP|REP|NONE	PRIMARY	PRIMARY	PRIMARY	keep	7
BASENJISCAFF0512	6326	120	133.067	100	6326	122	184	0.547	0.3	0.285	20.19	79.23	BASENJICHR35.02	BASENJICHR29.01	64.26	122.53	KEEP	0	0	1	53.0846	3	10441.8	0.55343	51.4921	0	0	FALSE	FALSE	-1	-1	0	0	0	0	0	0	BASPBJ0675_pilon (Unplaced) Diploidocus:COLLAPSED|COLLAPSED|COLLAPSED|COLLAPSED|COLLAPSED|COLLAPSED	GOOD|EXS|HOMO|NON|PRI|NONE	GOOD|EXS|REPT|TOP|REP|NONE	PURE|DIP|UNIQ|TOP|PRI|COMP	PRIMARY	PRIMARY	PRIMARY	keep	7
BASENJISCAFF0513	14283	146	146.103	99.965	14278	400	364	0.5455	6.575	6.385	13.23	73.81	-	-	0	0	JUNK	0	0	7	358.015	2491	28513.4	0.55409	90.6292	0	0	FALSE	FALSE	-1	-1	0	0	0	0	0	0	BASPBJ0676_pilon (Unplaced) Diploidocus:COLLAPSED|COLLAPSED|COLLAPSED|COLLAPSED|COLLAPSED|COLLAPSED	GOOD|EXS|UNIQ|NON|REP|NONE	-	-	COLLAPSED	-	-	repeat	7
BASENJISCAFF0514	2118	8	7.4108	100	2118	7	6	0.5046	47.4	52.6	0	0	BASENJISCAFF0877	BASENJISCAFF0801	18.79	18.79	KEEP	0	0	894	1326.72	349567	354531	0.5118	96.3193	0	0	FALSE	FALSE	-1	-1	0	0	0	0	0	0	BASPBJ0677_pilon (Unplaced)	GOOD|HAP|PART|NON|REP|NONE	GOOD|HAP|HOMO|TOP|REP|NONE	GOOD|DIP|HOMO|SEC|REP|NONE	HPURGE	PRIMARY	PRIMARY	quarantine	1
BASENJISCAFF0515	4416	90	84.3628	100	4416	67	88	0.545	0	0	14.31	85.69	-	-	0	0	JUNK	0	0	5	129.989	2567	24784.7	0.56726	99.795	0	0	FALSE	FALSE	-1	-1	0	0	0	0	0	0	BASPBJ0679_pilon (Unplaced) Diploidocus:COLLAPSED|COLLAPSED|COLLAPSED|COLLAPSED|COLLAPSED|COLLAPSED	PURE|EXS|UNIQ|NON|REP|NONE	-	-	COLLAPSED	-	-	repeat	7
BASENJISCAFF0516	998	4	4.1303	100	998	3	4	0.5175	100	0	0	0	-	-	0	0	JUNK	0	0	1	267.876	3	82069.2	0.52505	52.1605	0	0	FALSE	FALSE	-1	-1	0	0	0	0	0	0	BASPBJ0680_pilon (Unplaced)	PURE|LOW|UNIQ|NON|PRI|NONE	-	-	HPURGE	-	-	quarantine	1
BASENJISCAFF0517	1089	11	10.5188	100	1089	9	8	0.556	13.04	86.96	0	0	BASENJISCAFF0320	BASENJISCAFF0834	83.38	106.24	KEEP	0	1	4	90.0235	1137	13169.6	0.57851	86.2653	0	0	FALSE	FALSE	-1	-1	0	0	0	0	0	0	BASPBJ0682_pilon (Unplaced)	PURE|HAP|HOMO|SEC|REP|NONE	PURE|DIP|UNIQ|TOP|REP|NONE	GOOD|DIP|HOMO|SEC|REP|NONE	HPURGE	PRIMARY	PRIMARY	quarantine	1
BASENJISCAFF0518	1151	8	7.914	100	1151	3	11	0.5546	24.5	75.5	0	0	BASENJISCAFF0347	BASENJISCAFF0198	47.78	47.78	KEEP	0	0	1	14.4231	0	2417.91	0.56733	22.2222	0	0	FALSE	FALSE	-1	-1	0	0	0	0	0	0	BASPBJ0683_pilon (Unplaced)	GOOD|HAP|PART|NON|PRI|NONE	GOOD|EXS|REPT|TOP|ALT|NONE	GOOD|EXS|REPT|TOP|REP|NONE	HPURGE	COLLAPSED	PRIMARY	quarantine	1
BASENJISCAFF0519	771	1	1	100	771	0	1	0.5574	100	0	0	0	-	-	0	0	JUNK	0	0	1	6.69262	0	1153.48	0.57198	19.7315	0	0	FALSE	FALSE	-1	-1	0	0	0	0	0	0	BASPBJ0684_pilon (Unplaced)	LOWX|LOW|UNIQ|NON|PRI|NONE	-	-	LOWCOV	-	-	junk	1
BASENJISCAFF0520	2478	25	24.8914	100	2478	2	45	0.5045	0.928	50	49.07	0	BASENJISCAFF0299	BASENJISCAFF0664	96.25	934.5	REPEAT	0	0	1710	1742.92	199363	235612	0.51776	85.6851	0	0	FALSE	FALSE	-1	-1	0	0	0	0	0	0	BASPBJ0685_pilon (Unplaced) Diploidocus:PRIMARY|PRIMARY|PRIMARY|PRIMARY|PRIMARY|PRIMARY	GOOD|HAP|REPT|NON|REP|NONE	GOOD|EXS|REPT|TOP|REP|NONE	GOOD|HAP|REPT|TOP|REP|NONE	PRIMARY	PRIMARY	PRIMARY	keep	7
BASENJISCAFF0521	725	2	2	100	725	1	1	0.3873	100	0	0	0	-	-	0	0	JUNK	0	0	1	174.196	0	4968.39	0.39862	42.4893	0	0	FALSE	FALSE	-1	-1	0	0	0	0	0	0	BASPBJ0686_pilon (Unplaced)	LOWX|LOW|UNIQ|NON|PRI|NONE	-	-	LOWCOV	-	-	junk	1
BASENJISCAFF0522	10222	155	200.917	100	10222	339	301	0.5327	0.44	0.01	2.612	96.94	-	-	0	0	JUNK	0	0	15	797.483	5669	47149.7	0.55126	96.6948	0	0	FALSE	FALSE	-1	-1	0	0	0	0	0	0	BASPBJ0687_pilon (Unplaced) Diploidocus:COLLAPSED|COLLAPSED|COLLAPSED|COLLAPSED|COLLAPSED|COLLAPSED	PURE|EXS|UNIQ|NON|REP|NONE	-	-	COLLAPSED	-	-	repeat	7
BASENJISCAFF0523	2599	24	23.1597	99.9615	2598	46	1	0.3849	19.24	32.44	48.33	0	BASENJICHR9.01	BASENJICHR4.01	80.95	618.24	KEEP	0	0	2561	2515.02	111182	104346	0.38707	88.8457	0	0	FALSE	FALSE	-1	-1	0	0	0	0	0	0	BASPBJ0688_pilon (Unplaced) Diploidocus:PRIMARY|PRIMARY|PRIMARY|PRIMARY|PRIMARY|PRIMARY	WEAK|DIP|REPT|NON|REP|NONE	PURE|DIP|UNIQ|TOP|PRI|COMP	PURE|DIP|UNIQ|SEC|PRI|COMP|+VEC	PRIMARY	PRIMARY	PRIMARY	keep	7
BASENJISCAFF0524	2725	7	7.0892	100	2725	7	5	0.5105	73.54	26.46	0	0	BASENJISCAFF0299	BASENJICHR9.03	96.4	205.39	HAPLOTIG	0	0	1	1295.08	2	90995.6	0.51303	55.0574	0	0	FALSE	FALSE	-1	-1	0	0	0	0	0	0	BASPBJ0691_pilon (Unplaced)	GOOD|LOW|HOMO|NON|PRI|NONE	GOOD|EXS|REPT|TOP|REP|NONE	GOOD|DIP|REPT|TOP|REP|NONE	HPURGE	COLLAPSED	PRIMARY	quarantine	1
BASENJISCAFF0525	1336	11	10.7934	99.9251	1335	18	1	0.398	21.63	78.37	0	0	BASENJICHR9.01	BASENJICHR18.10	64.9	76.05	KEEP	0	1	40	2390.51	1216	92384	0.40943	77.9389	0	0	FALSE	FALSE	-1	-1	0	0	0	0	0	0	BASPBJ0692_pilon (Unplaced)	GOOD|HAP|HOMO|SEC|REP|NONE	PURE|DIP|UNIQ|TOP|PRI|COMP	GOOD|DIP|HOMO|SEC|REP|NONE	HPURGE	PRIMARY	PRIMARY	quarantine	1
BASENJISCAFF0526	2171	26	25.0668	100	2171	25	22	0.5496	0.23	43.16	56.61	0	BASENJICHR35.02	BASENJISCAFF0671	92.45	162.37	KEEP	0	0	3	135.058	1369	22615.2	0.57577	90.9557	0	0	FALSE	FALSE	-1	-1	0	0	0	0	0	0	BASPBJ0693_pilon (Unplaced) Diploidocus:PRIMARY|PRIMARY|PRIMARY|PRIMARY|PRIMARY|PRIMARY	GOOD|DIP|HOMO|NON|REP|NONE	GOOD|EXS|REPT|TOP|REP|NONE	GOOD|DIP|HOMO|SEC|REP|NONE	PRIMARY	PRIMARY	PRIMARY	keep	7
BASENJISCAFF0527	410	0	0	0	0	0	0	0	100	0	0	0	-	-	0	0	KEEP	0	0	1	1	0	0.4375	0.51707	0.78125	0	0	FALSE	FALSE	-1	-1	0	0	0	0	0	0	BASPBJ0694_pilon (Unplaced)	LOWX|LOW|UNIQ|NON|PRI|NONE	-	-	LOWCOV	-	-	junk	1
BASENJISCAFF0528	344	2	1.968	100	344	2	0	0.4364	100	0	0	0	-	-	0	0	JUNK	0	0	1	1649.16	0	61882.6	0.4564	42.4528	0	0	FALSE	FALSE	-1	-1	0	0	0	0	0	0	BASPBJ0695_pilon (Unplaced)	LOWX|LOW|UNIQ|NON|PRI|NONE	-	-	LOWCOV	-	-	junk	1
BASENJISCAFF0529	1089	4	4.6373	100	1089	4	5	0.5036	100	0	0	0	-	-	0	0	JUNK	0	0	17	683.951	4731	184782	0.51148	81.4675	0	0	FALSE	FALSE	-1	-1	0	0	0	0	0	0	BASPBJ0696_pilon (Unplaced)	PURE|LOW|UNIQ|NON|REP|NONE	-	-	HPURGE	-	-	quarantine	1
BASENJISCAFF0530	3287	37	35.4086	99.8479	3282	37	28	0.5461	0.4866	4.046	95.47	0	-	-	0	0	KEEP	0	1	5	116.324	2324	21111.2	0.56069	96.9028	0	0	FALSE	FALSE	-1	-1	0	0	0	0	0	0	BASPBJ0697_pilon (Unplaced) Diploidocus:PRIMARY|PRIMARY|PRIMARY|PRIMARY|PRIMARY|PRIMARY	PURE|DIP|UNIQ|SEC|REP|NONE	-	-	PRIMARY	-	-	keep	7
BASENJISCAFF0531	2598	53	54.3322	100	2598	50	51	0.5505	0	0.192	80.56	19.25	-	-	0	0	KEEP	0	0	5	122.041	2041	20497.5	0.5662	99.3779	0	0	FALSE	FALSE	-1	-1	0	0	0	0	0	0	BASPBJ0699_pilon (Unplaced) Diploidocus:PRIMARY|PRIMARY|PRIMARY|PRIMARY|PRIMARY|PRIMARY	PURE|DIP|UNIQ|NON|REP|NONE	-	-	PRIMARY	-	-	keep	7
BASENJISCAFF0532	1193	12	11.3906	100	1193	21	0	0.5103	9.388	90.61	0	0	BASENJISCAFF0473	BASENJISCAFF0070	94.55	1098.91	KEEP	0	0	2	507.261	2	56377.5	0.52724	51.4139	0	0	FALSE	FALSE	-1	-1	0	0	0	0	0	0	BASPBJ0700_pilon (Unplaced)	PURE|HAP|REPT|NON|ALT|NONE	GOOD|EXS|REPT|TOP|REP|NONE	GOOD|DIP|REPT|TOP|REP|NONE	HPURGE	PRIMARY	PRIMARY	quarantine	1
BASENJISCAFF0533	1687	18	16.4564	100	1687	18	8	0.5057	0.356	99.64	0	0	BASENJISCAFF0585	BASENJISCAFF0284	54.77	230.53	KEEP	0	0	703	944.314	296479	271373	0.50741	94.5214	0	0	FALSE	FALSE	-1	-1	0	0	0	0	0	0	BASPBJ0701_pilon (Unplaced)	PURE|HAP|HOMO|NON|REP|NONE	WEAK|DIP|REPT|TOP|REP|NONE	GOOD|EXS|REPT|TOP|REP|NONE	HPURGE	PRIMARY	PRIMARY	quarantine	1
BASENJISCAFF0534	4706	14	14.285	100	4706	26	5	0.5136	7.501	92.5	0	0	BASENJISCAFF0269	BASENJISCAFF0070	87.95	296.2	KEEP	0	0	814	1481.79	92992	188015	0.51891	77.8419	0	0	FALSE	FALSE	-1	-1	0	0	0	0	0	0	BASPBJ0702_pilon (Unplaced)	PURE|HAP|REPT|NON|REP|NONE	WEAK|EXS|REPT|TOP|REP|NONE	GOOD|DIP|REPT|TOP|REP|NONE	HPURGE	PRIMARY	PRIMARY	quarantine	1
BASENJISCAFF0535	504	1	0.6052	60.5159	305	1	0	0.5098	100	0	0	0	-	-	0	0	JUNK	0	0	1	31.4519	0	3550.69	0.51587	13.1799	0	0	FALSE	FALSE	-1	-1	0	0	0	0	0	0	BASPBJ0703_pilon (Unplaced)	LOWX|LOW|UNIQ|NON|PRI|NONE	-	-	LOWCOV	-	-	junk	1
BASENJISCAFF0536	1018	1	1	100	1018	0	1	0.5195	100	0	0	0	-	-	0	0	JUNK	0	0	1	1436.01	0	39543.6	0.5167	30.746	0	0	FALSE	FALSE	-1	-1	0	0	0	0	0	0	BASPBJ0704_pilon (Unplaced)	LOWX|LOW|UNIQ|NON|PRI|NONE	-	-	LOWCOV	-	-	junk	1
BASENJISCAFF0537	297	2	1.9966	100	297	2	0	0.4893	100	0	0	0	-	-	0	0	JUNK	0	0	1	65.4465	0	31068.9	0.49158	28.7823	0	0	FALSE	FALSE	-1	-1	0	0	0	0	0	0	BASPBJ0705_pilon (Unplaced)	LOWX|LOW|UNIQ|NON|PRI|NONE	-	-	LOWCOV	-	-	junk	1
BASENJISCAFF0538	361	0	0	0	0	0	0	0	100	0	0	0	-	-	0	0	KEEP	0	0	1	1.01791	0	0.00299	0.7036	0.29851	0	0	FALSE	FALSE	-1	-1	0	0	0	0	0	0	BASPBJ0706_pilon (Unplaced)	LOWX|LOW|UNIQ|NON|PRI|NONE	-	-	LOWCOV	-	-	junk	1
BASENJISCAFF0539	1078	7	6.6837	100	1078	8	5	0.5525	74.21	25.79	0	0	BASENJICHR1.02	BASENJISCAFF0298	79.68	196.29	KEEP	0	0	1	48.7823	0	7427.76	0.55751	41.2548	0	0	FALSE	FALSE	-1	-1	0	0	0	0	0	0	BASPBJ0707_pilon (Unplaced)	GOOD|LOW|HOMO|NON|PRI|NONE	GOOD|DIP|REPT|TOP|REP|NONE	GOOD|DIP|REPT|TOP|PRI|NONE	HPURGE	PRIMARY	PRIMARY	quarantine	1
BASENJISCAFF0540	3816	112	106.479	100	3816	126	95	0.5472	0	0.524	14.52	84.96	-	-	0	0	JUNK	0	0	6	121.948	2754	22863	0.56813	99.1293	0	0	FALSE	FALSE	-1	-1	0	0	0	0	0	0	BASPBJ0708_pilon (Unplaced) Diploidocus:COLLAPSED|COLLAPSED|COLLAPSED|COLLAPSED|COLLAPSED|COLLAPSED	PURE|EXS|UNIQ|NON|REP|NONE	-	-	COLLAPSED	-	-	repeat	7
BASENJISCAFF0541	587	10	9.9165	100	587	0	12	0.4097	1.533	98.47	0	0	BASENJICHR16.01	BASENJICHR10.01	93.7	102.04	KEEP	0	0	8	1720.09	61	60901.2	0.40716	62.5668	0	0	FALSE	FALSE	-1	-1	0	0	0	0	0	0	BASPBJ0710_pilon (Unplaced)	PURE|HAP|HOMO|NON|REP|NONE	PURE|DIP|UNIQ|TOP|PRI|COMP	PURE|DIP|UNIQ|TOP|PRI|COMP|+VEC	HPURGE	PRIMARY	PRIMARY	quarantine	1
BASENJISCAFF0542	1749	25	25.8285	100	1749	15	23	0.5502	0	53.4	46.6	0	BASENJICHR35.02	BASENJICHR1.02	97.94	354.03	KEEP	0	0	1	67.4544	416	11955.2	0.56604	77.7133	0	0	FALSE	FALSE	-1	-1	0	0	0	0	0	0	BASPBJ0711_pilon (Unplaced) Diploidocus:PRIMARY|PRIMARY|PRIMARY|PRIMARY|PRIMARY|PRIMARY	GOOD|HAP|REPT|NON|PRI|NONE	GOOD|EXS|REPT|TOP|REP|NONE	WEAK|DIP|REPT|TOP|REP|NONE	PRIMARY	PRIMARY	PRIMARY	keep	7
BASENJISCAFF0543	33604	76	102.683	100	33604	212	188	0.5089	0	7.812	33.96	58.23	BASENJISCAFF0325	BASENJISCAFF0150	99.83	914.39	REPEAT	0	0	1840	2271.73	214696	274678	0.51544	98.4633	0	0	FALSE	FALSE	-1	-1	0	0	0	0	0	0	BASPBJ0712_pilon (Unplaced) Diploidocus:PRIMARY|PRIMARY|PRIMARY|PRIMARY|PRIMARY|PRIMARY	GOOD|EXS|REPT|NON|REP|NONE	GOOD|EXS|REPT|TOP|REP|NONE	PURE|DIP|UNIQ|TOP|REP|NONE	PRIMARY	PRIMARY	PRIMARY	keep	7
BASENJISCAFF0544	3242	31	29.9633	100	3242	24	34	0.5501	0.031	7.804	92.17	0	-	-	0	0	KEEP	0	0	5	113.081	2735	21468.8	0.56909	98.1965	0	0	FALSE	FALSE	-1	-1	0	0	0	0	0	0	BASPBJ0713_pilon (Unplaced) Diploidocus:PRIMARY|PRIMARY|PRIMARY|PRIMARY|PRIMARY|PRIMARY	PURE|DIP|UNIQ|NON|REP|NONE	-	-	PRIMARY	-	-	keep	7
BASENJISCAFF0545	252	2	1.9444	100	252	0	3	0.4648	100	0	0	0	-	-	0	0	JUNK	0	0	1	85.9336	0	22443.4	0.5	29.2035	0	0	FALSE	FALSE	-1	-1	0	0	0	0	0	0	BASPBJ0714_pilon (Unplaced)	LOWX|LOW|UNIQ|NON|PRI|NONE	-	-	LOWCOV	-	-	junk	1
BASENJISCAFF0546	2374	36	33.3715	100	2374	9	44	0.5113	0	31.51	68.49	0	BASENJISCAFF0135	BASENJISCAFF0884	90.73	319.59	KEEP	0	0	1656	1707.02	196726	236279	0.52064	92.0784	0	0	FALSE	FALSE	-1	-1	0	0	0	0	0	0	BASPBJ0716_pilon (Unplaced) Diploidocus:PRIMARY|PRIMARY|PRIMARY|PRIMARY|PRIMARY|PRIMARY	GOOD|DIP|REPT|NON|REP|NONE	WEAK|HAP|REPT|TOP|REP|NONE	GOOD|EXS|REPT|TOP|REP|NONE	PRIMARY	KEEP	PRIMARY	keep	7
BASENJISCAFF0547	884	9	9.2715	100	884	3	9	0.5643	10.41	89.59	0	0	BASENJISCAFF0788	-	8.6	8.6	KEEP	0	0	1	28.493	0	1384.32	0.56561	24.8252	0	0	FALSE	FALSE	-1	-1	0	0	0	0	0	0	BASPBJ0717_pilon (Unplaced)	PURE|HAP|PART|NON|PRI|NONE	GOOD|EXS|HOMO|TOP|REP|NONE	-	HPURGE	PRIMARY	-	quarantine	1
BASENJISCAFF0548	6202	0	0.1819	18.1877	1128	1	0	0.7359	100	0	0	0	-	-	0	0	JUNK	0	0	1	2.12662	0	22.4853	0.74524	11.4799	0	0	FALSE	FALSE	-1	-1	0	0	0	0	0	0	BASPBJ0721_pilon (Unplaced)	LOWX|LOW|UNIQ|NON|PRI|NONE	-	-	LOWCOV	-	-	junk	1
BASENJISCAFF0549	21754	2	3.8615	92.9806	20227	10	18	0.3125	81.34	18.66	0	0	BASENJICHR35.02	BASENJICHR38.01	98.92	5049.04	REPEAT	0	0	2	759.855	60	24069.3	0.33235	74.0887	0	0	FALSE	FALSE	-1	-1	0	0	0	0	0	0	BASPBJ0722_pilon (Unplaced)	LOWX|LOW|REPT|NON|ALT|NONE	GOOD|EXS|REPT|TOP|REP|NONE	PURE|DIP|UNIQ|TOP|PRI|COMP	LOWCOV	PRIMARY	PRIMARY	junk	1
BASENJISCAFF0550	874	3	3.6156	99.0847	866	5	1	0.5482	100	0	0	0	-	-	0	0	JUNK	0	0	1	21.1934	0	4115.27	0.55034	23.467	0	0	FALSE	FALSE	-1	-1	0	0	0	0	0	0	BASPBJ0723_pilon (Unplaced)	PURE|LOW|UNIQ|NON|PRI|NONE	-	-	HPURGE	-	-	quarantine	1
BASENJISCAFF0551	449	2	1.9176	100	449	2	0	0.5135	100	0	0	0	-	-	0	0	JUNK	0	0	1	601.253	0	69739.9	0.51893	38.7707	0	0	FALSE	FALSE	-1	-1	0	0	0	0	0	0	BASPBJ0724_pilon (Unplaced)	LOWX|LOW|UNIQ|NON|PRI|NONE	-	-	LOWCOV	-	-	junk	1
BASENJISCAFF0552	3612	119	104.488	100	3612	110	132	0.5536	0	0.664	20.68	78.65	BASENJISCAFF0704	BASENJISCAFF0185	69.44	69.44	KEEP	0	1	226	187.835	32071	34000.3	0.57364	96.4584	0	0	FALSE	FALSE	-1	-1	0	0	0	0	0	0	BASPBJ0725_pilon (Unplaced) Diploidocus:COLLAPSED|PRIMARY|PRIMARY|PRIMARY|PRIMARY|PRIMARY	GOOD|EXS|HOMO|SEC|REP|NONE	GOOD|EXS|REPT|TOP|REP|NONE	PURE|DIP|UNIQ|SEC|REP|NONE	PRIMARY	PRIMARY	PRIMARY	keep	7
BASENJISCAFF0553	3046	209	180.785	99.4419	3029	166	154	0.5503	0.8206	16.15	0.03282	82.99	-	-	0	0	JUNK	0	0	4	123.619	2245	20664.3	0.56566	81.5563	0	0	FALSE	FALSE	-1	-1	0	0	0	0	0	0	BASPBJ0727_pilon (Unplaced) Diploidocus:COLLAPSED|COLLAPSED|COLLAPSED|COLLAPSED|COLLAPSED|COLLAPSED	PURE|EXS|UNIQ|NON|REP|NONE	-	-	COLLAPSED	-	-	repeat	7
BASENJISCAFF0554	49541	39	39.6142	100	49541	144	146	0.504	0.063	7.418	92.52	0	-	-	0	0	KEEP	0	0	1584	1601.9	189844	222787	0.50905	94.6198	0	0	FALSE	FALSE	-1	-1	0	0	0	0	0	0	BASPBJ0728_pilon (Unplaced) Diploidocus:PRIMARY|PRIMARY|PRIMARY|PRIMARY|PRIMARY|PRIMARY	PURE|DIP|UNIQ|NON|REP|NONE	-	-	PRIMARY	-	-	keep	7
BASENJISCAFF0555	1842	22	21.7562	100	1842	24	23	0.5508	0.271	82.68	17.05	0	BASENJICHR35.02	BASENJISCAFF0531	44.19	57	KEEP	0	0	2	63.5518	562	11198.4	0.55863	86.674	0	0	FALSE	FALSE	-1	-1	0	0	0	0	0	0	BASPBJ0729_pilon (Unplaced) Diploidocus:PRIMARY|PRIMARY|PRIMARY|PRIMARY|PRIMARY	PURE|HAP|PART|NON|ALT|NONE	GOOD|EXS|REPT|TOP|REP|NONE	PURE|DIP|UNIQ|SEC|REP|NONE	HPURGE	PRIMARY	PRIMARY	quarantine	6
BASENJISCAFF0556	5976	104	86.4163	99.9331	5972	92	98	0.553	1.037	1.908	33.95	63.1	BASENJICHR35.02	BASENJISCAFF0422	59.55	124.46	KEEP	0	2	1	86.8155	451	15835.3	0.55489	61.8824	0	0	FALSE	FALSE	-1	-1	0	0	0	0	0	0	BASPBJ0730_pilon (Unplaced) Diploidocus:PRIMARY|PRIMARY|PRIMARY|PRIMARY|PRIMARY|PRIMARY	GOOD|EXS|HOMO|SEC|PRI|NONE	GOOD|EXS|REPT|TOP|REP|NONE	GOOD|DIP|HOMO|TOP|REP|NONE	PRIMARY	PRIMARY	PRIMARY	keep	7
BASENJISCAFF0557	206	3	2.7524	99.5146	205	0	3	0.3764	100	0	0	0	-	-	0	0	JUNK	0	0	1	40.7611	0	991.617	0.36408	28.3333	0	0	FALSE	FALSE	-1	-1	0	0	0	0	0	0	BASPBJ0731_pilon (Unplaced)	PURE|LOW|UNIQ|NON|PRI|NONE	-	-	LOWQUAL	-	-	quarantine	1
BASENJISCAFF0558	18305	85	91.2272	100	18305	145	112	0.5067	0	5.971	32.5	61.53	BASENJISCAFF0284	BASENJISCAFF0076	99.54	3345.66	REPEAT	0	0	795	1187.94	353185	378836	0.51336	99.5459	0	0	FALSE	FALSE	-1	-1	0	0	0	0	0	0	BASPBJ0732_pilon (Unplaced) Diploidocus:PRIMARY|PRIMARY|PRIMARY|PRIMARY|PRIMARY|PRIMARY	GOOD|EXS|REPT|NON|REP|NONE	GOOD|EXS|HOMO|TOP|REP|NONE	PURE|DIP|UNIQ|TOP|REP|NONE	PRIMARY	PRIMARY	PRIMARY	keep	7
BASENJISCAFF0559	1113	3	3.2992	99.9102	1112	3	2	0.5094	100	0	0	0	-	-	0	0	JUNK	0	0	1	49.5198	0	7945.15	0.50674	13.6155	0	0	FALSE	FALSE	-1	-1	0	0	0	0	0	0	BASPBJ0734_pilon (Unplaced)	PURE|LOW|UNIQ|NON|PRI|NONE	-	-	HPURGE	-	-	quarantine	1
BASENJISCAFF0560	355	2	1.9634	100	355	1	1	0.5503	100	0	0	0	-	-	0	0	JUNK	0	0	1	9.99392	0	1247.77	0.58592	37.9939	0	0	FALSE	FALSE	-1	-1	0	0	0	0	0	0	BASPBJ0735_pilon (Unplaced)	LOWX|LOW|UNIQ|NON|PRI|NONE	-	-	LOWCOV	-	-	junk	1
BASENJISCAFF0561	452	8	7.4712	100	452	3	6	0.5591	34.74	65.27	0	0	BASENJICHR29.01	BASENJISCAFF0658	57.08	104.87	KEEP	0	0	1	36.1502	14	7767.54	0.5708	54.2253	0	0	FALSE	FALSE	-1	-1	0	0	0	0	0	0	BASPBJ0737_pilon (Unplaced)	GOOD|HAP|HOMO|NON|PRI|NONE	PURE|DIP|UNIQ|TOP|PRI|COMP	GOOD|DIP|HOMO|TOP|REP|NONE	LOWQUAL	PRIMARY	PRIMARY	quarantine	1
BASENJISCAFF0562	815	15	12.5227	100	815	15	7	0.5513	22.58	77.42	0	0	BASENJISCAFF0704	-	23.93	23.93	KEEP	0	0	1	76.4715	203	13458.6	0.56196	71.4829	0	0	FALSE	FALSE	-1	-1	0	0	0	0	0	0	BASPBJ0739_pilon (Unplaced)	GOOD|HAP|PART|NON|PRI|NONE	GOOD|EXS|HOMO|TOP|REP|NONE	-	HPURGE	PRIMARY	-	quarantine	1
BASENJISCAFF0563	14329	401	406.072	100	14329	292	491	0.5063	0	0	0	100	-	-	0	0	JUNK	0	0	705	1267.75	306577	332489	0.51106	97.7487	0	0	FALSE	FALSE	-1	-1	0	0	0	0	0	0	BASPBJ0740_pilon (Unplaced) Diploidocus:COLLAPSED|COLLAPSED|COLLAPSED|COLLAPSED|COLLAPSED|COLLAPSED	PURE|EXS|UNIQ|NON|REP|NONE	-	-	COLLAPSED	-	-	repeat	7
BASENJISCAFF0564	2321	4	4.3132	56.6997	1316	10	4	0.5543	71.56	28.44	0	0	BASENJICHR35.02	BASENJISCAFF1044	95.82	328.18	REPEAT	0	0	1	40.62	0	5997.89	0.56829	37.5163	0	0	FALSE	FALSE	-1	-1	0	0	0	0	0	0	BASPBJ0742_pilon (Unplaced)	GOOD|LOW|REPT|NON|PRI|NONE	GOOD|EXS|REPT|TOP|REP|NONE	PURE|DIP|UNIQ|SEC|REP|NONE	HPURGE	PRIMARY	PRIMARY	quarantine	1
BASENJISCAFF0565	3364	36	36.6139	100	3364	44	27	0.5038	0.357	22.44	77.2	0	BASENJISCAFF0284	BASENJISCAFF0744	90.61	475.3	KEEP	0	1	719	1106	341354	345275	0.51189	99.7603	0	0	FALSE	FALSE	-1	-1	0	0	0	0	0	0	BASPBJ0743_pilon (Unplaced) Diploidocus:PRIMARY|PRIMARY|PRIMARY|PRIMARY|PRIMARY|PRIMARY	GOOD|DIP|REPT|SEC|REP|NONE	GOOD|EXS|HOMO|TOP|REP|NONE	GOOD|DIP|REPT|SEC|REP|NONE	PRIMARY	PRIMARY	PRIMARY	keep	7
BASENJISCAFF0566	1454	12	14.2208	100	1454	17	9	0.5405	5.089	94.91	0	0	BASENJISCAFF0658	BASENJICHR35.02	73.73	98.56	KEEP	2	0	2	40.0476	423	7471.63	0.54127	69.888	0	0	FALSE	FALSE	-1	-1	0	0	0	0	0	0	BASPBJ0745_pilon (Unplaced)	PURE|HAP|HOMO|TOP|ALT|NONE	GOOD|DIP|HOMO|TOP|REP|NONE	GOOD|EXS|REPT|TOP|REP|NONE	HPURGE	PRIMARY	PRIMARY	quarantine	1
BASENJISCAFF0567	2817	3	2.5154	100	2817	0	5	0.5118	100	0	0	0	-	-	0	0	JUNK	0	0	1	191.702	0	23515	0.52396	26.3346	0	0	FALSE	FALSE	-1	-1	0	0	0	0	0	0	BASPBJ0746_pilon (Unplaced)	PURE|LOW|UNIQ|NON|PRI|NONE	-	-	HPURGE	-	-	quarantine	1
BASENJISCAFF0568	6712	184	180.933	100	6712	412	8	0.5049	0	0.06	4.306	95.64	-	-	0	0	JUNK	0	0	509	885.449	234327	253208	0.52265	86.8232	0	0	FALSE	FALSE	-1	-1	0	0	0	0	0	0	BASPBJ0747_pilon (Unplaced) Diploidocus:COLLAPSED|COLLAPSED|COLLAPSED|COLLAPSED|COLLAPSED|COLLAPSED	PURE|EXS|UNIQ|NON|REP|NONE	-	-	COLLAPSED	-	-	repeat	7
BASENJISCAFF0569	773	11	10.2225	100	773	2	12	0.5061	9.961	90.04	0	0	BASENJISCAFF0365	-	48.38	48.38	KEEP	0	0	7	781.415	129	189023	0.511	58.0991	0	0	FALSE	FALSE	-1	-1	0	0	0	0	0	0	BASPBJ0748_pilon (Unplaced)	PURE|HAP|PART|NON|REP|NONE	GOOD|DIP|HOMO|TOP|REP|NONE	-	HPURGE	PRIMARY	-	quarantine	1
BASENJISCAFF0570	1531	32	29.1933	100	1531	8	34	0.5096	0.131	20.97	78.9	0	BASENJISCAFF0177	BASENJISCAFF0801	99.74	1465.84	KEEP	0	0	722	972.42	343541	304820	0.51862	87.7741	0	0	FALSE	FALSE	-1	-1	0	0	0	0	0	0	BASPBJ0750_pilon (Unplaced) Diploidocus:PRIMARY|PRIMARY|PRIMARY|PRIMARY|PRIMARY|PRIMARY	GOOD|DIP|REPT|NON|REP|NONE	GOOD|HAP|REPT|TOP|REP|NONE	GOOD|DIP|REPT|SEC|REP|NONE	PRIMARY	PRIMARY	PRIMARY	keep	7
BASENJISCAFF0571	9323	121	115.511	100	9323	20	397	0.6343	0	0.279	15.83	83.89	-	-	0	0	JUNK	0	0	8	721.398	0	3386.44	0.73914	39.9053	0	0	FALSE	FALSE	-1	-1	0	0	0	0	0	0	BASPBJ0753_pilon (Unplaced) Diploidocus:COLLAPSED|COLLAPSED|COLLAPSED|COLLAPSED|COLLAPSED|COLLAPSED	PURE|EXS|UNIQ|NON|REP|NONE	-	-	COLLAPSED	-	-	repeat	7
BASENJISCAFF0572	83887	53	194.782	99.9666	83859	1590	1486	0.5043	0.2933	1.426	61.86	36.43	BASENJICHR11.02	BASENJICHR9.03	87.97	682.98	KEEP	2	11	1722	1836.66	213263	269864	0.51115	98.1791	0	0	FALSE	FALSE	-1	-1	0	0	0	0	0	0	BASPBJ0754_pilon (Unplaced) Diploidocus:PRIMARY|PRIMARY|PRIMARY|PRIMARY|PRIMARY|PRIMARY	GOOD|DIP|REPT|TOP|REP|NONE	GOOD|DIP|REPT|TOP|REP|NONE	WEAK|DIP|REPT|TOP|REP|NONE	PRIMARY	PRIMARY	PRIMARY	keep	7
BASENJISCAFF0573	3556	62	46.5981	100	3556	57	66	0.5445	25.84	19.04	9.196	45.92	BASENJICHR35.02	BASENJICHR1.02	95.75	450.45	REPEAT	0	0	1	88.9844	580	16447	0.56243	65.4391	0	0	FALSE	FALSE	-1	-1	0	0	0	0	0	0	BASPBJ0755_pilon (Unplaced) Diploidocus:COLLAPSED|REPEAT|REPEAT|REPEAT|REPEAT|REPEAT	WEAK|EXS|REPT|NON|PRI|NONE	GOOD|EXS|REPT|TOP|REP|NONE	WEAK|DIP|REPT|TOP|REP|NONE	REPEAT	PRIMARY	PRIMARY	repeat	7
BASENJISCAFF0574	775	1	0.52	52	403	1	0	0.5462	100	0	0	0	-	-	0	0	JUNK	0	0	1	61.8985	0	10264.6	0.57419	48.1976	0	0	FALSE	FALSE	-1	-1	0	0	0	0	0	0	BASPBJ0756_pilon (Unplaced)	LOWX|LOW|UNIQ|NON|PRI|NONE	-	-	LOWCOV	-	-	junk	1
BASENJISCAFF0575	7973	1	0.7448	74.4764	5938	0	1	0.589	100	0	0	0	-	-	0	0	JUNK	0	0	1	90.6094	0	2208.29	0.60454	12.2688	0	0	FALSE	FALSE	-1	-1	0	0	0	0	0	0	BASPBJ0757_pilon (Unplaced)	LOWX|LOW|UNIQ|NON|PRI|NONE	-	-	LOWCOV	-	-	junk	1
BASENJISCAFF0576	2849	10	10.993	99.7543	2842	10	15	0.5121	31.98	68.02	0	0	BASENJISCAFF0135	BASENJISCAFF0269	85.71	282.24	KEEP	0	0	6	1120.85	98	138497	0.51527	56.3231	0	0	FALSE	FALSE	-1	-1	0	0	0	0	0	0	BASPBJ0758_pilon (Unplaced)	GOOD|HAP|REPT|NON|REP|NONE	WEAK|LOW|REPT|TOP|REP|NONE	WEAK|EXS|REPT|TOP|REP|NONE	HPURGE	KEEP	PRIMARY	quarantine	1
BASENJISCAFF0577	2137	2	1.8769	100	2137	0	4	0.5086	100	0	0	0	-	-	0	0	JUNK	0	0	1	500.811	0	64969.9	0.51006	47.3709	0	0	FALSE	FALSE	-1	-1	0	0	0	0	0	0	BASPBJ0759_pilon (Unplaced)	LOWX|LOW|UNIQ|NON|PRI|NONE	-	-	LOWCOV	-	-	junk	1
BASENJISCAFF0578	1897	34	34.2309	100	1897	58	2	0.5092	0	15.87	84.13	0	-	-	0	0	KEEP	0	0	1596	1631.81	178043	227462	0.52346	77.5521	0	0	FALSE	FALSE	-1	-1	0	0	0	0	0	0	BASPBJ0760_pilon (Unplaced) Diploidocus:PRIMARY|PRIMARY|PRIMARY|PRIMARY|PRIMARY|PRIMARY	PURE|DIP|UNIQ|NON|REP|NONE	-	-	PRIMARY	-	-	keep	7
BASENJISCAFF0579	309	1	0.9968	99.6764	308	1	0	0.3997	100	0	0	0	-	-	0	0	JUNK	0	0	1	1145.15	0	44619.8	0.42071	44.1696	0	0	FALSE	FALSE	-1	-1	0	0	0	0	0	0	BASPBJ0761_pilon (Unplaced)	LOWX|LOW|UNIQ|NON|PRI|NONE	-	-	LOWCOV	-	-	junk	1
BASENJISCAFF0580	936	8	7.3932	100	936	4	4	0.554	47.12	52.89	0	0	BASENJISCAFF0474	BASENJISCAFF0980	49.57	83.01	KEEP	0	1	1	33.1242	70	5173.3	0.5812	63.1868	0	0	FALSE	FALSE	-1	-1	0	0	0	0	0	0	BASPBJ0762_pilon (Unplaced)	GOOD|HAP|PART|SEC|PRI|NONE	GOOD|DIP|PART|TOP|REP|NONE	GOOD|HAP|REPT|TOP|PRI|NONE	HPURGE	PRIMARY	PRIMARY	quarantine	1
BASENJISCAFF0581	7706	7	10.0346	87.7239	6760	35	2	0.5105	50.82	38.33	10.85	0	BASENJISCAFF0135	BASENJISCAFF0461	84.36	1483.1	KEEP	0	0	2106	2233.43	218117	273165	0.51791	93.724	0	0	FALSE	FALSE	-1	-1	0	0	0	0	0	0	BASPBJ0763_pilon (Unplaced)	GOOD|LOW|REPT|NON|REP|NONE	WEAK|LOW|REPT|TOP|REP|NONE	GOOD|DIP|REPT|TOP|REP|NONE	HPURGE	KEEP	PRIMARY	quarantine	1
BASENJISCAFF0582	1312	16	13.9566	100	1312	25	2	0.3891	19.89	80.11	0	0	BASENJICHR15.01	BASENJICHR8.11	66.69	93.06	KEEP	0	1	293	3083.56	12247	119309	0.40473	70.9176	0	0	FALSE	FALSE	-1	-1	0	0	0	0	0	0	BASPBJ0764_pilon (Unplaced)	PURE|HAP|HOMO|SEC|REP|NONE	PURE|DIP|UNIQ|TOP|PRI|COMP	GOOD|EXS|REPT|TOP|PRI|NONE	HPURGE	PRIMARY	PRIMARY	quarantine	1
BASENJISCAFF0583	658	1	1	100	658	1	0	0.5078	100	0	0	0	-	-	0	0	JUNK	0	0	1	106.041	0	30873.6	0.5228	17.5633	0	0	FALSE	FALSE	-1	-1	0	0	0	0	0	0	BASPBJ0765_pilon (Unplaced)	LOWX|LOW|UNIQ|NON|PRI|NONE	-	-	LOWCOV	-	-	junk	1
BASENJISCAFF0584	2198	40	33.5446	98.7261	2170	34	35	0.5552	19.24	5.596	75.16	0	BASENJICHR35.02	BASENJISCAFF0908	90.45	274.29	KEEP	0	0	1	66.8752	458	12893.3	0.56051	66.2983	0	0	FALSE	FALSE	-1	-1	0	0	0	0	0	0	BASPBJ0767_pilon (Unplaced) Diploidocus:PRIMARY|PRIMARY|PRIMARY|PRIMARY|PRIMARY|PRIMARY	GOOD|DIP|REPT|NON|PRI|NONE	GOOD|EXS|REPT|TOP|REP|NONE	PURE|DIP|UNIQ|SEC|PRI|NONE	PRIMARY	PRIMARY	PRIMARY	keep	7
BASENJISCAFF0585	75461	168	232.422	100	75461	1364	571	0.5059	0	0.323	16.87	82.81	-	-	0	0	JUNK	0	0	761	1214.83	345053	361801	0.51519	98.0884	0	0	FALSE	FALSE	-1	-1	0	0	0	0	0	0	BASPBJ0768_pilon (Unplaced) Diploidocus:PRIMARY|PRIMARY|COLLAPSED|COLLAPSED|COLLAPSED|COLLAPSED	PURE|EXS|UNIQ|NON|REP|NONE	-	-	COLLAPSED	-	-	repeat	7
BASENJISCAFF0586	281	2	1.6904	97.8648	275	2	0	0.5322	100	0	0	0	-	-	0	0	JUNK	0	0	6	732.525	20	100146	0.53381	54.5098	0	0	FALSE	FALSE	-1	-1	0	0	0	0	0	0	BASPBJ0769_pilon (Unplaced)	LOWX|LOW|UNIQ|NON|REP|NONE	-	-	LOWCOV	-	-	junk	1
BASENJISCAFF0587	4327	3	3.3157	92.9512	4022	3	4	0.3141	100	0	0	0	-	-	0	0	JUNK	0	0	1	1602.85	38	49368.6	0.29813	62.0553	0	0	FALSE	FALSE	-1	-1	0	0	0	0	0	0	BASPBJ0770_pilon (Unplaced)	PURE|LOW|UNIQ|NON|PRI|NONE	-	-	HPURGE	-	-	quarantine	1
BASENJISCAFF0588	1222	5	4.2717	100	1222	6	0	0.5097	100	0	0	0	-	-	0	0	JUNK	0	0	1	407.94	0	48146.8	0.49836	37.8762	0	0	FALSE	FALSE	-1	-1	0	0	0	0	0	0	BASPBJ0771_pilon (Unplaced)	PURE|LOW|UNIQ|NON|PRI|NONE	-	-	HPURGE	-	-	quarantine	1
BASENJISCAFF0589	2356	80	71.865	100	2356	105	32	0.5066	0	1.231	38.37	60.4	BASENJISCAFF1053	BASENJISCAFF0284	87.35	325.89	KEEP	1	1	721	1054.87	328113	327947	0.51231	95.9227	0	0	FALSE	FALSE	-1	-1	0	0	0	0	0	0	BASPBJ0772_pilon (Unplaced) Diploidocus:PRIMARY|PRIMARY|PRIMARY|PRIMARY|PRIMARY|PRIMARY	GOOD|EXS|REPT|TOP|REP|NONE	GOOD|EXS|REPT|TOP|REP|NONE	GOOD|EXS|HOMO|TOP|REP|NONE	PRIMARY	PRIMARY	PRIMARY	keep	7
BASENJISCAFF0590	795	19	16.8755	100	795	0	24	0.5091	7.421	92.58	0	0	BASENJISCAFF0202	BASENJISCAFF0768	66.92	116.1	KEEP	2	1	16	687.823	1824	189964	0.52327	70.091	0	0	FALSE	FALSE	-1	-1	0	0	0	0	0	0	BASPBJ0773_pilon (Unplaced)	PURE|HAP|HOMO|TOP|REP|NONE	GOOD|DIP|PART|TOP|REP|NONE	PURE|HAP|HOMO|SEC|REP|NONE	HPURGE	PRIMARY	HPURGE	quarantine	1
BASENJISCAFF0591	3603	19	18.9789	99.9445	3601	20	11	0.4689	0.08349	99.92	0	0	BASENJICHR9.03	BASENJICHR28.01	90.84	2175.6	KEEP	0	0	1	1115.4	76	70474.6	0.48293	97.6796	0	0	FALSE	FALSE	-1	-1	0	0	0	0	0	0	BASPBJ0774_pilon (Unplaced)	PURE|HAP|REPT|NON|PRI|NONE	GOOD|DIP|REPT|TOP|REP|NONE	PURE|DIP|UNIQ|TOP|PRI|COMP	HPURGE	PRIMARY	PRIMARY	quarantine	1
BASENJISCAFF0592	4783	2	2.133	100	4783	0	4	0.4483	100	0	0	0	-	-	0	0	JUNK	0	0	1	32.6912	0	816.855	0.44951	48.3498	0	0	FALSE	FALSE	-1	-1	0	0	0	0	0	0	BASPBJ0775_pilon (Unplaced)	LOWX|LOW|UNIQ|NON|PRI|NONE	-	-	LOWCOV	-	-	junk	1
BASENJISCAFF0593	175	1	1	100	175	1	0	0.4413	100	0	0	0	-	-	0	0	JUNK	0	0	1	487.57	0	20038.2	0.50857	40.9396	0	0	FALSE	FALSE	-1	-1	0	0	0	0	0	0	BASPBJ0776_pilon (Unplaced)	LOWX|LOW|UNIQ|NON|PRI|NONE	-	-	LOWCOV	-	-	junk	1
BASENJISCAFF0594	773	3	2.7076	100	773	0	3	0.4923	100	0	0	0	-	-	0	0	JUNK	0	0	1	439.758	1	109202	0.51876	53.1459	0	0	FALSE	FALSE	-1	-1	0	0	0	0	0	0	BASPBJ0777_pilon (Unplaced)	PURE|LOW|UNIQ|NON|PRI|NONE	-	-	HPURGE	-	-	quarantine	1
BASENJISCAFF0595	6072	293	279.445	99.9506	6069	251	295	0.5471	1.334	0.01599	0	98.65	-	-	0	0	JUNK	0	0	3	726.21	1709	36225	0.55912	85.7757	0	0	FALSE	FALSE	-1	-1	0	0	0	0	0	0	BASPBJ0779_pilon (Unplaced) Diploidocus:COLLAPSED|COLLAPSED|COLLAPSED|COLLAPSED|COLLAPSED|COLLAPSED	PURE|EXS|UNIQ|NON|REP|NONE	-	-	COLLAPSED	-	-	repeat	7
BASENJISCAFF0596	4762	0	18.6978	41.6632	1984	103	9	0.3973	63.61	12.43	11.68	12.28	BASENJICHR4.04	BASENJICHR4.01	54.62	107.64	KEEP	0	1	1	894.61	0	34190.1	0.35741	44.5524	0	0	FALSE	FALSE	-1	-1	0	0	0	0	0	0	BASPBJ0780_pilon (Unplaced)	LOWX|LOW|HOMO|SEC|PRI|NONE	PURE|HAP|HOMO|TOP|ALT|NONE	PURE|DIP|UNIQ|TOP|PRI|COMP|+VEC	LOWCOV	HPURGE	PRIMARY	junk	1
BASENJISCAFF0597	3878	79	76.0098	100	3878	87	63	0.5015	0	0	15.78	84.22	-	-	0	0	JUNK	0	0	653	994.04	300035	304152	0.50284	100	0	0	FALSE	FALSE	-1	-1	0	0	0	0	0	0	BASPBJ0782_pilon (Unplaced) Diploidocus:COLLAPSED|COLLAPSED|COLLAPSED|COLLAPSED|COLLAPSED|COLLAPSED	PURE|EXS|UNIQ|NON|REP|NONE	-	-	COLLAPSED	-	-	repeat	7
BASENJISCAFF0598	685	2	1.4978	86.1314	590	0	2	0.554	100	0	0	0	-	-	0	0	JUNK	0	0	1	3.66616	0	556.011	0.54307	15.3262	0	0	FALSE	FALSE	-1	-1	0	0	0	0	0	0	BASPBJ0783_pilon (Unplaced)	LOWX|LOW|UNIQ|NON|PRI|NONE	-	-	LOWCOV	-	-	junk	1
BASENJISCAFF0599	3696	33	32.6889	100	3696	37	35	0.5442	0.027	14.04	85.93	0	-	-	0	0	KEEP	0	0	3	100.123	1177	18593.8	0.56304	90.1907	0	0	FALSE	FALSE	-1	-1	0	0	0	0	0	0	BASPBJ0784_pilon (Unplaced) Diploidocus:PRIMARY|PRIMARY|PRIMARY|PRIMARY|PRIMARY|PRIMARY	PURE|DIP|UNIQ|NON|REP|NONE	-	-	PRIMARY	-	-	keep	7
BASENJISCAFF0600	1791	3	3.2708	100	1791	1	7	0.506	100	0	0	0	-	-	0	0	JUNK	0	0	975	1370.71	358359	378595	0.51033	95.6941	0	0	FALSE	FALSE	-1	-1	0	0	0	0	0	0	BASPBJ0786_pilon (Unplaced)	PURE|LOW|UNIQ|NON|REP|NONE	-	-	HPURGE	-	-	quarantine	1
BASENJISCAFF0601	659	5	4.3657	98.6343	650	2	3	0.2985	100	0	0	0	-	-	0	0	JUNK	0	0	1	8.36335	0	8486.42	0.28832	36.019	0	0	FALSE	FALSE	-1	-1	0	0	0	0	0	0	BASPBJ0787_pilon (Unplaced)	PURE|LOW|UNIQ|NON|PRI|NONE	-	-	HPURGE	-	-	quarantine	1
BASENJISCAFF0602	5651	0	0	0	0	0	0	0	100	0	0	0	-	-	0	0	KEEP	0	0	1	27.7625	0	846.746	0.61582	25.0489	0	0	FALSE	FALSE	-1	-1	0	0	0	0	0	0	BASPBJ0788_pilon (Unplaced)	LOWX|LOW|UNIQ|NON|PRI|NONE	-	-	LOWCOV	-	-	junk	1
BASENJISCAFF0603	3411	68	65.1108	99.8241	3405	74	25	0.556	0.8497	0.1757	50.31	48.67	BASENJISCAFF0392	BASENJISCAFF0980	63.27	77.69	KEEP	0	1	1	1702.11	0	52564.4	0.56171	33.8257	0	0	FALSE	FALSE	-1	-1	0	0	0	0	0	0	BASPBJ0789_pilon (Unplaced) Diploidocus:PRIMARY|PRIMARY|PRIMARY|PRIMARY|PRIMARY|PRIMARY	GOOD|DIP|HOMO|SEC|PRI|NONE	GOOD|DIP|UNIQ|TOP|REP|NONE	GOOD|HAP|REPT|TOP|PRI|NONE	PRIMARY	PRIMARY	PRIMARY	keep	7
BASENJISCAFF0604	3496	167	144.177	99.1991	3468	133	132	0.552	2.66	1.201	16.19	79.95	-	-	0	0	JUNK	0	0	6	116.861	3041	20938.6	0.56093	74.2651	0	0	FALSE	FALSE	-1	-1	0	0	0	0	0	0	BASPBJ0790_pilon (Unplaced) Diploidocus:COLLAPSED|COLLAPSED|COLLAPSED|COLLAPSED|COLLAPSED|COLLAPSED	GOOD|EXS|UNIQ|NON|REP|NONE	-	-	COLLAPSED	-	-	repeat	7
BASENJISCAFF0605	3833	91	80.4626	99.2695	3805	66	82	0.5561	0.8605	1.304	22.07	75.76	BASENJICHR1.02	BASENJICHR35.02	93.35	199.19	KEEP	0	0	291	283.274	51486	49647	0.58414	96.8742	0	0	FALSE	FALSE	-1	-1	0	0	0	0	0	0	BASPBJ0791_pilon (Unplaced) Diploidocus:PRIMARY|PRIMARY|PRIMARY|PRIMARY|PRIMARY|PRIMARY	GOOD|EXS|HOMO|NON|REP|NONE	WEAK|DIP|REPT|TOP|REP|NONE	GOOD|EXS|REPT|TOP|REP|NONE	PRIMARY	PRIMARY	PRIMARY	keep	7
BASENJISCAFF0606	3517	10	9.7742	100	3517	19	1	0.5151	18.31	81.69	0	0	BASENJISCAFF0473	BASENJISCAFF0070	96.28	1738.16	REPEAT	0	0	1	439.37	0	49638	0.52118	39.9885	0	0	FALSE	FALSE	-1	-1	0	0	0	0	0	0	BASPBJ0792_pilon (Unplaced)	PURE|HAP|REPT|NON|PRI|NONE	GOOD|EXS|REPT|TOP|REP|NONE	GOOD|DIP|REPT|TOP|REP|NONE	HPURGE	PRIMARY	PRIMARY	quarantine	1
BASENJISCAFF0607	9352	48	42.7643	99.9786	9350	39	52	0.3429	0.09637	20.78	79.13	0	BASENJICHR35.02	BASENJICHR1.02	97.97	4099.97	REPEAT	0	0	3	1030.13	152	33951.8	0.35126	77.5145	0	0	FALSE	FALSE	-1	-1	0	0	0	0	0	0	BASPBJ0793_pilon (Unplaced) Diploidocus:PRIMARY|PRIMARY|PRIMARY|PRIMARY|PRIMARY|PRIMARY	GOOD|DIP|REPT|NON|REP|NONE	GOOD|EXS|REPT|TOP|REP|NONE	WEAK|DIP|REPT|TOP|REP|NONE	PRIMARY	PRIMARY	PRIMARY	keep	7
BASENJISCAFF0608	4113	6	5.4916	100	4113	12	0	0.5123	87.97	12.04	0	0	-	-	0	0	JUNK	0	0	56	1366.53	4321	166435	0.5186	70.4918	0	0	FALSE	FALSE	-1	-1	0	0	0	0	0	0	BASPBJ0794_pilon (Unplaced)	PURE|LOW|UNIQ|NON|REP|NONE	-	-	HPURGE	-	-	quarantine	1
BASENJISCAFF0609	3043	47	40.8232	100	3043	42	51	0.5497	0	27.24	72.76	0	BASENJISCAFF0964	BASENJISCAFF1038	39.07	69.08	KEEP	0	0	5	109.734	1611	18140.9	0.56622	93.1057	0	0	FALSE	FALSE	-1	-1	0	0	0	0	0	0	BASPBJ0795_pilon (Unplaced) Diploidocus:PRIMARY|PRIMARY|PRIMARY|PRIMARY|PRIMARY|PRIMARY	GOOD|DIP|PART|NON|REP|NONE	PURE|DIP|UNIQ|TOP|REP|NONE	PURE|DIP|UNIQ|SEC|REP|NONE	PRIMARY	PRIMARY	PRIMARY	keep	7
BASENJISCAFF0610	29377	166	182.981	100	29377	314	373	0.5028	0	0.102	17.64	82.26	-	-	0	0	JUNK	0	0	719	1086.56	311156	309617	0.50911	98.9234	0	0	FALSE	FALSE	-1	-1	0	0	0	0	0	0	BASPBJ0796_pilon (Unplaced) Diploidocus:COLLAPSED|COLLAPSED|COLLAPSED|COLLAPSED|COLLAPSED|COLLAPSED	PURE|EXS|UNIQ|NON|REP|NONE	-	-	COLLAPSED	-	-	repeat	7
BASENJISCAFF0611	512	1	0.7363	73.6328	377	1	0	0.55	100	0	0	0	-	-	0	0	JUNK	0	0	1	20.5247	0	3886.68	0.58789	37.037	0	0	FALSE	FALSE	-1	-1	0	0	0	0	0	0	BASPBJ0797_pilon (Unplaced)	LOWX|LOW|UNIQ|NON|PRI|NONE	-	-	LOWCOV	-	-	junk	1
BASENJISCAFF0612	1037	19	18.5429	100	1037	27	2	0.5125	0.193	82.26	17.55	0	BASENJISCAFF0401	BASENJISCAFF0143	56.32	67.89	KEEP	0	0	2	407.069	322	113007	0.5188	66.6667	0	0	FALSE	FALSE	-1	-1	0	0	0	0	0	0	BASPBJ0798_pilon (Unplaced) Diploidocus:PRIMARY	PURE|HAP|HOMO|NON|ALT|NONE	PURE|DIP|UNIQ|TOP|PRI|NONE	PURE|DIP|UNIQ|SEC|REP|NONE	HPURGE	PRIMARY	PRIMARY	quarantine	2
BASENJISCAFF0613	1873	44	39.8227	100	1873	32	40	0.5491	0	11	89	0	-	-	0	0	KEEP	0	1	7	106.419	5403	22844.8	0.55793	98.8089	0	0	FALSE	FALSE	-1	-1	0	0	0	0	0	0	BASPBJ0799_pilon (Unplaced) Diploidocus:PRIMARY|PRIMARY|PRIMARY|PRIMARY|PRIMARY|PRIMARY	PURE|DIP|UNIQ|SEC|REP|NONE	-	-	PRIMARY	-	-	keep	7
BASENJISCAFF0614	980	7	6.9847	100	980	12	2	0.5157	58.88	41.12	0	0	BASENJISCAFF0664	BASENJICHR11.02	64.8	168.57	KEEP	0	0	7	859.323	140	112169	0.51429	65.5136	0	0	FALSE	FALSE	-1	-1	0	0	0	0	0	0	BASPBJ0800_pilon (Unplaced)	GOOD|LOW|HOMO|NON|REP|NONE	GOOD|HAP|REPT|TOP|REP|NONE	GOOD|DIP|REPT|TOP|REP|NONE	HPURGE	PRIMARY	PRIMARY	quarantine	1
BASENJISCAFF0615	6150	167	135.987	100	6150	148	154	0.5523	1.659	12.05	10.15	76.15	BASENJISCAFF0320	BASENJICHR35.02	66.94	97.71	KEEP	1	0	41	167.702	10580	29744.7	0.57886	86.2672	0	0	FALSE	FALSE	-1	-1	0	0	0	0	0	0	BASPBJ0801_pilon (Unplaced) Diploidocus:COLLAPSED|COLLAPSED|COLLAPSED|COLLAPSED|COLLAPSED|COLLAPSED	GOOD|EXS|HOMO|TOP|REP|NONE	GOOD|DIP|REPT|TOP|REP|NONE	GOOD|EXS|REPT|TOP|REP|NONE	COLLAPSED	PRIMARY	PRIMARY	repeat	7
BASENJISCAFF0616	4500	101	107.338	99.7111	4487	142	144	0.5507	0.3996	2.289	13	84.31	-	-	0	0	JUNK	0	0	5	110.692	2106	19699.2	0.57378	89.1819	0	0	FALSE	FALSE	-1	-1	0	0	0	0	0	0	BASPBJ0802_pilon (Unplaced) Diploidocus:COLLAPSED|COLLAPSED|COLLAPSED|COLLAPSED|COLLAPSED|COLLAPSED	PURE|EXS|UNIQ|NON|REP|NONE	-	-	COLLAPSED	-	-	repeat	7
BASENJISCAFF0617	359	0	0	0	0	0	0	0	100	0	0	0	-	-	0	0	KEEP	0	0	1	1.28228	0	241.691	0.51532	10.8108	0	0	FALSE	FALSE	-1	-1	0	0	0	0	0	0	BASPBJ0803_pilon (Unplaced)	LOWX|LOW|UNIQ|NON|PRI|NONE	-	-	LOWCOV	-	-	junk	1
BASENJISCAFF0618	7726	13	16.682	100	7726	30	23	0.5084	8.284	65.58	26.13	0	BASENJISCAFF0299	BASENJISCAFF0473	94.11	876.29	KEEP	0	0	10	1146.7	1135	157257	0.51398	70.2338	0	0	FALSE	FALSE	-1	-1	0	0	0	0	0	0	BASPBJ0804_pilon (Unplaced) Diploidocus:PRIMARY|PRIMARY|PRIMARY|PRIMARY|PRIMARY|PRIMARY	GOOD|HAP|REPT|NON|REP|NONE	GOOD|EXS|REPT|TOP|REP|NONE	GOOD|EXS|REPT|TOP|REP|NONE	PRIMARY	PRIMARY	PRIMARY	keep	7
BASENJISCAFF0619	1921	23	19.4112	99.0109	1902	16	18	0.5515	16.45	68.45	15.1	0	BASENJICHR35.02	BASENJISCAFF0513	41.85	86.78	KEEP	0	0	1	71.3504	39	11767.1	0.56897	56.3061	0	0	FALSE	FALSE	-1	-1	0	0	0	0	0	0	BASPBJ0805_pilon (Unplaced)	GOOD|HAP|PART|NON|PRI|NONE	GOOD|EXS|REPT|TOP|REP|NONE	GOOD|EXS|REPT|TOP|REP|NONE	HPURGE	PRIMARY	COLLAPSED	quarantine	1
BASENJISCAFF0620	667	3	2.9625	100	667	3	1	0.5587	100	0	0	0	-	-	0	0	JUNK	0	0	1	31.0437	0	5183.01	0.58621	36.8175	0	0	FALSE	FALSE	-1	-1	0	0	0	0	0	0	BASPBJ0806_pilon (Unplaced)	PURE|LOW|UNIQ|NON|PRI|NONE	-	-	HPURGE	-	-	quarantine	1
BASENJISCAFF0621	3983	47	46.2147	99.6234	3968	36	53	0.5517	0.6775	9.064	88.93	1.331	-	-	0	0	KEEP	0	0	1	99.2451	290	18073.6	0.5526	73.2373	0	0	FALSE	FALSE	-1	-1	0	0	0	0	0	0	BASPBJ0809_pilon (Unplaced) Diploidocus:PRIMARY|PRIMARY|PRIMARY|PRIMARY|PRIMARY|PRIMARY	PURE|DIP|UNIQ|NON|PRI|NONE	-	-	PRIMARY	-	-	keep	7
BASENJISCAFF0622	2000	0	0	0	0	0	0	0	100	0	0	0	-	-	0	0	KEEP	0	0	1	30.8921	0	3664.95	0.5625	30.7497	0	0	FALSE	FALSE	-1	-1	0	0	0	0	0	0	BASPBJ0810_pilon (Unplaced)	LOWX|LOW|UNIQ|NON|PRI|NONE	-	-	LOWCOV	-	-	junk	1
BASENJISCAFF0623	1092	7	5.9396	99.9084	1091	0	8	0.5031	84.07	15.93	0	0	-	-	0	0	JUNK	0	0	1	500.824	0	63548.8	0.50458	45.591	0	0	FALSE	FALSE	-1	-1	0	0	0	0	0	0	BASPBJ0811_pilon (Unplaced)	PURE|LOW|UNIQ|NON|PRI|NONE	-	-	HPURGE	-	-	quarantine	1
BASENJISCAFF0624	5675	44	42.2095	100	5675	73	5	0.5096	0	1.78	98.22	0	-	-	0	0	KEEP	0	0	1	552.229	0	79362.5	0.51736	45.9373	0	0	FALSE	FALSE	-1	-1	0	0	0	0	0	0	BASPBJ0812_pilon (Unplaced) Diploidocus:PRIMARY|PRIMARY|PRIMARY|PRIMARY|PRIMARY|PRIMARY	PURE|DIP|UNIQ|NON|PRI|NONE	-	-	PRIMARY	-	-	keep	7
BASENJISCAFF0625	1690	18	16.6142	100	1690	9	20	0.552	3.669	96.33	0	0	BASENJICHR35.02	BASENJISCAFF0101	87.28	267.51	KEEP	0	0	6	144.81	2019	23439.4	0.57041	84.2548	0	0	FALSE	FALSE	-1	-1	0	0	0	0	0	0	BASPBJ0813_pilon (Unplaced)	PURE|HAP|REPT|NON|REP|NONE	GOOD|EXS|REPT|TOP|REP|NONE	GOOD|DIP|HOMO|SEC|ALT|NONE	HPURGE	PRIMARY	PRIMARY	quarantine	1
BASENJISCAFF0626	2189	14	14.3572	100	2189	11	13	0.5077	0.594	99.41	0	0	BASENJISCAFF0585	BASENJISCAFF0155	61.76	720.47	KEEP	0	1	564	954.396	269500	259359	0.52307	79.3805	0	0	FALSE	FALSE	-1	-1	0	0	0	0	0	0	BASPBJ0814_pilon (Unplaced)	PURE|HAP|REPT|SEC|REP|NONE	WEAK|DIP|REPT|TOP|REP|NONE	GOOD|DIP|REPT|SEC|REP|NONE	HPURGE	PRIMARY	PRIMARY	quarantine	1
BASENJISCAFF0627	10039	35	33.5981	100	10039	45	34	0.5082	0.05	26.2	73.75	0	BASENJISCAFF0015	BASENJISCAFF0572	95.66	2763.08	REPEAT	0	0	1992	2096.15	227191	297333	0.5129	99.4907	0	0	FALSE	FALSE	-1	-1	0	0	0	0	0	0	BASPBJ0815_pilon (Unplaced) Diploidocus:PRIMARY|PRIMARY|PRIMARY|PRIMARY|PRIMARY|PRIMARY	GOOD|DIP|REPT|NON|REP|NONE	GOOD|EXS|REPT|TOP|REP|NONE	GOOD|DIP|REPT|TOP|REP|NONE	PRIMARY	PRIMARY	PRIMARY	keep	7
BASENJISCAFF0628	1416	5	5.5629	100	1416	9	2	0.5479	76.84	23.16	0	0	BASENJICHR35.02	BASENJISCAFF0680	91.38	147.95	KEEP	0	0	1	40.2727	0	6413.19	0.57274	38.0575	0	0	FALSE	FALSE	-1	-1	0	0	0	0	0	0	BASPBJ0816_pilon (Unplaced)	GOOD|LOW|HOMO|NON|PRI|NONE	GOOD|EXS|REPT|TOP|REP|NONE	GOOD|DIP|REPT|SEC|REP|NONE	HPURGE	PRIMARY	PRIMARY	quarantine	1
BASENJISCAFF0629	388	1	1	100	388	1	0	0.2799	100	0	0	0	-	-	0	0	JUNK	0	0	1	1.29282	0	43.2541	0.27577	34.2541	0	0	FALSE	FALSE	-1	-1	0	0	0	0	0	0	BASPBJ0817_pilon (Unplaced)	LOWX|LOW|UNIQ|NON|PRI|NONE	-	-	LOWCOV	-	-	junk	1
BASENJISCAFF0630	418	1	2.5574	100	418	5	0	0.4052	100	0	0	0	-	-	0	0	JUNK	0	0	4	1960.2	24	75251.9	0.43301	61.9898	0	0	FALSE	FALSE	-1	-1	0	0	0	0	0	0	BASPBJ0818_pilon (Unplaced)	LOWX|LOW|UNIQ|NON|REP|NONE	-	-	LOWCOV	-	-	junk	1
BASENJISCAFF0631	2630	6	5.5616	100	2630	7	2	0.3825	100	0	0	0	-	-	0	0	JUNK	0	0	1	521.269	0	17036.5	0.38061	47.8495	0	0	FALSE	FALSE	-1	-1	0	0	0	0	0	0	BASPBJ0819_pilon (Unplaced)	PURE|LOW|UNIQ|NON|PRI|NONE	-	-	HPURGE	-	-	quarantine	1
BASENJISCAFF0632	6730	217	221.456	100	6730	325	309	0.5512	0	0	0.282	99.72	-	-	0	0	JUNK	0	0	129	202.342	14814	31417	0.58529	90.2148	0	0	FALSE	FALSE	-1	-1	0	0	0	0	0	0	BASPBJ0820_pilon (Unplaced) Diploidocus:COLLAPSED|COLLAPSED|COLLAPSED|COLLAPSED|COLLAPSED|COLLAPSED	PURE|EXS|UNIQ|NON|REP|NONE	-	-	COLLAPSED	-	-	repeat	7
BASENJISCAFF0633	4414	11	10.9024	100	4414	16	1	0.5078	2.379	97.62	0	0	BASENJISCAFF0299	BASENJISCAFF0624	95.11	345.33	REPEAT	0	0	1	441.062	0	51396.3	0.51767	36.9872	0	0	FALSE	FALSE	-1	-1	0	0	0	0	0	0	BASPBJ0821_pilon (Unplaced)	PURE|HAP|REPT|NON|PRI|NONE	GOOD|EXS|REPT|TOP|REP|NONE	PURE|DIP|UNIQ|TOP|PRI|NONE	HPURGE	COLLAPSED	PRIMARY	quarantine	1
BASENJISCAFF0634	5471	77	75.3623	100	5471	185	28	0.5061	0	0.969	31.64	67.39	BASENJISCAFF0710	BASENJISCAFF0473	98.01	8365.98	REPEAT	0	0	448	907.294	245341	255871	0.51325	83.6731	0	0	FALSE	FALSE	-1	-1	0	0	0	0	0	0	BASPBJ0822_pilon (Unplaced) Diploidocus:PRIMARY|PRIMARY|PRIMARY|PRIMARY|PRIMARY|PRIMARY	GOOD|EXS|REPT|NON|REP|NONE	GOOD|DIP|REPT|TOP|REP|NONE	GOOD|EXS|REPT|TOP|REP|NONE	PRIMARY	PRIMARY	PRIMARY	keep	7
BASENJISCAFF0635	4514	10	10.6287	100	4514	22	1	0.5149	0.709	99.29	0	0	BASENJISCAFF0473	BASENJISCAFF0269	97.3	3500.44	REPEAT	0	0	1	435.856	0	55217.8	0.52459	35.4278	0	0	FALSE	FALSE	-1	-1	0	0	0	0	0	0	BASPBJ0824_pilon (Unplaced)	PURE|HAP|REPT|NON|PRI|NONE	GOOD|EXS|REPT|TOP|REP|NONE	WEAK|EXS|REPT|TOP|REP|NONE	HPURGE	PRIMARY	PRIMARY	quarantine	1
BASENJISCAFF0636	11576	546	484.151	100	11576	665	775	0.5492	0.285	0.155	1.546	98.01	-	-	0	0	JUNK	0	0	6	2215.11	2747	60244.2	0.58518	87.7229	0	0	FALSE	FALSE	-1	-1	0	0	0	0	0	0	BASPBJ0827_pilon (Unplaced) Diploidocus:COLLAPSED|COLLAPSED|COLLAPSED|COLLAPSED|COLLAPSED|COLLAPSED	PURE|EXS|UNIQ|NON|REP|NONE	-	-	COLLAPSED	-	-	repeat	7
BASENJISCAFF0637	3158	16	14.7638	100	3158	14	9	0.5136	2.312	97.69	0	0	BASENJISCAFF0473	BASENJISCAFF0461	72.36	149.4	KEEP	0	0	1776	1856.04	190150	233927	0.5133	95.2107	0	0	FALSE	FALSE	-1	-1	0	0	0	0	0	0	BASPBJ0828_pilon (Unplaced)	PURE|HAP|HOMO|NON|REP|NONE	GOOD|EXS|REPT|TOP|REP|NONE	GOOD|DIP|REPT|TOP|REP|NONE	HPURGE	PRIMARY	PRIMARY	quarantine	1
BASENJISCAFF0638	2618	196	183.421	99.5416	2606	145	142	0.5501	0.9929	0.03783	0.1145	98.85	-	-	0	0	JUNK	0	0	6	117.558	2795	23039.8	0.5699	98.1867	0	0	FALSE	FALSE	-1	-1	0	0	0	0	0	0	BASPBJ0829_pilon (Unplaced) Diploidocus:COLLAPSED|COLLAPSED|COLLAPSED|COLLAPSED|COLLAPSED|COLLAPSED	PURE|EXS|UNIQ|NON|REP|NONE	-	-	COLLAPSED	-	-	repeat	7
BASENJISCAFF0639	415	1	1.8434	100	415	2	1	0.5532	100	0	0	0	-	-	0	0	JUNK	0	0	1	18.0668	394	3899.64	0.56867	97.6864	0	0	FALSE	FALSE	-1	-1	0	0	0	0	0	0	BASPBJ0830_pilon (Unplaced)	LOWX|LOW|UNIQ|NON|PRI|NONE	-	-	LOWCOV	-	-	junk	1
BASENJISCAFF0640	3812	104	145.594	100	3812	171	146	0.3965	0.079	0	0.079	99.84	-	-	0	0	JUNK	0	0	281	2803.48	20003	104083	0.39795	92.261	0	0	FALSE	FALSE	-1	-1	0	0	0	0	0	0	BASPBJ0831_pilon (Unplaced) Diploidocus:COLLAPSED|COLLAPSED|COLLAPSED|COLLAPSED|COLLAPSED|COLLAPSED	PURE|EXS|UNIQ|NON|REP|NONE	-	-	COLLAPSED	-	-	repeat	7
BASENJISCAFF0641	2175	30	26.1223	99.954	2174	28	27	0.5493	12	24.78	63.22	0	BASENJICHR35.02	BASENJISCAFF0696	65.43	239.26	KEEP	0	1	3	100.231	1361	19775.4	0.56598	80.3164	0	0	FALSE	FALSE	-1	-1	0	0	0	0	0	0	BASPBJ0833_pilon (Unplaced) Diploidocus:PRIMARY|PRIMARY|PRIMARY|PRIMARY|PRIMARY|PRIMARY	GOOD|DIP|HOMO|SEC|REP|NONE	GOOD|EXS|REPT|TOP|REP|NONE	WEAK|HAP|PART|SEC|PRI|NONE	PRIMARY	PRIMARY	KEEP	keep	7
BASENJISCAFF0642	11735	64	83.2868	100	11735	325	4	0.509	0	1.96	51.92	46.12	BASENJISCAFF0299	BASENJISCAFF0664	99.28	1778.44	REPEAT	0	0	54	1291.11	2799	178135	0.51547	68.8616	0	0	FALSE	FALSE	-1	-1	0	0	0	0	0	0	BASPBJ0834_pilon (Unplaced) Diploidocus:PRIMARY|PRIMARY|PRIMARY|PRIMARY|PRIMARY|PRIMARY	GOOD|DIP|REPT|NON|REP|NONE	GOOD|EXS|REPT|TOP|REP|NONE	GOOD|HAP|REPT|TOP|REP|NONE	PRIMARY	PRIMARY	PRIMARY	keep	7
BASENJISCAFF0643	963	7	7.0395	100	963	9	1	0.5186	60.13	39.88	0	0	BASENJISCAFF0135	BASENJISCAFF1003	32.5	96.37	KEEP	0	0	201	1533.5	29545	195077	0.52648	80.4696	0	0	FALSE	FALSE	-1	-1	0	0	0	0	0	0	BASPBJ0835_pilon (Unplaced)	GOOD|LOW|PART|NON|REP|NONE	WEAK|LOW|REPT|TOP|REP|NONE	PURE|HAP|REPT|SEC|REP|NONE	HPURGE	KEEP	HPURGE	quarantine	1
BASENJISCAFF0644	12689	44	48.7293	100	12689	37	186	0.4974	0.102	1.064	83.32	15.52	-	-	0	0	KEEP	0	1	1	520.525	0	40138.3	0.4961	43.3231	0	0	FALSE	FALSE	-1	-1	0	0	0	0	0	0	BASPBJ0839_pilon (Unplaced) Diploidocus:PRIMARY|PRIMARY|PRIMARY|PRIMARY|PRIMARY|PRIMARY	PURE|DIP|UNIQ|SEC|PRI|NONE	-	-	PRIMARY	-	-	keep	7
BASENJISCAFF0645	546	2	1.9927	100	546	2	0	0.5108	100	0	0	0	-	-	0	0	JUNK	0	0	2	666.733	1	94263.9	0.52381	50.5769	0	0	FALSE	FALSE	-1	-1	0	0	0	0	0	0	BASPBJ0841_pilon (Unplaced)	LOWX|LOW|UNIQ|NON|ALT|NONE	-	-	LOWCOV	-	-	junk	1
BASENJISCAFF0646	3223	24	22.6727	100	3223	18	17	0.5043	0	62.77	37.23	0	BASENJICHR11.02	BASENJISCAFF0473	98.36	1413.16	REPEAT	0	0	1820	1945.65	208913	267265	0.51226	96.9972	0	0	FALSE	FALSE	-1	-1	0	0	0	0	0	0	BASPBJ0842_pilon (Unplaced) Diploidocus:PRIMARY|PRIMARY|PRIMARY|PRIMARY|PRIMARY|PRIMARY	GOOD|HAP|REPT|NON|REP|NONE	GOOD|DIP|REPT|TOP|REP|NONE	GOOD|EXS|REPT|TOP|REP|NONE	PRIMARY	PRIMARY	PRIMARY	keep	7
BASENJISCAFF0647	491	3	2.4155	98.3707	483	1	2	0.5421	100	0	0	0	-	-	0	0	JUNK	0	0	1	2.43441	0	276.888	0.55397	16.3441	0	0	FALSE	FALSE	-1	-1	0	0	0	0	0	0	BASPBJ0843_pilon (Unplaced)	PURE|LOW|UNIQ|NON|PRI|NONE	-	-	LOWQUAL	-	-	quarantine	1
BASENJISCAFF0648	1107	1	1.1906	80.8491	895	2	0	0.5667	100	0	0	0	-	-	0	0	JUNK	0	0	1	9.12858	0	1486.51	0.57091	21.0916	0	0	FALSE	FALSE	-1	-1	0	0	0	0	0	0	BASPBJ0846_pilon (Unplaced)	LOWX|LOW|UNIQ|NON|PRI|NONE	-	-	LOWCOV	-	-	junk	1
BASENJISCAFF0649	2640	19	17.2011	99.9621	2639	19	20	0.551	8.258	91.74	0	0	BASENJICHR1.02	BASENJICHR35.02	55.23	231.7	KEEP	0	2	5	123.426	2225	23028.9	0.56818	92.4254	0	0	FALSE	FALSE	-1	-1	0	0	0	0	0	0	BASPBJ0848_pilon (Unplaced)	PURE|HAP|HOMO|SEC|REP|NONE	GOOD|DIP|REPT|TOP|REP|NONE	GOOD|EXS|REPT|TOP|REP|NONE	HPURGE	PRIMARY	PRIMARY	quarantine	1
BASENJISCAFF0650	1163	2	1.65	92.7773	1079	3	2	0.5564	100	0	0	0	-	-	0	0	JUNK	0	0	1	17.5761	0	1448.72	0.57352	23.9226	0	0	FALSE	FALSE	-1	-1	0	0	0	0	0	0	BASPBJ0849_pilon (Unplaced)	LOWX|LOW|UNIQ|NON|PRI|NONE	-	-	LOWCOV	-	-	junk	1
BASENJISCAFF0651	1240	26	25.5798	100	1240	12	16	0.554	0	16.86	83.15	0	-	-	0	0	KEEP	0	1	2	90.9267	894	15550.9	0.56613	100	0	0	FALSE	FALSE	-1	-1	0	0	0	0	0	0	BASPBJ0850_pilon (Unplaced) Diploidocus:PRIMARY|PRIMARY|PRIMARY|PRIMARY|PRIMARY|PRIMARY	PURE|DIP|UNIQ|SEC|ALT|NONE	-	-	PRIMARY	-	-	keep	7
BASENJISCAFF0652	6084	343	312.04	100	6084	317	289	0.5487	6.986	0.197	0.016	92.8	-	-	0	0	JUNK	0	0	3	122.964	1749	18849.5	0.56476	94.0905	0	0	FALSE	FALSE	-1	-1	0	0	0	0	0	0	BASPBJ0851_pilon (Unplaced) Diploidocus:COLLAPSED|COLLAPSED|COLLAPSED|COLLAPSED|COLLAPSED|COLLAPSED	PURE|EXS|UNIQ|NON|REP|NONE	-	-	COLLAPSED	-	-	repeat	7
BASENJISCAFF0653	511	0	0.4149	41.4873	212	0	1	0.5347	100	0	0	0	-	-	0	0	JUNK	0	0	1	6.06598	0	1298.85	0.55773	21.2371	0	0	FALSE	FALSE	-1	-1	0	0	0	0	0	0	BASPBJ0853_pilon (Unplaced)	LOWX|LOW|UNIQ|NON|PRI|NONE	-	-	LOWCOV	-	-	junk	1
BASENJISCAFF0654	1049	1	1	100	1049	0	1	0.6676	100	0	0	0	-	-	0	0	JUNK	0	0	1	1.05865	0	2.21603	0.66826	2.8348	0	0	FALSE	FALSE	-1	-1	0	0	0	0	0	0	BASPBJ0854_pilon (Unplaced)	LOWX|LOW|UNIQ|NON|PRI|NONE	-	-	LOWCOV	-	-	junk	1
BASENJISCAFF0655	4103	239	203.132	99.0007	4062	228	203	0.5469	1.755	2.486	12.43	83.33	-	-	0	0	JUNK	0	0	6	112.308	3354	21526.5	0.56447	94.9718	0	0	FALSE	FALSE	-1	-1	0	0	0	0	0	0	BASPBJ0855_pilon (Unplaced) Diploidocus:COLLAPSED|COLLAPSED|COLLAPSED|COLLAPSED|COLLAPSED|COLLAPSED	PURE|EXS|UNIQ|NON|REP|NONE	-	-	COLLAPSED	-	-	repeat	7
BASENJISCAFF0656	1878	1	1.106	100	1878	1	1	0.3296	100	0	0	0	-	-	0	0	JUNK	0	0	1	1694.9	0	50798.2	0.32641	45.0864	0	0	FALSE	FALSE	-1	-1	0	0	0	0	0	0	BASPBJ0857_pilon (Unplaced)	LOWX|LOW|UNIQ|NON|PRI|NONE	-	-	LOWCOV	-	-	junk	1
BASENJISCAFF0657	1099	4	3.2102	100	1099	3	2	0.55	100	0	0	0	-	-	0	0	JUNK	0	0	1	29.5853	0	4946.58	0.57689	44.8276	0	0	FALSE	FALSE	-1	-1	0	0	0	0	0	0	BASPBJ0859_pilon (Unplaced)	PURE|LOW|UNIQ|NON|PRI|NONE	-	-	HPURGE	-	-	quarantine	1
BASENJISCAFF0658	3606	42	45.5261	100	3606	56	78	0.5489	0.804	3.245	92.85	3.106	-	-	0	0	KEEP	0	1	6	95.5408	3012	17956.2	0.5721	87.4022	0	0	FALSE	FALSE	-1	-1	0	0	0	0	0	0	BASPBJ0860_pilon (Unplaced) Diploidocus:PRIMARY|PRIMARY|PRIMARY|PRIMARY|PRIMARY|PRIMARY	PURE|DIP|UNIQ|SEC|REP|NONE	-	-	PRIMARY	-	-	keep	7
BASENJISCAFF0659	746	33	29.311	100	746	22	21	0.5465	0.268	34.99	64.75	0	BASENJISCAFF0483	BASENJISCAFF0766	82.04	84.05	KEEP	0	0	2	99.9694	1058	13168.9	0.55764	81.6667	0	0	FALSE	FALSE	-1	-1	0	0	0	0	0	0	BASPBJ0861_pilon (Unplaced) Diploidocus:PRIMARY|PRIMARY|PRIMARY|PRIMARY|PRIMARY|PRIMARY	GOOD|DIP|HOMO|NON|ALT|NONE	GOOD|HAP|REPT|TOP|PRI|NONE	GOOD|DIP|REPT|SEC|REP|NONE	PRIMARY	KEEP	PRIMARY	keep	7
BASENJISCAFF0660	25315	13	19.488	99.996	25314	70	110	0.5533	21.79	48.61	24.37	5.222	BASENJICHR35.02	BASENJICHR29.01	80.09	194.84	KEEP	0	0	1	107.577	0	5427.26	0.54335	16.5764	0	0	FALSE	FALSE	-1	-1	0	0	0	0	0	0	BASPBJ0862_pilon (Unplaced) Diploidocus:PRIMARY|PRIMARY|PRIMARY|PRIMARY|PRIMARY|PRIMARY	WEAK|HAP|HOMO|NON|PRI|NONE	GOOD|EXS|REPT|TOP|REP|NONE	PURE|DIP|UNIQ|TOP|PRI|COMP	PRIMARY	PRIMARY	PRIMARY	keep	7
BASENJISCAFF0661	4200	1	1.491	100	4200	3	0	0.415	100	0	0	0	-	-	0	0	JUNK	0	0	1	1.50072	0	29.0228	0.4119	25.7547	0	0	FALSE	FALSE	-1	-1	0	0	0	0	0	0	BASPBJ0863_pilon (Unplaced)	LOWX|LOW|UNIQ|NON|PRI|NONE	-	-	LOWCOV	-	-	junk	1
BASENJISCAFF0662	563	1	0.9343	93.4281	526	0	1	0.4941	100	0	0	0	-	-	0	0	JUNK	0	0	2	491.056	4	140646	0.50622	55.6797	0	0	FALSE	FALSE	-1	-1	0	0	0	0	0	0	BASPBJ0865_pilon (Unplaced)	LOWX|LOW|UNIQ|NON|ALT|NONE	-	-	LOWCOV	-	-	junk	1
BASENJISCAFF0663	1201	31	31.4696	100	1201	32	25	0.5476	0	12.99	87.01	0	-	-	0	0	KEEP	1	0	6	111.204	4476	23495.4	0.57202	98.1277	0	0	FALSE	FALSE	-1	-1	0	0	0	0	0	0	BASPBJ0866_pilon (Unplaced) Diploidocus:PRIMARY|PRIMARY|PRIMARY|PRIMARY|PRIMARY|PRIMARY	PURE|DIP|UNIQ|TOP|REP|NONE	-	-	PRIMARY	-	-	keep	7
BASENJISCAFF0664	145956	24	151.289	100	145956	209	2302	0.5087	0.014	54.06	23.29	22.63	BASENJISCAFF0299	BASENJICHR11.02	88.34	845.5	KEEP	7	8	1781	1983.93	207430	259853	0.51251	97.2871	0	0	FALSE	FALSE	-1	-1	0	0	0	0	0	0	BASPBJ0867_pilon (Unplaced) Diploidocus:PRIMARY|PRIMARY|PRIMARY|PRIMARY|PRIMARY|PRIMARY	GOOD|HAP|REPT|TOP|REP|NONE	GOOD|EXS|REPT|TOP|REP|NONE	GOOD|DIP|REPT|TOP|REP|NONE	PRIMARY	PRIMARY	PRIMARY	keep	7
BASENJISCAFF0665	45345	47	61.1003	100	45345	204	207	0.5093	0	5.385	70.38	24.24	BASENJISCAFF0325	BASENJISCAFF0370	99.8	1035.1	REPEAT	0	0	1824	2131.88	210463	267816	0.51386	99.6403	0	0	FALSE	FALSE	-1	-1	0	0	0	0	0	0	BASPBJ0868_pilon (Unplaced) Diploidocus:PRIMARY|PRIMARY|PRIMARY|PRIMARY|PRIMARY|PRIMARY	GOOD|DIP|REPT|NON|REP|NONE	GOOD|EXS|REPT|TOP|REP|NONE	PURE|DIP|UNIQ|TOP|REP|NONE	PRIMARY	PRIMARY	PRIMARY	keep	7
BASENJISCAFF0666	2546	60	58.1807	96.8971	2467	51	67	0.5447	3.143	0.5106	60.84	35.51	BASENJICHR35.02	BASENJICHR1.02	91.67	546.54	KEEP	0	0	3	101.277	2131	19174.3	0.56441	96.8651	0	0	FALSE	FALSE	-1	-1	0	0	0	0	0	0	BASPBJ0869_pilon (Unplaced) Diploidocus:PRIMARY|PRIMARY|PRIMARY|PRIMARY|PRIMARY|PRIMARY	GOOD|DIP|REPT|NON|REP|NONE	GOOD|EXS|REPT|TOP|REP|NONE	WEAK|DIP|REPT|TOP|REP|NONE	PRIMARY	PRIMARY	PRIMARY	keep	7
BASENJISCAFF0667	2906	4	5.5719	100	2906	6	9	0.5082	71.96	28.04	0	0	BASENJISCAFF0015	BASENJISCAFF0471	95.87	1421.27	KEEP	0	0	2114	2142.09	224986	275862	0.51514	89.1667	0	0	FALSE	FALSE	-1	-1	0	0	0	0	0	0	BASPBJ0870_pilon (Unplaced)	GOOD|LOW|REPT|NON|REP|NONE	GOOD|EXS|REPT|TOP|REP|NONE	GOOD|HAP|REPT|TOP|REP|NONE	HPURGE	PRIMARY	PRIMARY	quarantine	1
BASENJISCAFF0668	8273	147	135.798	99.9516	8269	198	153	0.5513	0.2293	0.4468	20.01	79.32	BASENJICHR29.01	BASENJICHR35.02	91.82	271.75	KEEP	0	2	244	184.816	34735	33047.6	0.57246	91.0634	0	0	FALSE	FALSE	-1	-1	0	0	0	0	0	0	BASPBJ0871_pilon (Unplaced) Diploidocus:COLLAPSED|PRIMARY|PRIMARY|COLLAPSED|PRIMARY|PRIMARY	GOOD|EXS|REPT|SEC|REP|NONE	PURE|DIP|UNIQ|TOP|PRI|COMP	GOOD|EXS|REPT|TOP|REP|NONE	PRIMARY	PRIMARY	PRIMARY	keep	7
BASENJISCAFF0669	2353	15	12.7569	100	2353	20	8	0.5465	29.41	70.59	0	0	BASENJICHR35.02	BASENJICHR1.02	64.56	128.73	KEEP	0	1	5	171.942	291	26475.3	0.56439	60.722	0	0	FALSE	FALSE	-1	-1	0	0	0	0	0	0	BASPBJ0872_pilon (Unplaced)	GOOD|HAP|HOMO|SEC|REP|NONE	GOOD|EXS|REPT|TOP|REP|NONE	GOOD|DIP|REPT|TOP|REP|NONE	HPURGE	PRIMARY	PRIMARY	quarantine	1
BASENJISCAFF0670	702	5	4.6866	100	702	1	4	0.5503	100	0	0	0	-	-	0	0	JUNK	0	0	1	10.2145	0	1996.68	0.57407	16.1243	0	0	FALSE	FALSE	-1	-1	0	0	0	0	0	0	BASPBJ0873_pilon (Unplaced)	PURE|LOW|UNIQ|NON|PRI|NONE	-	-	HPURGE	-	-	quarantine	1
BASENJISCAFF0671	1464	27	27.3204	99.8634	1462	20	25	0.549	1.024	32.86	66.12	0	BASENJICHR35.02	BASENJISCAFF0413	84.29	217.83	KEEP	0	2	3	64.644	1110	12059.1	0.56284	93.1154	0	0	FALSE	FALSE	-1	-1	0	0	0	0	0	0	BASPBJ0874_pilon (Unplaced) Diploidocus:PRIMARY|PRIMARY|PRIMARY|PRIMARY|PRIMARY|PRIMARY	GOOD|DIP|HOMO|SEC|REP|NONE	GOOD|EXS|REPT|TOP|REP|NONE	GOOD|DIP|REPT|SEC|REP|NONE	PRIMARY	PRIMARY	PRIMARY	keep	7
BASENJISCAFF0672	3052	70	61.4443	100	3052	13	152	0.4991	8.388	27.56	12.91	51.15	BASENJISCAFF0707	BASENJISCAFF0720	41.12	55.9	KEEP	0	0	505	1473.9	194506	217236	0.48165	77.7594	0	0	FALSE	FALSE	-1	-1	0	0	0	0	0	0	BASPBJ0876_pilon (Unplaced) Diploidocus:PRIMARY|KEEP|COLLAPSED|COLLAPSED|COLLAPSED|COLLAPSED	GOOD|EXS|PART|NON|REP|NONE	PURE|DIP|UNIQ|TOP|REP|NONE	GOOD|DIP|REPT|SEC|REP|NONE	COLLAPSED	PRIMARY	PRIMARY	repeat	7
BASENJISCAFF0673	1920	75	75.8661	100	1920	107	50	0.504	0	0.781	20.78	78.44	BASENJISCAFF0572	BASENJISCAFF0404	75.52	469.84	KEEP	0	0	220	804.749	70528	214654	0.50885	88.226	0	0	FALSE	FALSE	-1	-1	0	0	0	0	0	0	BASPBJ0877_pilon (Unplaced) Diploidocus:COLLAPSED|PRIMARY|PRIMARY|PRIMARY|PRIMARY|PRIMARY	GOOD|EXS|REPT|NON|REP|NONE	GOOD|DIP|REPT|TOP|REP|NONE	WEAK|DIP|REPT|SEC|REP|NONE	PRIMARY	PRIMARY	PRIMARY	keep	7
BASENJISCAFF0674	486	8	8.2757	100	486	12	0	0.5189	12.76	87.24	0	0	BASENJISCAFF0644	BASENJISCAFF0634	34.98	97.33	KEEP	0	0	1	274.676	11	88598.1	0.51852	56.9565	0	0	FALSE	FALSE	-1	-1	0	0	0	0	0	0	BASPBJ0878_pilon (Unplaced)	PURE|HAP|PART|NON|PRI|NONE	PURE|DIP|UNIQ|TOP|PRI|NONE	PURE|DIP|UNIQ|TOP|REP|NONE	LOWQUAL	PRIMARY	PRIMARY	quarantine	1
BASENJISCAFF0675	1374	18	16.1164	100	1374	22	2	0.504	0.218	99.78	0	0	BASENJISCAFF0664	BASENJISCAFF0024	40.32	89.37	KEEP	0	1	1	246.389	0	34250.3	0.52038	33.6795	0	0	FALSE	FALSE	-1	-1	0	0	0	0	0	0	BASPBJ0879_pilon (Unplaced)	PURE|HAP|PART|SEC|PRI|NONE	GOOD|HAP|REPT|TOP|REP|NONE	GOOD|LOW|REPT|SEC|PRI|NONE	HPURGE	PRIMARY	HPURGE	quarantine	1
BASENJISCAFF0676	2669	42	39.6467	100	2669	42	35	0.5496	1.199	0.337	98.46	0	-	-	0	0	KEEP	0	0	3	99.6042	1349	18208.7	0.55901	98.6001	0	0	FALSE	FALSE	-1	-1	0	0	0	0	0	0	BASPBJ0881_pilon (Unplaced) Diploidocus:PRIMARY|PRIMARY|PRIMARY|PRIMARY|PRIMARY|PRIMARY	PURE|DIP|UNIQ|NON|REP|NONE	-	-	PRIMARY	-	-	keep	7
BASENJISCAFF0677	2358	1	1.1722	69.0416	1628	3	0	0.4401	100	0	0	0	-	-	0	0	JUNK	0	0	1	141.765	0	4001.22	0.43384	26.7153	0	0	FALSE	FALSE	-1	-1	0	0	0	0	0	0	BASPBJ0882_pilon (Unplaced)	LOWX|LOW|UNIQ|NON|PRI|NONE	-	-	LOWCOV	-	-	junk	1
BASENJISCAFF0678	1325	2	2.2083	100	1325	2	1	0.5136	100	0	0	0	-	-	0	0	JUNK	0	0	778	1109.93	300035	283489	0.51019	81.7552	0	0	FALSE	FALSE	-1	-1	0	0	0	0	0	0	BASPBJ0883_pilon (Unplaced)	LOWX|LOW|UNIQ|NON|REP|NONE	-	-	LOWCOV	-	-	junk	1
BASENJISCAFF0679	2462	18	18.2319	98.5378	2426	13	27	0.5505	1.462	98.54	0	0	BASENJICHR35.02	BASENJICHR1.02	91.63	471.89	KEEP	0	0	2	348.875	922	21286.1	0.56255	75.3695	0	0	FALSE	FALSE	-1	-1	0	0	0	0	0	0	BASPBJ0884_pilon (Unplaced)	PURE|HAP|REPT|NON|ALT|NONE	GOOD|EXS|REPT|TOP|REP|NONE	GOOD|DIP|REPT|TOP|REP|NONE	HPURGE	PRIMARY	PRIMARY	quarantine	1
BASENJISCAFF0680	2619	49	44.693	100	2619	40	53	0.5522	6.147	20.12	68.92	4.811	BASENJICHR35.02	BASENJICHR29.01	90.95	260.63	KEEP	0	1	6	112.467	2637	18974.1	0.57045	92.5569	0	0	FALSE	FALSE	-1	-1	0	0	0	0	0	0	BASPBJ0885_pilon (Unplaced) Diploidocus:PRIMARY|PRIMARY|PRIMARY|PRIMARY|PRIMARY|PRIMARY	GOOD|DIP|REPT|SEC|REP|NONE	GOOD|EXS|REPT|TOP|REP|NONE	PURE|DIP|UNIQ|TOP|PRI|COMP	PRIMARY	PRIMARY	PRIMARY	keep	7
BASENJISCAFF0681	23277	314	301.163	100	23277	25	728	0.5104	0	0	0.047	99.95	-	-	0	0	JUNK	0	0	254	1409.62	30476	194297	0.51884	78.917	0	0	FALSE	FALSE	-1	-1	0	0	0	0	0	0	BASPBJ0886_pilon (Unplaced) Diploidocus:COLLAPSED|COLLAPSED|COLLAPSED|COLLAPSED|COLLAPSED|COLLAPSED	PURE|EXS|UNIQ|NON|REP|NONE	-	-	COLLAPSED	-	-	repeat	7
BASENJISCAFF0682	4182	74	69.1267	100	4182	71	64	0.5527	0.454	0.048	41.73	57.77	BASENJICHR35.02	BASENJICHR1.02	97.75	470.71	REPEAT	0	0	3	85.4396	1090	16233.9	0.57006	88.1376	0	0	FALSE	FALSE	-1	-1	0	0	0	0	0	0	BASPBJ0887_pilon (Unplaced) Diploidocus:PRIMARY|PRIMARY|PRIMARY|PRIMARY|PRIMARY|PRIMARY	GOOD|EXS|REPT|NON|REP|NONE	GOOD|EXS|REPT|TOP|REP|NONE	WEAK|DIP|REPT|TOP|REP|NONE	PRIMARY	PRIMARY	PRIMARY	keep	7
BASENJISCAFF0683	4590	1	0.7333	73.3333	3366	1	0	0.5068	100	0	0	0	-	-	0	0	JUNK	0	0	1	3.93668	0	90.5808	0.52767	21.0123	0	0	FALSE	FALSE	-1	-1	0	0	0	0	0	0	BASPBJ0888_pilon (Unplaced)	LOWX|LOW|UNIQ|NON|PRI|NONE	-	-	LOWCOV	-	-	junk	1
BASENJISCAFF0684	2658	63	56.3518	99.5862	2647	57	43	0.5496	0.5264	7.186	55.79	36.49	BASENJICHR35.02	BASENJISCAFF1056	64.67	344.96	KEEP	0	0	6	135.493	3124	24934.2	0.57073	84.5745	0	0	FALSE	FALSE	-1	-1	0	0	0	0	0	0	BASPBJ0889_pilon (Unplaced) Diploidocus:PRIMARY|PRIMARY|PRIMARY|PRIMARY|PRIMARY|PRIMARY	GOOD|DIP|REPT|NON|REP|NONE	GOOD|EXS|REPT|TOP|REP|NONE	GOOD|DIP|HOMO|TOP|PRI|NONE	PRIMARY	PRIMARY	PRIMARY	keep	7
BASENJISCAFF0685	14142	24	39.8944	100	14142	109	69	0.5106	12.57	41.23	25.34	20.87	BASENJISCAFF0473	BASENJISCAFF0269	98.89	4432.82	KEEP	0	0	1849	1999.91	214696	273315	0.51796	90.2947	0	0	FALSE	FALSE	-1	-1	0	0	0	0	0	0	BASPBJ0890_pilon (Unplaced) Diploidocus:PRIMARY|PRIMARY|PRIMARY|PRIMARY|PRIMARY|PRIMARY	WEAK|HAP|REPT|NON|REP|NONE	GOOD|EXS|REPT|TOP|REP|NONE	WEAK|EXS|REPT|TOP|REP|NONE	PRIMARY	PRIMARY	PRIMARY	keep	7
BASENJISCAFF0686	2045	67	54.9208	97.2127	1988	51	59	0.5589	2.836	4.89	53.06	39.22	BASENJICHR35.02	BASENJISCAFF0680	90.07	130.81	KEEP	0	1	8	117.868	3258	19883.1	0.57213	94.9975	0	0	FALSE	FALSE	-1	-1	0	0	0	0	0	0	BASPBJ0891_pilon (Unplaced) Diploidocus:PRIMARY|PRIMARY|PRIMARY|PRIMARY|PRIMARY|PRIMARY	GOOD|DIP|HOMO|SEC|REP|NONE	GOOD|EXS|REPT|TOP|REP|NONE	GOOD|DIP|REPT|SEC|REP|NONE	PRIMARY	PRIMARY	PRIMARY	keep	7
BASENJISCAFF0687	612	2	1.7908	100	612	2	1	0.4879	100	0	0	0	-	-	0	0	JUNK	0	0	1	358.87	0	50726.8	0.50163	29.1809	0	0	FALSE	FALSE	-1	-1	0	0	0	0	0	0	BASPBJ0894_pilon (Unplaced)	LOWX|LOW|UNIQ|NON|PRI|NONE	-	-	LOWCOV	-	-	junk	1
BASENJISCAFF0688	2199	3	4.1728	95.1342	2092	9	0	0.3765	91.95	8.049	0	0	-	-	0	0	JUNK	0	0	2	1252.11	52	52942.9	0.38881	57.248	0	0	FALSE	FALSE	-1	-1	0	0	0	0	0	0	BASPBJ0895_pilon (Unplaced)	PURE|LOW|UNIQ|NON|ALT|NONE	-	-	HPURGE	-	-	quarantine	1
BASENJISCAFF0689	2356	14	13.43	100	2356	1	28	0.5068	25.47	74.53	0	0	BASENJISCAFF0585	BASENJISCAFF0473	95.67	1794.99	KEEP	0	0	3	514.931	19	133553	0.51486	57.7253	0	0	FALSE	FALSE	-1	-1	0	0	0	0	0	0	BASPBJ0896_pilon (Unplaced)	GOOD|HAP|REPT|NON|REP|NONE	WEAK|DIP|REPT|TOP|REP|NONE	GOOD|EXS|REPT|TOP|REP|NONE	HPURGE	PRIMARY	PRIMARY	quarantine	1
BASENJISCAFF0690	1873	22	20.095	100	1873	22	27	0.5501	0.267	98.93	0.801	0	BASENJICHR35.02	BASENJISCAFF0255	95.25	369.3	KEEP	0	0	5	125.792	2139	22336.5	0.57662	91.1749	0	0	FALSE	FALSE	-1	-1	0	0	0	0	0	0	BASPBJ0897_pilon (Unplaced)	PURE|HAP|REPT|NON|REP|NONE	GOOD|EXS|REPT|TOP|REP|NONE	GOOD|DIP|PART|SEC|ALT|NONE	HPURGE	PRIMARY	PRIMARY	quarantine	1
BASENJISCAFF0691	2361	29	26.4147	100	2361	15	38	0.5089	0.678	38.25	61.08	0	BASENJISCAFF0015	BASENJISCAFF0664	97.29	1495.72	REPEAT	0	0	68	1267.84	8150	178861	0.50995	78.03	0	0	FALSE	FALSE	-1	-1	0	0	0	0	0	0	BASPBJ0898_pilon (Unplaced) Diploidocus:PRIMARY|PRIMARY|PRIMARY|PRIMARY|PRIMARY|PRIMARY	GOOD|DIP|REPT|NON|REP|NONE	GOOD|EXS|REPT|TOP|REP|NONE	GOOD|HAP|REPT|TOP|REP|NONE	PRIMARY	PRIMARY	PRIMARY	keep	7
BASENJISCAFF0692	108958	91	100.799	100	108958	670	678	0.5086	0	0.001	15.4	84.6	-	-	0	0	JUNK	0	0	1809	2485.22	209388	275201	0.51324	98.8892	0	0	FALSE	FALSE	-1	-1	0	0	0	0	0	0	BASPBJ0899_pilon (Unplaced) Diploidocus:COLLAPSED|COLLAPSED|COLLAPSED|COLLAPSED|COLLAPSED|COLLAPSED	PURE|EXS|UNIQ|NON|REP|NONE	-	-	COLLAPSED	-	-	repeat	7
BASENJISCAFF0693	1615	67	67.5802	100	1615	111	7	0.5064	0	1.734	48.79	49.47	BASENJISCAFF0284	BASENJISCAFF1053	73.5	328.48	KEEP	1	0	689	890.973	307262	278568	0.50774	87.7911	0	0	FALSE	FALSE	-1	-1	0	0	0	0	0	0	BASPBJ0900_pilon (Unplaced) Diploidocus:PRIMARY|PRIMARY|PRIMARY|PRIMARY|PRIMARY|PRIMARY	WEAK|EXS|REPT|TOP|REP|NONE	GOOD|EXS|HOMO|TOP|REP|NONE	GOOD|EXS|REPT|TOP|REP|NONE	PRIMARY	PRIMARY	PRIMARY	keep	7
BASENJISCAFF0694	707	1	0.8741	87.4116	618	0	1	0.4389	100	0	0	0	-	-	0	0	JUNK	0	0	1	122.888	0	4132.91	0.43564	20.8517	0	0	FALSE	FALSE	-1	-1	0	0	0	0	0	0	BASPBJ0901_pilon (Unplaced)	LOWX|LOW|UNIQ|NON|PRI|NONE	-	-	LOWCOV	-	-	junk	1
BASENJISCAFF0695	7341	98	103.275	99.9455	7337	172	111	0.5501	0.2454	0	13.44	86.31	-	-	0	0	JUNK	0	0	4	92.9386	1649	16533	0.56654	95.8442	0	0	FALSE	FALSE	-1	-1	0	0	0	0	0	0	BASPBJ0904_pilon (Unplaced) Diploidocus:COLLAPSED|COLLAPSED|COLLAPSED|COLLAPSED|COLLAPSED|COLLAPSED	PURE|EXS|UNIQ|NON|REP|NONE	-	-	COLLAPSED	-	-	repeat	7
BASENJISCAFF0696	7672	22	54.0184	99.9479	7668	123	125	0.5462	6.974	45.37	16.62	31.03	BASENJICHR35.02	BASENJISCAFF0641	36.51	176.37	KEEP	0	1	1	68.778	0	11455.6	0.55005	48.2998	0	0	FALSE	FALSE	-1	-1	0	0	0	0	0	0	BASPBJ0905_pilon (Unplaced) Diploidocus:PRIMARY|KEEP|KEEP|KEEP|KEEP|KEEP	WEAK|HAP|PART|SEC|PRI|NONE	GOOD|EXS|REPT|TOP|REP|NONE	GOOD|DIP|HOMO|SEC|REP|NONE	KEEP	PRIMARY	PRIMARY	keep	7
BASENJISCAFF0697	1732	29	28.2136	100	1732	24	26	0.5526	0.231	25.35	74.42	0	BASENJICHR1.02	BASENJISCAFF0686	67.61	144.23	KEEP	0	0	213	198.147	27629	35454.5	0.57852	97.4795	0	0	FALSE	FALSE	-1	-1	0	0	0	0	0	0	BASPBJ0906_pilon (Unplaced) Diploidocus:PRIMARY|PRIMARY|PRIMARY|PRIMARY|PRIMARY|PRIMARY	GOOD|DIP|HOMO|NON|REP|NONE	WEAK|DIP|REPT|TOP|REP|NONE	GOOD|DIP|HOMO|SEC|REP|NONE	PRIMARY	PRIMARY	PRIMARY	keep	7
BASENJISCAFF0698	2783	72	74.9529	100	2783	56	61	0.5442	0	0	36.65	63.35	BASENJICHR29.01	BASENJICHR35.02	95.44	179.45	HAPLOTIG	0	0	5	147.001	2321	24950.8	0.55911	98.7305	0	0	FALSE	FALSE	-1	-1	0	0	0	0	0	0	BASPBJ0908_pilon (Unplaced) Diploidocus:PRIMARY|PRIMARY|PRIMARY|PRIMARY|PRIMARY|PRIMARY	GOOD|EXS|HOMO|NON|REP|NONE	PURE|DIP|UNIQ|TOP|PRI|COMP	GOOD|EXS|REPT|TOP|REP|NONE	PRIMARY	PRIMARY	PRIMARY	keep	7
BASENJISCAFF0699	801	20	19.3358	100	801	30	1	0.3824	1.623	82.4	15.98	0	BASENJICHR8.11	BASENJISCAFF0582	48.19	71.29	KEEP	1	0	3540	3853.57	153898	147690	0.3995	88.9032	0	0	FALSE	FALSE	-1	-1	0	0	0	0	0	0	BASPBJ0909_pilon (Unplaced)	PURE|HAP|PART|TOP|REP|NONE	GOOD|EXS|REPT|TOP|PRI|NONE	PURE|HAP|HOMO|SEC|REP|NONE	HPURGE	PRIMARY	HPURGE	quarantine	1
BASENJISCAFF0700	12679	49	44.5026	99.7713	12650	158	66	0.5469	8.502	13.98	62.88	14.63	BASENJICHR35.02	BASENJICHR1.02	66.68	584.21	KEEP	1	1	1	30.4489	0	5666.58	0.55154	36.6237	0	0	FALSE	FALSE	-1	-1	0	0	0	0	0	0	BASPBJ0910_pilon (Unplaced) Diploidocus:PRIMARY|PRIMARY|PRIMARY|PRIMARY|PRIMARY|PRIMARY	GOOD|DIP|REPT|TOP|PRI|NONE	GOOD|EXS|REPT|TOP|REP|NONE	WEAK|DIP|REPT|TOP|REP|NONE	PRIMARY	PRIMARY	PRIMARY	keep	7
BASENJISCAFF0701	366	3	2.6011	96.4481	353	0	4	0.5242	100	0	0	0	-	-	0	0	JUNK	0	0	1	13.0471	0	2225.84	0.55191	31.7647	0	0	FALSE	FALSE	-1	-1	0	0	0	0	0	0	BASPBJ0911_pilon (Unplaced)	PURE|LOW|UNIQ|NON|PRI|NONE	-	-	LOWQUAL	-	-	quarantine	1
BASENJISCAFF0702	513	2	2.2885	100	513	3	0	0.5358	100	0	0	0	-	-	0	0	JUNK	0	0	1	16.5339	0	2225.13	0.53411	24.0246	0	0	FALSE	FALSE	-1	-1	0	0	0	0	0	0	BASPBJ0912_pilon (Unplaced)	LOWX|LOW|UNIQ|NON|PRI|NONE	-	-	LOWCOV	-	-	junk	1
BASENJISCAFF0703	467	1	1	100	467	1	0	0.3862	100	0	0	0	-	-	0	0	JUNK	0	0	1	872.465	0	26061.5	0.38116	25.1701	0	0	FALSE	FALSE	-1	-1	0	0	0	0	0	0	BASPBJ0913_pilon (Unplaced)	LOWX|LOW|UNIQ|NON|PRI|NONE	-	-	LOWCOV	-	-	junk	1
BASENJISCAFF0704	5731	70	63.6974	100	5731	84	117	0.5471	0	23.78	25.72	50.5	BASENJICHR35.02	BASENJISCAFF0552	87.26	296.61	KEEP	1	0	4	115.508	1212	19116.7	0.56814	99.2638	0	0	FALSE	FALSE	-1	-1	0	0	0	0	0	0	BASPBJ0914_pilon (Unplaced) Diploidocus:PRIMARY|PRIMARY|PRIMARY|PRIMARY|PRIMARY|PRIMARY	GOOD|EXS|REPT|TOP|REP|NONE	GOOD|EXS|REPT|TOP|REP|NONE	GOOD|EXS|HOMO|SEC|REP|NONE	PRIMARY	PRIMARY	PRIMARY	keep	7
BASENJISCAFF0705	15310	33	32.7297	100	15310	28	126	0.5078	0.078	23.08	76.84	0	BASENJISCAFF0284	BASENJISCAFF1053	95.83	3349.77	KEEP	2	0	736	1098.66	339272	337469	0.51326	91.5925	0	0	FALSE	FALSE	-1	-1	0	0	0	0	0	0	BASPBJ0915_pilon (Unplaced) Diploidocus:PRIMARY|PRIMARY|PRIMARY|PRIMARY|PRIMARY|PRIMARY	GOOD|DIP|REPT|TOP|REP|NONE	GOOD|EXS|HOMO|TOP|REP|NONE	GOOD|EXS|REPT|TOP|REP|NONE	PRIMARY	PRIMARY	PRIMARY	keep	7
BASENJISCAFF0706	775	7	7.631	100	775	0	10	0.5025	51.35	48.65	0	0	BASENJISCAFF0365	BASENJISCAFF0940	85.29	161.94	KEEP	0	0	23	842.88	810	203785	0.51613	70.494	0	0	FALSE	FALSE	-1	-1	0	0	0	0	0	0	BASPBJ0917_pilon (Unplaced)	GOOD|LOW|HOMO|NON|REP|NONE	GOOD|DIP|HOMO|TOP|REP|NONE	GOOD|DIP|HOMO|TOP|REP|NONE	HPURGE	PRIMARY	PRIMARY	quarantine	1
BASENJISCAFF0707	1939	39	36.3925	100	1939	8	59	0.506	0	14.18	85.82	0	-	-	0	0	KEEP	2	1	418	929.708	218185	255581	0.51367	88.0293	0	0	FALSE	FALSE	-1	-1	0	0	0	0	0	0	BASPBJ0918_pilon (Unplaced) Diploidocus:PRIMARY|PRIMARY|PRIMARY|PRIMARY|PRIMARY|PRIMARY	PURE|DIP|UNIQ|TOP|REP|NONE	-	-	PRIMARY	-	-	keep	7
BASENJISCAFF0708	1838	2	1.7584	100	1838	1	2	0.3797	100	0	0	0	-	-	0	0	JUNK	0	0	1	6.9415	0	181.226	0.39554	22.1854	0	0	FALSE	FALSE	-1	-1	0	0	0	0	0	0	BASPBJ0920_pilon (Unplaced)	LOWX|LOW|UNIQ|NON|PRI|NONE	-	-	LOWCOV	-	-	junk	1
BASENJISCAFF0709	6854	21	19.9437	100	6854	17	21	0.5086	4.494	83.11	12.4	0	BASENJISCAFF0252	BASENJISCAFF0664	99.2	540.5	REPEAT	0	0	1890	2011.94	199578	243774	0.51342	96.1921	0	0	FALSE	FALSE	-1	-1	0	0	0	0	0	0	BASPBJ0921_pilon (Unplaced)	PURE|HAP|REPT|NON|REP|NONE	GOOD|EXS|REPT|TOP|REP|NONE	GOOD|HAP|REPT|TOP|REP|NONE	HPURGE	PRIMARY	PRIMARY	quarantine	1
BASENJISCAFF0710	6538	39	34.4238	100	6538	9	91	0.5083	0.031	41.17	58.8	0	BASENJISCAFF1023	BASENJISCAFF0284	99.91	10205	KEEP	2	0	722	1051.74	313547	309062	0.5179	94.226	0	0	FALSE	FALSE	-1	-1	0	0	0	0	0	0	BASPBJ0923_pilon (Unplaced) Diploidocus:PRIMARY|PRIMARY|PRIMARY|PRIMARY|PRIMARY|PRIMARY	GOOD|DIP|REPT|TOP|REP|NONE	WEAK|HAP|REPT|TOP|REP|NONE	GOOD|EXS|HOMO|TOP|REP|NONE	PRIMARY	PRIMARY	PRIMARY	keep	7
BASENJISCAFF0711	8750	28	24.9223	100	8750	31	22	0.5129	2.914	37.35	59.74	0	BASENJICHR11.02	BASENJISCAFF0252	99.6	871.03	REPEAT	0	0	1841	2094.48	215893	283553	0.51474	99.381	0	0	FALSE	FALSE	-1	-1	0	0	0	0	0	0	BASPBJ0924_pilon (Unplaced) Diploidocus:PRIMARY|PRIMARY|PRIMARY|PRIMARY|PRIMARY|PRIMARY	GOOD|DIP|REPT|NON|REP|NONE	GOOD|DIP|REPT|TOP|REP|NONE	GOOD|EXS|REPT|SEC|REP|NONE	PRIMARY	PRIMARY	PRIMARY	keep	7
BASENJISCAFF0712	7740	8	16.9169	100	7740	60	81	0.5004	49.26	20.8	29.94	0	BASENJICHR19.01	BASENJICHR11.01	64.69	396.37	KEEP	0	0	1	2372.91	0	63280.1	0.47145	47.1221	0	0	FALSE	FALSE	-1	-1	0	0	0	0	0	0	BASPBJ0925_pilon (Unplaced) Diploidocus:PRIMARY|PRIMARY|PRIMARY|PRIMARY|PRIMARY|PRIMARY	WEAK|LOW|REPT|NON|PRI|NONE	PURE|DIP|UNIQ|TOP|PRI|COMP	PURE|DIP|UNIQ|TOP|PRI|COMP	PRIMARY	PRIMARY	PRIMARY	keep	7
BASENJISCAFF0713	3948	0	0	0	0	0	0	0	100	0	0	0	-	-	0	0	KEEP	0	0	1	505.124	0	14969.8	0.36322	23.024	0	0	FALSE	FALSE	-1	-1	0	0	0	0	0	0	BASPBJ0926_pilon (Unplaced)	LOWX|LOW|UNIQ|NON|PRI|NONE	-	-	LOWCOV	-	-	junk	1
BASENJISCAFF0714	1011	35	35.541	100	1011	0	53	0.5112	0.297	9.496	90.21	0	-	-	0	0	KEEP	0	0	662	920.36	303805	263869	0.51929	83.8579	0	0	FALSE	FALSE	-1	-1	0	0	0	0	0	0	BASPBJ0927_pilon (Unplaced) Diploidocus:PRIMARY|PRIMARY|PRIMARY|PRIMARY|PRIMARY|PRIMARY	PURE|DIP|UNIQ|NON|REP|NONE	-	-	PRIMARY	-	-	keep	7
BASENJISCAFF0715	47260	44	44.7691	100	47260	130	135	0.5067	0	5.091	94.3	0.612	-	-	0	0	KEEP	1	0	1825	1992.85	209388	272071	0.51096	99.8518	0	0	FALSE	FALSE	-1	-1	0	0	0	0	0	0	BASPBJ0928_pilon (Unplaced) Diploidocus:PRIMARY|PRIMARY|PRIMARY|PRIMARY|PRIMARY|PRIMARY	PURE|DIP|UNIQ|TOP|REP|NONE	-	-	PRIMARY	-	-	keep	7
BASENJISCAFF0716	583	5	5.813	100	583	0	8	0.5001	80.45	19.55	0	0	-	-	0	0	JUNK	0	0	1	289.303	0	68811.9	0.50257	34.1113	0	0	FALSE	FALSE	-1	-1	0	0	0	0	0	0	BASPBJ0929_pilon (Unplaced)	PURE|LOW|UNIQ|NON|PRI|NONE	-	-	HPURGE	-	-	quarantine	1
BASENJISCAFF0717	983	2	1.7803	96.6429	950	2	0	0.5445	100	0	0	0	-	-	0	0	JUNK	0	0	1	84.8276	0	2227.07	0.56358	24.3469	0	0	FALSE	FALSE	-1	-1	0	0	0	0	0	0	BASPBJ0930_pilon (Unplaced)	LOWX|LOW|UNIQ|NON|PRI|NONE	-	-	LOWCOV	-	-	junk	1
BASENJISCAFF0718	1224	24	24.4967	100	1224	20	19	0.549	0	59.72	40.28	0	BASENJICHR35.02	BASENJISCAFF0759	95.1	282.68	REPEAT	0	0	8	142.98	2586	23557.5	0.56209	97.9967	0	0	FALSE	FALSE	-1	-1	0	0	0	0	0	0	BASPBJ0931_pilon (Unplaced) Diploidocus:PRIMARY|PRIMARY|PRIMARY|PRIMARY|PRIMARY|PRIMARY	GOOD|HAP|REPT|NON|REP|NONE	GOOD|EXS|REPT|TOP|REP|NONE	WEAK|DIP|PART|SEC|REP|NONE	PRIMARY	PRIMARY	PRIMARY	keep	7
BASENJISCAFF0719	1416	46	44.7669	99.2232	1405	46	25	0.5456	2.048	0.5646	97.39	0	-	-	0	0	KEEP	0	0	6	94.1561	2884	18531.5	0.56215	90.9352	0	0	FALSE	FALSE	-1	-1	0	0	0	0	0	0	BASPBJ0932_pilon (Unplaced) Diploidocus:PRIMARY|PRIMARY|PRIMARY|PRIMARY|PRIMARY|PRIMARY	PURE|DIP|UNIQ|NON|REP|NONE	-	-	PRIMARY	-	-	keep	7
BASENJISCAFF0720	1305	30	28.1149	100	1305	2	40	0.5067	0	37.09	62.91	0	BASENJISCAFF0473	BASENJISCAFF1053	52.95	441.46	KEEP	0	1	429	867.056	225836	253760	0.51724	91.8687	0	0	FALSE	FALSE	-1	-1	0	0	0	0	0	0	BASPBJ0933_pilon (Unplaced) Diploidocus:PRIMARY|PRIMARY|PRIMARY|PRIMARY|PRIMARY|PRIMARY	GOOD|DIP|REPT|SEC|REP|NONE	GOOD|EXS|REPT|TOP|REP|NONE	GOOD|EXS|REPT|TOP|REP|NONE	PRIMARY	PRIMARY	PRIMARY	keep	7
BASENJISCAFF0721	3767	18	15.8949	100	3767	14	20	0.5129	5.256	94.74	0	0	BASENJISCAFF0251	BASENJISCAFF0299	99.2	1138.12	REPEAT	0	0	1753	1732.05	176675	218056	0.51659	91.3927	0	0	FALSE	FALSE	-1	-1	0	0	0	0	0	0	BASPBJ0935_pilon (Unplaced)	PURE|HAP|REPT|NON|REP|NONE	PURE|DIP|UNIQ|TOP|REP|NONE	GOOD|EXS|REPT|TOP|REP|NONE	HPURGE	PRIMARY	COLLAPSED	quarantine	1
BASENJISCAFF0722	5551	73	52.131	98.5408	5470	102	110	0.5506	41.99	0.01774	0.7203	57.27	-	-	0	0	JUNK	0	0	1	52.2121	64	9112.1	0.5563	51.7647	0	0	FALSE	FALSE	-1	-1	0	0	0	0	0	0	BASPBJ0936_pilon (Unplaced) Diploidocus:COLLAPSED|COLLAPSED|COLLAPSED|COLLAPSED|COLLAPSED|COLLAPSED	GOOD|EXS|UNIQ|NON|PRI|NONE	-	-	COLLAPSED	-	-	repeat	7
BASENJISCAFF0723	7832	313	290.479	99.9362	7827	363	346	0.5522	4.737	0.02598	2.758	92.48	-	-	0	0	JUNK	0	0	289	278.714	49663	47879.1	0.58491	93.8893	0	0	FALSE	FALSE	-1	-1	0	0	0	0	0	0	BASPBJ0938_pilon (Unplaced) Diploidocus:COLLAPSED|COLLAPSED|COLLAPSED|COLLAPSED|COLLAPSED|COLLAPSED	PURE|EXS|UNIQ|NON|REP|NONE	-	-	COLLAPSED	-	-	repeat	7
BASENJISCAFF0724	9591	738	710.046	99.6976	9562	542	493	0.5018	0.3333	0.00997	0	99.66	-	-	0	0	JUNK	0	0	671	886.789	310138	291084	0.50308	99.0695	0	0	FALSE	FALSE	-1	-1	0	0	0	0	0	0	BASPBJ0939_pilon (Unplaced) Diploidocus:COLLAPSED|COLLAPSED|COLLAPSED|COLLAPSED|COLLAPSED|COLLAPSED	PURE|EXS|UNIQ|NON|REP|NONE	-	-	COLLAPSED	-	-	repeat	7
BASENJISCAFF0725	16203	1052	1043.21	99.9877	16201	1130	1066	0.4966	0.01834	0	0	99.98	-	-	0	0	JUNK	0	0	23	498.185	12570	108740	0.5033	99.7465	0	0	FALSE	FALSE	-1	-1	0	0	0	0	0	0	BASPBJ0941_pilon (Unplaced) Diploidocus:COLLAPSED|COLLAPSED|COLLAPSED|COLLAPSED|COLLAPSED|COLLAPSED	PURE|EXS|UNIQ|NON|REP|NONE	-	-	COLLAPSED	-	-	repeat	7
BASENJISCAFF0726	1316	3	2.7523	100	1316	0	5	0.5017	100	0	0	0	-	-	0	0	JUNK	0	0	1	345.754	0	45843.2	0.5	36.5891	0	0	FALSE	FALSE	-1	-1	0	0	0	0	0	0	BASPBJ0942_pilon (Unplaced)	PURE|LOW|UNIQ|NON|PRI|NONE	-	-	HPURGE	-	-	quarantine	1
BASENJISCAFF0727	5155	39	45.1948	100	5155	79	50	0.5454	0	0.989	92.63	6.382	-	-	0	0	KEEP	0	1	4	104.226	1847	20070.9	0.56275	97.2314	0	0	FALSE	FALSE	-1	-1	0	0	0	0	0	0	BASPBJ0943_pilon (Unplaced) Diploidocus:PRIMARY|PRIMARY|PRIMARY|PRIMARY|PRIMARY|PRIMARY	PURE|DIP|UNIQ|SEC|REP|NONE	-	-	PRIMARY	-	-	keep	7
BASENJISCAFF0728	2182	29	26.8804	100	2182	2	51	0.505	1.742	35.98	62.28	0	BASENJISCAFF0269	BASENJISCAFF0644	96.29	647.3	REPEAT	0	0	101	1293.57	10274	178009	0.511	73.9796	0	0	FALSE	FALSE	-1	-1	0	0	0	0	0	0	BASPBJ0944_pilon (Unplaced) Diploidocus:PRIMARY|PRIMARY|PRIMARY|PRIMARY|PRIMARY|PRIMARY	GOOD|DIP|REPT|NON|REP|NONE	WEAK|EXS|REPT|TOP|REP|NONE	PURE|DIP|UNIQ|SEC|PRI|NONE	PRIMARY	PRIMARY	PRIMARY	keep	7
BASENJISCAFF0729	1096	1	1	100	1096	1	0	0.5661	100	0	0	0	-	-	0	0	JUNK	0	0	1	1.07477	0	6.10841	0.58029	8.13084	0	0	FALSE	FALSE	-1	-1	0	0	0	0	0	0	BASPBJ0945_pilon (Unplaced)	LOWX|LOW|UNIQ|NON|PRI|NONE	-	-	LOWCOV	-	-	junk	1
BASENJISCAFF0730	2273	13	13.0554	100	2273	6	8	0.4224	0.088	99.91	0	0	BASENJICHRX.01X	BASENJICHR26.01	64.76	68.46	KEEP	0	0	29	2445.2	1140	83138.3	0.41839	94.4815	0	0	FALSE	FALSE	-1	-1	0	0	0	0	0	0	BASPBJ0946_pilon (Unplaced)	PURE|HAP|HOMO|NON|REP|NONE	PURE|DIP|UNIQ|TOP|PRI|NONE|+TEL|+VEC	PURE|DIP|UNIQ|TOP|PRI|COMP	HPURGE	PRIMARY	PRIMARY	quarantine	1
BASENJISCAFF0731	6663	1	1.054	100	6663	1	1	0.3204	100	0	0	0	-	-	0	0	JUNK	0	0	1	3.16679	0	81.0991	0.33633	17.0258	0	0	FALSE	FALSE	-1	-1	0	0	0	0	0	0	BASPBJ0947_pilon (Unplaced)	LOWX|LOW|UNIQ|NON|PRI|NONE	-	-	LOWCOV	-	-	junk	1
BASENJISCAFF0732	792	4	3.5215	100	792	5	0	0.5047	100	0	0	0	-	-	0	0	JUNK	0	0	4	923.198	6	110818	0.52273	54.3081	0	0	FALSE	FALSE	-1	-1	0	0	0	0	0	0	BASPBJ0948_pilon (Unplaced)	PURE|LOW|UNIQ|NON|REP|NONE	-	-	HPURGE	-	-	quarantine	1
BASENJISCAFF0733	1426	8	7.2125	100	1426	6	3	0.5162	33.94	66.06	0	0	BASENJISCAFF0135	BASENJISCAFF0237	95.09	261.71	REPEAT	0	0	1778	1871.06	193644	241130	0.52384	85.2857	0	0	FALSE	FALSE	-1	-1	0	0	0	0	0	0	BASPBJ0949_pilon (Unplaced)	GOOD|HAP|REPT|NON|REP|NONE	WEAK|LOW|REPT|TOP|REP|NONE	GOOD|DIP|REPT|SEC|REP|NONE	HPURGE	KEEP	PRIMARY	quarantine	1
BASENJISCAFF0734	706	7	6.1558	100	706	7	0	0.5036	100	0	0	0	-	-	0	0	JUNK	0	0	1	274.288	0	74811.8	0.517	41.6176	0	0	FALSE	FALSE	-1	-1	0	0	0	0	0	0	BASPBJ0951_pilon (Unplaced)	PURE|LOW|UNIQ|NON|PRI|NONE	-	-	HPURGE	-	-	quarantine	1
BASENJISCAFF0735	9153	62	58.174	100	9153	176	9	0.5073	0.175	23.56	28.77	47.5	BASENJISCAFF0664	BASENJISCAFF0299	98.95	1766.55	REPEAT	0	0	11	1128.9	760	157275	0.51775	64.479	0	0	FALSE	FALSE	-1	-1	0	0	0	0	0	0	BASPBJ0952_pilon (Unplaced) Diploidocus:PRIMARY|PRIMARY|PRIMARY|PRIMARY|PRIMARY|PRIMARY	WEAK|EXS|REPT|NON|REP|NONE	GOOD|HAP|REPT|TOP|REP|NONE	GOOD|EXS|REPT|TOP|REP|NONE	PRIMARY	PRIMARY	PRIMARY	keep	7
BASENJISCAFF0736	522	10	10.2165	100	522	13	0	0.5139	6.13	93.87	0	0	BASENJISCAFF0877	BASENJISCAFF0714	71.46	120.31	KEEP	0	0	716	711.393	222910	211214	0.52299	81.4516	0	0	FALSE	FALSE	-1	-1	0	0	0	0	0	0	BASPBJ0953_pilon (Unplaced)	PURE|HAP|HOMO|NON|REP|NONE	GOOD|HAP|HOMO|TOP|REP|NONE	PURE|DIP|UNIQ|SEC|REP|NONE	HPURGE	PRIMARY	PRIMARY	quarantine	1
BASENJISCAFF0737	1178	27	26.0051	100	1178	20	22	0.5485	6.367	34.13	59.51	0	BASENJICHR1.02	BASENJISCAFF0819	55.43	115.2	KEEP	0	1	1	50.7448	420	8538.67	0.57046	72.1354	0	0	FALSE	FALSE	-1	-1	0	0	0	0	0	0	BASPBJ0954_pilon (Unplaced) Diploidocus:PRIMARY|PRIMARY|PRIMARY|PRIMARY|PRIMARY|PRIMARY	GOOD|DIP|HOMO|SEC|PRI|NONE	WEAK|DIP|REPT|TOP|REP|NONE	WEAK|DIP|HOMO|SEC|PRI|NONE	PRIMARY	PRIMARY	PRIMARY	keep	7
BASENJISCAFF0738	9109	4	5.4002	99.9012	9100	16	3	0.5119	63.76	36.24	0	0	BASENJISCAFF0748	BASENJISCAFF0418	86.1	1411.09	KEEP	0	0	868	1250.71	344472	342903	0.51268	91.0382	0	0	FALSE	FALSE	-1	-1	0	0	0	0	0	0	BASPBJ0956_pilon (Unplaced)	GOOD|LOW|REPT|NON|REP|NONE	WEAK|LOW|REPT|TOP|REP|NONE	GOOD|EXS|REPT|TOP|REP|NONE	HPURGE	PRIMARY	PRIMARY	quarantine	1
BASENJISCAFF0739	300	1	1	100	300	0	1	0.4367	100	0	0	0	-	-	0	0	JUNK	0	0	1	638.704	0	23507.9	0.44333	21.8978	0	0	FALSE	FALSE	-1	-1	0	0	0	0	0	0	BASPBJ0959_pilon (Unplaced)	LOWX|LOW|UNIQ|NON|PRI|NONE	-	-	LOWCOV	-	-	junk	1
BASENJISCAFF0740	171	2	1.9064	100	171	0	2	0.4006	100	0	0	0	-	-	0	0	JUNK	0	0	1	3.46207	0	505.379	0.40351	22.7586	0	0	FALSE	FALSE	-1	-1	0	0	0	0	0	0	BASPBJ0960_pilon (Unplaced)	LOWX|LOW|UNIQ|NON|PRI|NONE	-	-	LOWCOV	-	-	junk	1
BASENJISCAFF0741	3168	10	8.4716	100	3168	4	8	0.5085	34.85	65.15	0	0	BASENJISCAFF0015	BASENJISCAFF0471	93.02	1386.36	KEEP	0	1	2188	2275.63	228968	299666	0.51862	96.3717	0	0	FALSE	FALSE	-1	-1	0	0	0	0	0	0	BASPBJ0961_pilon (Unplaced)	GOOD|HAP|REPT|SEC|REP|NONE	GOOD|EXS|REPT|TOP|REP|NONE	GOOD|HAP|REPT|TOP|REP|NONE	HPURGE	PRIMARY	PRIMARY	quarantine	1
BASENJISCAFF0742	22615	44	53.5997	100	22615	194	73	0.5029	0	2.224	76.9	20.88	BASENJICHRX.03	BASENJICHR8.03	99.06	1553.3	REPEAT	0	0	908	1471.91	272174	297862	0.50931	98.7693	0	0	FALSE	FALSE	-1	-1	0	0	0	0	0	0	BASPBJ0962_pilon (Unplaced) Diploidocus:PRIMARY|PRIMARY|PRIMARY|PRIMARY|PRIMARY|PRIMARY	GOOD|DIP|REPT|NON|REP|NONE	GOOD|EXS|HOMO|TOP|REP|NONE	GOOD|DIP|REPT|TOP|REP|NONE	PRIMARY	PRIMARY	PRIMARY	keep	7
BASENJISCAFF0743	2175	2	1.8791	100	2175	1	2	0.518	100	0	0	0	-	-	0	0	JUNK	0	0	6	904.957	135	109726	0.51862	62.3081	0	0	FALSE	FALSE	-1	-1	0	0	0	0	0	0	BASPBJ0963_pilon (Unplaced)	LOWX|LOW|UNIQ|NON|REP|NONE	-	-	LOWCOV	-	-	junk	1
BASENJISCAFF0744	2793	26	26.4164	100	2793	48	4	0.5046	4.404	44.11	51.49	0	BASENJISCAFF0284	BASENJISCAFF1053	88.83	330.65	KEEP	0	1	705	1053.84	324337	326720	0.50734	90.3506	0	0	FALSE	FALSE	-1	-1	0	0	0	0	0	0	BASPBJ0964_pilon (Unplaced) Diploidocus:PRIMARY|PRIMARY|PRIMARY|PRIMARY|PRIMARY|PRIMARY	GOOD|DIP|REPT|SEC|REP|NONE	GOOD|EXS|HOMO|TOP|REP|NONE	GOOD|EXS|REPT|TOP|REP|NONE	PRIMARY	PRIMARY	PRIMARY	keep	7
BASENJISCAFF0745	819	1	2.1844	100	819	5	4	0.3243	93.04	6.96	0	0	-	-	0	0	JUNK	0	0	1	4.27112	0	2819.3	0.3663	35.9395	0	0	FALSE	FALSE	-1	-1	0	0	0	0	0	0	BASPBJ0965_pilon (Unplaced)	LOWX|LOW|UNIQ|NON|PRI|NONE	-	-	LOWCOV	-	-	junk	1
BASENJISCAFF0746	1712	5	5.4761	100	1712	1	7	0.5089	92.64	7.36	0	0	-	-	0	0	JUNK	0	0	54	1431.3	14687	179929	0.52161	76.6311	0	0	FALSE	FALSE	-1	-1	0	0	0	0	0	0	BASPBJ0966_pilon (Unplaced)	PURE|LOW|UNIQ|NON|REP|NONE	-	-	HPURGE	-	-	quarantine	1
BASENJISCAFF0747	4710	9	10.3142	100	4710	0	29	0.3962	26.73	73.27	0	0	BASENJICHRX.01X	BASENJICHR9.01	97.69	654.44	REPEAT	0	0	2112	2261.82	85815	95529.8	0.42633	93.0401	0	0	FALSE	FALSE	-1	-1	0	0	0	0	0	0	BASPBJ0967_pilon (Unplaced)	GOOD|HAP|REPT|NON|REP|NONE	PURE|DIP|UNIQ|TOP|PRI|NONE|+TEL|+VEC	PURE|DIP|UNIQ|TOP|PRI|COMP	HPURGE	PRIMARY	PRIMARY	quarantine	1
BASENJISCAFF0748	59753	17	39.0565	99.426	59410	271	132	0.5067	30.21	31.97	19.41	18.4	BASENJISCAFF0284	BASENJISCAFF0572	99.64	1785.54	REPEAT	0	0	782	1202.62	349895	358866	0.51253	98.1784	0	0	FALSE	FALSE	-1	-1	0	0	0	0	0	0	BASPBJ0968_pilon (Unplaced) Diploidocus:PRIMARY|PRIMARY|REPEAT|REPEAT|REPEAT|REPEAT	WEAK|HAP|REPT|NON|REP|NONE	GOOD|EXS|HOMO|TOP|REP|NONE	GOOD|DIP|REPT|TOP|REP|NONE	REPEAT	PRIMARY	PRIMARY	repeat	7
BASENJISCAFF0749	1366	90	86.4085	100	1366	9	124	0.5074	0.073	0.073	27.09	72.77	BASENJISCAFF0122	BASENJISCAFF0487	72.55	191.65	KEEP	0	0	479	861.61	275834	257091	0.51098	80.7463	0	0	FALSE	FALSE	-1	-1	0	0	0	0	0	0	BASPBJ0969_pilon (Unplaced) Diploidocus:COLLAPSED|PRIMARY|PRIMARY|PRIMARY|PRIMARY|PRIMARY	GOOD|EXS|HOMO|NON|REP|NONE	PURE|DIP|UNIQ|TOP|REP|NONE	PURE|DIP|UNIQ|TOP|REP|NONE	PRIMARY	PRIMARY	PRIMARY	keep	7
BASENJISCAFF0750	1855	58	57.7854	100	1855	90	16	0.5058	0	1.24	59.68	39.08	BASENJISCAFF0284	BASENJISCAFF0589	65.44	111.81	KEEP	0	1	253	716.166	167691	218369	0.5159	76.7086	0	0	FALSE	FALSE	-1	-1	0	0	0	0	0	0	BASPBJ0970_pilon (Unplaced) Diploidocus:PRIMARY|PRIMARY|PRIMARY|PRIMARY|PRIMARY|PRIMARY	GOOD|DIP|HOMO|SEC|REP|NONE	GOOD|EXS|HOMO|TOP|REP|NONE	GOOD|EXS|REPT|TOP|REP|NONE	PRIMARY	PRIMARY	PRIMARY	keep	7
BASENJISCAFF0751	1894	11	11.3596	100	1894	0	19	0.5097	2.534	97.47	0	0	BASENJISCAFF0269	BASENJISCAFF0070	86.22	550.16	KEEP	0	0	8	971.269	324	127064	0.51056	64.6146	0	0	FALSE	FALSE	-1	-1	0	0	0	0	0	0	BASPBJ0971_pilon (Unplaced)	PURE|HAP|REPT|NON|REP|NONE	WEAK|EXS|REPT|TOP|REP|NONE	GOOD|DIP|REPT|TOP|REP|NONE	HPURGE	PRIMARY	PRIMARY	quarantine	1
BASENJISCAFF0752	753	4	3.6042	100	753	0	4	0.3977	100	0	0	0	-	-	0	0	JUNK	0	0	1	485.092	0	13974.5	0.4077	24.0715	0	0	FALSE	FALSE	-1	-1	0	0	0	0	0	0	BASPBJ0972_pilon (Unplaced)	PURE|LOW|UNIQ|NON|PRI|NONE	-	-	HPURGE	-	-	quarantine	1
BASENJISCAFF0753	3007	52	51.0801	100	3007	51	44	0.5073	0	28	42.53	29.46	BASENJISCAFF0284	BASENJISCAFF1053	81.01	285.27	KEEP	0	0	650	947.226	302579	289507	0.5138	86.414	0	0	FALSE	FALSE	-1	-1	0	0	0	0	0	0	BASPBJ0974_pilon (Unplaced) Diploidocus:PRIMARY|PRIMARY|PRIMARY|PRIMARY|PRIMARY|PRIMARY	WEAK|DIP|REPT|NON|REP|NONE	GOOD|EXS|HOMO|TOP|REP|NONE	GOOD|EXS|REPT|TOP|REP|NONE	PRIMARY	PRIMARY	PRIMARY	keep	7
BASENJISCAFF0754	2982	119	107.423	100	2982	107	91	0.5462	0	16.9	0.537	82.56	-	-	0	0	JUNK	0	0	4	79.9587	2033	16847.1	0.55969	83.3221	0	0	FALSE	FALSE	-1	-1	0	0	0	0	0	0	BASPBJ0975_pilon (Unplaced) Diploidocus:COLLAPSED|COLLAPSED|COLLAPSED|COLLAPSED|COLLAPSED|COLLAPSED	PURE|EXS|UNIQ|NON|REP|NONE	-	-	COLLAPSED	-	-	repeat	7
BASENJISCAFF0755	4469	39	79.4303	99.3287	4439	126	100	0.5504	22.11	27.61	4.632	45.65	BASENJICHR35.02	BASENJISCAFF0497	41.73	149.21	KEEP	0	0	5	110.684	2200	18247.1	0.56657	72.4961	0	0	FALSE	FALSE	-1	-1	0	0	0	0	0	0	BASPBJ0976_pilon (Unplaced) Diploidocus:KEEP|KEEP|KEEP|KEEP|KEEP|KEEP	WEAK|EXS|PART|NON|REP|NONE	GOOD|EXS|REPT|TOP|REP|NONE	PURE|DIP|UNIQ|SEC|REP|NONE	KEEP	PRIMARY	PRIMARY	keep	7
BASENJISCAFF0756	1218	12	11.4745	100	1218	2	15	0.5077	14.86	85.14	0	0	BASENJISCAFF0634	BASENJISCAFF0750	88.83	194.66	KEEP	0	1	283	813.789	93920	208298	0.50821	72.5671	0	0	FALSE	FALSE	-1	-1	0	0	0	0	0	0	BASPBJ0977_pilon (Unplaced)	PURE|HAP|HOMO|SEC|REP|NONE	PURE|DIP|UNIQ|TOP|REP|NONE	GOOD|DIP|HOMO|SEC|REP|NONE	HPURGE	PRIMARY	PRIMARY	quarantine	1
BASENJISCAFF0757	509	55	51.1749	100	509	1	66	0.3898	0	9.823	90.18	0	-	-	0	0	KEEP	0	0	11	2715.04	158	95047.7	0.42043	65.6315	0	0	FALSE	FALSE	-1	-1	0	0	0	0	0	0	BASPBJ0978_pilon (Unplaced) Diploidocus:PRIMARY|PRIMARY|PRIMARY|PRIMARY|PRIMARY|PRIMARY	PURE|DIP|UNIQ|NON|REP|NONE	-	-	PRIMARY	-	-	keep	7
BASENJISCAFF0758	865	15	15.489	100	865	3	19	0.5058	2.428	97.57	0	0	BASENJISCAFF0327	BASENJISCAFF0400	81.85	109.25	KEEP	0	1	4	572.653	166	139243	0.52717	63.7664	0	0	FALSE	FALSE	-1	-1	0	0	0	0	0	0	BASPBJ0979_pilon (Unplaced)	PURE|HAP|HOMO|SEC|REP|NONE	PURE|HAP|PART|TOP|REP|NONE	WEAK|EXS|HOMO|TOP|REP|NONE	HPURGE	HPURGE	PRIMARY	quarantine	1
BASENJISCAFF0759	3555	21	19.6875	99.9437	3553	19	33	0.549	27.43	30.97	41.6	0	BASENJICHR35.02	BASENJISCAFF0530	48.69	187.82	KEEP	0	1	3	119.22	535	19220.3	0.57722	64.4092	0	0	FALSE	FALSE	-1	-1	0	0	0	0	0	0	BASPBJ0980_pilon (Unplaced) Diploidocus:PRIMARY|PRIMARY|PRIMARY|PRIMARY|PRIMARY|PRIMARY	WEAK|DIP|PART|SEC|REP|NONE	GOOD|EXS|REPT|TOP|REP|NONE	PURE|DIP|UNIQ|SEC|REP|NONE	PRIMARY	PRIMARY	PRIMARY	keep	7
BASENJISCAFF0760	877	9	8.4903	100	877	10	1	0.5012	13	87	0	0	BASENJISCAFF0003	BASENJISCAFF0913	32.5	52.57	KEEP	1	0	1	258.437	0	52178.6	0.51539	46.181	0	0	FALSE	FALSE	-1	-1	0	0	0	0	0	0	BASPBJ0983_pilon (Unplaced)	PURE|HAP|PART|TOP|PRI|NONE	GOOD|EXS|REPT|TOP|REP|NONE	PURE|HAP|HOMO|SEC|REP|NONE	HPURGE	PRIMARY	HPURGE	quarantine	1
BASENJISCAFF0761	1542	15	12.9767	100	1542	20	5	0.5506	26.72	73.28	0	0	BASENJISCAFF0566	BASENJISCAFF0512	72.24	116.02	KEEP	0	0	1	15.403	0	2557.28	0.56031	32.2559	0	0	FALSE	FALSE	-1	-1	0	0	0	0	0	0	BASPBJ0984_pilon (Unplaced)	GOOD|HAP|HOMO|NON|PRI|NONE	PURE|HAP|HOMO|TOP|ALT|NONE	GOOD|EXS|HOMO|SEC|PRI|NONE	HPURGE	HPURGE	COLLAPSED	quarantine	1
BASENJISCAFF0762	9839	106	84.9492	100	9839	93	118	0.5078	0.01	13.73	22.78	63.48	BASENJISCAFF0284	BASENJISCAFF1053	98.17	3221.63	REPEAT	0	0	720	1155.92	329924	353221	0.51621	93.3965	0	0	FALSE	FALSE	-1	-1	0	0	0	0	0	0	BASPBJ0985_pilon (Unplaced) Diploidocus:PRIMARY|PRIMARY|PRIMARY|PRIMARY|PRIMARY|PRIMARY	GOOD|EXS|REPT|NON|REP|NONE	GOOD|EXS|HOMO|TOP|REP|NONE	GOOD|EXS|REPT|TOP|REP|NONE	PRIMARY	PRIMARY	PRIMARY	keep	7
BASENJISCAFF0763	1146	8	7.4721	100	1146	5	8	0.5631	45.64	54.36	0	0	-	-	0	0	KEEP	0	0	1	61.2205	33	11484	0.58202	56.7857	0	0	FALSE	FALSE	-1	-1	0	0	0	0	0	0	BASPBJ0986_pilon (Unplaced)	GOOD|HAP|UNIQ|NON|PRI|NONE	-	-	HPURGE	-	-	quarantine	1
BASENJISCAFF0764	909	0	0	0	0	0	0	0	100	0	0	0	-	-	0	0	KEEP	0	0	1	305.719	0	8306.18	0.55006	8.83352	0	0	FALSE	FALSE	-1	-1	0	0	0	0	0	0	BASPBJ0987_pilon (Unplaced)	LOWX|LOW|UNIQ|NON|PRI|NONE	-	-	LOWCOV	-	-	junk	1
BASENJISCAFF0765	986	13	12.1197	100	986	8	8	0.5538	19.47	80.53	0	0	BASENJICHR35.02	BASENJISCAFF0686	80.53	100.41	KEEP	0	0	1	49.0719	178	6454.22	0.56795	65.7292	0	0	FALSE	FALSE	-1	-1	0	0	0	0	0	0	BASPBJ0989_pilon (Unplaced)	PURE|HAP|HOMO|NON|PRI|NONE	GOOD|EXS|REPT|TOP|REP|NONE	GOOD|EXS|HOMO|TOP|REP|NONE	HPURGE	PRIMARY	PRIMARY	quarantine	1
BASENJISCAFF0766	1620	67	64.7617	100	1620	62	49	0.5485	0	0.309	58.77	40.93	BASENJICHR1.02	BASENJICHR35.02	88.77	330.74	KEEP	0	1	10	5834.07	5815	192083	0.56852	98.3062	0	0	FALSE	FALSE	-1	-1	0	0	0	0	0	0	BASPBJ0990_pilon (Unplaced) Diploidocus:COLLAPSED|PRIMARY|PRIMARY|PRIMARY|PRIMARY|PRIMARY	GOOD|DIP|REPT|SEC|REP|NONE	WEAK|DIP|REPT|TOP|REP|NONE	GOOD|EXS|REPT|TOP|REP|NONE	PRIMARY	PRIMARY	PRIMARY	keep	7
BASENJISCAFF0767	9860	0	2.9505	38.144	3761	30	18	0.406	90.87	4.625	4.503	0	BASENJICHR26.01	BASENJICHR19.01	89.63	177.57	KEEP	0	0	1	456.529	0	15594.5	0.4354	35.1841	0	0	FALSE	FALSE	-1	-1	0	0	0	0	0	0	BASPBJ0991_pilon (Unplaced)	LOWX|LOW|HOMO|NON|PRI|NONE	PURE|DIP|UNIQ|TOP|PRI|COMP	PURE|DIP|UNIQ|TOP|PRI|COMP	LOWCOV	PRIMARY	PRIMARY	junk	1
BASENJISCAFF0768	1330	18	16.7707	100	1330	22	4	0.5142	6.466	93.53	0	0	BASENJISCAFF0400	BASENJISCAFF0284	61.95	120.83	KEEP	0	3	455	888.015	250081	236132	0.52707	79.908	0	0	FALSE	FALSE	-1	-1	0	0	0	0	0	0	BASPBJ0992_pilon (Unplaced)	PURE|HAP|HOMO|SEC|REP|NONE	WEAK|EXS|HOMO|TOP|REP|NONE	GOOD|EXS|REPT|TOP|REP|NONE	HPURGE	PRIMARY	PRIMARY	quarantine	1
BASENJISCAFF0769	672	2	2.0238	100	672	1	2	0.3752	100	0	0	0	-	-	0	0	JUNK	0	0	2706	3167.88	117930	135584	0.37946	79.7214	0	0	FALSE	FALSE	-1	-1	0	0	0	0	0	0	BASPBJ0993_pilon (Unplaced)	LOWX|LOW|UNIQ|NON|REP|NONE	-	-	LOWCOV	-	-	junk	1
BASENJISCAFF0770	2862	10	9.4941	100	2862	8	6	0.5118	21.28	78.72	0	0	BASENJISCAFF0162	BASENJISCAFF0166	95.98	212.23	KEEP	0	0	1416	1601.72	154293	195466	0.51293	87.4824	0	0	FALSE	FALSE	-1	-1	0	0	0	0	0	0	BASPBJ0995_pilon (Unplaced)	GOOD|HAP|HOMO|NON|REP|NONE	GOOD|DIP|REPT|TOP|REP|NONE	PURE|HAP|REPT|SEC|REP|NONE	HPURGE	PRIMARY	HPURGE	quarantine	1
BASENJISCAFF0771	85108	466	580.633	100	85108	3729	3074	0.4607	0.011	0.001	0.002	99.99	-	-	0	0	JUNK	0	0	111	593.861	23659	144174	0.49765	93.3594	0	0	FALSE	FALSE	-1	-1	0	0	0	0	0	0	BASPBJ0996_pilon (Unplaced) Diploidocus:COLLAPSED|COLLAPSED|COLLAPSED|COLLAPSED|COLLAPSED|COLLAPSED	PURE|EXS|UNIQ|NON|REP|NONE	-	-	COLLAPSED	-	-	repeat	7
BASENJISCAFF0772	2753	53	52.3273	100	2753	61	57	0.5461	0	10.72	80.02	9.263	-	-	0	0	KEEP	0	0	4	107.824	1809	19351.7	0.56629	100	0	0	FALSE	FALSE	-1	-1	0	0	0	0	0	0	BASPBJ0997_pilon (Unplaced) Diploidocus:PRIMARY|PRIMARY|PRIMARY|PRIMARY|PRIMARY|PRIMARY	PURE|DIP|UNIQ|NON|REP|NONE	-	-	PRIMARY	-	-	keep	7
BASENJISCAFF0773	5197	22	19.6746	100	5197	17	28	0.501	13.93	53.05	33.02	0	BASENJISCAFF0473	BASENJISCAFF0269	95.61	1153.51	REPEAT	0	0	1625	1659.18	186377	227880	0.51414	87.662	0	0	FALSE	FALSE	-1	-1	0	0	0	0	0	0	BASPBJ0998_pilon (Unplaced) Diploidocus:PRIMARY|PRIMARY|PRIMARY|PRIMARY|PRIMARY|PRIMARY	GOOD|HAP|REPT|NON|REP|NONE	GOOD|EXS|REPT|TOP|REP|NONE	WEAK|EXS|REPT|TOP|REP|NONE	PRIMARY	PRIMARY	PRIMARY	keep	7
BASENJISCAFF0774	1782	7	6.6543	100	1782	9	3	0.5113	58.47	41.53	0	0	BASENJISCAFF0135	BASENJISCAFF0114	56.96	158.53	KEEP	0	0	1574	1580.14	169662	195512	0.52245	82.7449	0	0	FALSE	FALSE	-1	-1	0	0	0	0	0	0	BASPBJ0999_pilon (Unplaced)	GOOD|LOW|HOMO|NON|REP|NONE	WEAK|LOW|REPT|TOP|REP|NONE	PURE|HAP|HOMO|SEC|REP|NONE	HPURGE	KEEP	HPURGE	quarantine	1
BASENJISCAFF0775	3234	109	100.17	100	3234	80	84	0.548	0	10.27	8.071	81.66	-	-	0	0	JUNK	0	0	18	211.56	6492	34483.5	0.57607	89.0898	0	0	FALSE	FALSE	-1	-1	0	0	0	0	0	0	BASPBJ1000_pilon (Unplaced) Diploidocus:COLLAPSED|COLLAPSED|COLLAPSED|COLLAPSED|COLLAPSED|COLLAPSED	PURE|EXS|UNIQ|NON|REP|NONE	-	-	COLLAPSED	-	-	repeat	7
BASENJISCAFF0776	1670	18	16.6018	99.9401	1669	25	2	0.5083	2.216	97.78	0	0	BASENJISCAFF0473	BASENJISCAFF0135	68.62	555.63	KEEP	0	0	20	1103.08	3351	145378	0.52156	71.2895	0	0	FALSE	FALSE	-1	-1	0	0	0	0	0	0	BASPBJ1001_pilon (Unplaced)	PURE|HAP|REPT|NON|REP|NONE	GOOD|EXS|REPT|TOP|REP|NONE	WEAK|LOW|REPT|TOP|REP|NONE	HPURGE	PRIMARY	KEEP	quarantine	1
BASENJISCAFF0777	16963	894	907.319	100	16963	1750	1622	0.4469	0.1	0.012	0	99.89	-	-	0	0	JUNK	0	0	1	531.36	1	19620.3	0.44167	50.2686	0	0	FALSE	FALSE	-1	-1	0	0	0	0	0	0	BASPBJ1003_pilon (Unplaced) Diploidocus:COLLAPSED|COLLAPSED|COLLAPSED|COLLAPSED|COLLAPSED|COLLAPSED	PURE|EXS|UNIQ|NON|PRI|NONE	-	-	COLLAPSED	-	-	repeat	7
BASENJISCAFF0778	210	1	1	100	210	1	0	0.5257	100	0	0	0	-	-	0	0	JUNK	0	0	1	16.9946	0	2872.39	0.54286	40.2174	0	0	FALSE	FALSE	-1	-1	0	0	0	0	0	0	BASPBJ1004_pilon (Unplaced)	LOWX|LOW|UNIQ|NON|PRI|NONE	-	-	LOWCOV	-	-	junk	1
BASENJISCAFF0779	1120	41	36.9071	100	1120	28	27	0.5497	0.536	17.32	82.14	0	-	-	0	0	KEEP	0	0	4	151.009	1455	24806.7	0.56964	93.9671	0	0	FALSE	FALSE	-1	-1	0	0	0	0	0	0	BASPBJ1005_pilon (Unplaced) Diploidocus:PRIMARY|PRIMARY|PRIMARY|PRIMARY|PRIMARY|PRIMARY	PURE|DIP|UNIQ|NON|REP|NONE	-	-	PRIMARY	-	-	keep	7
BASENJISCAFF0780	10379	539	525.254	100	10379	520	380	0.5073	0	0	0	100	-	-	0	0	JUNK	0	0	741	1023.61	330048	305179	0.51209	97.1409	0	0	FALSE	FALSE	-1	-1	0	0	0	0	0	0	BASPBJ1006_pilon (Unplaced) Diploidocus:COLLAPSED|COLLAPSED|COLLAPSED|COLLAPSED|COLLAPSED|COLLAPSED	PURE|EXS|UNIQ|NON|REP|NONE	-	-	COLLAPSED	-	-	repeat	7
BASENJISCAFF0781	3631	18	15.8846	100	3631	35	1	0.5078	1.597	98.4	0	0	BASENJISCAFF0299	BASENJISCAFF0664	91.99	1029.52	KEEP	0	0	881	1566.52	88357	193299	0.51473	74.7295	0	0	FALSE	FALSE	-1	-1	0	0	0	0	0	0	BASPBJ1007_pilon (Unplaced)	PURE|HAP|REPT|NON|REP|NONE	GOOD|EXS|REPT|TOP|REP|NONE	GOOD|HAP|REPT|TOP|REP|NONE	HPURGE	COLLAPSED	PRIMARY	quarantine	1
BASENJISCAFF0782	3324	45	47.4449	100	3324	62	43	0.5512	0	0.301	99.7	0	-	-	0	0	KEEP	1	1	5	134.213	2530	24988.8	0.5722	100	0	0	FALSE	FALSE	-1	-1	0	0	0	0	0	0	BASPBJ1008_pilon (Unplaced) Diploidocus:PRIMARY|PRIMARY|PRIMARY|PRIMARY|PRIMARY|PRIMARY	PURE|DIP|UNIQ|TOP|REP|NONE	-	-	PRIMARY	-	-	keep	7
BASENJISCAFF0783	58869	997	1299.11	100	58869	5403	1144	0.5075	0	0.048	0.015	99.94	-	-	0	0	JUNK	0	0	634	1027.18	294716	307765	0.50989	84.4926	0	0	FALSE	FALSE	-1	-1	0	0	0	0	0	0	BASPBJ1009_pilon (Unplaced) Diploidocus:COLLAPSED|COLLAPSED|COLLAPSED|COLLAPSED|COLLAPSED|COLLAPSED	PURE|EXS|UNIQ|NON|REP|NONE	-	-	COLLAPSED	-	-	repeat	7
BASENJISCAFF0784	1365	1	1.3114	94.0659	1284	0	4	0.5023	100	0	0	0	-	-	0	0	JUNK	0	0	1	304.864	0	41438	0.52088	30.8439	0	0	FALSE	FALSE	-1	-1	0	0	0	0	0	0	BASPBJ1010_pilon (Unplaced)	LOWX|LOW|UNIQ|NON|PRI|NONE	-	-	LOWCOV	-	-	junk	1
BASENJISCAFF0785	29841	30	36.6465	100	29841	31	265	0.511	0.007	41.29	49.17	9.534	BASENJISCAFF0473	BASENJICHR11.02	98.05	7742.48	REPEAT	0	0	1835	1979.19	209622	272631	0.51583	91.615	0	0	FALSE	FALSE	-1	-1	0	0	0	0	0	0	BASPBJ1012_pilon (Unplaced) Diploidocus:PRIMARY|PRIMARY|PRIMARY|PRIMARY|PRIMARY|PRIMARY	WEAK|DIP|REPT|NON|REP|NONE	GOOD|EXS|REPT|TOP|REP|NONE	GOOD|DIP|REPT|TOP|REP|NONE	PRIMARY	PRIMARY	PRIMARY	keep	7
BASENJISCAFF0786	1904	14	12.6849	99.9475	1903	13	8	0.5176	15.86	84.14	0	0	BASENJISCAFF0135	BASENJISCAFF0341	96.22	310.24	REPEAT	0	0	1606	1709.78	172188	211991	0.51891	86.1555	0	0	FALSE	FALSE	-1	-1	0	0	0	0	0	0	BASPBJ1013_pilon (Unplaced)	PURE|HAP|REPT|NON|REP|NONE	WEAK|LOW|REPT|TOP|REP|NONE	PURE|DIP|UNIQ|TOP|REP|NONE	HPURGE	KEEP	PRIMARY	quarantine	1
BASENJISCAFF0787	2969	139	116.063	78.545	2332	111	116	0.5532	21.56	0.06755	1.145	77.23	-	-	0	0	JUNK	0	0	3	94.859	1979	16139.6	0.57056	78.2535	0	0	FALSE	FALSE	-1	-1	0	0	0	0	0	0	BASPBJ1015_pilon (Unplaced) Diploidocus:COLLAPSED|COLLAPSED|COLLAPSED|COLLAPSED|COLLAPSED|COLLAPSED	GOOD|EXS|UNIQ|NON|REP|NONE	-	-	COLLAPSED	-	-	repeat	7
BASENJISCAFF0788	2841	56	51.3189	99.9648	2840	44	49	0.5522	0.0352	3.731	96.23	0	-	-	0	0	KEEP	1	0	4	131.091	1999	22972.7	0.56952	99.2895	0	0	FALSE	FALSE	-1	-1	0	0	0	0	0	0	BASPBJ1018_pilon (Unplaced) Diploidocus:PRIMARY|PRIMARY|PRIMARY|PRIMARY|PRIMARY|PRIMARY	PURE|DIP|UNIQ|TOP|REP|NONE	-	-	PRIMARY	-	-	keep	7
BASENJISCAFF0789	620	13	12.4903	100	620	15	1	0.5049	2.419	97.58	0	0	BASENJISCAFF0277	BASENJISCAFF0003	58.71	177.9	KEEP	0	1	1	323.943	0	66061	0.51935	48.1482	0	0	FALSE	FALSE	-1	-1	0	0	0	0	0	0	BASPBJ1019_pilon (Unplaced)	PURE|HAP|HOMO|SEC|PRI|NONE	GOOD|EXS|REPT|TOP|REP|NONE	GOOD|EXS|REPT|TOP|REP|NONE	HPURGE	PRIMARY	PRIMARY	quarantine	1
BASENJISCAFF0790	4069	193	186.687	100	4069	204	204	0.55	0	0	0.319	99.68	-	-	0	0	JUNK	0	0	13	144.855	6602	28247.7	0.57287	97.9718	0	0	FALSE	FALSE	-1	-1	0	0	0	0	0	0	BASPBJ1020_pilon (Unplaced) Diploidocus:COLLAPSED|COLLAPSED|COLLAPSED|COLLAPSED|COLLAPSED|COLLAPSED	PURE|EXS|UNIQ|NON|REP|NONE	-	-	COLLAPSED	-	-	repeat	7
BASENJISCAFF0791	1420	15	13.7676	100	1420	10	22	0.5516	43.66	39.93	16.41	0	BASENJICHR35.02	BASENJICHR1.02	53.8	124.86	KEEP	0	0	1	80.7087	0	12662.7	0.56408	47.0588	0	0	FALSE	FALSE	-1	-1	0	0	0	0	0	0	BASPBJ1021_pilon (Unplaced)	WEAK|LOW|HOMO|NON|PRI|NONE	GOOD|EXS|REPT|TOP|REP|NONE	GOOD|DIP|REPT|TOP|REP|NONE	HPURGE	PRIMARY	PRIMARY	quarantine	1
BASENJISCAFF0792	810	1	1	100	810	1	0	0.364	100	0	0	0	-	-	0	0	JUNK	0	0	1	174.375	0	4348.02	0.37284	29.7194	0	0	FALSE	FALSE	-1	-1	0	0	0	0	0	0	BASPBJ1022_pilon (Unplaced)	LOWX|LOW|UNIQ|NON|PRI|NONE	-	-	LOWCOV	-	-	junk	1
BASENJISCAFF0793	1222	2	1.5957	100	1222	1	1	0.5646	100	0	0	0	-	-	0	0	JUNK	0	0	1	16.4239	0	2278.33	0.5761	22.1572	0	0	FALSE	FALSE	-1	-1	0	0	0	0	0	0	BASPBJ1023_pilon (Unplaced)	LOWX|LOW|UNIQ|NON|PRI|NONE	-	-	LOWCOV	-	-	junk	1
BASENJISCAFF0794	19840	457	507.995	100	19840	554	655	0.5009	0	0	0.02	99.98	-	-	0	0	JUNK	0	0	656	1277.24	269262	305591	0.50806	99.0714	0	0	FALSE	FALSE	-1	-1	0	0	0	0	0	0	BASPBJ1024_pilon (Unplaced) Diploidocus:COLLAPSED|COLLAPSED|COLLAPSED|COLLAPSED|COLLAPSED|COLLAPSED	PURE|EXS|UNIQ|NON|REP|NONE	-	-	COLLAPSED	-	-	repeat	7
BASENJISCAFF0795	6003	12	10.966	100	6003	11	6	0.5059	14.88	85.12	0	0	BASENJISCAFF0960	BASENJISCAFF0664	99.92	365.68	REPEAT	0	0	1729	1797.53	189277	224861	0.51024	97.4737	0	0	FALSE	FALSE	-1	-1	0	0	0	0	0	0	BASPBJ1025_pilon (Unplaced)	PURE|HAP|REPT|NON|REP|NONE	GOOD|DIP|REPT|TOP|REP|NONE	GOOD|HAP|REPT|TOP|REP|NONE	HPURGE	PRIMARY	PRIMARY	quarantine	1
BASENJISCAFF0796	2262	10	9.5292	100	2262	1	16	0.5097	27.19	72.81	0	0	BASENJISCAFF1096	BASENJISCAFF0664	96.07	566.8	REPEAT	0	0	1	536.3	0	67165.2	0.52166	45.9302	0	0	FALSE	FALSE	-1	-1	0	0	0	0	0	0	BASPBJ1028_pilon (Unplaced)	GOOD|HAP|REPT|NON|PRI|NONE	GOOD|DIP|REPT|TOP|REP|NONE	GOOD|HAP|REPT|TOP|REP|NONE	HPURGE	PRIMARY	PRIMARY	quarantine	1
BASENJISCAFF0797	1275	6	7.309	100	1275	13	0	0.5548	56.47	43.53	0	0	BASENJICHR35.02	BASENJISCAFF0479	57.57	148.24	KEEP	0	0	1	37.3891	0	5610.52	0.57569	33.4668	0	0	FALSE	FALSE	-1	-1	0	0	0	0	0	0	BASPBJ1029_pilon (Unplaced)	GOOD|LOW|HOMO|NON|PRI|NONE	GOOD|EXS|REPT|TOP|REP|NONE	PURE|DIP|UNIQ|SEC|REP|NONE	HPURGE	PRIMARY	PRIMARY	quarantine	1
BASENJISCAFF0798	6597	1	1.2463	99.8787	6589	2	3	0.4045	100	0	0	0	-	-	0	0	JUNK	0	0	1	86.7387	0	2453.52	0.4164	24.2125	0	0	FALSE	FALSE	-1	-1	0	0	0	0	0	0	BASPBJ1030_pilon (Unplaced)	LOWX|LOW|UNIQ|NON|PRI|NONE	-	-	LOWCOV	-	-	junk	1
BASENJISCAFF0799	694	6	5.0879	100	694	4	3	0.5426	100	0	0	0	-	-	0	0	JUNK	0	0	2	60.2799	402	11816.6	0.55764	75.1497	0	0	FALSE	FALSE	-1	-1	0	0	0	0	0	0	BASPBJ1031_pilon (Unplaced)	PURE|LOW|UNIQ|NON|ALT|NONE	-	-	HPURGE	-	-	quarantine	1
BASENJISCAFF0800	5328	338	323.567	100	5328	316	315	0.5471	0	0.131	0.263	99.61	-	-	0	0	JUNK	0	0	225	195.698	30172	34064.7	0.57489	98.9061	0	0	FALSE	FALSE	-1	-1	0	0	0	0	0	0	BASPBJ1032_pilon (Unplaced) Diploidocus:COLLAPSED|COLLAPSED|COLLAPSED|COLLAPSED|COLLAPSED|COLLAPSED	PURE|EXS|UNIQ|NON|REP|NONE	-	-	COLLAPSED	-	-	repeat	7
BASENJISCAFF0801	3232	29	26.737	100	3232	27	26	0.503	8.323	38.86	52.82	0	BASENJISCAFF0284	BASENJISCAFF0190	71.38	622.8	KEEP	0	1	758	1202.22	351522	367391	0.50928	98.0037	0	0	FALSE	FALSE	-1	-1	0	0	0	0	0	0	BASPBJ1034_pilon (Unplaced) Diploidocus:PRIMARY|PRIMARY|PRIMARY|PRIMARY|PRIMARY|PRIMARY	GOOD|DIP|REPT|SEC|REP|NONE	GOOD|EXS|HOMO|TOP|REP|NONE	WEAK|EXS|REPT|TOP|REP|NONE	PRIMARY	PRIMARY	PRIMARY	keep	7
BASENJISCAFF0802	317	0	0	0	0	0	0	0	100	0	0	0	-	-	0	0	KEEP	0	0	1	157.241	0	7047.15	0.42587	38.1443	0	0	FALSE	FALSE	-1	-1	0	0	0	0	0	0	BASPBJ1036_pilon (Unplaced)	LOWX|LOW|UNIQ|NON|PRI|NONE	-	-	LOWCOV	-	-	junk	1
BASENJISCAFF0803	1379	2	2.5961	100	1379	2	2	0.3758	100	0	0	0	-	-	0	0	JUNK	0	0	3	1514.65	49	55359.9	0.41407	56.9845	0	0	FALSE	FALSE	-1	-1	0	0	0	0	0	0	BASPBJ1037_pilon (Unplaced)	LOWX|LOW|UNIQ|NON|REP|NONE	-	-	LOWCOV	-	-	junk	1
BASENJISCAFF0804	1963	47	44.6775	100	1963	46	49	0.5554	0	2.904	97.1	0	-	-	0	0	KEEP	0	1	4	117.761	2190	20552	0.5731	100	0	0	FALSE	FALSE	-1	-1	0	0	0	0	0	0	BASPBJ1039_pilon (Unplaced) Diploidocus:PRIMARY|PRIMARY|PRIMARY|PRIMARY|PRIMARY|PRIMARY	PURE|DIP|UNIQ|SEC|REP|NONE	-	-	PRIMARY	-	-	keep	7
BASENJISCAFF0805	18018	79	79.2705	100	18018	78	120	0.5092	0	15.07	24.99	59.94	BASENJISCAFF0299	BASENJISCAFF0810	96.04	2405.08	REPEAT	0	0	1943	2122.17	223063	289346	0.51515	97.9435	0	0	FALSE	FALSE	-1	-1	0	0	0	0	0	0	BASPBJ1040_pilon (Unplaced) Diploidocus:PRIMARY|PRIMARY|PRIMARY|PRIMARY|PRIMARY|PRIMARY	GOOD|EXS|REPT|NON|REP|NONE	GOOD|EXS|REPT|TOP|REP|NONE	GOOD|DIP|REPT|TOP|REP|NONE	PRIMARY	PRIMARY	PRIMARY	keep	7
BASENJISCAFF0806	1035	11	10.5778	100	1035	8	6	0.5019	11.79	88.21	0	0	BASENJISCAFF0572	BASENJISCAFF0404	45.6	417.87	KEEP	0	0	30	783.658	16113	161427	0.51111	89.5937	0	0	FALSE	FALSE	-1	-1	0	0	0	0	0	0	BASPBJ1041_pilon (Unplaced)	PURE|HAP|PART|NON|REP|NONE	GOOD|DIP|REPT|TOP|REP|NONE	WEAK|DIP|REPT|SEC|REP|NONE	HPURGE	PRIMARY	PRIMARY	quarantine	1
BASENJISCAFF0807	1436	6	6.4791	99.7214	1432	11	0	0.5466	69.78	30.22	0	0	BASENJICHR35.02	BASENJISCAFF0718	74.44	139.76	KEEP	0	0	1	38.2603	0	6270.6	0.56964	31.9858	0	0	FALSE	FALSE	-1	-1	0	0	0	0	0	0	BASPBJ1042_pilon (Unplaced)	GOOD|LOW|HOMO|NON|PRI|NONE	GOOD|EXS|REPT|TOP|REP|NONE	PURE|DIP|UNIQ|SEC|REP|NONE	HPURGE	PRIMARY	PRIMARY	quarantine	1
BASENJISCAFF0808	94415	40	40.5447	100	94415	241	261	0.5078	1.713	17.64	79.2	1.45	BASENJISCAFF0299	BASENJISCAFF0810	98.46	1718.07	REPEAT	0	0	1777	1990.65	207373	260752	0.51211	99.2319	0	0	FALSE	FALSE	-1	-1	0	0	0	0	0	0	BASPBJ1044_pilon (Unplaced) Diploidocus:PRIMARY|PRIMARY|PRIMARY|PRIMARY|PRIMARY|PRIMARY	GOOD|DIP|REPT|NON|REP|NONE	GOOD|EXS|REPT|TOP|REP|NONE	GOOD|DIP|REPT|TOP|REP|NONE	PRIMARY	PRIMARY	PRIMARY	keep	7
BASENJISCAFF0809	2020	2	1.8243	100	2020	3	0	0.5083	100	0	0	0	-	-	0	0	JUNK	0	0	1	86.1916	0	13044	0.50644	9.17753	0	0	FALSE	FALSE	-1	-1	0	0	0	0	0	0	BASPBJ1045_pilon (Unplaced)	LOWX|LOW|UNIQ|NON|PRI|NONE	-	-	LOWCOV	-	-	junk	1
BASENJISCAFF0810	83578	52	60.3115	100	83578	361	291	0.5075	0.01	4.632	62.49	32.87	BASENJISCAFF0299	BASENJISCAFF0905	93.07	1883.45	KEEP	1	5	1738	1865.41	202745	251444	0.51074	99.787	0	0	FALSE	FALSE	-1	-1	0	0	0	0	0	0	BASPBJ1046_pilon (Unplaced) Diploidocus:PRIMARY|PRIMARY|PRIMARY|PRIMARY|PRIMARY|PRIMARY	GOOD|DIP|REPT|TOP|REP|NONE	GOOD|EXS|REPT|TOP|REP|NONE	PURE|DIP|UNIQ|SEC|REP|NONE	PRIMARY	PRIMARY	PRIMARY	keep	7
BASENJISCAFF0811	53328	26	27.337	100	53328	100	103	0.5089	2.085	44.64	53.27	0	BASENJISCAFF0076	BASENJISCAFF0905	99.98	942.02	REPEAT	0	0	1786	1950	208159	265653	0.51134	99.8537	0	0	FALSE	FALSE	-1	-1	0	0	0	0	0	0	BASPBJ1047_pilon (Unplaced) Diploidocus:PRIMARY|PRIMARY|PRIMARY|PRIMARY|PRIMARY|PRIMARY	GOOD|DIP|REPT|NON|REP|NONE	PURE|DIP|UNIQ|TOP|REP|NONE	PURE|DIP|UNIQ|SEC|REP|NONE	PRIMARY	PRIMARY	PRIMARY	keep	7
BASENJISCAFF0812	645	1	0.9953	99.5349	642	1	0	0.4694	100	0	0	0	-	-	0	0	JUNK	0	0	1	2.2504	0	588.604	0.47752	13.0856	0	0	FALSE	FALSE	-1	-1	0	0	0	0	0	0	BASPBJ1048_pilon (Unplaced)	LOWX|LOW|UNIQ|NON|PRI|NONE	-	-	LOWCOV	-	-	junk	1
BASENJISCAFF0813	579	0	0	0	0	0	0	0	100	0	0	0	-	-	0	0	KEEP	0	0	1	76.4684	0	13669	0.51641	15.5515	0	0	FALSE	FALSE	-1	-1	0	0	0	0	0	0	BASPBJ1049_pilon (Unplaced)	LOWX|LOW|UNIQ|NON|PRI|NONE	-	-	LOWCOV	-	-	junk	1
BASENJISCAFF0814	619	2	1.9919	100	619	0	2	0.4067	100	0	0	0	-	-	0	0	JUNK	0	0	1	995.167	1	39430.4	0.40711	51.2648	0	0	FALSE	FALSE	-1	-1	0	0	0	0	0	0	BASPBJ1050_pilon (Unplaced)	LOWX|LOW|UNIQ|NON|PRI|NONE	-	-	LOWCOV	-	-	junk	1
BASENJISCAFF0815	2703	1	10.4647	79.0603	2137	1	36	0.3952	51.72	42.58	5.697	0	BASENJICHR10.01	BASENJICHR1.01	49.13	183.13	KEEP	0	0	3	1963.55	54	75981.3	0.45246	53.2686	0	0	FALSE	FALSE	-1	-1	0	0	0	0	0	0	BASPBJ1052_pilon (Unplaced)	LOWX|LOW|PART|NON|REP|NONE	PURE|DIP|UNIQ|TOP|PRI|COMP|+VEC	PURE|DIP|UNIQ|TOP|PRI|COMP|+VEC	LOWCOV	PRIMARY	PRIMARY	junk	1
BASENJISCAFF0816	11121	41	49.8	100	11121	125	141	0.4664	18.76	12.45	30.13	38.66	BASENJICHR35.02	BASENJICHR38.01	99.61	1891.61	REPEAT	0	0	6	585.757	1347	34423.1	0.43314	83.3619	0	0	FALSE	FALSE	-1	-1	0	0	0	0	0	0	BASPBJ1053_pilon (Unplaced) Diploidocus:PRIMARY|PRIMARY|PRIMARY|PRIMARY|PRIMARY|PRIMARY	WEAK|EXS|REPT|NON|REP|NONE	GOOD|EXS|REPT|TOP|REP|NONE	PURE|DIP|UNIQ|SEC|PRI|COMP	PRIMARY	PRIMARY	PRIMARY	keep	7
BASENJISCAFF0817	1921	26	24.8037	100	1921	24	19	0.507	1.249	46.69	52.06	0	BASENJISCAFF0284	BASENJISCAFF0122	95.58	490.63	REPEAT	0	0	701	1073.34	345499	346326	0.51119	98.9446	0	0	FALSE	FALSE	-1	-1	0	0	0	0	0	0	BASPBJ1054_pilon (Unplaced) Diploidocus:PRIMARY|PRIMARY|PRIMARY|PRIMARY|PRIMARY|PRIMARY	GOOD|DIP|REPT|NON|REP|NONE	GOOD|EXS|HOMO|TOP|REP|NONE	PURE|DIP|UNIQ|TOP|REP|NONE	PRIMARY	PRIMARY	PRIMARY	keep	7
BASENJISCAFF0818	1315	47	46.3787	100	1315	26	40	0.4862	0	1.293	98.71	0	-	-	0	0	KEEP	0	0	4	326.597	839	64608.4	0.49202	74.8642	0	0	FALSE	FALSE	-1	-1	0	0	0	0	0	0	BASPBJ1055_pilon (Unplaced) Diploidocus:PRIMARY|PRIMARY|PRIMARY|PRIMARY|PRIMARY|PRIMARY	PURE|DIP|UNIQ|NON|REP|NONE	-	-	PRIMARY	-	-	keep	7
BASENJISCAFF0819	7708	39	69.6046	99.9222	7702	139	109	0.5557	0.8303	13.32	45.58	40.27	BASENJICHR35.02	BASENJICHR1.02	92.62	242.76	KEEP	0	2	1	92.4551	238	15075.9	0.56591	60.0885	0	0	FALSE	FALSE	-1	-1	0	0	0	0	0	0	BASPBJ1056_pilon (Unplaced) Diploidocus:PRIMARY|PRIMARY|PRIMARY|PRIMARY|PRIMARY|PRIMARY	WEAK|DIP|HOMO|SEC|PRI|NONE	GOOD|EXS|REPT|TOP|REP|NONE	WEAK|DIP|REPT|TOP|REP|NONE	PRIMARY	PRIMARY	PRIMARY	keep	7
BASENJISCAFF0820	391	4	3.8619	98.977	387	4	0	0.5061	100	0	0	0	-	-	0	0	JUNK	0	0	13	639.54	1639	174023	0.51151	68.4931	0	0	FALSE	FALSE	-1	-1	0	0	0	0	0	0	BASPBJ1057_pilon (Unplaced)	PURE|LOW|UNIQ|NON|REP|NONE	-	-	LOWQUAL	-	-	quarantine	1
BASENJISCAFF0821	8233	208	202.176	100	8233	244	284	0.5451	3.158	1.785	4.033	91.02	-	-	0	0	JUNK	0	0	6	122.83	2662	22609.1	0.56832	96.4421	0	0	FALSE	FALSE	-1	-1	0	0	0	0	0	0	BASPBJ1058_pilon (Unplaced) Diploidocus:COLLAPSED|COLLAPSED|COLLAPSED|COLLAPSED|COLLAPSED|COLLAPSED	PURE|EXS|UNIQ|NON|REP|NONE	-	-	COLLAPSED	-	-	repeat	7
BASENJISCAFF0822	485	1	1	100	485	1	0	0.2904	100	0	0	0	-	-	0	0	JUNK	0	0	1	1.05229	0	5.54031	0.29691	5.01089	0	0	FALSE	FALSE	-1	-1	0	0	0	0	0	0	BASPBJ1061_pilon (Unplaced)	LOWX|LOW|UNIQ|NON|PRI|NONE	-	-	LOWCOV	-	-	junk	1
BASENJISCAFF0823	733	1	1.281	99.1814	727	2	0	0.5555	100	0	0	0	-	-	0	0	JUNK	0	0	1	32.0396	0	6748.81	0.57026	35.6436	0	0	FALSE	FALSE	-1	-1	0	0	0	0	0	0	BASPBJ1062_pilon (Unplaced)	LOWX|LOW|UNIQ|NON|PRI|NONE	-	-	LOWCOV	-	-	junk	1
BASENJISCAFF0824	4513	19	18.3084	100	4513	1	34	0.5087	8.531	81.76	9.705	0	BASENJISCAFF0748	BASENJISCAFF0585	88.19	1864.39	KEEP	0	2	884	1358.78	347733	363947	0.51296	97.5039	0	0	FALSE	FALSE	-1	-1	0	0	0	0	0	0	BASPBJ1063_pilon (Unplaced)	PURE|HAP|REPT|SEC|REP|NONE	WEAK|LOW|REPT|TOP|REP|NONE	WEAK|DIP|REPT|TOP|REP|NONE	HPURGE	PRIMARY	PRIMARY	quarantine	1
BASENJISCAFF0825	1472	18	18.9891	100	1472	16	16	0.5412	0.34	94.43	5.231	0	BASENJICHR35.02	BASENJISCAFF0382	81.66	322.01	KEEP	0	0	2	82.0657	981	14809.8	0.55774	95.7123	0	0	FALSE	FALSE	-1	-1	0	0	0	0	0	0	BASPBJ1066_pilon (Unplaced) Diploidocus:PRIMARY	PURE|HAP|REPT|NON|ALT|NONE	GOOD|EXS|REPT|TOP|REP|NONE	GOOD|DIP|REPT|SEC|REP|NONE	HPURGE	PRIMARY	PRIMARY	quarantine	2
BASENJISCAFF0826	2018	5	4.5357	100	2018	9	1	0.3988	100	0	0	0	-	-	0	0	JUNK	0	0	2936	3689.71	123587	136065	0.39643	80.6225	0	0	FALSE	FALSE	-1	-1	0	0	0	0	0	0	BASPBJ1068_pilon (Unplaced)	PURE|LOW|UNIQ|NON|REP|NONE	-	-	HPURGE	-	-	quarantine	1
BASENJISCAFF0827	2502	84	80.9696	99.9201	2500	101	98	0.5005	0.2398	17.19	24.18	58.39	BASENJICHR10.01	BASENJICHR19.01	73.5	403.12	KEEP	0	0	1	2053.51	164	61856	0.502	62.9645	0	0	FALSE	FALSE	-1	-1	0	0	0	0	0	0	BASPBJ1069_pilon (Unplaced) Diploidocus:PRIMARY|PRIMARY|PRIMARY|PRIMARY|PRIMARY|PRIMARY	GOOD|EXS|REPT|NON|PRI|NONE	PURE|DIP|UNIQ|TOP|PRI|COMP|+VEC	PURE|DIP|UNIQ|TOP|PRI|COMP	PRIMARY	PRIMARY	PRIMARY	keep	7
BASENJISCAFF0828	5101	2	2.5803	99.9412	5098	3	1	0.5122	100	0	0	0	-	-	0	0	JUNK	0	0	1	8.82089	0	1421.49	0.50755	4.21675	0	0	FALSE	FALSE	-1	-1	0	0	0	0	0	0	BASPBJ1070_pilon (Unplaced)	LOWX|LOW|UNIQ|NON|PRI|NONE	-	-	LOWCOV	-	-	junk	1
BASENJISCAFF0829	2473	28	29.981	100	2473	54	7	0.5096	0.647	44.72	54.63	0	BASENJISCAFF0299	BASENJISCAFF0135	98.54	1406.71	KEEP	0	0	805	1469.39	94092	203985	0.51557	81.5284	0	0	FALSE	FALSE	-1	-1	0	0	0	0	0	0	BASPBJ1071_pilon (Unplaced) Diploidocus:PRIMARY|PRIMARY|PRIMARY|PRIMARY|PRIMARY|PRIMARY	GOOD|DIP|REPT|NON|REP|NONE	GOOD|EXS|REPT|TOP|REP|NONE	WEAK|HAP|REPT|TOP|REP|NONE	PRIMARY	PRIMARY	KEEP	keep	7
BASENJISCAFF0830	1088	0	0	0	0	0	0	0	100	0	0	0	-	-	0	0	KEEP	0	0	1	8.21751	0	1238.94	0.55515	15.0659	0	0	FALSE	FALSE	-1	-1	0	0	0	0	0	0	BASPBJ1072_pilon (Unplaced)	LOWX|LOW|UNIQ|NON|PRI|NONE	-	-	LOWCOV	-	-	junk	1
BASENJISCAFF0831	1265	10	10.264	100	1265	13	1	0.5618	13.04	86.96	0	0	BASENJICHR10.01	BASENJICHR38.01	75.18	443	KEEP	0	0	1	13.753	0	2081.04	0.56522	17.5948	0	0	FALSE	FALSE	-1	-1	0	0	0	0	0	0	BASPBJ1073_pilon (Unplaced)	PURE|HAP|REPT|NON|PRI|NONE	PURE|DIP|UNIQ|TOP|PRI|COMP|+VEC	PURE|DIP|UNIQ|TOP|PRI|COMP	HPURGE	PRIMARY	PRIMARY	quarantine	1
BASENJISCAFF0832	1184	13	15.2095	100	1184	27	1	0.4029	23.14	54.48	22.38	0	BASENJICHR11.01	BASENJICHR1.02	95.02	124.75	HAPLOTIG	0	0	2388	3675.8	117669	138473	0.40287	82.038	0	0	FALSE	FALSE	-1	-1	0	0	0	0	0	0	BASPBJ1074_pilon (Unplaced) Diploidocus:PRIMARY|PRIMARY|PRIMARY|PRIMARY|PRIMARY|PRIMARY	GOOD|HAP|HOMO|NON|REP|NONE	PURE|DIP|UNIQ|TOP|PRI|COMP	WEAK|DIP|REPT|TOP|REP|NONE	PRIMARY	PRIMARY	PRIMARY	keep	7
BASENJISCAFF0833	41648	64	92.3735	100	41648	466	279	0.5037	0	14.01	42.63	43.36	BASENJISCAFF0284	BASENJISCAFF0572	98.78	2253.95	REPEAT	0	0	715	1361.95	318344	326594	0.51121	96.0382	0	0	FALSE	FALSE	-1	-1	0	0	0	0	0	0	BASPBJ1076_pilon (Unplaced) Diploidocus:PRIMARY|PRIMARY|PRIMARY|PRIMARY|PRIMARY|PRIMARY	WEAK|EXS|REPT|NON|REP|NONE	GOOD|EXS|HOMO|TOP|REP|NONE	GOOD|DIP|REPT|TOP|REP|NONE	PRIMARY	PRIMARY	PRIMARY	keep	7
BASENJISCAFF0834	1065	59	53.1343	95.2113	1014	32	42	0.5636	4.789	0.2818	94.93	0	-	-	0	0	KEEP	0	0	5	130.321	2136	20124.6	0.58498	95.2839	0	0	FALSE	FALSE	-1	-1	0	0	0	0	0	0	BASPBJ1077_pilon (Unplaced) Diploidocus:PRIMARY|PRIMARY|PRIMARY|PRIMARY|PRIMARY|PRIMARY	PURE|DIP|UNIQ|NON|REP|NONE	-	-	PRIMARY	-	-	keep	7
BASENJISCAFF0835	1278	10	9.9812	99.9218	1277	0	15	0.5121	20.58	79.42	0	0	BASENJISCAFF0473	BASENJISCAFF0269	97.18	1400.86	REPEAT	0	0	4	887.359	116	114417	0.52504	62.6198	0	0	FALSE	FALSE	-1	-1	0	0	0	0	0	0	BASPBJ1078_pilon (Unplaced)	GOOD|HAP|REPT|NON|REP|NONE	GOOD|EXS|REPT|TOP|REP|NONE	WEAK|EXS|REPT|TOP|REP|NONE	HPURGE	PRIMARY	PRIMARY	quarantine	1
BASENJISCAFF0836	562	3	2.2598	100	562	0	3	0.5304	100	0	0	0	-	-	0	0	JUNK	0	0	1	356.299	0	39932.9	0.51779	47.3881	0	0	FALSE	FALSE	-1	-1	0	0	0	0	0	0	BASPBJ1081_pilon (Unplaced)	PURE|LOW|UNIQ|NON|PRI|NONE	-	-	HPURGE	-	-	quarantine	1
BASENJISCAFF0837	643	11	9.8149	100	643	8	6	0.5711	24.73	75.27	0	0	BASENJISCAFF0454	-	48.68	48.68	KEEP	0	0	1	46.0324	37	7553.77	0.58165	54.295	0	0	FALSE	FALSE	-1	-1	0	0	0	0	0	0	BASPBJ1082_pilon (Unplaced)	GOOD|HAP|PART|NON|PRI|NONE	PURE|DIP|UNIQ|TOP|REP|NONE	-	HPURGE	PRIMARY	-	quarantine	1
BASENJISCAFF0838	3397	6	5.5558	100	3397	8	3	0.5122	90.82	9.185	0	0	-	-	0	0	JUNK	0	0	529	1461.78	61575	184128	0.51192	85.4643	0	0	FALSE	FALSE	-1	-1	0	0	0	0	0	0	BASPBJ1083_pilon (Unplaced)	PURE|LOW|UNIQ|NON|REP|NONE	-	-	HPURGE	-	-	quarantine	1
BASENJISCAFF0839	4842	13	13.1363	100	4842	35	1	0.5076	21.13	78.87	0	0	BASENJISCAFF0299	BASENJISCAFF0070	96.82	1568.44	KEEP	0	0	1758	1735.36	182025	212340	0.51528	73.4219	0	0	FALSE	FALSE	-1	-1	0	0	0	0	0	0	BASPBJ1084_pilon (Unplaced)	GOOD|HAP|REPT|NON|REP|NONE	GOOD|EXS|REPT|TOP|REP|NONE	GOOD|DIP|REPT|TOP|REP|NONE	HPURGE	COLLAPSED	PRIMARY	quarantine	1
BASENJISCAFF0840	1088	12	10.6075	100	1088	1	15	0.5103	10.11	89.89	0	0	BASENJISCAFF0135	BASENJISCAFF0237	71.14	108.36	KEEP	0	0	5	627.061	154	80134.7	0.51195	63.936	0	0	FALSE	FALSE	-1	-1	0	0	0	0	0	0	BASPBJ1086_pilon (Unplaced)	PURE|HAP|HOMO|NON|REP|NONE	WEAK|LOW|REPT|TOP|REP|NONE	GOOD|DIP|REPT|SEC|REP|NONE	HPURGE	KEEP	PRIMARY	quarantine	1
BASENJISCAFF0841	2483	112	109.716	99.6375	2474	106	135	0.5491	1.812	0.8858	43.78	53.52	BASENJICHR35.02	BASENJISCAFF0389	75.55	272.17	KEEP	0	0	4	125.455	2750	25044.2	0.56545	97.0696	0	0	FALSE	FALSE	-1	-1	0	0	0	0	0	0	BASPBJ1088_pilon (Unplaced) Diploidocus:PRIMARY|PRIMARY|PRIMARY|PRIMARY|PRIMARY|PRIMARY	GOOD|EXS|REPT|NON|REP|NONE	GOOD|EXS|REPT|TOP|REP|NONE	WEAK|EXS|HOMO|SEC|REP|NONE	PRIMARY	PRIMARY	KEEP	keep	7
BASENJISCAFF0842	266	1	0.9135	91.3534	243	1	0	0.4938	100	0	0	0	-	-	0	0	JUNK	0	0	1	41.0583	0	12162	0.5188	22.9167	0	0	FALSE	FALSE	-1	-1	0	0	0	0	0	0	BASPBJ1089_pilon (Unplaced)	LOWX|LOW|UNIQ|NON|PRI|NONE	-	-	LOWCOV	-	-	junk	1
BASENJISCAFF0843	1686	25	22.9259	100	1686	21	16	0.5034	8.422	41.76	49.82	0	BASENJISCAFF0284	BASENJISCAFF0190	64.29	460.32	KEEP	0	0	715	1031.63	309745	331160	0.51068	100	0	0	FALSE	FALSE	-1	-1	0	0	0	0	0	0	BASPBJ1090_pilon (Unplaced) Diploidocus:PRIMARY|PRIMARY|PRIMARY|PRIMARY|PRIMARY|PRIMARY	WEAK|DIP|REPT|NON|REP|NONE	GOOD|EXS|HOMO|TOP|REP|NONE	WEAK|EXS|REPT|TOP|REP|NONE	PRIMARY	PRIMARY	PRIMARY	keep	7
BASENJISCAFF0844	1278	1	1.2598	99.1393	1267	0	2	0.4416	100	0	0	0	-	-	0	0	JUNK	0	0	1	1.34665	0	16.3762	0.46166	25.3994	0	0	FALSE	FALSE	-1	-1	0	0	0	0	0	0	BASPBJ1091_pilon (Unplaced)	LOWX|LOW|UNIQ|NON|PRI|NONE	-	-	LOWCOV	-	-	junk	1
BASENJISCAFF0845	39841	811	930.933	99.9925	39838	1824	1307	0.5061	0.00753	0.043	0.02	99.93	-	-	0	0	JUNK	0	0	752	1152.49	347191	363564	0.51299	99.5831	0	0	FALSE	FALSE	-1	-1	0	0	0	0	0	0	BASPBJ1093_pilon (Unplaced) Diploidocus:COLLAPSED|COLLAPSED|COLLAPSED|COLLAPSED|COLLAPSED|COLLAPSED	PURE|EXS|UNIQ|NON|REP|NONE	-	-	COLLAPSED	-	-	repeat	7
BASENJISCAFF0846	714	2	1.937	99.8599	713	0	2	0.5434	100	0	0	0	-	-	0	0	JUNK	0	0	1	1.7064	0	249.875	0.54622	15.9884	0	0	FALSE	FALSE	-1	-1	0	0	0	0	0	0	BASPBJ1094_pilon (Unplaced)	LOWX|LOW|UNIQ|NON|PRI|NONE	-	-	LOWCOV	-	-	junk	1
BASENJISCAFF0847	890	4	3.5551	99.8876	889	2	6	0.5708	100	0	0	0	-	-	0	0	JUNK	0	0	1	42.1539	0	6733.56	0.56854	38.0787	0	0	FALSE	FALSE	-1	-1	0	0	0	0	0	0	BASPBJ1096_pilon (Unplaced)	PURE|LOW|UNIQ|NON|PRI|NONE	-	-	HPURGE	-	-	quarantine	1
BASENJISCAFF0848	3858	37	40.5516	100	3858	98	0	0.5094	0	4.355	95.65	0	-	-	0	0	KEEP	0	0	1	629.414	0	89925.3	0.52255	45.3549	0	0	FALSE	FALSE	-1	-1	0	0	0	0	0	0	BASPBJ1098_pilon (Unplaced) Diploidocus:PRIMARY|PRIMARY|PRIMARY|PRIMARY|PRIMARY|PRIMARY	PURE|DIP|UNIQ|NON|PRI|NONE	-	-	PRIMARY	-	-	keep	7
BASENJISCAFF0849	1584	6	7.5278	100	1584	7	8	0.5525	54.67	45.33	0	0	BASENJISCAFF0980	BASENJISCAFF0580	42.17	57.77	KEEP	0	0	1	94.3845	0	13543.8	0.56629	39.2169	0	0	FALSE	FALSE	-1	-1	0	0	0	0	0	0	BASPBJ1099_pilon (Unplaced)	GOOD|LOW|PART|NON|PRI|NONE	GOOD|HAP|REPT|TOP|PRI|NONE	GOOD|HAP|PART|SEC|PRI|NONE	HPURGE	PRIMARY	HPURGE	quarantine	1
BASENJISCAFF0850	787	0	0	0	0	0	0	0	100	0	0	0	-	-	0	0	KEEP	0	0	1	3.25624	0	176.798	0.31639	21.9448	0	0	FALSE	FALSE	-1	-1	0	0	0	0	0	0	BASPBJ1100_pilon (Unplaced)	LOWX|LOW|UNIQ|NON|PRI|NONE	-	-	LOWCOV	-	-	junk	1
BASENJISCAFF0851	470	3	2.8532	100	470	4	0	0.5075	100	0	0	0	-	-	0	0	JUNK	0	0	1	618.322	0	72759.1	0.50638	46.1712	0	0	FALSE	FALSE	-1	-1	0	0	0	0	0	0	BASPBJ1102_pilon (Unplaced)	PURE|LOW|UNIQ|NON|PRI|NONE	-	-	LOWQUAL	-	-	quarantine	1
BASENJISCAFF0852	616	0	0	0	0	0	0	0	100	0	0	0	-	-	0	0	KEEP	0	0	1	1059.72	0	41869.4	0.41234	44.0678	0	0	FALSE	FALSE	-1	-1	0	0	0	0	0	0	BASPBJ1104_pilon (Unplaced)	LOWX|LOW|UNIQ|NON|PRI|NONE	-	-	LOWCOV	-	-	junk	1
BASENJISCAFF0853	5832	44	42.3741	100	5832	45	40	0.51	2.418	24.74	72.84	0	BASENJISCAFF0884	BASENJISCAFF0135	98.7	719.02	REPEAT	0	0	1888	2101.16	222103	288556	0.51252	96.0558	0	0	FALSE	FALSE	-1	-1	0	0	0	0	0	0	BASPBJ1105_pilon (Unplaced) Diploidocus:PRIMARY|PRIMARY|PRIMARY|PRIMARY|PRIMARY|PRIMARY	GOOD|DIP|REPT|NON|REP|NONE	GOOD|EXS|REPT|TOP|REP|NONE	WEAK|HAP|REPT|TOP|REP|NONE	PRIMARY	PRIMARY	KEEP	keep	7
BASENJISCAFF0854	2396	6	7.1661	100	2396	1	14	0.3898	59.22	40.78	0	0	BASENJICHR9.01	BASENJICHR27.01	85.48	164.86	KEEP	0	0	3987	4133.93	172066	168270	0.40192	96.9198	0	0	FALSE	FALSE	-1	-1	0	0	0	0	0	0	BASPBJ1106_pilon (Unplaced)	GOOD|LOW|HOMO|NON|REP|NONE	PURE|DIP|UNIQ|TOP|PRI|COMP	PURE|DIP|UNIQ|TOP|PRI|COMP	HPURGE	PRIMARY	PRIMARY	quarantine	1
BASENJISCAFF0855	559	5	5.3023	100	559	3	3	0.5425	100	0	0	0	-	-	0	0	JUNK	0	0	1	40.5779	0	8280.6	0.56708	39.7749	0	0	FALSE	FALSE	-1	-1	0	0	0	0	0	0	BASPBJ1109_pilon (Unplaced)	PURE|LOW|UNIQ|NON|PRI|NONE	-	-	HPURGE	-	-	quarantine	1
[truncated: 246 more rows]

## Sheet: Supp Table 3. GeMoMa
Supplementary Table 3. GeMoMa summary statistics and annotation comparisons.
[truncated: 13 more rows]

## Sheet: Supp Table 4. AMY2B
Supplementary Table 4. AMY2B short read mapping and estimated copy number in Basenji dogs.
SRR ID	Total bases	Total Avg Cover	Amy2b bases	Amy2b average cover	Est Copy number
[truncated: 12 more rows]

## Sheet: Supp Table 5. NuMTs
Supplementary Table 5. CanFam_Bas nuclear mitochondrial sequence (NUMT) fragments.
[truncated: 507 more rows]

[truncated: 4 more sheets: Supp Table 6. Merged NUMTs, Supp Table 7. SVs, Supp Table 8. Breeds, Supp Table 9. SRA Runs]
